# Supplementary material for: Genomic and proteomic signatures highlight diverse pathways between obesity and type-2 diabetes
Source: Research Square preprint supplement (doi:10.21203/rs.3.rs-6079296/v1), 2025-03-14
Supplement: Supplementary file 1 [file 6108b47a16d8de5c0f0b6067.pdf]

## SUPPLEMENTARY MATERIALS

### *Table of Contents*

|                                                                                                                                                                        |                 |
|------------------------------------------------------------------------------------------------------------------------------------------------------------------------|-----------------|
| <b><i>Supplementary Table 1. UKB Participants' baseline characteristics.....</i></b>                                                                                   | <b><i>2</i></b> |
| <b><i>Supplementary Table 2. Field codes of variables used .....</i></b>                                                                                               | <b><i>2</i></b> |
| <b><i>Supplementary Figure 1. A comparison of cluster means from MR-clust and the inverse-variance weighted (IVW) Mendelian randomization (MR) estimates. ....</i></b> | <b><i>3</i></b> |
| <b><i>Supplementary Figure 2. Cluster-specific MR estimates for effect of BMI on T2D, from UKB in sex-combined and sex-stratified analyses.....</i></b>                | <b><i>4</i></b> |
| <b><i>Supplementary Figure 3. Cluster-specific MR estimates for effect of BMI on protein levels, sex-combined and sex-stratified analyses. ....</i></b>                | <b><i>5</i></b> |
| <b><i>Supplementary Figure 4. Difference between males and females in cluster-specific MR estimates for effect of BMI on protein levels. ....</i></b>                  | <b><i>6</i></b> |

**Supplementary Table 1.** UKB Participants' baseline characteristics

| <i>Attribute</i>      | <i>Females</i>        | <i>Males</i>        |
|-----------------------|-----------------------|---------------------|
| <i>N (%)</i>          | <i>194184 (53.8%)</i> | <i>166587</i>       |
| <i>BMI (mean, SD)</i> | <i>27.04 (5.14)</i>   | <i>27.85 (4.23)</i> |
| <i>Age (mean, SD)</i> | <i>56.68 (7.9)</i>    | <i>57.13 (8.08)</i> |
| <i>Alcohol: Never</i> | <i>8368</i>           | <i>2790</i>         |
| <i>Previous</i>       | <i>6927</i>           | <i>5297</i>         |
| <i>Current</i>        | <i>178712</i>         | <i>158360</i>       |
| <i>Smoking: Never</i> | <i>115121</i>         | <i>81400</i>        |
| <i>Previous</i>       | <i>61828</i>          | <i>65014</i>        |
| <i>Current</i>        | <i>16587</i>          | <i>19587</i>        |
| <i>T2D: No</i>        | <i>182033</i>         | <i>148001</i>       |
| <i>Yes</i>            | <i>12151</i>          | <i>18586</i>        |

**Supplementary Table 2.** Field codes of variables used

| <i>Phenotype/ Variable</i>             | <i>UKB Field code</i>                                                                                                                                                                                                                                                                                                  |
|----------------------------------------|------------------------------------------------------------------------------------------------------------------------------------------------------------------------------------------------------------------------------------------------------------------------------------------------------------------------|
| <i>Age</i>                             | <i>21022</i>                                                                                                                                                                                                                                                                                                           |
| <i>Sex</i>                             | <i>30</i>                                                                                                                                                                                                                                                                                                              |
| <i>BMI</i>                             | <i>23104</i>                                                                                                                                                                                                                                                                                                           |
| <i>Smoking status</i>                  | <i>20116</i>                                                                                                                                                                                                                                                                                                           |
| <i>Alcohol consumption</i>             | <i>20117</i>                                                                                                                                                                                                                                                                                                           |
| <i>Genetic Batch</i>                   | <i>22000</i>                                                                                                                                                                                                                                                                                                           |
| <i>UKB centre</i>                      | <i>54</i>                                                                                                                                                                                                                                                                                                              |
| <i>Type-2 diabetes</i>                 | <i>130708</i>                                                                                                                                                                                                                                                                                                          |
| <i>Height</i>                          | <i>50</i>                                                                                                                                                                                                                                                                                                              |
| <i>Weight</i>                          | <i>21002</i>                                                                                                                                                                                                                                                                                                           |
| <i>Genetic principal components</i>    | <i>22009</i>                                                                                                                                                                                                                                                                                                           |
| <b><i>Proteomic data</i></b>           |                                                                                                                                                                                                                                                                                                                        |
| <i>Participation in the PPP cohort</i> | <i>30903</i>                                                                                                                                                                                                                                                                                                           |
| <i>Time to processing for proteins</i> | <i>Time to processing: Calculated as difference between olink processing start date and date of sample collection. Information provided in "resources" tab of Protein Biomarkers (<a href="https://biobank.ndph.ox.ac.uk/showcase/label.cgi?id=1839">https://biobank.ndph.ox.ac.uk/showcase/label.cgi?id=1839</a>)</i> |
| <i>Protein assay batch number</i>      | <i>30901</i>                                                                                                                                                                                                                                                                                                           |

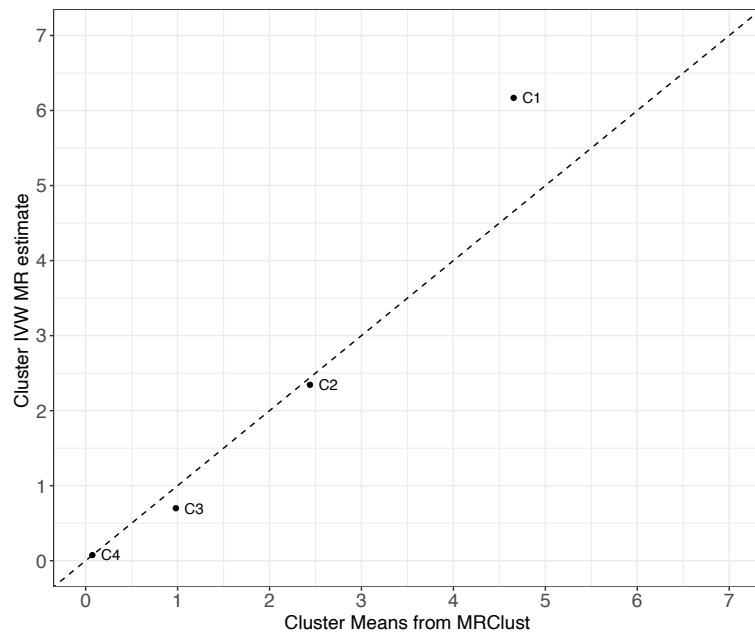

**Supplementary Figure 1.** A comparison of cluster means from MR-clust and the inverse-variance weighted (IVW) Mendelian randomization (MR) estimates. Values in the figure are presented as exponentiated cluster means (on X) and odds ratios (OR) for IVW MR estimates (on Y).

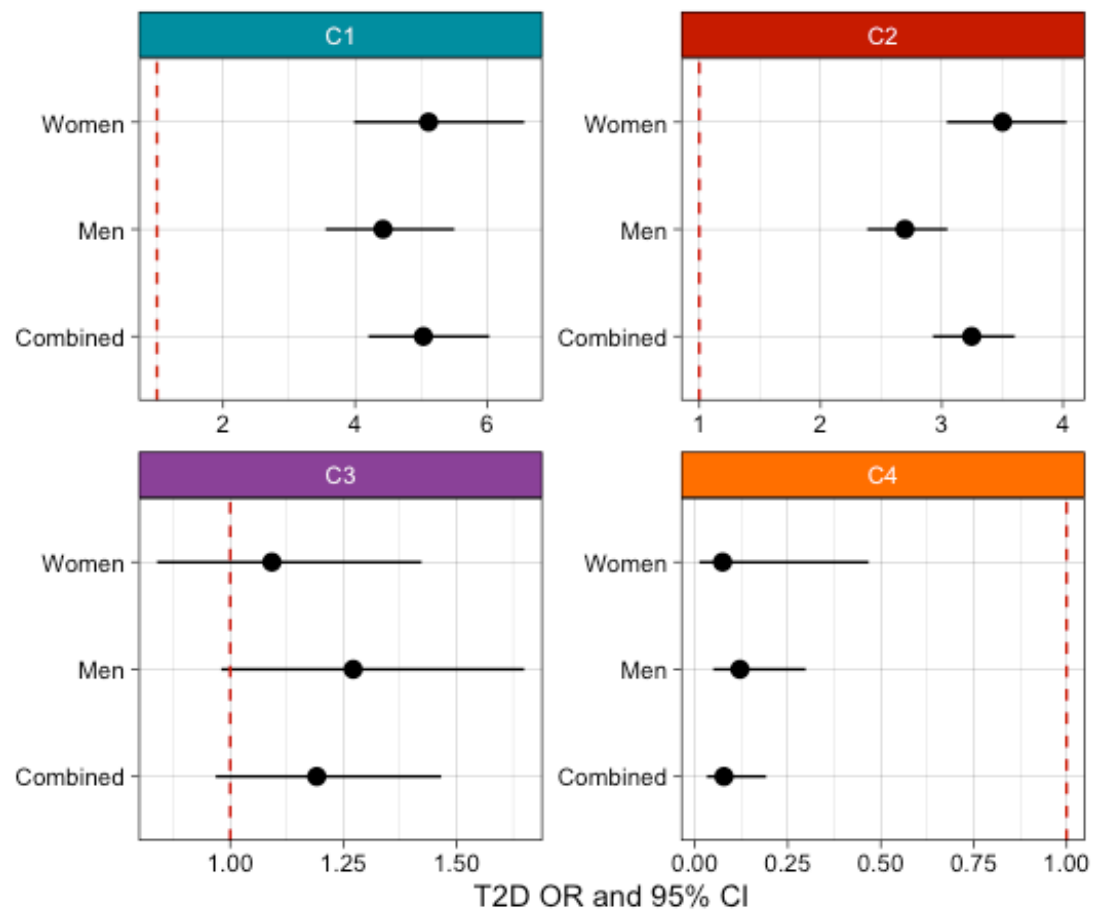

**Supplementary Figure 2.** Cluster-specific MR estimates for effect of BMI on T2D, from UKB in sex-combined and sex-stratified analyses.

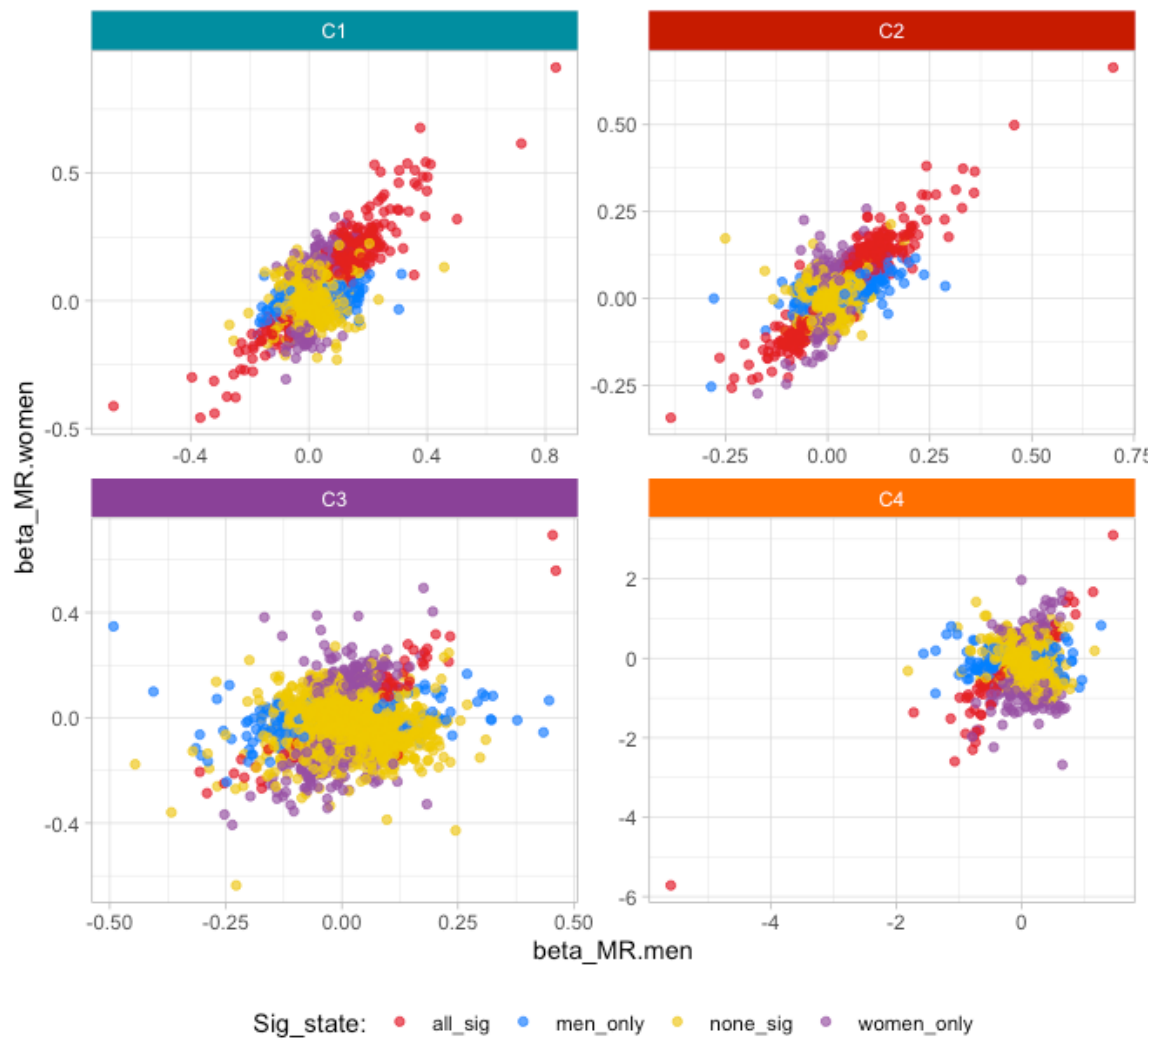

**Supplementary Figure 3.** Cluster-specific MR estimates for effect of BMI on protein levels, sex-combined and sex-stratified analyses. Abbreviations: Sig\_state = indicates whether a protein is significantly associated with BMI in males (men\_only), females (women\_only), both (all\_sig), or neither (none\_sig), with a significance threshold of  $p < 0.05$ .

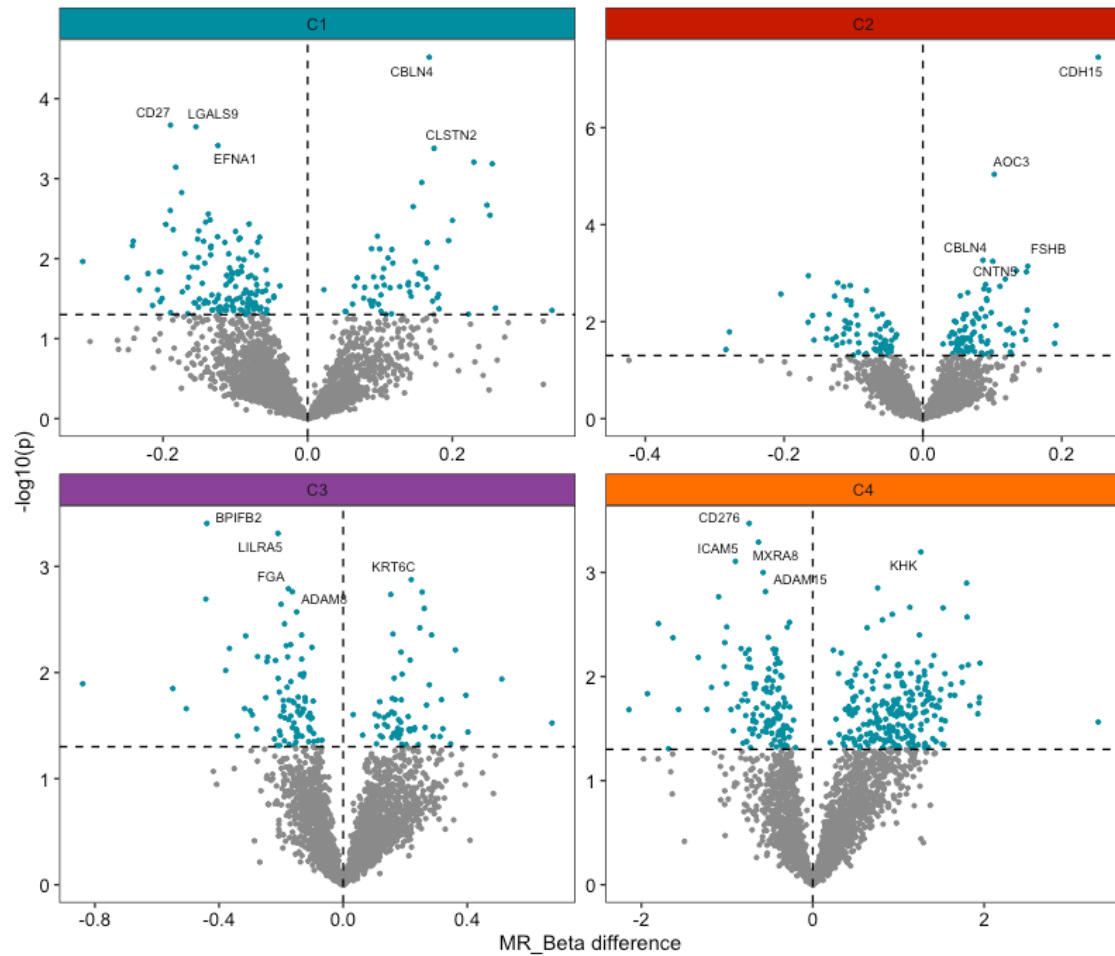

**Supplementary Figure 4.** Difference between males and females in cluster-specific MR estimates for effect of BMI on protein levels. Blue points represent proteins with a significant ( $p < 0.05$ ) difference between males and females, and grey points represent proteins with no significant difference.
