# Supplementary material for: Genomic and proteomic signatures highlight diverse pathways between obesity and type-2 diabetes
Source: Research Square preprint supplement (doi:10.21203/rs.3.rs-6079296/v1), 2025-03-14
Supplement: Supplementary file 1 [file e24636a7f5a7dbc5174da441.xlsx]

## Sheet: CONTENT
LIST OF TABLES
ST.1	SNPs WITH INDIVIDUAL COHORT AND META-ANALYSIS EFFECT SIZES
ST.2	HARMONIZED BMI-T2D DATA WITH CLUSTERING RESULTS
ST.3	CLUSTER-SPECIFIC MR IVW RESULTS SHOWING 0.5 AND 0.8 PROBABILITIES TO BELONG TO A CLUSTER
ST.4	MR RESULTS OF BMI-PROTEIN ASSOCIATION IN UKB
ST.5	MR RESULTS OF PROTEINS-T2D ASSOCIATION
ST.6	SENSITIVITY ANALYSES RESULTS OF PROTEIN-T2D ASSOCIATIONS
ABBREVIATIONS
EA	Effect Allele
NEA	Non-Effect Allele
SNP	Single Nucleotide Polymorphism
.gt	GIANT
.fn	FinnGen
.meta	Meta-analysis
se	Standard Error
pval	P- value
lci	Lower confidence interval
uci	Upper confidence interval
OR	Odds Ratio
MR	Mendelian Randomization
IVW	Inverse Variance Weighted
MRPRESSO	Mendelian Randomization Pleiotropy Residual Sum and Outlier
MR-SPI	Mendelian Randomization with Selection and Post-selection Inference

## Sheet: ST.1
SNPs WITH INDIVIDUAL COHORT AND META-ANALYSIS EFFECT SIZES
SNP	EA.gt	NEA.gt	EAF.gt	beta.gt	se.gt	pval.gt	beta.fn	EA.fn	NEA.fn	EAF.fn	beta.meta	se.meta	pval.meta
rs1000940	G	A	0.225	0.0192	0.0034	1.284e-08	0.0151581	G	A	0.424492	0.0166929	0.0020951	1.61835e-15
rs10083361	G	A	0.4583	0.0081	0.004	0.04287	0.0146614	G	A	0.493644	0.0126772	0.00219964	8.24826e-09
rs10118701	A	G	0.7083	-0.0132	0.004	0.0009668	-0.0164637	A	G	0.606566	-0.0154504	0.00222886	4.15047e-12
rs10132280	A	C	0.3333	-0.023	0.0034	1.141e-11	-0.0227291	A	C	0.346397	-0.0228364	0.00213943	1.3463e-26
rs10182181	A	G	0.5	-0.0307	0.0031	8.777e-24	-0.0309488	A	G	0.582197	-0.0308433	0.00201851	1.03514e-52
rs10186145	A	G	0.4917	-0.0139	0.0037	0.0001721	-0.0113049	A	G	0.445473	-0.0121795	0.00214795	1.42566e-08
rs10192119	T	G	0.7833	-0.0196	0.004	1.106e-06	-0.0127186	T	G	0.802206	-0.0154945	0.00254053	1.06785e-09
rs10269783	A	G	0.4917	0.0144	0.0031	4.135e-06	0.0151089	A	G	0.457691	0.0148125	0.00200435	1.46594e-13
rs10456700	C	T	0.5917	-0.0143	0.0033	2.032e-05	-0.02	C	T	0.733639	-0.0174582	0.00220367	2.33058e-15
rs1045861	G	T	0.2583	-0.0106	0.0041	0.009728	-0.0165677	G	T	0.285841	-0.0145707	0.00237175	8.07562e-10
rs10460960	G	A	0.0833	-0.02	0.0048	2.877e-05	-0.0192517	G	A	0.104025	-0.0195853	0.00320475	9.88022e-10
rs10475800	G	C	0.5	0.0109	0.0038	0.004125	0.0160481	G	C	0.542614	0.0143764	0.00216539	3.15394e-11
rs10510554	T	C	0.4333	-0.0183	0.0031	4.178e-09	-0.0180102	T	C	0.469153	-0.0181312	0.00200342	1.42797e-19
rs10514710	G	A	0.8	0.0121	0.0039	0.001842	0.0202627	G	A	0.803776	0.016855	0.00251986	2.24864e-11
rs1051730	A	G	0.4	-0.0108	0.0033	0.0009409	-0.0169522	A	G	0.331252	-0.0143973	0.00212659	1.28648e-11
rs1052177	G	A	0.3333	-0.005	0.0049	0.3075	-0.0196119	G	A	0.293286	-0.0158489	0.00248662	1.84571e-10
rs1062633	C	T	0.55	0.0147	0.0037	7.098e-05	0.024233	C	T	0.398193	0.0209585	0.00216851	4.24895e-22
rs10750540	C	G	0.55	0.0087	0.0038	0.02205	0.0163412	C	G	0.689165	0.0136024	0.002275	2.24387e-09
rs10772983	T	C	0.6083	-0.0124	0.003	4.615e-05	-0.00964633	T	C	0.499856	-0.0108361	0.00197192	3.90316e-08
rs10779751	A	G	0.2917	0.0151	0.0034	8.537e-06	0.0136988	A	G	0.256168	0.0143132	0.00225143	2.052e-10
rs10786019	C	G	0.6833	0.0073	0.0041	0.075	0.014621	C	G	0.568245	0.0124672	0.0022238	2.06736e-08
rs10819656	C	G	0.8333	-0.015	0.0049	0.002204	-0.0233149	C	G	0.725846	-0.0211164	0.00251957	5.24967e-17
rs10883648	A	C	0.5167	-0.0111	0.0037	0.0027	-0.0136576	A	C	0.419664	-0.0127881	0.0021574	3.07544e-09
rs10886017	A	C	0.2083	0.0142	0.0035	5.327e-05	0.0178733	A	C	0.245875	0.0162947	0.00229447	1.23215e-12
rs10899469	C	T	0.1167	-0.0159	0.0042	0.0001657	-0.0150614	C	T	0.19453	-0.0153823	0.00259826	3.21478e-09
rs10902221	C	T	0.525	0.0112	0.0043	0.009197	0.0137087	C	T	0.582978	0.0130184	0.00225555	7.84589e-09
rs10903340	T	G	0.5917	-0.0108	0.0032	0.0006532	-0.0123601	T	G	0.473261	-0.0117224	0.00204593	1.00666e-08
rs10909880	T	C	0.4667	-0.0139	0.0032	1.766e-05	-0.0122757	T	C	0.431343	-0.0129395	0.00204568	2.52752e-10
rs10920678	A	G	0.4	0.0147	0.0031	1.434e-06	0.0131754	A	G	0.526441	0.0138115	0.00200235	5.28764e-12
rs10923724	C	T	0.4583	0.0117	0.0031	0.0001325	0.0130984	C	T	0.320167	0.0124676	0.00208204	2.12206e-09
rs10929925	C	A	0.65	0.0152	0.0031	1.243e-06	0.0191646	C	A	0.503389	0.0175115	0.00200174	2.16885e-18
rs10932071	T	C	0.0583	0.0268	0.0079	0.0006928	0.033163	T	C	0.060432	0.031069	0.00453193	7.10234e-12
rs10968576	G	A	0.2917	0.0249	0.0033	6.607e-14	0.0220306	G	A	0.373572	0.0231848	0.00209297	1.6133e-28
rs10984333	T	G	0.2583	-0.0145	0.0038	0.0001123	-0.0148067	T	G	0.259046	-0.0146893	0.00235154	4.19313e-10
rs10985963	T	C	0.3417	0.0128	0.0041	0.001797	0.0146684	T	C	0.403884	0.0141109	0.00223953	2.96031e-10
rs11029764	C	T	0.0667	-0.0089	0.0115	0.439	-0.0353582	C	T	0.0617849	-0.0304382	0.00495909	8.36487e-10
rs11038440	C	T	0.5	-0.0129	0.0031	3.486e-05	-0.0153565	C	T	0.558467	-0.0143249	0.00200886	9.97261e-13
rs11052536	C	T	0.9	-0.0151	0.0045	0.0008549	-0.0213308	C	T	0.866278	-0.0187022	0.00292282	1.56726e-10
rs11065612	G	T	0.825	-0.0155	0.0036	2.16e-05	-0.011	G	T	0.734569	-0.0128221	0.00229078	2.17749e-08
rs1106908	G	A	0.5417	0.0154	0.0031	4.204e-07	0.0190366	G	A	0.597756	0.0174853	0.00202472	5.82651e-18
rs11079691	A	T	0.1833	-0.0096	0.0047	0.0411	-0.017105	A	T	0.207152	-0.0146974	0.00266205	3.36944e-08
rs11102112	G	A	0.3421	0.0071	0.0042	0.09094	0.0156925	G	A	0.304202	0.0129751	0.00236193	3.94194e-08
rs11105839	T	A	0.625	0.0131	0.0031	2.973e-05	0.0134887	T	A	0.638587	0.0133196	0.00204489	7.33723e-11
rs11115176	T	C	0.825	0.0146	0.0036	5.1e-05	0.015669	T	C	0.773248	0.0152091	0.00236125	1.18597e-10
rs11121213	A	C	0.1271	-0.016	0.0048	0.0008581	-0.0174299	A	C	0.17546	-0.016944	0.00279823	1.40214e-09
rs11126666	G	A	0.6917	-0.0207	0.0034	1.332e-09	-0.0131534	G	A	0.641915	-0.0161249	0.00213348	4.09299e-14
rs11131585	T	C	0.7667	0.0164	0.0044	0.0001936	0.0131253	T	C	0.69886	0.0141017	0.00240259	4.37468e-09
rs11134425	A	G	0.55	-0.0088	0.0031	0.00433	-0.0139172	A	G	0.412478	-0.0117461	0.00201924	5.98799e-09
rs11155262	G	T	0.2833	-0.0142	0.0043	0.0009589	-0.0149329	G	T	0.244695	-0.0146863	0.00249418	3.90323e-09
rs11170468	C	A	0.1917	-0.0195	0.0036	7.032e-08	-0.0166866	C	A	0.18903	-0.0179968	0.00245668	2.37765e-13
rs11172496	G	T	0.975	0.0252	0.0127	0.04723	0.0460302	G	T	0.966419	0.0408245	0.00634887	1.27437e-10
rs11229439	G	A	0.1917	-0.0008	0.0051	0.8754	0.0221089	G	A	0.192271	0.0152751	0.00278547	4.16182e-08
rs11577179	A	G	0.3833	-0.0134	0.0032	3.603e-05	-0.0230445	A	G	0.381627	-0.0190303	0.00206447	3.02656e-20
rs11583200	C	T	0.375	0.0177	0.0031	1.479e-08	0.0131819	C	T	0.465735	0.0150725	0.00200532	5.63647e-14
rs1159974	C	T	0.4833	0.0088	0.0037	0.01739	0.0138067	C	T	0.508098	0.0121324	0.00213963	1.42512e-08
rs11611246	T	G	0.1667	0.0207	0.004	2.134e-07	0.0245863	T	G	0.216852	0.0230763	0.00249337	2.14174e-20
rs11632852	T	C	0.5083	-0.0098	0.0037	0.008081	-0.0152958	T	C	0.506561	-0.0134641	0.00213608	2.9162e-10
rs11637749	A	C	0.45	-0.0119	0.0038	0.001739	-0.0117085	A	C	0.487533	-0.0117701	0.0021553	4.73429e-08
rs11642740	A	G	0.5833	-0.0174	0.0038	4.673e-06	-0.0216132	A	G	0.636419	-0.0201835	0.00221359	7.65273e-20
rs11664	A	G	0.2667	-0.0146	0.0044	0.0009061	-0.0260316	A	G	0.209355	-0.0220321	0.00260255	2.54855e-17
rs11672660	C	T	0.825	0.0345	0.004	8.493e-18	0.0193668	C	T	0.740654	0.0247982	0.00239635	4.25897e-25
rs1167309	C	T	0.3333	0.0192	0.004	1.587e-06	0.0152915	C	T	0.379838	0.0165205	0.00224298	1.76601e-13
rs1167800	G	A	0.4833	-0.0195	0.0033	3.066e-09	-0.0159344	G	A	0.482824	-0.0173098	0.0020496	3.02823e-17
rs11679265	A	G	0.9917	-0.0252	0.0172	0.1429	-0.0379191	A	G	0.959225	-0.0362516	0.00622771	5.84896e-09
rs11692071	T	G	0.45	0.0094	0.004	0.01877	0.0173714	T	G	0.363198	0.0148376	0.00225518	4.72547e-11
rs11692326	T	C	0.2417	0.0194	0.0036	1.001e-07	0.0163331	T	C	0.216333	0.0176795	0.00238531	1.24571e-13
rs11707605	T	C	0.6167	-0.0122	0.0043	0.004551	-0.0188046	T	C	0.811582	-0.0162881	0.00265428	8.43394e-10
rs11716220	T	C	0.825	0.0101	0.0051	0.04766	0.0158026	T	C	0.748082	0.0143043	0.0026142	4.45596e-08
rs11727676	C	T	0.075	-0.0358	0.0064	2.55e-08	-0.0215918	C	T	0.0859415	-0.0265454	0.00377896	2.14784e-12
rs11738695	C	A	0.5167	-0.0093	0.0038	0.01439	-0.0164366	C	A	0.420436	-0.0140979	0.00217531	9.11804e-11
rs11750790	A	G	0.825	0.0104	0.0052	0.0455	0.0168252	A	G	0.78337	0.0150738	0.00271493	2.8215e-08
rs11754747	C	T	0.6667	-0.0136	0.0037	0.0002064	-0.0191683	C	T	0.78633	-0.0167637	0.00243143	5.40279e-12
rs11755266	C	T	0.9333	-0.0194	0.0052	0.0001955	-0.0180846	C	T	0.869246	-0.0185567	0.00311523	2.57284e-09
rs11781699	T	C	0.7917	-0.0133	0.0039	0.0007029	-0.0170338	T	C	0.717051	-0.0156991	0.00233171	1.66316e-11
rs11823283	A	G	0.1167	0.0157	0.0052	0.002534	0.0200304	A	G	0.197343	0.0187903	0.00278276	1.45431e-11
rs1184523	T	G	0.6833	0.0031	0.0042	0.4605	0.0192552	T	G	0.577668	0.0146256	0.00224836	7.77039e-11
rs11847697	T	C	0.0417	0.0492	0.0084	3.99e-09	0.0529667	T	C	0.0158012	0.0506476	0.00659106	1.53849e-14
rs11880870	G	A	0.4583	-0.0176	0.0035	4.272e-07	-0.0167984	G	A	0.528252	-0.0170859	0.00209617	3.60861e-16
rs11919195	A	G	0.8667	-0.0116	0.0047	0.01436	-0.0208938	A	G	0.877482	-0.0169932	0.00304487	2.39244e-08
rs11978101	A	G	0.3167	-0.0105	0.0048	0.02871	-0.0156841	A	G	0.264535	-0.0142515	0.00252326	1.62252e-08
rs1199334	G	A	0.8	-0.0161	0.0038	2.839e-05	-0.0150016	G	A	0.786178	-0.0154558	0.00244364	2.53352e-10
rs11997175	T	C	0.4917	-0.0141	0.0031	3.744e-06	-0.0127453	T	C	0.470003	-0.0133112	0.00200364	3.06307e-11
rs12122071	A	G	0.386	0.0143	0.0038	0.0001678	0.0135736	A	G	0.383303	0.0138163	0.0021967	3.18311e-10
rs12150261	T	G	0.4667	-0.0098	0.0031	0.001355	-0.013255	T	G	0.449995	-0.0118104	0.00200452	3.81843e-09
rs12269541	C	A	0.175	0.0153	0.0049	0.001794	0.0161612	C	A	0.211472	0.0159015	0.00269077	3.42827e-09
rs12286929	G	A	0.4333	0.0217	0.0031	1.31e-12	0.0168345	G	A	0.525299	0.0188714	0.00200579	5.03358e-21
rs12379623	A	G	0.4917	-0.0123	0.0038	0.001209	-0.011901	A	G	0.430868	-0.0120312	0.00217066	2.9794e-08
rs12429002	G	A	0.625	0.0127	0.004	0.001498	0.0186197	G	A	0.764579	0.0164086	0.00244462	1.91772e-11
rs12429545	G	A	0.9	-0.0334	0.0047	1.094e-12	-0.0292501	G	A	0.859811	-0.0308812	0.00294655	1.06236e-25
rs12431280	A	G	0.1583	-0.0123	0.0047	0.00887	-0.0269371	A	G	0.165271	-0.0216528	0.00282399	1.75461e-14
rs12446632	A	G	0.1333	-0.0403	0.0046	1.477e-18	-0.037888	A	G	0.125088	-0.0389164	0.00300363	2.16039e-38
rs12454712	T	C	0.6333	-0.0169	0.0039	1.456e-05	-0.0117436	T	C	0.512975	-0.0133556	0.00218062	9.08571e-10
rs12471691	A	G	0.975	0.0079	0.0078	0.3111	0.0240922	A	G	0.876578	0.0207424	0.00354772	5.01456e-09
rs12486280	G	T	0.8667	0.019	0.0042	5.718e-06	0.0157823	G	T	0.849149	0.0171687	0.00275692	4.73957e-10
rs12502727	G	A	0.1	0.0203	0.0063	0.001272	0.0180412	G	A	0.118982	0.0187002	0.00340273	3.8933e-08
rs12513212	C	A	0.3833	0.0084	0.004	0.03573	0.0151764	C	A	0.494345	0.013141	0.00219222	2.04267e-09
rs12519315	T	A	0.3583	0.0138	0.0041	0.0007631	0.0136542	T	A	0.367785	0.0136987	0.00226559	1.48107e-09
rs12566985	G	A	0.425	0.0242	0.0031	3.282e-15	0.0180655	G	A	0.508013	0.020627	0.00200318	7.26016e-25
rs12593036	A	G	0.6583	0.0179	0.0041	1.266e-05	0.0109149	A	G	0.718293	0.0132596	0.0023754	2.37729e-08
rs12596638	G	A	0.825	0.0128	0.004	0.001272	0.0158546	G	A	0.744379	0.0147467	0.00240901	9.27153e-10
rs12622013	A	G	0.9	-0.0217	0.005	1.354e-05	-0.0140318	A	G	0.870513	-0.0169392	0.00307875	3.75584e-08
rs12626122	G	A	0.4298	0.0156	0.0044	0.0003919	0.0175454	G	A	0.397709	0.0170195	0.00228778	1.01222e-13
rs12651574	T	A	0.1833	-0.0056	0.0047	0.2335	-0.019983	T	A	0.205653	-0.0153129	0.00267815	1.07969e-08
rs12701887	T	G	0.4583	0.0062	0.0047	0.1871	0.0164276	T	G	0.467074	0.0139785	0.00229991	1.21787e-09
rs12831874	G	T	0.9	0.0126	0.0059	0.03271	0.0204373	G	T	0.852	0.018232	0.00312973	5.69732e-09
rs12885454	C	A	0.6333	0.0207	0.0033	1.943e-10	0.0238278	C	A	0.644712	0.0225558	0.00210443	8.35561e-27
rs12899850	C	T	0.8167	0.0177	0.0048	0.0002265	0.0142578	C	T	0.746497	0.0152316	0.002553	2.4291e-09
rs12912988	T	G	0.4667	0.0085	0.0038	0.0253	0.015549	T	G	0.440061	0.0132516	0.0021694	1.00625e-09
rs12940622	A	G	0.4583	-0.0182	0.0031	2.494e-09	-0.0161145	A	G	0.361606	-0.0170267	0.00205021	9.99496e-17
rs12961741	G	A	0.4917	0.0091	0.0037	0.01391	0.0130369	G	A	0.460707	0.0117156	0.00214352	4.61367e-08
rs1296328	C	A	0.5917	-0.0137	0.004	0.0006148	-0.0129373	C	A	0.48188	-0.0131671	0.0021954	2.00308e-09
rs13011472	G	C	0.4417	-0.0134	0.0037	0.0002928	-0.0160689	G	C	0.450402	-0.01517	0.00214725	1.60765e-12
rs13021737	A	G	0.125	-0.0601	0.004	1.113e-50	-0.0667154	A	G	0.163992	-0.0638065	0.00265246	7.29181e-128
rs13037435	A	G	0.85	0.0132	0.0058	0.02285	0.0195996	A	G	0.80696	0.0180026	0.00289739	5.18603e-10
rs13069244	G	A	0.9417	-0.0239	0.006	7.615e-05	-0.0255978	G	A	0.954215	-0.0247057	0.00434934	1.34439e-08
rs13078960	T	G	0.8167	-0.0297	0.0039	1.737e-14	-0.0251226	T	G	0.826313	-0.0271345	0.00258557	9.14966e-26
rs13099106	A	G	0.4333	-0.0174	0.0038	4.673e-06	-0.011199	A	G	0.424635	-0.0132358	0.00217786	1.22117e-09
rs13099482	A	T	0.4083	-0.0146	0.0031	3.235e-06	-0.00963302	A	T	0.402692	-0.0117527	0.0020251	6.49442e-09
rs13107325	C	T	0.8833	-0.0477	0.0068	1.825e-12	-0.0593161	C	T	0.985759	-0.0508964	0.0057893	1.47624e-18
rs13107802	G	A	0.0667	0.0134	0.0064	0.03628	0.02649	G	A	0.146189	0.0231952	0.00321087	5.04943e-13
rs13114338	A	G	0.7333	-0.0159	0.004	7.038e-05	-0.012592	A	G	0.658839	-0.0136579	0.00227055	1.79638e-09
rs13130484	C	T	0.5667	-0.0401	0.0031	4.239e-38	-0.0389703	C	T	0.529699	-0.0394425	0.00200418	3.19171e-86
rs13155482	T	C	0.2	0.0168	0.0047	0.0003509	0.0191553	T	C	0.165687	0.018304	0.00282558	9.29572e-11
rs13188558	A	G	0.6583	0.0124	0.0038	0.001102	0.0120041	A	G	0.627798	0.0121377	0.0022073	3.82183e-08
rs13191362	A	G	0.8	0.0277	0.0048	7.339e-09	0.0267172	A	G	0.938853	0.0272729	0.00360926	4.14487e-14
rs13228034	C	T	0.5167	-0.0049	0.0038	0.1972	-0.0176491	C	T	0.536698	-0.0135203	0.00216251	4.04928e-10
rs1333010	G	A	0.35	0.0176	0.0041	1.765e-05	0.0227665	G	A	0.484296	0.0212625	0.00221213	7.13192e-22
rs1333702	C	G	0.1417	0.0169	0.0047	0.0003235	0.0138369	C	G	0.194647	0.0148525	0.00270635	4.06428e-08
rs13392503	G	T	0.8417	0.0147	0.0034	1.878e-05	0.0167066	G	T	0.679564	0.0158895	0.00216959	2.41126e-13
rs13407070	G	A	0.25	0.0091	0.0052	0.08012	0.017246	G	A	0.225863	0.0150587	0.00269455	2.2893e-08
rs13417156	T	C	0.6167	-0.0181	0.0035	2.428e-07	-0.0160586	T	C	0.575922	-0.0168022	0.00211239	1.80409e-15
rs13419388	C	T	0.8667	-0.0168	0.0042	7.411e-05	-0.0133697	C	T	0.809218	-0.0146945	0.00261015	1.80458e-08
rs13432797	G	C	0.6167	-0.0124	0.0031	8.274e-05	-0.0140624	G	C	0.669766	-0.0133185	0.00207369	1.33954e-10
rs1349351	A	G	0.4667	-0.0118	0.0031	0.0001451	-0.0131668	A	G	0.426347	-0.0125885	0.0020165	4.30012e-10
rs1362910	A	G	0.3667	0.0132	0.0034	9.364e-05	0.0152154	A	G	0.37386	0.0144294	0.00212335	1.07901e-11
rs1403533	T	C	0.8083	0.0099	0.0047	0.03517	0.0190492	T	C	0.774334	0.0162313	0.00260837	4.8847e-10
rs1436351	G	T	0.275	-0.0158	0.0036	8.336e-06	-0.0196701	G	T	0.211332	-0.0179565	0.00239551	6.58417e-14
rs1439620	G	A	0.7167	-0.0158	0.0033	2.37e-06	-0.0136367	G	A	0.639519	-0.014514	0.00210147	4.9649e-12
rs1441264	A	G	0.55	0.0175	0.0032	6.037e-08	0.0137585	A	G	0.669863	0.0153734	0.00210236	2.62244e-13
rs1445796	G	A	0.325	-0.0151	0.0042	0.0003241	-0.0155532	G	A	0.303137	-0.0154104	0.00235735	6.2686e-11
rs1452075	C	T	0.275	-0.0131	0.0035	0.0001705	-0.0195331	C	T	0.292026	-0.0169156	0.00223256	3.54342e-14
rs1466783	G	C	0.3917	-0.0099	0.0037	0.007458	-0.0126616	G	C	0.530246	-0.0117386	0.00213911	4.07482e-08
rs1469928	G	A	0.275	0.0176	0.0041	1.765e-05	0.0153453	G	A	0.272212	0.0161137	0.00239348	1.66981e-11
rs1472169	T	C	0.4083	-0.0149	0.0038	8.816e-05	-0.0129754	T	C	0.307	-0.0136661	0.00227639	1.93224e-09
rs1488830	T	C	0.8	0.041	0.0038	1.808e-26	0.0407954	T	C	0.834971	0.0408901	0.0025848	2.28467e-56
rs1493354	G	A	0.5583	-0.0061	0.0037	0.09922	-0.0148166	G	A	0.472538	-0.0118826	0.00214664	3.10447e-08
rs1520048	A	G	0.4083	0.0084	0.0037	0.02319	0.0136858	A	G	0.591646	0.0118797	0.00216283	3.95922e-08
rs1528435	T	C	0.5833	0.0178	0.0031	1.196e-08	0.0192045	T	C	0.641704	0.0185909	0.00204895	1.15378e-19
rs1532331	T	G	0.6333	0.0118	0.0041	0.004001	0.0168689	T	G	0.567652	0.015375	0.00222584	4.93365e-12
rs1546924	C	T	0.4167	-0.0141	0.0032	1.2e-05	-0.0163328	C	T	0.476592	-0.0154309	0.0020338	3.26812e-14
rs1560653	C	T	0.8833	-0.0176	0.0067	0.008618	-0.0287619	C	T	0.926984	-0.0247225	0.00403056	8.58269e-10
rs1561589	G	A	0.6667	-0.0157	0.0033	2.467e-06	-0.00944161	G	A	0.751493	-0.0123127	0.00223516	3.61586e-08
rs1568986	T	C	0.25	-0.0177	0.0042	2.506e-05	-0.0147686	T	C	0.241796	-0.0157868	0.00247525	1.79588e-10
rs1580099	C	A	0.3966	0.0138	0.0034	4.792e-05	0.016757	C	A	0.405939	0.0156297	0.00209931	9.68323e-14
rs1582931	G	A	0.5417	0.0131	0.0038	0.0005661	0.0208993	G	A	0.487774	0.0183831	0.00215836	1.63488e-17
rs1593312	T	G	0.2917	0.0156	0.0036	1.169e-05	0.0139363	T	G	0.249002	0.0146267	0.00231914	2.84557e-10
rs1624064	C	T	0.4333	-0.0086	0.0038	0.02363	-0.0180084	C	T	0.455094	-0.0149374	0.00217104	5.97366e-12
rs166297	A	G	0.125	-0.0163	0.0062	0.008563	-0.0187298	A	G	0.163028	-0.0181271	0.00308791	4.34891e-09
rs16851483	G	T	0.9083	-0.0483	0.0077	3.548e-10	-0.0310941	G	T	0.951415	-0.0377179	0.00477756	2.90763e-15
rs16868846	C	G	0.0667	-0.0226	0.0094	0.01621	-0.0263544	C	G	0.069712	-0.0254851	0.00452314	1.75689e-08
rs16896181	A	G	0.9917	-0.0825	0.0189	1.218e-05	-0.0684989	A	G	0.988554	-0.0726672	0.0103124	1.83327e-12
rs16902795	G	C	0.9667	-0.0186	0.0115	0.1058	-0.0334585	G	C	0.940099	-0.0306428	0.00500614	9.29617e-10
rs16907751	C	T	0.9583	0.035	0.0066	1.255e-07	0.0265626	C	T	0.88227	0.0288877	0.00346467	7.56825e-17
rs16912217	C	T	0.8917	-0.0181	0.0059	0.002156	-0.020608	C	T	0.905694	-0.0196933	0.00356314	3.25845e-08
rs16996700	T	C	0.7	0.018	0.0034	1.738e-07	0.0241896	T	C	0.769358	0.0213695	0.002295	1.26251e-20
rs17024393	C	T	0.04167	0.0658	0.0088	7.029e-14	0.0734104	C	T	0.0556623	0.0711528	0.0047929	7.44199e-50
rs17094222	C	T	0.2083	0.0249	0.0038	5.942e-11	0.0268865	C	T	0.239501	0.0261007	0.00239001	9.17372e-28
rs17122581	T	C	0.7917	-0.0135	0.0047	0.004074	-0.0173152	T	C	0.76178	-0.0161731	0.00257158	3.19215e-10
rs17234250	A	C	0.8917	-0.0261	0.0068	0.0001239	-0.0294027	A	C	0.946887	-0.0279963	0.00443746	2.80721e-10
rs17279030	A	C	0.9583	0.0231	0.0095	0.01503	0.0390562	A	C	0.958392	0.0338993	0.00540075	3.45675e-10
rs17381664	C	T	0.425	0.0206	0.0032	2.101e-10	0.0147829	C	T	0.383228	0.0172068	0.00206562	8.07959e-17
rs17391694	T	C	0.1356	0.0299	0.0052	1.025e-08	0.028198	T	C	0.133245	0.0288025	0.00309905	1.48637e-20
rs17414107	C	T	0.1667	0.018	0.0058	0.001913	0.0208834	C	T	0.0994297	0.0198276	0.00350969	1.61031e-08
rs17464848	G	A	0.1917	-0.0156	0.0042	0.0002234	-0.0145389	G	A	0.1747	-0.014966	0.00266466	1.94895e-08
rs17484848	C	T	0.1	0.0204	0.0064	0.001435	0.0204676	C	T	0.108593	0.020447	0.00353217	7.08903e-09
rs17513613	C	T	0.275	0.015	0.0033	5.413e-06	0.00927844	C	T	0.353493	0.011613	0.00210795	3.60574e-08
rs1752156	C	T	0.2333	0.0193	0.0039	9.101e-07	0.0172398	C	T	0.212575	0.0180697	0.0024752	2.87179e-13
rs17522122	G	T	0.5333	-0.0152	0.0033	3.145e-06	-0.0259474	G	T	0.546092	-0.0217367	0.00206558	6.74716e-26
rs17537498	C	T	0.1333	-0.0053	0.0061	0.3849	-0.0203776	C	T	0.18617	-0.0168277	0.00295987	1.30599e-08
rs17573940	G	A	0.2583	0.0127	0.0037	0.0005872	0.0214981	G	A	0.264404	0.0180586	0.00231342	5.90259e-15
rs17616836	A	G	0.3475	-0.0133	0.0042	0.001542	-0.0146574	A	G	0.287294	-0.0142198	0.00238462	2.47419e-09
rs1765131	G	C	0.6583	0.0099	0.0041	0.01575	0.0170056	G	C	0.701935	0.0146736	0.00234879	4.17519e-10
rs17724992	A	G	0.6917	0.0194	0.0035	3.415e-08	0.0147933	A	G	0.7751	0.0168432	0.00233477	5.42925e-13
rs17759796	A	C	0.1333	0.018	0.0044	4.154e-05	0.0216276	A	C	0.10231	0.0198492	0.0030808	1.17245e-10
rs17787739	G	A	0.9167	-0.0128	0.0115	0.2657	-0.0367343	G	A	0.937095	-0.0324021	0.00489263	3.52865e-11
rs17826675	T	G	0.2667	-0.0137	0.0034	6.715e-05	-0.0117258	T	G	0.263608	-0.0125828	0.00224013	1.94307e-08
rs1814170	A	T	0.925	0.0209	0.0062	0.000749	0.0172265	A	T	0.824818	0.0180961	0.00301652	1.98552e-09
rs1837269	T	C	0.5583	-0.0178	0.0037	1.503e-06	-0.0218632	T	C	0.445763	-0.0204966	0.00214579	1.27204e-21
rs1839115	C	T	0.8667	0.0176	0.0042	2.551e-05	0.0128235	C	T	0.768964	0.0145157	0.0024999	6.37834e-09
rs1860576	G	A	0.7417	0.004	0.0046	0.3845	0.0189343	G	A	0.641692	0.0150212	0.00235466	1.7787e-10
rs1861410	C	T	0.45	0.021	0.0037	1.381e-08	0.0242672	C	T	0.40117	0.0231436	0.00216976	1.46115e-26
rs1876334	G	A	0.7833	0.0126	0.0051	0.01349	0.0162734	G	A	0.77134	0.0152723	0.00266237	9.67309e-09
rs1896767	A	G	0.5	-0.0101	0.0037	0.006339	-0.0129648	A	G	0.493321	-0.0120076	0.00213869	1.97151e-08
rs1924923	A	G	0.4	-0.0069	0.0038	0.0694	-0.0159918	A	G	0.388642	-0.0129642	0.00219283	3.37791e-09
rs1927790	T	C	0.6583	-0.0153	0.0031	7.872e-07	-0.0145101	T	C	0.517173	-0.0148395	0.00200193	1.23851e-13
rs1928295	C	T	0.425	-0.0188	0.0031	7.91e-10	-0.0149365	C	T	0.511996	-0.0165468	0.00200133	1.36352e-16
rs1935353	C	T	0.5333	0.0103	0.0037	0.005373	0.0178183	C	T	0.499807	0.0153114	0.00213655	7.70024e-13
rs1937450	G	T	0.5	0.0086	0.0038	0.02363	0.0137266	G	T	0.568251	0.01205	0.00217311	2.93879e-08
rs1941213	A	C	0.6417	0.0156	0.0042	0.0002038	0.017389	A	C	0.734363	0.016794	0.00242217	4.10698e-12
rs1943477	T	C	0.0417	-0.0237	0.0066	0.000299	-0.025642	T	C	0.0688561	-0.0249031	0.00407107	9.52993e-10
rs1966265	A	G	0.2241	-0.0144	0.0056	0.01013	-0.0186831	A	G	0.217443	-0.0176395	0.0027643	1.75757e-10
rs1972812	G	A	0.3333	0.0101	0.0037	0.006339	0.0125306	G	A	0.524456	0.0117181	0.00213919	4.30598e-08
rs197870	G	A	0.9417	0.0141	0.0094	0.1336	0.0336725	G	A	0.947799	0.0280107	0.00505569	3.0171e-08
rs1978864	T	C	0.3583	0.0207	0.0042	8.283e-07	0.0140031	T	C	0.324309	0.0160624	0.002329	5.32336e-12
rs1979755	G	C	0.4667	-0.0188	0.0038	7.522e-07	-0.0124605	G	C	0.397976	-0.0145731	0.00219364	3.06641e-11
rs1982441	G	T	0.85	-0.0154	0.0054	0.004347	-0.0227193	G	T	0.814946	-0.0206702	0.0028572	4.6747e-13
rs1996401	G	T	0.6583	-0.0126	0.0037	0.0006607	-0.0150807	G	T	0.630405	-0.0142126	0.00218879	8.39543e-11
rs2010281	G	A	0.6333	0.0165	0.0031	1.425e-07	0.0128711	G	A	0.697703	0.0145343	0.00209868	4.34599e-12
rs2015729	G	A	0.6667	-0.014	0.0038	0.0002294	-0.0168055	G	A	0.657606	-0.0158382	0.00223128	1.26341e-12
rs2029566	T	G	0.1167	0.0247	0.0062	6.78e-05	0.0195348	T	G	0.0919466	0.0213408	0.00366616	5.84865e-09
rs2039334	T	A	0.8583	-0.0122	0.0038	0.00112	-0.0152208	T	A	0.777515	-0.0139905	0.0024251	7.97281e-09
rs2075650	A	G	0.8583	0.0258	0.0045	1.247e-08	0.0251044	A	G	0.826458	0.0253635	0.00274644	2.58136e-20
rs208015	T	C	0.075	0.0337	0.0072	2.861e-06	0.0289871	T	C	0.105865	0.0302072	0.00366335	1.64099e-16
rs2107118	G	A	0.4417	-0.0168	0.0047	0.0003509	-0.0130207	G	A	0.455913	-0.0139283	0.00230327	1.47384e-09
rs2112347	G	T	0.375	-0.0261	0.0031	6.191e-17	-0.0227783	G	T	0.413643	-0.0241888	0.0020201	4.8597e-33
rs2113426	G	A	0.6583	-0.0083	0.0041	0.04293	-0.0157676	G	A	0.681572	-0.0133802	0.00231823	7.84617e-09
rs2114824	G	A	0.475	0.0121	0.0037	0.001074	0.0170697	G	A	0.51593	0.0154012	0.00214389	6.78247e-13
rs2124499	G	C	0.6083	0.0144	0.0032	8.348e-06	0.00919863	G	C	0.643247	0.0113949	0.00207936	4.25366e-08
rs2143624	G	A	0.675	-0.0109	0.0032	0.0007796	-0.0120937	G	A	0.59294	-0.0116059	0.00204568	1.40031e-08
rs2145270	C	T	0.3833	-0.0157	0.0033	1.508e-06	-0.0119424	C	T	0.311827	-0.0135323	0.00214656	2.89709e-10
rs2155645	T	C	0.2667	-0.0157	0.0035	6.345e-06	-0.012663	T	C	0.302597	-0.0138765	0.00221243	3.56263e-10
rs2207139	G	A	0.1	0.0447	0.004	4.126e-29	0.0420373	G	A	0.202677	0.0430984	0.00252508	2.56257e-65
rs2226636	T	A	0.425	-0.0091	0.0043	0.03432	-0.0139722	T	A	0.458038	-0.0126361	0.00225179	2.00486e-08
rs2228213	G	A	0.6667	0.0159	0.0033	1.037e-06	0.014487	G	A	0.654037	0.0150664	0.0021132	1.00614e-12
rs2228273	A	G	0.05932	0.0231	0.0082	0.004846	0.0265519	A	G	0.0650331	0.0255314	0.00445847	1.02528e-08
rs2229992	T	C	0.4	0.0095	0.0038	0.01242	0.0149689	T	C	0.468277	0.0131937	0.00216501	1.10101e-09
rs2241423	A	G	0.2167	-0.031	0.0037	2.373e-17	-0.0287499	A	G	0.161489	-0.0298298	0.00256325	2.6572e-31
rs2245368	T	C	0.7583	-0.0317	0.0057	3.187e-08	-0.0375346	T	C	0.789146	-0.0361278	0.00279888	4.0601e-38
rs2246012	T	C	0.9	-0.018	0.0041	1.189e-05	-0.0155989	T	C	0.768856	-0.0164742	0.00247546	2.83278e-11
rs2256783	C	T	0.375	-0.0111	0.0031	0.0002656	-0.0110591	C	T	0.419842	-0.0110765	0.00201923	4.12323e-08
rs2267958	A	G	0.5417	-0.0186	0.0044	2.365e-05	-0.0155726	A	G	0.472663	-0.0163763	0.00226708	5.06532e-13
rs2272163	C	A	0.6917	0.0163	0.0041	7.02e-05	0.0126586	C	A	0.651711	0.0137912	0.00228662	1.62673e-09
rs2275003	G	A	0.45	-0.0112	0.0031	0.0002373	-0.0151249	G	A	0.535711	-0.0134902	0.00200063	1.55166e-11
rs2275426	A	G	0.3707	0.015	0.0032	2.956e-06	0.0117178	A	G	0.4214	0.0130586	0.00204526	1.71619e-10
rs2299383	C	T	0.675	-0.0104	0.0031	0.0006982	-0.0151147	C	T	0.533602	-0.0131434	0.00200452	5.49432e-11
rs2302737	C	T	0.575	-0.0099	0.004	0.01332	-0.0143028	C	T	0.618884	-0.0129264	0.0022365	7.48173e-09
rs2304130	G	A	0.125	-0.0267	0.0058	4.979e-06	-0.0244084	G	A	0.0585152	-0.0255102	0.00402177	2.25271e-10
rs2309817	A	T	0.5667	-0.01	0.0038	0.008499	-0.0195286	A	T	0.72453	-0.0159683	0.0023228	6.21662e-12
rs2316813	C	A	0.5833	0.0074	0.0033	0.02337	0.016005	C	A	0.562067	0.0126089	0.00207314	1.1868e-09
rs2322622	T	C	0.7	-0.0112	0.0031	0.0003462	-0.0127552	T	C	0.564411	-0.012102	0.00200899	1.7021e-09
rs2344185	C	T	0.4083	-0.0119	0.0038	0.001739	-0.0130182	C	T	0.414564	-0.0126493	0.00218257	6.80717e-09
rs2359133	C	G	0.65	0.0134	0.0041	0.001082	0.0144448	C	G	0.62837	0.0141249	0.00226883	4.79709e-10
rs2391518	C	T	0.7	-0.0161	0.0033	1.081e-06	-0.0180367	C	T	0.72797	-0.0171779	0.00219745	5.40048e-15
rs2414638	T	C	0.6833	-0.0117	0.004	0.003445	-0.013078	T	C	0.55118	-0.0126596	0.00220399	9.2486e-09
rs2436728	A	G	0.3833	0.0142	0.0037	0.0001241	0.0254747	A	G	0.570574	0.0216108	0.00216603	1.91895e-23
rs2465043	G	A	0.65	0.017	0.004	2.138e-05	0.014164	G	A	0.619645	0.0150538	0.0022406	1.83393e-11
rs2481665	C	T	0.4035	-0.0159	0.0031	1.903e-07	-0.0147172	C	T	0.368593	-0.015232	0.00204523	9.50493e-14
rs2512885	C	T	0.5833	0.0108	0.0031	0.0004831	0.0117089	C	T	0.538669	0.0113287	0.00200486	1.59854e-08
rs2528531	A	C	0.6833	-0.0185	0.004	3.746e-06	-0.0163469	A	C	0.732661	-0.0171093	0.00238024	6.57179e-13
rs2550739	T	C	0.05	0.0225	0.006	0.0001778	0.0183747	T	C	0.12153	0.0196503	0.00333636	3.86817e-09
rs2567302	G	A	0.2917	0.0092	0.0043	0.03239	0.018274	G	A	0.272038	0.0153857	0.002426	2.26803e-10
rs2579998	T	C	0.8833	0.0228	0.0061	0.0001857	0.0334973	T	C	0.881726	0.0302028	0.0033852	4.57816e-19
rs2588785	A	G	0.3167	-0.0227	0.0034	4.511e-11	-0.0183558	A	G	0.268068	-0.0202288	0.00223253	1.29326e-19
rs25996	C	G	0.4667	-0.0087	0.0038	0.02205	-0.0148082	C	G	0.495047	-0.0128368	0.00215882	2.74459e-09
rs2605603	A	G	0.4667	-0.0095	0.0031	0.001774	-0.0127507	A	G	0.51417	-0.0113973	0.00200028	1.21325e-08
rs2637629	G	A	0.325	0.0124	0.0041	0.002491	0.0145656	G	A	0.420048	0.0139253	0.00222933	4.19951e-10
rs2689765	C	T	0.775	0.0112	0.0047	0.01717	0.0141765	C	T	0.697122	0.0133731	0.00244177	4.33038e-08
rs2693528	C	G	0.575	-0.0113	0.0038	0.002942	-0.0148722	C	G	0.621241	-0.0136661	0.00220801	6.04108e-10
rs2710323	T	C	0.5667	-0.0128	0.0031	2.603e-05	-0.0131152	T	C	0.511752	-0.0129836	0.00200295	9.0361e-11
rs2718786	G	A	0.6333	-0.0146	0.0038	0.000122	-0.0125728	G	A	0.671134	-0.0132821	0.0022478	3.44319e-09
rs2726040	C	G	0.625	0.0182	0.0034	9.741e-08	0.0209797	C	G	0.647389	0.0198816	0.00213701	1.35974e-20
rs2734838	A	G	0.3417	0.0122	0.0031	0.0001003	0.0138872	A	G	0.475839	0.0131816	0.0020048	4.86582e-11
rs273512	T	C	0.4333	0.0085	0.004	0.03359	0.0140335	T	C	0.440628	0.0123537	0.0022039	2.07824e-08
rs273628	A	G	0.4833	0.0096	0.004	0.0164	0.0144732	A	G	0.46625	0.013008	0.00219334	3.01705e-09
rs2744974	C	T	0.7083	-0.0206	0.0034	1.101e-09	-0.0142939	C	T	0.668581	-0.0168313	0.0021567	5.98955e-15
rs2820315	T	C	0.2807	0.0202	0.0033	1.601e-09	0.0211687	T	C	0.286371	0.0207475	0.00217607	1.50751e-21
rs2835712	A	C	0.5083	-0.0093	0.0037	0.01195	-0.0143462	A	C	0.478297	-0.0126627	0.00213711	3.12035e-09
rs2836768	T	G	0.3917	-0.0178	0.0038	2.81e-06	-0.0165003	T	G	0.499215	-0.0169192	0.00215731	4.40837e-15
rs284227	C	T	0.3583	0.0143	0.0035	4.287e-05	0.0106842	C	T	0.334666	0.0120842	0.00217786	2.87866e-08
rs285575	A	G	0.5167	0.0154	0.0031	6.283e-07	0.0110059	A	G	0.482676	0.0128442	0.00200511	1.49634e-10
rs2881654	A	G	0.075	0.0239	0.0046	2.117e-07	0.0218844	A	G	0.170525	0.0226198	0.00277847	3.91753e-16
rs288232	C	T	0.875	0.0225	0.0049	4.394e-06	0.015573	C	T	0.789667	0.0176655	0.0026931	5.39752e-11
rs2944840	A	T	0.4667	-0.0132	0.004	0.0009668	-0.0123179	A	T	0.619187	-0.0125949	0.00224139	1.91817e-08
rs2959592	T	C	0.8333	0.0144	0.004	0.0002754	0.0170023	T	C	0.763087	0.0160317	0.00244282	5.28106e-11
rs2968487	T	C	0.275	0.0245	0.0037	2.76e-11	0.016211	T	C	0.248321	0.0195386	0.00234432	7.78648e-17
rs2972147	C	T	0.6	-0.0149	0.0031	2.022e-06	-0.0128099	C	T	0.640121	-0.0137223	0.00204815	2.08657e-11
rs2984618	T	G	0.4746	0.0169	0.0031	6.494e-08	0.00972425	T	G	0.365857	0.0128462	0.00204477	3.33182e-10
rs29941	A	G	0.3333	-0.0182	0.0033	2.407e-08	-0.0174402	A	G	0.390417	-0.0177429	0.00208278	1.61149e-17
rs3007105	T	C	0.3167	0.0121	0.0031	0.000105	0.0106264	T	C	0.350829	0.0112739	0.00205495	4.10626e-08
rs3095670	A	G	0.6167	-0.0196	0.0038	2.497e-07	-0.0167124	A	G	0.451811	-0.0176553	0.00217149	4.27442e-16
rs3101336	T	C	0.3509	-0.0334	0.0031	2.661e-26	-0.0286	T	C	0.355313	-0.0307059	0.00205332	1.46054e-50
rs3104804	C	T	0.025	0.0395	0.0159	0.01298	0.0261888	C	T	0.0945991	0.027186	0.00435195	4.188e-10
rs3127553	G	A	0.3667	0.023	0.0032	1.248e-12	0.0168738	G	A	0.372576	0.019433	0.00206825	5.67679e-21
rs323791	G	A	0.95	-0.0424	0.0124	0.0006277	-0.0448654	G	A	0.95278	-0.0443735	0.00553876	1.13356e-15
rs325299	C	T	0.75	0.0063	0.004	0.1153	0.0172328	C	T	0.65592	0.0136673	0.00228432	2.1896e-09
rs326889	T	C	0.4583	-0.0146	0.0038	0.000122	-0.0145634	T	C	0.328946	-0.0145762	0.00224769	8.87436e-11
rs329122	G	A	0.6333	0.0086	0.0031	0.005809	0.0129417	G	A	0.577628	0.0111043	0.00201669	3.66709e-08
rs33494	G	C	0.8417	-0.0148	0.0047	0.001639	-0.0160746	G	C	0.81127	-0.0156436	0.00273318	1.04306e-08
rs351784	G	C	0.1417	-0.0179	0.0057	0.001687	-0.0164289	G	C	0.162896	-0.016841	0.0030167	2.36976e-08
rs3736485	A	G	0.425	0.0176	0.0031	7.412e-09	0.0114804	A	G	0.412979	0.0140723	0.00201747	3.05436e-12
rs3752904	T	C	0.5583	-0.0119	0.0031	0.0001276	-0.0147403	T	C	0.496764	-0.0135567	0.00200117	1.24944e-11
rs3759558	A	G	0.15	0.0132	0.0052	0.01113	0.0192175	A	G	0.170229	0.0173528	0.00289469	2.03867e-09
rs3776726	T	A	0.8	0.0142	0.0047	0.002517	0.0216092	T	A	0.83105	0.0189576	0.00281166	1.5569e-11
rs3779273	A	G	0.4583	-0.0149	0.0031	1.522e-06	-0.0177419	A	G	0.407352	-0.0165321	0.0020226	2.99052e-16
rs3783890	C	T	0.1667	-0.0194	0.0039	7.59e-07	-0.0193788	C	T	0.197315	-0.0193876	0.00251553	1.28638e-14
rs3789220	A	G	0.0333	0.011	0.0099	0.2665	0.0288992	A	G	0.0822818	0.0254995	0.00431461	3.42058e-09
rs3800229	T	G	0.6917	0.0183	0.0033	3.577e-08	0.0211523	T	G	0.642011	0.0199916	0.00210508	2.16343e-21
rs3807875	G	A	0.35	0.011	0.0033	0.0007996	0.0128973	G	A	0.41498	0.0121497	0.00207151	4.48756e-09
rs3808434	A	G	0.3417	0.012	0.0031	8.796e-05	0.0131957	A	G	0.338782	0.0126626	0.00206991	9.50646e-10
rs3810291	A	G	0.625	0.0283	0.0036	4.812e-15	0.0191543	A	G	0.634605	0.0224712	0.002168	3.57964e-25
rs3817334	C	T	0.55	-0.0262	0.0031	5.145e-17	-0.0206147	C	T	0.603633	-0.0230025	0.00202691	7.54264e-30
rs3819162	C	T	0.8583	-0.0178	0.0057	0.001791	-0.0191343	C	T	0.820844	-0.0187819	0.00292951	1.44319e-10
rs383349	A	G	0.4833	0.0102	0.0037	0.005838	0.0143859	A	G	0.492955	0.0129885	0.00213781	1.23518e-09
rs3849570	A	C	0.3667	0.0188	0.0034	2.601e-08	0.00765821	A	C	0.416929	0.0118862	0.00209445	1.38602e-08
rs3888190	A	C	0.3583	0.0309	0.0031	3.14e-23	0.0333753	A	C	0.413013	0.0323236	0.0020207	1.35742e-57
rs3935370	G	A	0.5667	-0.0135	0.004	0.0007382	-0.0116234	G	A	0.592985	-0.0122011	0.00221938	3.85133e-08
rs39654	G	A	0.55	0.0156	0.0038	4.039e-05	0.0143942	G	A	0.600282	0.0147942	0.0021887	1.38595e-11
rs40245	T	A	0.6917	-0.009	0.004	0.02445	-0.0156971	T	A	0.630629	-0.013577	0.00225057	1.61233e-09
rs4061073	G	A	0.3167	0.0146	0.0034	1.707e-05	0.0116319	G	A	0.282747	0.0128883	0.00221214	5.67039e-09
rs4132610	C	T	0.3667	-0.0076	0.0038	0.0455	-0.0147638	C	T	0.35679	-0.0123255	0.00221697	2.7038e-08
rs426101	G	A	0.1667	-0.0135	0.0054	0.01242	-0.0181512	G	A	0.17037	-0.0167818	0.00293008	1.01968e-08
rs4273371	C	T	0.5167	0.0117	0.0031	0.0001281	0.0121072	C	T	0.514085	0.0119378	0.00199917	2.35237e-09
rs427943	C	A	0.6083	0.0181	0.0036	3.939e-07	0.0138117	C	A	0.58352	0.0153207	0.00213553	7.27285e-13
rs4319547	G	A	0.7417	0.0169	0.0035	1.281e-06	0.0177061	G	A	0.793997	0.0173347	0.00237584	2.9598e-13
rs4342589	A	G	0.4417	-0.0168	0.0038	9.822e-06	-0.0114316	A	G	0.372185	-0.0132407	0.00220591	1.94468e-09
rs4382144	G	A	0.3833	0.0116	0.0031	0.000188	0.0165297	G	A	0.396949	0.0144241	0.00202599	1.08273e-12
rs4414033	G	A	0.4569	-0.016	0.0042	0.0001392	-0.0147465	G	A	0.428147	-0.0151038	0.0022425	1.63635e-11
rs4432271	C	T	0.1833	-0.0275	0.0056	9.075e-07	-0.0243459	C	T	0.199798	-0.0251513	0.00282976	6.21396e-19
rs4456769	T	C	0.3667	0.0098	0.004	0.01429	0.0184759	T	C	0.343715	0.0156787	0.00227126	5.08909e-12
rs4528842	C	T	0.6083	0.0078	0.0042	0.06329	0.0146923	C	T	0.592017	0.0127027	0.00225659	1.81101e-08
rs4541689	G	A	0.425	-0.0124	0.004	0.001935	-0.0121435	G	A	0.493718	-0.0122205	0.00219225	2.48325e-08
rs4541737	T	C	0.1167	-0.0106	0.0055	0.05171	-0.0204279	T	C	0.180965	-0.0176903	0.0029028	1.0997e-09
rs456798	T	G	0.4333	-0.0034	0.0038	0.3709	-0.0172609	T	G	0.441884	-0.0126916	0.00218179	5.989e-09
rs4596023	A	G	0.3083	-0.0127	0.0035	0.0002844	-0.0137821	A	G	0.260548	-0.0133238	0.00227789	4.94036e-09
rs4639270	T	C	0.5083	-0.0092	0.0037	0.0129	-0.0133594	T	C	0.555268	-0.0119561	0.00214913	2.64821e-08
rs4662565	C	A	0.6917	0.0102	0.0041	0.01285	0.0151227	C	A	0.638827	0.0136054	0.00227623	2.27057e-09
rs4715291	T	C	0.0083	-0.0018	0.014	0.8977	-0.0347754	T	C	0.0641837	-0.0305474	0.00501306	1.10432e-09
rs4738873	A	G	0.1583	0.0199	0.004	5.251e-07	0.0148454	A	G	0.328394	0.0165044	0.00229159	5.92676e-13
rs4740619	T	C	0.5333	0.0179	0.0031	4.564e-09	0.0199782	T	C	0.489511	0.0191108	0.00200279	1.39984e-21
rs4743281	C	T	0.35	0.0097	0.004	0.01531	0.0173778	C	T	0.430071	0.015044	0.00220534	9.00346e-12
rs4755217	A	G	0.5167	0.0077	0.0031	0.01309	0.0143748	A	G	0.554702	0.0115663	0.00201084	8.81921e-09
rs4771122	A	G	0.7417	-0.0274	0.0046	2.577e-09	-0.0183839	A	G	0.65992	-0.0207868	0.00237475	2.07259e-18
rs4788671	C	T	0.475	0.0132	0.0036	0.0002695	0.0117867	C	T	0.429131	0.0122865	0.0021408	9.51252e-09
rs4806814	G	A	0.7833	0.0197	0.0052	0.0001516	0.018087	G	A	0.81933	0.0185732	0.00285499	7.74237e-11
rs4813427	T	A	0.1167	0.0245	0.0062	7.763e-05	0.0257008	T	A	0.0658634	0.0251949	0.00402415	3.82695e-10
rs4820408	T	G	0.3333	0.015	0.0032	3.648e-06	0.0163032	T	G	0.398406	0.015768	0.00205079	1.48603e-14
rs4833079	C	T	0.3667	-0.0137	0.0031	1.176e-05	-0.0142556	C	T	0.473539	-0.0140235	0.00200362	2.57631e-12
rs4847370	C	T	0.06364	0.0163	0.005	0.001112	0.0188935	C	T	0.117954	0.0178637	0.00315064	1.42902e-08
rs4858523	G	A	0.03333	-0.017	0.0189	0.3684	-0.0312202	G	A	0.0598943	-0.030091	0.00532599	1.60601e-08
rs4860528	C	T	0.325	0.01	0.0041	0.01473	0.0145222	C	T	0.401035	0.01317	0.002242	4.2487e-09
rs4869417	C	T	0.725	0.013	0.0034	0.0001091	0.0195726	C	T	0.639337	0.0169904	0.0021311	1.55372e-15
rs487152	C	A	0.4417	-0.0152	0.0031	8.817e-07	-0.0150941	C	A	0.504182	-0.0151383	0.00200296	4.09469e-14
rs4912652	T	C	0.5583	-0.0146	0.0038	0.000122	-0.0121149	T	C	0.609868	-0.0129462	0.00219786	3.85322e-09
rs492400	T	C	0.675	-0.0158	0.0031	4.167e-07	-0.0133959	T	C	0.573859	-0.014411	0.00201439	8.42668e-13
rs4929923	C	T	0.7167	0.0203	0.0032	3.625e-10	0.0129564	C	T	0.646857	0.0160593	0.00208008	1.1585e-14
rs4971010	A	G	0.3	-0.0118	0.0038	0.001901	-0.0183031	A	G	0.376396	-0.0160941	0.00221473	3.67971e-13
rs4980661	A	G	0.525	-0.0128	0.0041	0.001797	-0.0150416	A	G	0.40389	-0.0143744	0.00223676	1.30616e-10
rs4984406	T	C	0.5083	0.0159	0.0031	1.792e-07	0.00799662	T	C	0.595246	0.0113609	0.00202255	1.94193e-08
rs4985155	A	G	0.6833	0.0149	0.0033	4.777e-06	0.0150073	A	G	0.65855	0.014963	0.00212055	1.71145e-12
rs4986044	C	T	0.5667	0.0164	0.0031	1.416e-07	0.0109503	C	T	0.499377	0.0132156	0.00199864	3.78465e-11
rs507929	G	A	0.475	-0.0044	0.0037	0.2344	-0.0171923	G	A	0.453338	-0.0128894	0.0021459	1.89548e-09
rs519844	C	T	0.15	0.0128	0.0061	0.03587	0.0240685	C	T	0.104163	0.0203337	0.0035118	7.0344e-09
rs543874	G	A	0.2667	0.0482	0.0039	2.618e-35	0.0421668	G	A	0.17995	0.0447798	0.00256661	3.62469e-68
rs555267	T	G	0.3083	0.0161	0.0033	1.089e-06	0.0134932	T	G	0.306478	0.0146039	0.00215404	1.20378e-11
rs6024460	A	G	0.75	0.0159	0.0047	0.000717	0.0157419	A	G	0.817277	0.0157959	0.00274717	8.93066e-09
rs6142096	A	G	0.5417	0.0147	0.0037	7.098e-05	0.0118889	A	G	0.560407	0.0128369	0.00214861	2.30823e-09
rs615632	T	C	0.5667	-0.014	0.0033	1.936e-05	-0.0117574	T	C	0.461672	-0.0126342	0.00206337	9.17876e-10
rs620985	G	A	0.6333	0.012	0.0031	0.0001067	0.0125921	G	A	0.522087	0.0123451	0.00200238	7.03936e-10
rs621042	A	C	0.475	-0.0152	0.0038	6.334e-05	-0.010253	A	C	0.463332	-0.0118575	0.00216413	4.27454e-08
rs6419734	T	C	0.1583	0.0173	0.0053	0.001098	0.0180513	T	C	0.136377	0.0177937	0.00310328	9.81818e-09
rs6439664	G	A	0.4138	-0.0155	0.0036	1.6e-05	-0.0177577	G	A	0.310808	-0.0168952	0.00222511	3.12654e-14
rs6448733	G	A	0.4	0.0113	0.004	0.004728	0.0136484	G	A	0.336897	0.0128788	0.00228983	1.86206e-08
rs645040	G	T	0.2333	-0.0167	0.0038	1.035e-05	-0.0174707	G	T	0.149811	-0.0170976	0.00264394	1.00164e-10
rs6469351	T	C	0.75	0.0153	0.004	0.0001308	0.012863	T	C	0.653411	0.0136503	0.0022736	1.92687e-09
rs6477694	C	T	0.3583	0.0174	0.0031	2.673e-08	0.0068752	C	T	0.400406	0.0113771	0.00202746	2.00583e-08
rs6494634	C	T	0.6667	-0.01	0.0033	0.00276	-0.0141487	C	T	0.588366	-0.0125152	0.00207069	1.50342e-09
rs6495366	C	T	0.6167	0.0119	0.0038	0.001739	0.0120315	C	T	0.601297	0.011988	0.00218656	4.19205e-08
rs657261	A	G	0.0917	-0.0212	0.0073	0.003683	-0.02597	A	G	0.0931462	-0.024651	0.00383875	1.34834e-10
rs6574961	T	C	0.2917	0.0122	0.0036	0.0007364	0.0146122	T	C	0.228037	0.0135747	0.00236091	8.93554e-09
rs6597650	G	A	0.4333	0.0124	0.0041	0.002491	0.0208798	G	A	0.43932	0.0183984	0.00221788	1.08146e-16
rs6601541	C	T	0.4167	-0.0079	0.0033	0.01831	-0.0180473	C	T	0.333257	-0.0138017	0.00213455	1.00717e-10
rs6607336	A	C	0.7167	0.0165	0.0041	5.712e-05	0.0139697	A	C	0.755902	0.01487	0.00244566	1.20059e-09
rs663129	A	G	0.2833	0.0557	0.0036	8.801e-53	0.0533158	A	G	0.185386	0.0544266	0.00245727	1.06081e-108
rs6676190	C	T	0.3559	0.0156	0.0033	3.165e-06	0.0194989	C	T	0.317039	0.0178581	0.00214077	7.30953e-17
rs6677968	G	A	0.4583	-0.0118	0.0031	0.0001506	-0.0111539	G	A	0.47286	-0.0114234	0.00200211	1.15874e-08
rs6716536	C	T	0.775	0.0176	0.004	1.368e-05	0.0239033	C	T	0.669097	0.0218006	0.00231027	3.8579e-21
rs6730157	A	G	0.7417	0.016	0.0034	3.403e-06	0.0218186	A	G	0.594827	0.019571	0.00211316	2.01633e-20
rs6766759	A	C	0.5667	0.0124	0.0031	5.186e-05	0.0107564	A	C	0.541343	0.0114457	0.0020076	1.18966e-08
rs6768819	C	T	0.3833	0.011	0.0031	0.0004564	0.0119774	C	T	0.373341	0.0115537	0.00204096	1.50561e-08
rs6787363	A	G	0.425	0.0108	0.0038	0.004482	0.0159948	A	G	0.308826	0.0141292	0.00227722	5.48402e-10
rs681119	C	T	0.45	0.0096	0.0031	0.001717	0.0153731	C	T	0.414648	0.0129212	0.00202027	1.5972e-10
rs6841761	T	G	0.5167	-0.0128	0.0031	2.58e-05	-0.0142994	T	G	0.608527	-0.0136561	0.0020305	1.75003e-11
rs6864049	A	G	0.5667	-0.0158	0.0031	3.62e-07	-0.0125406	A	G	0.420241	-0.0139312	0.00202488	5.98401e-12
rs6870983	T	C	0.175	-0.0184	0.0036	4.21e-07	-0.0254729	T	C	0.187699	-0.0221794	0.0024566	1.74095e-19
rs6890277	G	A	0.4167	0.0193	0.0038	3.795e-07	0.0184832	G	A	0.428073	0.0187515	0.00217787	7.305e-18
rs6907086	A	T	0.8583	-0.0165	0.0038	1.673e-05	-0.0183741	A	T	0.772562	-0.0176119	0.00242331	3.65572e-13
rs6970887	T	C	0.225	0.0136	0.0035	0.0001029	0.0213047	T	C	0.252606	0.0180226	0.00228437	3.03299e-15
rs7009799	T	C	0.3833	-0.0121	0.004	0.002486	-0.0181968	T	C	0.418954	-0.0163292	0.00221386	1.63234e-13
rs7031788	C	T	0.1917	-0.0096	0.0043	0.02558	-0.0152037	C	T	0.302667	-0.0134948	0.00237459	1.32358e-08
rs7038036	T	G	0.525	0.0127	0.0038	0.0008315	0.0138705	T	G	0.48821	0.0134939	0.00215535	3.8331e-10
rs7045925	T	C	0.3167	0.0129	0.0034	0.000159	0.0158832	T	C	0.308093	0.0146552	0.00218138	1.83837e-11
rs7072873	T	C	0.5417	-0.0083	0.0038	0.02895	-0.015108	T	C	0.514561	-0.0129168	0.00215582	2.07765e-09
rs7098825	T	C	0.9333	-0.0265	0.0054	1.037e-06	-0.0242437	T	C	0.896125	-0.0251157	0.00335696	7.3389e-14
rs7102454	C	T	0.3833	0.0097	0.004	0.01531	0.020643	C	T	0.288314	0.0168843	0.00234427	5.91716e-13
rs7116641	G	T	0.2667	0.0171	0.0033	3.437e-07	0.0102213	G	T	0.310961	0.0131325	0.00214681	9.524e-10
rs7117404	G	A	0.1917	0.0146	0.0044	0.0008915	0.025491	G	A	0.146736	0.0209449	0.00284275	1.7342e-13
rs7122268	A	T	0.5667	-0.0105	0.0038	0.005725	-0.0152365	A	T	0.499427	-0.0137053	0.00216056	2.24735e-10
rs7123876	T	C	0.7417	-0.0145	0.0035	3.39e-05	-0.0130285	T	C	0.610507	-0.0135754	0.00213383	1.99148e-10
rs7124275	C	T	0.35	-0.0077	0.004	0.05423	-0.0170628	C	T	0.319388	-0.0139595	0.00230286	1.3458e-09
rs7138383	G	A	0.775	0.0179	0.0043	3.144e-05	0.016677	G	A	0.690423	0.0170477	0.00236726	5.95836e-13
rs7138803	G	A	0.5583	-0.0315	0.0031	8.153e-24	-0.0264462	G	A	0.616268	-0.0286257	0.00203578	6.56768e-45
rs7141420	T	C	0.6167	0.0235	0.0031	1.23e-14	0.02585	T	C	0.588911	0.0248541	0.00201807	7.44891e-35
rs714393	C	T	0.5833	0.008	0.0038	0.03527	0.0144274	C	T	0.560996	0.0123254	0.00217309	1.41265e-08
rs7143963	T	C	0.1333	0.0204	0.004	2.82e-07	0.015402	T	C	0.224145	0.0173066	0.00246927	2.40349e-12
rs7161194	A	G	0.3583	0.017	0.004	2.467e-05	0.0154263	A	G	0.307904	0.0159641	0.00233829	8.65582e-12
rs7163790	C	T	0.6083	-0.0104	0.0038	0.006203	-0.0150215	C	T	0.583161	-0.0135013	0.00217941	5.83052e-10
rs7164727	T	C	0.775	0.018	0.0033	6.829e-08	0.0120203	T	C	0.682574	0.0145378	0.0021412	1.12478e-11
rs7185735	G	A	0.4417	0.0779	0.0031	7.77e-139	0.0867522	G	A	0.403693	0.0829809	0.00202339	0
rs7200589	G	A	0.7583	0.0156	0.0044	0.0003919	0.0161173	G	A	0.774811	0.0159421	0.00256058	4.78589e-10
rs7226371	G	A	0.15	0.0206	0.0043	2.066e-06	0.0234277	G	A	0.17387	0.0223191	0.00269241	1.13591e-16
rs7235205	G	A	0.2917	0.0137	0.0034	5.682e-05	0.0130768	G	A	0.385405	0.0133177	0.0021139	2.97525e-10
rs7239114	A	G	0.5417	0.0127	0.0033	9.776e-05	0.0116019	A	G	0.53585	0.0120287	0.00205726	5.00724e-09
rs7239575	C	T	0.5167	-0.0201	0.0037	5.559e-08	-0.0204713	C	T	0.493176	-0.0203474	0.00213692	1.70128e-21
rs7240718	T	C	0.1417	-0.0124	0.0054	0.02166	-0.0228014	T	C	0.114664	-0.018987	0.00327012	6.39063e-09
rs7243357	G	T	0.1333	-0.0217	0.004	3.857e-08	-0.0176849	G	T	0.268273	-0.0191091	0.00238232	1.04709e-15
rs7317857	A	G	0.2333	0.0108	0.0038	0.004773	0.0160429	A	G	0.190266	0.013766	0.00250419	3.85884e-08
rs7318817	C	T	0.3583	0.0194	0.0038	3.303e-07	0.0156058	C	T	0.390893	0.0168684	0.00219207	1.41289e-14
rs732729	T	A	0.8667	0.0174	0.0056	0.001889	0.0183598	T	A	0.818086	0.0181003	0.00291166	5.0834e-10
rs733594	T	C	0.75	0.0179	0.0035	2.672e-07	0.0126555	T	C	0.726419	0.0148336	0.00225555	4.81747e-11
rs738140	G	A	0.25	-0.0091	0.004	0.02291	-0.0175079	G	A	0.322926	-0.0147468	0.0022922	1.24716e-10
rs7430139	A	G	0.825	0.0189	0.0052	0.0002784	0.0145931	A	G	0.781725	0.0157656	0.00271318	6.21948e-09
rs7485577	A	G	0.2667	0.0118	0.0042	0.004961	0.0211533	A	G	0.286414	0.0181187	0.00239231	3.62648e-14
rs7492628	G	C	0.325	-0.0113	0.0042	0.007135	-0.0147024	G	C	0.280435	-0.0135959	0.00239512	1.3746e-08
rs758278	G	A	0.5917	0.0122	0.0038	0.001325	0.0137077	G	A	0.597939	0.013208	0.00218765	1.56503e-09
rs7587034	C	T	0.3833	0.0133	0.004	0.0008842	0.0142892	C	T	0.396856	0.0139827	0.00222646	3.38051e-10
rs758747	C	T	0.7333	-0.0225	0.0037	7.473e-10	-0.0156162	C	T	0.7929	-0.0186016	0.00243661	2.27239e-14
rs7596956	T	C	0.8417	0.0185	0.0048	0.0001161	0.0164476	T	C	0.870334	0.0172663	0.00303159	1.23038e-08
rs7599312	G	A	0.7083	0.022	0.0034	1.173e-10	0.0198695	G	A	0.695827	0.0207526	0.00218895	2.52789e-21
rs7601692	T	G	0.4917	0.0112	0.0031	0.0002288	0.0110545	T	G	0.433821	0.011116	0.00201513	3.46286e-08
rs7605556	G	T	0.5083	0.0141	0.0038	0.0002068	0.0126785	G	T	0.566485	0.0131437	0.00217392	1.48395e-09
rs7622739	G	A	0.4083	0.0078	0.0047	0.097	0.0146407	G	A	0.375069	0.0129151	0.0023606	4.47254e-08
rs763464	T	C	0.65	-0.0138	0.0033	3.384e-05	-0.01226	T	C	0.733747	-0.0129497	0.00220836	4.52023e-09
rs7639882	C	T	0.7	-0.0076	0.0041	0.06379	-0.0154743	C	T	0.701965	-0.0128913	0.00234823	4.02444e-08
rs7647305	T	C	0.1833	-0.0358	0.0038	1.349e-20	-0.0296239	T	C	0.182455	-0.0323718	0.00253469	2.36513e-37
rs7651039	C	T	0.5	0.0076	0.0031	0.01393	0.0138337	C	T	0.504435	0.0112279	0.0020043	2.12044e-08
rs7663212	G	A	0.275	-0.0125	0.0035	0.0003876	-0.0144864	G	A	0.236933	-0.0136181	0.00231404	3.9806e-09
rs767278	C	G	0.1583	-0.018	0.0058	0.001913	-0.0161072	C	G	0.208751	-0.0165552	0.00282157	4.42821e-09
rs7683987	T	A	0.4583	0.0095	0.004	0.01755	0.0144949	T	A	0.390152	0.0129398	0.00223191	6.72544e-09
rs7716275	T	G	0.2083	-0.015	0.004	0.0001527	-0.0135373	T	G	0.182117	-0.0141506	0.00259001	4.66804e-08
rs7733438	G	T	0.1417	0.0195	0.0056	0.0004974	0.0223964	G	T	0.121142	0.0214121	0.00326448	5.4121e-11
rs7748777	A	G	0.4667	0.0137	0.0031	1.078e-05	0.0117208	A	G	0.439992	0.0125544	0.00201181	4.3664e-10
rs7751957	C	G	0.8417	0.0115	0.0039	0.003502	0.0188695	C	G	0.767135	0.0160128	0.00242817	4.26448e-11
rs7760082	A	G	0.625	-0.0124	0.004	0.001935	-0.0126849	A	G	0.64821	-0.0125935	0.00226539	2.71168e-08
rs7775754	C	G	0.625	0.0177	0.004	9.644e-06	0.0136355	C	G	0.604261	0.0148964	0.00222786	2.28745e-11
rs7779181	T	C	0.8	-0.0186	0.0044	2.365e-05	-0.0146668	T	C	0.821445	-0.0161485	0.0027006	2.23688e-09
rs7810260	G	A	0.5	-0.0105	0.0038	0.005725	-0.0136177	G	A	0.564701	-0.0126016	0.00216935	6.28748e-09
rs7815140	G	C	0.4333	0.0135	0.0037	0.0002636	0.0140974	G	C	0.372907	0.0138888	0.00218629	2.1159e-10
rs7816188	G	A	0.6583	0.0064	0.004	0.1096	0.0223053	G	A	0.66012	0.0171427	0.00227889	5.37941e-14
rs7837587	C	T	0.4917	0.0089	0.0032	0.004734	0.0141053	C	T	0.568779	0.0119774	0.00204601	4.79861e-09
rs7899106	A	G	0.95	-0.0395	0.0071	2.96e-08	-0.0311293	A	G	0.955727	-0.0348593	0.00473948	1.90812e-13
rs7903146	T	C	0.25	-0.0234	0.0034	1.112e-11	-0.0173984	T	C	0.200925	-0.0202863	0.00235852	7.88212e-18
rs7969633	T	C	0.7167	-0.0129	0.0036	0.0002681	-0.017596	T	C	0.811585	-0.0153942	0.00246507	4.23986e-10
rs7970953	G	A	0.7583	-0.0151	0.0033	6.19e-06	-0.0103303	G	A	0.696887	-0.0123734	0.00215981	1.01061e-08
rs7996851	A	G	0.4333	-0.0101	0.0038	0.007863	-0.0129523	A	G	0.481983	-0.0120319	0.00215857	2.48926e-08
rs8060484	G	T	0.7	-0.0092	0.0042	0.02849	-0.0206993	G	T	0.704921	-0.0170094	0.00237914	8.71637e-13
rs8069296	C	T	0.1833	0.0123	0.0039	0.001518	0.0145999	C	T	0.221862	0.013692	0.00245039	2.30126e-08
rs8079215	T	C	0.725	0.0117	0.0042	0.005341	0.0177489	T	C	0.756326	0.0156583	0.00246912	2.27275e-10
rs8092503	G	A	0.225	0.0144	0.0036	5.76e-05	0.0130248	G	A	0.335734	0.0135366	0.0021962	7.10907e-10
rs8096568	C	G	0.2833	0.0128	0.004	0.001374	0.0223311	C	G	0.385844	0.019362	0.00223256	4.22557e-18
rs8097783	A	G	0.1167	-0.0398	0.006	4.195e-11	-0.0367581	A	G	0.0412794	-0.0384222	0.00443777	4.80176e-18
rs810364	T	C	0.7833	-0.0121	0.0044	0.00596	-0.0173131	T	C	0.765204	-0.0155806	0.00253653	8.1241e-10
rs8113277	G	A	0.1	-0.0277	0.0073	0.0001479	-0.0259377	G	A	0.0643727	-0.0265621	0.00434541	9.79621e-10
rs8123881	G	A	0.1417	0.0228	0.0045	4.267e-07	0.0158523	G	A	0.234099	0.0180796	0.00254792	1.28561e-12
rs818902	C	A	0.2583	0.0157	0.0033	2.612e-06	0.00982079	C	A	0.264044	0.0124602	0.00221109	1.74745e-08
rs8192675	C	T	0.2667	0.0124	0.0034	0.0002183	0.0141623	C	T	0.264666	0.0134019	0.00223343	1.9663e-09
rs823094	T	G	0.4833	0.0136	0.0031	1.126e-05	0.0125341	T	G	0.557213	0.0129817	0.0020088	1.03048e-10
rs852056	C	T	0.75	-0.0128	0.0043	0.002913	-0.0174389	C	T	0.765829	-0.0158605	0.00250827	2.56096e-10
rs866050	G	A	0.175	-0.0097	0.0047	0.03903	-0.0188036	G	A	0.227857	-0.0160159	0.00260082	7.3656e-10
rs867559	G	A	0.175	0.02	0.0038	1.612e-07	0.021672	G	A	0.33177	0.021086	0.00224966	7.05259e-21
rs879620	C	T	0.4083	-0.0244	0.004	1.061e-09	-0.025255	C	T	0.419514	-0.0249929	0.00221459	1.54649e-29
rs889398	T	C	0.4417	-0.0156	0.0031	5.472e-07	-0.0146604	T	C	0.425183	-0.0150595	0.00202044	9.08375e-14
rs893006	A	C	0.75	0.0145	0.0033	1.42e-05	0.0186972	A	C	0.604544	0.0170271	0.00208163	2.84583e-16
rs895330	C	G	0.8333	0.0186	0.0053	0.0004491	0.017163	C	G	0.836073	0.0176071	0.00294622	2.28485e-09
rs897959	C	T	0.3	0.0139	0.004	0.0005109	0.0126709	C	T	0.388543	0.0130531	0.00223068	4.86767e-09
rs905938	C	T	0.325	0.0143	0.0037	9.782e-05	0.0179982	C	T	0.234614	0.0164758	0.00237395	3.91466e-12
rs914187	T	C	0.4083	-0.0135	0.0031	1.417e-05	-0.0140246	T	C	0.466379	-0.0138055	0.00200327	5.52043e-12
rs916389	A	G	0.2417	-0.0148	0.0049	0.002524	-0.0184857	A	G	0.143907	-0.0171257	0.00297647	8.73047e-09
rs925018	C	G	0.6333	-0.0117	0.0033	0.0003615	-0.0169972	C	G	0.734187	-0.0146308	0.00220564	3.28161e-11
rs9275418	G	A	0.3083	-0.0133	0.0034	0.0001028	-0.0168656	G	A	0.428286	-0.0155122	0.00209475	1.30917e-13
rs9309664	A	G	0.55	-0.0114	0.0038	0.0027	-0.0136387	A	G	0.585977	-0.0129018	0.00218012	3.2598e-09
rs9313052	C	G	0.5417	0.0129	0.0038	0.0006869	0.0116225	C	G	0.579214	0.0120414	0.00217595	3.13291e-08
rs9380215	A	G	0.0667	-0.0221	0.0059	0.0001587	-0.0207165	A	G	0.0830074	-0.0212592	0.00369535	8.76909e-09
rs9463594	G	A	0.0583	0.0321	0.0068	2.177e-06	0.0260732	G	A	0.0622166	0.0284136	0.00423751	2.01045e-11
rs9512706	A	C	0.275	-0.0095	0.004	0.01755	-0.0146241	A	C	0.310987	-0.0129147	0.00231033	2.27112e-08
rs9517337	C	A	0.4917	-0.0071	0.0037	0.05499	-0.0153441	C	A	0.537113	-0.0125812	0.00214198	4.26379e-09
rs9538229	A	C	0.4833	-0.0055	0.0037	0.1372	-0.0168662	A	C	0.446139	-0.0130374	0.00214747	1.27088e-09
rs954018	G	A	0.75	0.0129	0.0033	0.0001018	0.0109274	G	A	0.639954	0.0117284	0.00210287	2.44245e-08
rs9549099	C	T	0.2167	0.0123	0.0042	0.003405	0.0188168	C	T	0.325069	0.0168151	0.00232771	5.05151e-13
rs9563576	C	T	0.7917	0.0179	0.0039	5.435e-06	0.0237488	C	T	0.80041	0.0213276	0.00250928	1.90471e-17
rs9595908	T	C	0.6583	0.0141	0.0031	6.035e-06	0.0106572	T	C	0.571097	0.0121067	0.0020115	1.75764e-09
rs9633835	A	G	0.2917	-0.0179	0.004	7.641e-06	-0.0123477	A	G	0.397159	-0.0140681	0.0022266	2.6459e-10
rs964917	T	C	0.3833	-0.0164	0.0038	1.59e-05	-0.011401	T	C	0.468653	-0.0130169	0.00216047	1.69087e-09
rs9652638	C	T	0.4	0.0102	0.0038	0.00727	0.0135943	C	T	0.480062	0.0124956	0.00216198	7.48381e-09
rs972540	A	G	0.7083	-0.0178	0.0034	2.277e-07	-0.0157556	A	G	0.778291	-0.0167042	0.00231602	5.49423e-13
rs977799	A	G	0.2917	-0.0112	0.0033	0.0007503	-0.0165461	A	G	0.429523	-0.0144442	0.00206918	2.93803e-12
rs980183	G	A	0.375	0.0185	0.0038	1.125e-06	0.016997	G	A	0.389917	0.0174986	0.00219523	1.57147e-15
rs980329	T	C	0.725	-0.0154	0.0044	0.0004653	-0.0167758	T	C	0.752822	-0.0163316	0.0025001	6.47278e-11
rs9824987	C	T	0.85	0.019	0.0057	0.0008581	0.0235825	C	T	0.831386	0.0223257	0.00298504	7.47754e-14
rs9831758	T	G	0.8833	-0.0123	0.0053	0.0203	-0.0217401	T	G	0.88728	-0.0181479	0.00326942	2.84377e-08
rs9843336	A	G	0.125	0.0225	0.0077	0.003477	0.0322273	A	G	0.0450204	0.028315	0.00488326	6.69593e-09
rs9845966	G	T	0.5583	-0.0108	0.0032	0.0006573	-0.0114599	G	T	0.488638	-0.0111947	0.00202869	3.42523e-08
rs9856151	G	A	0.7333	-0.0165	0.0034	1.595e-06	-0.0204135	G	A	0.736641	-0.018715	0.00223992	6.53262e-17
rs9900011	G	C	0.0417	-0.0068	0.0128	0.5952	-0.0380048	G	C	0.0467958	-0.0317875	0.00571347	2.64257e-08
rs9904177	G	A	0.2667	0.011	0.0043	0.01052	0.0172074	G	A	0.288457	0.0152793	0.00239649	1.82119e-10
rs9906903	C	T	0.7	0.0203	0.0043	2.348e-06	0.0108955	C	T	0.78457	0.014228	0.00255966	2.7206e-08
rs9910424	T	C	0.55	-0.011	0.0031	0.0003269	-0.0109872	T	C	0.576058	-0.0109926	0.00201454	4.85256e-08
rs9914578	G	C	0.1667	0.0201	0.0038	8.99e-08	0.0116282	G	C	0.242162	0.0149542	0.00238098	3.37077e-10
rs9921416	T	C	0.4333	-0.0099	0.004	0.01332	-0.0182398	T	C	0.475817	-0.0157246	0.00219669	8.16837e-13
rs9923491	T	G	0.2833	0.0114	0.0042	0.006642	0.0161238	T	G	0.284179	0.0145928	0.00239103	1.03981e-09
rs9925964	G	A	0.3917	-0.0192	0.0031	8.108e-10	-0.0107984	G	A	0.383579	-0.0144209	0.00203557	1.39592e-12
rs9931018	C	T	0.725	-0.0098	0.0039	0.01101	-0.0293753	C	T	0.844792	-0.0203263	0.00265162	1.77995e-14
rs9951687	G	C	0.1271	-0.0063	0.007	0.3681	-0.0219595	G	C	0.157406	-0.0186712	0.00320771	5.85944e-09
rs995258	C	A	0.4667	-0.0174	0.0038	4.673e-06	-0.011381	C	A	0.446771	-0.0133315	0.00216317	7.14064e-10

## Sheet: ST.2
HARMONIZED BMI-T2D DATA WITH CLUSTERING RESULTS
SNP	effect_allele.exposure	other_allele.exposure	effect_allele.outcome	other_allele.outcome	beta.exposure	beta.outcome	se.outcome	pval.outcome	outcome	se.exposure	pval.exposure	exposure	mr_keep	Cluster_allocated	Cluster_probability
rs1000940	G	A	G	A	0.0166929	0.019	0.0089	0.033	T2D	0.0020951	1.61835e-15	BMI	TRUE	C2	0.683
rs10083361	G	A	G	A	0.0126772	0.006	0.0086	0.48	T2D	0.00219964	8.24826e-09	BMI	TRUE	C2	0.666
rs10118701	A	G	A	G	-0.0154504	-0.015	0.0088	0.099	T2D	0.00222886	4.15047e-12	BMI	TRUE	C2	0.718
rs10132280	A	C	A	C	-0.0228364	-0.024	0.009	0.0072	T2D	0.00213943	1.3463e-26	BMI	TRUE	C2	0.789
rs10182181	A	G	A	G	-0.0308433	-0.005	0.0084	0.55	T2D	0.00201851	1.03514e-52	BMI	TRUE	C3	0.911
rs10186145	A	G	A	G	-0.0121795	0.0064	0.0084	0.45	T2D	0.00214795	1.42566e-08	BMI	TRUE	C3	0.666
rs10192119	T	G	T	G	-0.0154945	-0.015	0.011	0.17	T2D	0.00254053	1.06785e-09	BMI	TRUE	C2	0.665
rs10269783	A	G	A	G	0.0148125	0.0065	0.0084	0.44	T2D	0.00200435	1.46594e-13	BMI	TRUE	C2	0.688
rs10456700	C	T	C	T	-0.0174582	-0.022	0.0089	0.015	T2D	0.00220367	2.33058e-15	BMI	TRUE	C2	0.63
rs1045861	G	T	G	T	-0.0145707	-0.0088	0.0089	0.32	T2D	0.00237175	8.07562e-10	BMI	TRUE	C2	0.709
rs10460960	G	A	G	A	-0.0195853	-0.027	0.013	0.037	T2D	0.00320475	9.88022e-10	BMI	TRUE	C2	0.59
rs10475800	G	C	G	C	0.0143764	0.017	0.0084	0.049	T2D	0.00216539	3.15394e-11	BMI	FALSE
rs10510554	T	C	T	C	-0.0181312	-0.0073	0.0083	0.38	T2D	0.00200342	1.42797e-19	BMI	TRUE	C2	0.689
rs10514710	G	A	G	A	0.016855	0.025	0.011	0.018	T2D	0.00251986	2.24864e-11	BMI	TRUE	C2	0.556
rs1051730	A	G	A	G	-0.0143973	-0.013	0.0088	0.13	T2D	0.00212659	1.28648e-11	BMI	TRUE	C2	0.709
rs1052177	G	A	G	A	-0.0158489	0.03	0.0093	0.0014	T2D	0.00248662	1.84571e-10	BMI	TRUE	C4	0.903
rs1062633	C	T	C	T	0.0209585	0.021	0.0083	0.0098	T2D	0.00216851	4.24895e-22	BMI	TRUE	C2	0.816
rs10750540	C	G	C	G	0.0136024	0.011	0.0087	0.19	T2D	0.002275	2.24387e-09	BMI	FALSE
rs10772983	T	C	T	C	-0.0108361	-0.018	0.0083	0.027	T2D	0.00197192	3.90316e-08	BMI	TRUE	C2	0.532
rs10779751	A	G	A	G	0.0143132	-0.031	0.0094	0.00089	T2D	0.00225143	2.052e-10	BMI	TRUE	C4	0.948
rs10786019	C	G	C	G	0.0124672	0.0098	0.009	0.28	T2D	0.0022238	2.06736e-08	BMI	FALSE
rs10819656	C	G	C	G	-0.0211164	-0.02	0.011	0.063	T2D	0.00251957	5.24967e-17	BMI	FALSE
rs10883648	A	C	A	C	-0.0127881	-0.0061	0.0084	0.47	T2D	0.0021574	3.07544e-09	BMI	TRUE	C2	0.672
rs10886017	A	C	A	C	0.0162947	0.019	0.0096	0.051	T2D	0.00229447	1.23215e-12	BMI	TRUE	C2	0.66
rs10899469	C	T	C	T	-0.0153823	-0.015	0.011	0.2	T2D	0.00259826	3.21478e-09	BMI	TRUE	C2	0.662
rs10902221	C	T	C	T	0.0130184	0.0076	0.0088	0.39	T2D	0.00225555	7.84589e-09	BMI	TRUE	C2	0.681
rs10903340	T	G	T	G	-0.0117224	-0.029	0.0087	0.00093	T2D	0.00204593	1.00666e-08	BMI	TRUE	C1	0.685
rs10909880	T	C	T	C	-0.0129395	0.0057	0.0085	0.5	T2D	0.00204568	2.52752e-10	BMI	TRUE	C3	0.67
rs10920678	A	G	A	G	0.0138115	0.0091	0.0084	0.28	T2D	0.00200235	5.28764e-12	BMI	TRUE	C2	0.716
rs10923724	C	T	C	T	0.0124676	-0.0017	0.0084	0.84	T2D	0.00208204	2.12206e-09	BMI	TRUE	C3	0.498
rs10929925	C	A	C	A	0.0175115	0.024	0.0083	0.0042	T2D	0.00200174	2.16885e-18	BMI	TRUE	C2	0.555
rs10932071	T	C	T	C	0.031069	0.0087	0.016	0.58	T2D	0.00453193	7.10234e-12	BMI	TRUE	C2	0.607
rs10968576	G	A	G	A	0.0231848	0.047	0.0089	1.1e-07	T2D	0.00209297	1.6133e-28	BMI	TRUE	C1	0.945
rs10984333	T	G	T	G	-0.0146893	-0.016	0.01	0.11	T2D	0.00235154	4.19313e-10	BMI	TRUE	C2	0.656
rs10985963	T	C	T	C	0.0141109	0.015	0.0087	0.093	T2D	0.00223953	2.96031e-10	BMI	TRUE	C2	0.68
rs11029764	C	T	C	T	-0.0304382	-0.0062	0.019	0.75	T2D	0.00495909	8.36487e-10	BMI	TRUE	C2	0.592
rs11038440	C	T	C	T	-0.0143249	-0.017	0.0083	0.039	T2D	0.00200886	9.97261e-13	BMI	TRUE	C2	0.655
rs11052536	C	T	C	T	-0.0187022	-0.047	0.012	0.0001	T2D	0.00292282	1.56726e-10	BMI	TRUE	C1	0.792
rs11065612	G	T	G	T	-0.0128221	-0.0034	0.0099	0.73	T2D	0.00229078	2.17749e-08	BMI	TRUE	C2	0.614
rs1106908	G	A	G	A	0.0174853	0.019	0.0083	0.025	T2D	0.00202472	5.82651e-18	BMI	TRUE	C2	0.726
rs11079691	A	T	A	T	-0.0146974	-0.0007	0.0098	0.94	T2D	0.00266205	3.36944e-08	BMI	FALSE
rs11102112	G	A	G	A	0.0129751	0.0012	0.0088	0.89	T2D	0.00236193	3.94194e-08	BMI	TRUE	C2	0.561
rs11105839	T	A	T	A	0.0133196	-0.0006	0.0086	0.94	T2D	0.00204489	7.33723e-11	BMI	FALSE
rs11115176	T	C	T	C	0.0152091	0.034	0.01	0.00099	T2D	0.00236125	1.18597e-10	BMI	TRUE	C1	0.696
rs11121213	A	C	A	C	-0.016944	-0.017	0.011	0.11	T2D	0.00279823	1.40214e-09	BMI	TRUE	C2	0.68
rs11126666	G	A	G	A	-0.0161249	0.0088	0.0093	0.34	T2D	0.00213348	4.09299e-14	BMI	TRUE	C3	0.825
rs11131585	T	C	T	C	0.0141017	0.0002	0.0094	0.98	T2D	0.00240259	4.37468e-09	BMI	TRUE	C2	0.526
rs11134425	A	G	A	G	-0.0117461	-0.015	0.0084	0.066	T2D	0.00201924	5.98799e-09	BMI	TRUE	C2	0.614
rs11155262	G	T	G	T	-0.0146863	0.019	0.0095	0.051	T2D	0.00249418	3.90323e-09	BMI	TRUE	C3	0.822
rs11170468	C	A	C	A	-0.0179968	-0.016	0.0098	0.097	T2D	0.00245668	2.37765e-13	BMI	TRUE	C2	0.747
rs11172496	G	T	G	T	0.0408245	0.025	0.021	0.23	T2D	0.00634887	1.27437e-10	BMI	TRUE	C2	0.763
rs11229439	G	A	G	A	0.0152751	0.0065	0.011	0.56	T2D	0.00278547	4.16182e-08	BMI	TRUE	C2	0.648
rs11577179	A	G	A	G	-0.0190303	0.0027	0.0086	0.75	T2D	0.00206447	3.02656e-20	BMI	TRUE	C3	0.814
rs11583200	C	T	C	T	0.0150725	-0.0002	0.0085	0.98	T2D	0.00200532	5.63647e-14	BMI	TRUE	C3	0.542
rs1159974	C	T	C	T	0.0121324	0.036	0.0083	1e-05	T2D	0.00213963	1.42512e-08	BMI	TRUE	C1	0.842
rs11611246	T	G	T	G	0.0230763	0.0076	0.01	0.45	T2D	0.00249337	2.14174e-20	BMI	TRUE	C2	0.618
rs11632852	T	C	T	C	-0.0134641	-0.017	0.0083	0.039	T2D	0.00213608	2.9162e-10	BMI	TRUE	C2	0.625
rs11637749	A	C	A	C	-0.0117701	-0.015	0.0083	0.072	T2D	0.0021553	4.73429e-08	BMI	TRUE	C2	0.616
rs11642740	A	G	A	G	-0.0201835	-0.041	0.0085	1.4e-06	T2D	0.00221359	7.65273e-20	BMI	TRUE	C1	0.907
rs11664	A	G	A	G	-0.0220321	-0.013	0.01	0.21	T2D	0.00260255	2.54855e-17	BMI	TRUE	C2	0.797
rs11672660	C	T	C	T	0.0247982	-0.019	0.01	0.062	T2D	0.00239635	4.25897e-25	BMI	TRUE	C3	0.99
rs1167309	C	T	C	T	0.0165205	-0.0004	0.0089	0.96	T2D	0.00224298	1.76601e-13	BMI	TRUE	C3	0.583
rs1167800	G	A	G	A	-0.0173098	-0.0058	0.0086	0.5	T2D	0.0020496	3.02823e-17	BMI	TRUE	C2	0.641
rs11679265	A	G	A	G	-0.0362516	-0.0006	0.026	0.98	T2D	0.00622771	5.84896e-09	BMI	TRUE	C2	0.546
rs11692071	T	G	T	G	0.0148376	0.031	0.0086	0.00032	T2D	0.00225518	4.72547e-11	BMI	TRUE	C1	0.729
rs11692326	T	C	T	C	0.0176795	0.03	0.0098	0.0024	T2D	0.00238531	1.24571e-13	BMI	TRUE	C1	0.579
rs11707605	T	C	T	C	-0.0162881	-0.0015	0.0094	0.87	T2D	0.00265428	8.43394e-10	BMI	TRUE	C2	0.516
rs11716220	T	C	T	C	0.0143043	0.0013	0.01	0.9	T2D	0.0026142	4.45596e-08	BMI	TRUE	C2	0.566
rs11727676	C	T	C	T	-0.0265454	0.06	0.014	3.4e-05	T2D	0.00377896	2.14784e-12	BMI	TRUE	C4	0.987
rs11738695	C	A	C	A	-0.0140979	-0.0054	0.0084	0.52	T2D	0.00217531	9.11804e-11	BMI	TRUE	C2	0.662
rs11750790	A	G	A	G	0.0150738	0.0022	0.01	0.83	T2D	0.00271493	2.8215e-08	BMI	TRUE	C2	0.577
rs11754747	C	T	C	T	-0.0167637	0.0049	0.0097	0.61	T2D	0.00243143	5.40279e-12	BMI	TRUE	C3	0.702
rs11755266	C	T	C	T	-0.0185567	0.02	0.014	0.15	T2D	0.00311523	2.57284e-09	BMI	TRUE	C3	0.749
rs11781699	T	C	T	C	-0.0156991	-0.011	0.011	0.28	T2D	0.00233171	1.66316e-11	BMI	TRUE	C2	0.679
rs11823283	A	G	A	G	0.0187903	0.011	0.011	0.33	T2D	0.00278276	1.45431e-11	BMI	TRUE	C2	0.718
rs1184523	T	G	T	G	0.0146256	0.022	0.0089	0.015	T2D	0.00224836	7.77039e-11	BMI	TRUE	C2	0.536
rs11847697	T	C	T	C	0.0506476	0.033	0.021	0.12	T2D	0.00659106	1.53849e-14	BMI	TRUE	C2	0.848
rs11880870	G	A	G	A	-0.0170859	-0.017	0.0087	0.047	T2D	0.00209617	3.60861e-16	BMI	TRUE	C2	0.744
rs11919195	A	G	A	G	-0.0169932	0.026	0.013	0.041	T2D	0.00304487	2.39244e-08	BMI	TRUE	C3	0.647
rs11978101	A	G	A	G	-0.0142515	-0.02	0.0092	0.028	T2D	0.00252326	1.62252e-08	BMI	TRUE	C2	0.581
rs1199334	G	A	G	A	-0.0154558	-0.015	0.01	0.13	T2D	0.00244364	2.53352e-10	BMI	TRUE	C2	0.685
rs11997175	T	C	T	C	-0.0133112	-0.0076	0.0084	0.36	T2D	0.00200364	3.06307e-11	BMI	TRUE	C2	0.696
rs12122071	A	G	A	G	0.0138163	-0.0013	0.0091	0.89	T2D	0.0021967	3.18311e-10	BMI	TRUE	C3	0.49
rs12150261	T	G	T	G	-0.0118104	-0.013	0.0083	0.12	T2D	0.00200452	3.81843e-09	BMI	TRUE	C2	0.649
rs12269541	C	A	C	A	0.0159015	-0.0009	0.011	0.93	T2D	0.00269077	3.42827e-09	BMI	TRUE	C2	0.51
rs12286929	G	A	G	A	0.0188714	0.017	0.0083	0.042	T2D	0.00200579	5.03358e-21	BMI	TRUE	C2	0.82
rs12379623	A	G	A	G	-0.0120312	-0.0011	0.0085	0.9	T2D	0.00217066	2.9794e-08	BMI	TRUE	C2	0.568
rs12429002	G	A	G	A	0.0164086	0.012	0.009	0.19	T2D	0.00244462	1.91772e-11	BMI	TRUE	C2	0.754
rs12429545	G	A	G	A	-0.0308812	-0.047	0.014	0.00055	T2D	0.00294655	1.06236e-25	BMI	TRUE	C1	0.569
rs12431280	A	G	A	G	-0.0216528	-0.012	0.011	0.27	T2D	0.00282399	1.75461e-14	BMI	TRUE	C2	0.751
rs12446632	A	G	A	G	-0.0389164	-0.052	0.012	2.5e-05	T2D	0.00300363	2.16039e-38	BMI	TRUE	C1	0.535
rs12454712	T	C	T	C	-0.0133556	0.05	0.009	2.3e-08	T2D	0.00218062	9.08571e-10	BMI	TRUE	C4	0.95
rs12471691	A	G	A	G	0.0207424	0.035	0.017	0.042	T2D	0.00354772	5.01456e-09	BMI	TRUE	C2	0.537
rs12486280	G	T	G	T	0.0171687	-0.0012	0.011	0.92	T2D	0.00275692	4.73957e-10	BMI	TRUE	C3	0.494
rs12502727	G	A	G	A	0.0187002	0.017	0.013	0.21	T2D	0.00340273	3.8933e-08	BMI	TRUE	C2	0.675
rs12513212	C	A	C	A	0.013141	0.015	0.0084	0.066	T2D	0.00219222	2.04267e-09	BMI	TRUE	C2	0.655
rs12519315	T	A	T	A	0.0136987	0.025	0.0089	0.0042	T2D	0.00226559	1.48107e-09	BMI	FALSE
rs12566985	G	A	G	A	0.020627	-0.0032	0.0083	0.7	T2D	0.00200318	7.26016e-25	BMI	TRUE	C3	0.902
rs12593036	A	G	A	G	0.0132596	0.022	0.0097	0.021	T2D	0.0023754	2.37729e-08	BMI	TRUE	C2	0.523
rs12596638	G	A	G	A	0.0147467	0.023	0.011	0.037	T2D	0.00240901	9.27153e-10	BMI	TRUE	C2	0.552
rs12622013	A	G	A	G	-0.0169392	-0.028	0.013	0.035	T2D	0.00307875	3.75584e-08	BMI	TRUE	C2	0.534
rs12626122	G	A	G	A	0.0170195	0.018	0.0086	0.031	T2D	0.00228778	1.01222e-13	BMI	TRUE	C2	0.724
rs12651574	T	A	T	A	-0.0153129	-0.0057	0.01	0.58	T2D	0.00267815	1.07969e-08	BMI	FALSE
rs12701887	T	G	T	G	0.0139785	0.014	0.0086	0.11	T2D	0.00229991	1.21787e-09	BMI	TRUE	C2	0.693
rs12831874	G	T	G	T	0.018232	0.018	0.013	0.15	T2D	0.00312973	5.69732e-09	BMI	TRUE	C2	0.662
rs12885454	C	A	C	A	0.0225558	0.018	0.0087	0.033	T2D	0.00210443	8.35561e-27	BMI	TRUE	C2	0.889
rs12899850	C	T	C	T	0.0152316	0.0057	0.011	0.59	T2D	0.002553	2.4291e-09	BMI	TRUE	C2	0.639
rs12912988	T	G	T	G	0.0132516	0.01	0.0083	0.22	T2D	0.0021694	1.00625e-09	BMI	TRUE	C2	0.711
rs12940622	A	G	A	G	-0.0170267	-0.018	0.0084	0.031	T2D	0.00205021	9.99496e-17	BMI	TRUE	C2	0.73
rs12961741	G	A	G	A	0.0117156	-0.0078	0.0084	0.35	T2D	0.00214352	4.61367e-08	BMI	TRUE	C3	0.687
rs1296328	C	A	C	A	-0.0131671	-0.025	0.0084	0.0033	T2D	0.0021954	2.00308e-09	BMI	TRUE	C1	0.596
rs13011472	G	C	G	C	-0.01517	0.0018	0.0083	0.83	T2D	0.00214725	1.60765e-12	BMI	FALSE
rs13021737	A	G	A	G	-0.0638065	-0.047	0.011	2.5e-05	T2D	0.00265246	7.29181e-128	BMI	TRUE	C2	1
rs13037435	A	G	A	G	0.0180026	-0.017	0.013	0.19	T2D	0.00289739	5.18603e-10	BMI	TRUE	C3	0.764
rs13069244	G	A	G	A	-0.0247057	-0.036	0.016	0.022	T2D	0.00434934	1.34439e-08	BMI	TRUE	C2	0.563
rs13078960	T	G	T	G	-0.0271345	-0.0024	0.011	0.82	T2D	0.00258557	9.14966e-26	BMI	TRUE	C3	0.702
rs13099106	A	G	A	G	-0.0132358	-0.0013	0.0085	0.88	T2D	0.00217786	1.22117e-09	BMI	TRUE	C2	0.552
rs13099482	A	T	A	T	-0.0117527	-0.017	0.0086	0.051	T2D	0.0020251	6.49442e-09	BMI	FALSE
rs13107325	C	T	C	T	-0.0508964	-0.028	0.018	0.13	T2D	0.0057893	1.47624e-18	BMI	TRUE	C2	0.848
rs13107802	G	A	G	A	0.0231952	0.03	0.013	0.024	T2D	0.00321087	5.04943e-13	BMI	TRUE	C2	0.615
rs13114338	A	G	A	G	-0.0136579	-0.0009	0.0088	0.92	T2D	0.00227055	1.79638e-09	BMI	TRUE	C2	0.539
rs13130484	C	T	C	T	-0.0394425	-0.046	0.0084	2.9e-08	T2D	0.00200418	3.19171e-86	BMI	TRUE	C2	0.798
rs13155482	T	C	T	C	0.018304	0.025	0.01	0.014	T2D	0.00282558	9.29572e-11	BMI	TRUE	C2	0.58
rs13188558	A	G	A	G	0.0121377	0.006	0.0086	0.48	T2D	0.0022073	3.82183e-08	BMI	TRUE	C2	0.661
rs13191362	A	G	A	G	0.0272729	0.023	0.013	0.072	T2D	0.00360926	4.14487e-14	BMI	TRUE	C2	0.801
rs13228034	C	T	C	T	-0.0135203	-0.016	0.0084	0.055	T2D	0.00216251	4.04928e-10	BMI	TRUE	C2	0.648
rs1333010	G	A	G	A	0.0212625	0.032	0.0085	0.00019	T2D	0.00221213	7.13192e-22	BMI	TRUE	C1	0.619
rs1333702	C	G	C	G	0.0148525	0.026	0.01	0.009	T2D	0.00270635	4.06428e-08	BMI	FALSE
rs13392503	G	T	G	T	0.0158895	0.016	0.0094	0.093	T2D	0.00216959	2.41126e-13	BMI	TRUE	C2	0.701
rs13407070	G	A	G	A	0.0150587	0.021	0.01	0.036	T2D	0.00269455	2.2893e-08	BMI	TRUE	C2	0.585
rs13417156	T	C	T	C	-0.0168022	-0.021	0.0085	0.012	T2D	0.00211239	1.80409e-15	BMI	TRUE	C2	0.636
rs13419388	C	T	C	T	-0.0146945	-0.0021	0.011	0.85	T2D	0.00261015	1.80458e-08	BMI	TRUE	C2	0.588
rs13432797	G	C	G	C	-0.0133185	0.046	0.0087	9.5e-08	T2D	0.00207369	1.33954e-10	BMI	FALSE
rs1349351	A	G	A	G	-0.0125885	-0.0054	0.0088	0.54	T2D	0.0020165	4.30012e-10	BMI	TRUE	C2	0.653
rs1362910	A	G	A	G	0.0144294	0.03	0.0084	0.00033	T2D	0.00212335	1.07901e-11	BMI	TRUE	C1	0.722
rs1403533	T	C	T	C	0.0162313	0.03	0.01	0.0039	T2D	0.00260837	4.8847e-10	BMI	TRUE	C1	0.594
rs1436351	G	T	G	T	-0.0179565	-0.01	0.0098	0.29	T2D	0.00239551	6.58417e-14	BMI	TRUE	C2	0.732
rs1439620	G	A	G	A	-0.014514	0.0088	0.0088	0.32	T2D	0.00210147	4.9649e-12	BMI	TRUE	C3	0.808
rs1441264	A	G	A	G	0.0153734	0.024	0.0086	0.0062	T2D	0.00210236	2.62244e-13	BMI	TRUE	C1	0.504
rs1445796	G	A	G	A	-0.0154104	-0.02	0.0091	0.03	T2D	0.00235735	6.2686e-11	BMI	TRUE	C2	0.614
rs1452075	C	T	C	T	-0.0169156	-0.018	0.0093	0.055	T2D	0.00223256	3.54342e-14	BMI	TRUE	C2	0.703
rs1466783	G	C	G	C	-0.0117386	-0.0036	0.0084	0.67	T2D	0.00213911	4.07482e-08	BMI	FALSE
rs1469928	G	A	G	A	0.0161137	0.02	0.009	0.03	T2D	0.00239348	1.66981e-11	BMI	TRUE	C2	0.637
rs1472169	T	C	T	C	-0.0136661	-0.0037	0.0086	0.67	T2D	0.00227639	1.93224e-09	BMI	TRUE	C2	0.619
rs1488830	T	C	T	C	0.0408901	0.02	0.011	0.061	T2D	0.0025848	2.28467e-56	BMI	TRUE	C2	0.832
rs1493354	G	A	G	A	-0.0118826	0.0065	0.0084	0.44	T2D	0.00214664	3.10447e-08	BMI	TRUE	C3	0.654
rs1520048	A	G	A	G	0.0118797	0.026	0.0085	0.0019	T2D	0.00216283	3.95922e-08	BMI	TRUE	C1	0.629
rs1528435	T	C	T	C	0.0185909	0.024	0.0085	0.0045	T2D	0.00204895	1.15378e-19	BMI	TRUE	C2	0.606
rs1532331	T	G	T	G	0.015375	0.026	0.009	0.0036	T2D	0.00222584	4.93365e-12	BMI	TRUE	C1	0.55
rs1546924	C	T	C	T	-0.0154309	-0.023	0.0084	0.0065	T2D	0.0020338	3.26812e-14	BMI	TRUE	C2	0.516
rs1560653	C	T	C	T	-0.0247225	-0.02	0.014	0.15	T2D	0.00403056	8.58269e-10	BMI	TRUE	C2	0.742
rs1561589	G	A	G	A	-0.0123127	-0.0001	0.0088	0.99	T2D	0.00223516	3.61586e-08	BMI	TRUE	C2	0.543
rs1568986	T	C	T	C	-0.0157868	-0.001	0.0093	0.91	T2D	0.00247525	1.79588e-10	BMI	TRUE	C2	0.507
rs1580099	C	A	C	A	0.0156297	0.034	0.0084	5.3e-05	T2D	0.00209931	9.68323e-14	BMI	TRUE	C1	0.811
rs1582931	G	A	G	A	0.0183831	0.011	0.0084	0.19	T2D	0.00215836	1.63488e-17	BMI	TRUE	C2	0.798
rs1593312	T	G	T	G	0.0146267	0.026	0.0097	0.0073	T2D	0.00231914	2.84557e-10	BMI	TRUE	C1	0.53
rs1624064	C	T	C	T	-0.0149374	-0.0073	0.0085	0.39	T2D	0.00217104	5.97366e-12	BMI	TRUE	C2	0.703
rs166297	A	G	A	G	-0.0181271	-0.023	0.015	0.14	T2D	0.00308791	4.34891e-09	BMI	TRUE	C2	0.606
rs16851483	G	T	G	T	-0.0377179	-0.019	0.017	0.27	T2D	0.00477756	2.90763e-15	BMI	TRUE	C2	0.759
rs16868846	C	G	C	G	-0.0254851	0.052	0.018	0.0038	T2D	0.00452314	1.75689e-08	BMI	FALSE
rs16896181	A	G	A	G	-0.0726672	-0.056	0.047	0.23	T2D	0.0103124	1.83327e-12	BMI	TRUE	C2	0.701
rs16902795	G	C	G	C	-0.0306428	-0.045	0.024	0.058	T2D	0.00500614	9.29617e-10	BMI	FALSE
rs16907751	C	T	C	T	0.0288877	0.034	0.014	0.015	T2D	0.00346467	7.56825e-17	BMI	TRUE	C2	0.677
rs16912217	C	T	C	T	-0.0196933	-0.02	0.013	0.12	T2D	0.00356314	3.25845e-08	BMI	TRUE	C2	0.674
rs16996700	T	C	T	C	0.0213695	0.043	0.0093	3.5e-06	T2D	0.002295	1.26251e-20	BMI	TRUE	C1	0.883
rs17024393	C	T	C	T	0.0711528	0.056	0.023	0.015	T2D	0.0047929	7.44199e-50	BMI	TRUE	C2	0.948
rs17094222	C	T	C	T	0.0261007	0.031	0.01	0.0027	T2D	0.00239001	9.17372e-28	BMI	TRUE	C2	0.688
rs17122581	T	C	T	C	-0.0161731	-0.0054	0.01	0.6	T2D	0.00257158	3.19215e-10	BMI	TRUE	C2	0.642
rs17234250	A	C	A	C	-0.0279963	-0.015	0.015	0.32	T2D	0.00443746	2.80721e-10	BMI	TRUE	C2	0.731
rs17279030	A	C	A	C	0.0338993	0.039	0.02	0.051	T2D	0.00540075	3.45675e-10	BMI	TRUE	C2	0.664
rs17381664	C	T	C	T	0.0172068	-0.0049	0.0085	0.56	T2D	0.00206562	8.07959e-17	BMI	TRUE	C3	0.829
rs17391694	T	C	T	C	0.0288025	-0.017	0.013	0.19	T2D	0.00309905	1.48637e-20	BMI	TRUE	C3	0.967
rs17414107	C	T	C	T	0.0198276	0.027	0.012	0.025	T2D	0.00350969	1.61031e-08	BMI	TRUE	C2	0.591
rs17464848	G	A	G	A	-0.014966	-0.0046	0.011	0.69	T2D	0.00266466	1.94895e-08	BMI	TRUE	C2	0.625
rs17484848	C	T	C	T	0.020447	-0.044	0.014	0.0013	T2D	0.00353217	7.08903e-09	BMI	TRUE	C4	0.925
rs17513613	C	T	C	T	0.011613	0.015	0.0094	0.1	T2D	0.00210795	3.60574e-08	BMI	TRUE	C2	0.605
rs1752156	C	T	C	T	0.0180697	0.037	0.011	0.00052	T2D	0.0024752	2.87179e-13	BMI	TRUE	C1	0.681
rs17522122	G	T	G	T	-0.0217367	-0.039	0.0084	3.9e-06	T2D	0.00206558	6.74716e-26	BMI	TRUE	C1	0.86
rs17537498	C	T	C	T	-0.0168277	-0.0075	0.013	0.56	T2D	0.00295987	1.30599e-08	BMI	TRUE	C2	0.64
rs17573940	G	A	G	A	0.0180586	0.031	0.0093	0.00098	T2D	0.00231342	5.90259e-15	BMI	TRUE	C1	0.63
rs17616836	A	G	A	G	-0.0142198	-0.0075	0.0093	0.42	T2D	0.00238462	2.47419e-09	BMI	TRUE	C2	0.682
rs1765131	G	C	G	C	0.0146736	0.02	0.0097	0.036	T2D	0.00234879	4.17519e-10	BMI	FALSE
rs17724992	A	G	A	G	0.0168432	0.0067	0.0099	0.5	T2D	0.00233477	5.42925e-13	BMI	TRUE	C2	0.668
rs17759796	A	C	A	C	0.0198492	0.0098	0.012	0.41	T2D	0.0030808	1.17245e-10	BMI	TRUE	C2	0.692
rs17787739	G	A	G	A	-0.0324021	-0.026	0.024	0.27	T2D	0.00489263	3.52865e-11	BMI	TRUE	C2	0.666
rs17826675	T	G	T	G	-0.0125828	-0.014	0.0092	0.12	T2D	0.00224013	1.94307e-08	BMI	TRUE	C2	0.641
rs1814170	A	T	A	T	0.0180961	-0.032	0.014	0.021	T2D	0.00301652	1.98552e-09	BMI	FALSE
rs1837269	T	C	T	C	-0.0204966	-0.015	0.0085	0.081	T2D	0.00214579	1.27204e-21	BMI	TRUE	C2	0.862
rs1839115	C	T	C	T	0.0145157	0.019	0.01	0.062	T2D	0.0024999	6.37834e-09	BMI	TRUE	C2	0.609
rs1860576	G	A	G	A	0.0150212	0.0087	0.01	0.39	T2D	0.00235466	1.7787e-10	BMI	TRUE	C2	0.684
rs1861410	C	T	C	T	0.0231436	0.034	0.0083	3.8e-05	T2D	0.00216976	1.46115e-26	BMI	TRUE	C1	0.644
rs1876334	G	A	G	A	0.0152723	0.015	0.011	0.16	T2D	0.00266237	9.67309e-09	BMI	TRUE	C2	0.66
rs1896767	A	G	A	G	-0.0120076	-0.021	0.0084	0.013	T2D	0.00213869	1.97151e-08	BMI	TRUE	C1	0.498
rs1924923	A	G	A	G	-0.0129642	-0.011	0.0086	0.2	T2D	0.00219283	3.37791e-09	BMI	TRUE	C2	0.691
rs1927790	T	C	T	C	-0.0148395	-0.014	0.0084	0.1	T2D	0.00200193	1.23851e-13	BMI	TRUE	C2	0.725
rs1928295	C	T	C	T	-0.0165468	-0.0094	0.0083	0.26	T2D	0.00200133	1.36352e-16	BMI	TRUE	C2	0.759
rs1935353	C	T	C	T	0.0153114	0.012	0.0083	0.14	T2D	0.00213655	7.70024e-13	BMI	TRUE	C2	0.758
rs1937450	G	T	G	T	0.01205	0.0081	0.0089	0.36	T2D	0.00217311	2.93879e-08	BMI	TRUE	C2	0.666
rs1941213	A	C	A	C	0.016794	-0.01	0.0093	0.28	T2D	0.00242217	4.10698e-12	BMI	TRUE	C3	0.872
rs1943477	T	C	T	C	-0.0249031	-0.0052	0.018	0.77	T2D	0.00407107	9.52993e-10	BMI	TRUE	C2	0.603
rs1966265	A	G	A	G	-0.0176395	-0.011	0.01	0.26	T2D	0.0027643	1.75757e-10	BMI	TRUE	C2	0.734
rs1972812	G	A	G	A	0.0117181	0.0002	0.0082	0.98	T2D	0.00213919	4.30598e-08	BMI	TRUE	C2	0.541
rs197870	G	A	G	A	0.0280107	-0.012	0.021	0.56	T2D	0.00505569	3.0171e-08	BMI	TRUE	C3	0.557
rs1978864	T	C	T	C	0.0160624	0.0042	0.0093	0.65	T2D	0.002329	5.32336e-12	BMI	TRUE	C2	0.611
rs1979755	G	C	G	C	-0.0145731	-0.012	0.0084	0.16	T2D	0.00219364	3.06641e-11	BMI	FALSE
rs1982441	G	T	G	T	-0.0206702	-0.016	0.012	0.18	T2D	0.0028572	4.6747e-13	BMI	TRUE	C2	0.735
rs1996401	G	T	G	T	-0.0142126	-0.0087	0.0083	0.29	T2D	0.00218879	8.39543e-11	BMI	TRUE	C2	0.723
rs2010281	G	A	G	A	0.0145343	0.031	0.0088	0.00044	T2D	0.00209868	4.34599e-12	BMI	TRUE	C1	0.716
rs2015729	G	A	G	A	-0.0158382	0.0054	0.0086	0.53	T2D	0.00223128	1.26341e-12	BMI	TRUE	C3	0.783
rs2029566	T	G	T	G	0.0213408	0.013	0.013	0.33	T2D	0.00366616	5.84865e-09	BMI	TRUE	C2	0.711
rs2039334	T	A	T	A	-0.0139905	-0.01	0.01	0.32	T2D	0.0024251	7.97281e-09	BMI	FALSE
rs2075650	A	G	A	G	0.0253635	0.076	0.012	2.2e-10	T2D	0.00274644	2.58136e-20	BMI	TRUE	C1	0.9
rs208015	T	C	T	C	0.0302072	-0.0035	0.016	0.83	T2D	0.00366335	1.64099e-16	BMI	TRUE	C3	0.664
rs2107118	G	A	G	A	-0.0139283	-0.015	0.0085	0.075	T2D	0.00230327	1.47384e-09	BMI	TRUE	C2	0.678
rs2112347	G	T	G	T	-0.0241888	-0.051	0.0087	4.8e-09	T2D	0.0020201	4.8597e-33	BMI	TRUE	C1	0.975
rs2113426	G	A	G	A	-0.0133802	-0.0071	0.0089	0.43	T2D	0.00231823	7.84617e-09	BMI	TRUE	C2	0.678
rs2114824	G	A	G	A	0.0154012	0.035	0.0083	2.6e-05	T2D	0.00214389	6.78247e-13	BMI	TRUE	C1	0.839
rs2124499	G	C	G	C	0.0113949	-0.029	0.0089	0.0011	T2D	0.00207936	4.25366e-08	BMI	FALSE
rs2143624	G	A	G	A	-0.0116059	-0.0044	0.0086	0.61	T2D	0.00204568	1.40031e-08	BMI	TRUE	C2	0.637
rs2145270	C	T	C	T	-0.0135323	-0.003	0.0086	0.73	T2D	0.00214656	2.89709e-10	BMI	TRUE	C2	0.601
rs2155645	T	C	T	C	-0.0138765	-0.032	0.0095	0.00087	T2D	0.00221243	3.56263e-10	BMI	TRUE	C1	0.691
rs2207139	G	A	G	A	0.0430984	0.042	0.011	0.0001	T2D	0.00252508	2.56257e-65	BMI	TRUE	C2	0.955
rs2226636	T	A	T	A	-0.0126361	-0.023	0.0085	0.0078	T2D	0.00225179	2.00486e-08	BMI	FALSE
rs2228213	G	A	G	A	0.0150664	0.0086	0.0092	0.35	T2D	0.0021132	1.00614e-12	BMI	TRUE	C2	0.705
rs2228273	A	G	A	G	0.0255314	0.0013	0.016	0.93	T2D	0.00445847	1.02528e-08	BMI	TRUE	C2	0.523
rs2229992	T	C	T	C	0.0131937	0.014	0.0085	0.09	T2D	0.00216501	1.10101e-09	BMI	TRUE	C2	0.671
rs2241423	A	G	A	G	-0.0298298	-0.042	0.01	3.4e-05	T2D	0.00256325	2.6572e-31	BMI	TRUE	C1	0.605
rs2245368	T	C	T	C	-0.0361278	-0.036	0.011	0.001	T2D	0.00279888	4.0601e-38	BMI	TRUE	C2	0.899
rs2246012	T	C	T	C	-0.0164742	-0.026	0.011	0.017	T2D	0.00247546	2.83278e-11	BMI	TRUE	C2	0.528
rs2256783	C	T	C	T	-0.0110765	-0.015	0.0084	0.065	T2D	0.00201923	4.12323e-08	BMI	TRUE	C2	0.597
rs2267958	A	G	A	G	-0.0163763	-0.016	0.0087	0.071	T2D	0.00226708	5.06532e-13	BMI	TRUE	C2	0.737
rs2272163	C	A	C	A	0.0137912	0.037	0.0086	1.3e-05	T2D	0.00228662	1.62673e-09	BMI	TRUE	C1	0.848
rs2275003	G	A	G	A	-0.0134902	-0.036	0.0083	1.6e-05	T2D	0.00200063	1.55166e-11	BMI	TRUE	C1	0.853
rs2275426	A	G	A	G	0.0130586	0.025	0.0084	0.0031	T2D	0.00204526	1.71619e-10	BMI	TRUE	C1	0.597
rs2299383	C	T	C	T	-0.0131434	-0.026	0.0083	0.0015	T2D	0.00200452	5.49432e-11	BMI	TRUE	C1	0.632
rs2302737	C	T	C	T	-0.0129264	-0.01	0.0085	0.22	T2D	0.0022365	7.48173e-09	BMI	TRUE	C2	0.697
rs2304130	G	A	G	A	-0.0255102	0.067	0.015	1.4e-05	T2D	0.00402177	2.25271e-10	BMI	TRUE	C4	0.988
rs2309817	A	T	A	T	-0.0159683	-0.025	0.0086	0.0035	T2D	0.0023228	6.21662e-12	BMI	FALSE
rs2316813	C	A	C	A	0.0126089	0.02	0.0088	0.023	T2D	0.00207314	1.1868e-09	BMI	TRUE	C2	0.535
rs2322622	T	C	T	C	-0.012102	-0.0067	0.0086	0.44	T2D	0.00200899	1.7021e-09	BMI	TRUE	C2	0.667
rs2344185	C	T	C	T	-0.0126493	-0.013	0.0084	0.11	T2D	0.00218257	6.80717e-09	BMI	TRUE	C2	0.671
rs2359133	C	G	C	G	0.0141249	0.006	0.0088	0.5	T2D	0.00226883	4.79709e-10	BMI	FALSE
rs2391518	C	T	C	T	-0.0171779	-0.011	0.0088	0.2	T2D	0.00219745	5.40048e-15	BMI	TRUE	C2	0.77
rs2414638	T	C	T	C	-0.0126596	-0.015	0.0086	0.089	T2D	0.00220399	9.2486e-09	BMI	TRUE	C2	0.638
rs2436728	A	G	A	G	0.0216108	0.019	0.0084	0.025	T2D	0.00216603	1.91895e-23	BMI	TRUE	C2	0.872
rs2465043	G	A	G	A	0.0150538	0.023	0.0086	0.0085	T2D	0.0022406	1.83393e-11	BMI	TRUE	C2	0.511
rs2481665	C	T	C	T	-0.015232	-0.015	0.0084	0.074	T2D	0.00204523	9.50493e-14	BMI	TRUE	C2	0.724
rs2512885	C	T	C	T	0.0113287	-0.0013	0.0084	0.88	T2D	0.00200486	1.59854e-08	BMI	TRUE	C2	0.512
rs2528531	A	C	A	C	-0.0171093	0.0005	0.008	0.95	T2D	0.00238024	6.57179e-13	BMI	TRUE	C3	0.7
rs2550739	T	C	T	C	0.0196503	0.036	0.017	0.029	T2D	0.00333636	3.86817e-09	BMI	TRUE	C2	0.519
rs2567302	G	A	G	A	0.0153857	0.0008	0.0095	0.93	T2D	0.002426	2.26803e-10	BMI	TRUE	C2	0.519
rs2579998	T	C	T	C	0.0302028	0.038	0.013	0.0045	T2D	0.0033852	4.57816e-19	BMI	TRUE	C2	0.627
rs2588785	A	G	A	G	-0.0202288	-0.017	0.0093	0.066	T2D	0.00223253	1.29326e-19	BMI	TRUE	C2	0.816
rs25996	C	G	C	G	-0.0128368	-0.0037	0.0084	0.66	T2D	0.00215882	2.74459e-09	BMI	FALSE
rs2605603	A	G	A	G	-0.0113973	-0.028	0.0083	0.00069	T2D	0.00200028	1.21325e-08	BMI	TRUE	C1	0.692
rs2637629	G	A	G	A	0.0139253	0.023	0.009	0.012	T2D	0.00222933	4.19951e-10	BMI	TRUE	C2	0.495
rs2689765	C	T	C	T	0.0133731	0.018	0.011	0.092	T2D	0.00244177	4.33038e-08	BMI	TRUE	C2	0.596
rs2693528	C	G	C	G	-0.0136661	-0.0074	0.0084	0.38	T2D	0.00220801	6.04108e-10	BMI	FALSE
rs2710323	T	C	T	C	-0.0129836	0.0061	0.0085	0.47	T2D	0.00200295	9.0361e-11	BMI	TRUE	C3	0.686
rs2718786	G	A	G	A	-0.0132821	-0.027	0.0086	0.0016	T2D	0.0022478	3.44319e-09	BMI	TRUE	C1	0.637
rs2726040	C	G	C	G	0.0198816	0.016	0.0088	0.066	T2D	0.00213701	1.35974e-20	BMI	FALSE
rs2734838	A	G	A	G	0.0131816	0.041	0.0085	1.5e-06	T2D	0.0020048	4.86582e-11	BMI	TRUE	C1	0.887
rs273512	T	C	T	C	0.0123537	-0.0029	0.0085	0.73	T2D	0.0022039	2.07824e-08	BMI	TRUE	C3	0.534
rs273628	A	G	A	G	0.013008	0.015	0.0084	0.066	T2D	0.00219334	3.01705e-09	BMI	TRUE	C2	0.651
rs2744974	C	T	C	T	-0.0168313	0.017	0.0089	0.059	T2D	0.0021567	5.98955e-15	BMI	TRUE	C3	0.956
rs2820315	T	C	T	C	0.0207475	0.031	0.009	0.00063	T2D	0.00217607	1.50751e-21	BMI	TRUE	C1	0.568
rs2835712	A	C	A	C	-0.0126627	0.0008	0.0083	0.92	T2D	0.00213711	3.12035e-09	BMI	TRUE	C2	0.486
rs2836768	T	G	T	G	-0.0169192	0.0078	0.0084	0.35	T2D	0.00215731	4.40837e-15	BMI	TRUE	C3	0.899
rs284227	C	T	C	T	0.0120842	0.03	0.0095	0.0016	T2D	0.00217786	2.87866e-08	BMI	TRUE	C1	0.65
rs285575	A	G	A	G	0.0128442	0.022	0.0083	0.0085	T2D	0.00200511	1.49634e-10	BMI	TRUE	C1	0.516
rs2881654	A	G	A	G	0.0226198	-0.1	0.013	8.8e-16	T2D	0.00277847	3.91753e-16	BMI	TRUE	Junk	0.607
rs288232	C	T	C	T	0.0176655	0.012	0.011	0.29	T2D	0.0026931	5.39752e-11	BMI	TRUE	C2	0.711
rs2944840	A	T	A	T	-0.0125949	-0.019	0.0084	0.023	T2D	0.00224139	1.91817e-08	BMI	FALSE
rs2959592	T	C	T	C	0.0160317	-0.0085	0.011	0.42	T2D	0.00244282	5.28106e-11	BMI	TRUE	C3	0.672
rs2968487	T	C	T	C	0.0195386	0.021	0.0091	0.02	T2D	0.00234432	7.78648e-17	BMI	TRUE	C2	0.736
rs2972147	C	T	C	T	-0.0137223	0.099	0.0086	7.7e-31	T2D	0.00204815	2.08657e-11	BMI	TRUE	Junk	1
rs2984618	T	G	T	G	0.0128462	0.017	0.0085	0.049	T2D	0.00204477	3.33182e-10	BMI	TRUE	C2	0.606
rs29941	A	G	A	G	-0.0177429	-0.021	0.0089	0.021	T2D	0.00208278	1.61149e-17	BMI	TRUE	C2	0.67
rs3007105	T	C	T	C	0.0112739	0.014	0.0085	0.11	T2D	0.00205495	4.10626e-08	BMI	TRUE	C2	0.617
rs3095670	A	G	A	G	-0.0176553	-0.0091	0.0081	0.26	T2D	0.00217149	4.27442e-16	BMI	TRUE	C2	0.761
rs3101336	T	C	T	C	-0.0307059	-0.037	0.0085	1.5e-05	T2D	0.00205332	1.46054e-50	BMI	TRUE	C2	0.683
rs3104804	C	T	C	T	0.027186	0.032	0.017	0.067	T2D	0.00435195	4.188e-10	BMI	TRUE	C2	0.649
rs3127553	G	A	G	A	0.019433	-0.0074	0.0086	0.39	T2D	0.00206825	5.67679e-21	BMI	TRUE	C3	0.935
rs323791	G	A	G	A	-0.0443735	-0.072	0.027	0.0068	T2D	0.00553876	1.13356e-15	BMI	TRUE	C1	0.502
rs325299	C	T	C	T	0.0136673	0.0019	0.009	0.83	T2D	0.00228432	2.1896e-09	BMI	TRUE	C2	0.574
rs326889	T	C	T	C	-0.0145762	-0.0044	0.0086	0.61	T2D	0.00224769	8.87436e-11	BMI	TRUE	C2	0.63
rs329122	G	A	G	A	0.0111043	-0.036	0.0085	1.7e-05	T2D	0.00201669	3.66709e-08	BMI	TRUE	C4	0.979
rs33494	G	C	G	C	-0.0156436	-0.0039	0.011	0.71	T2D	0.00273318	1.04306e-08	BMI	FALSE
rs351784	G	C	G	C	-0.016841	-0.0055	0.012	0.64	T2D	0.0030167	2.36976e-08	BMI	FALSE
rs3736485	A	G	A	G	0.0140723	0.013	0.0084	0.13	T2D	0.00201747	3.05436e-12	BMI	TRUE	C2	0.713
rs3752904	T	C	T	C	-0.0135567	-0.029	0.0083	0.00042	T2D	0.00200117	1.24944e-11	BMI	TRUE	C1	0.711
rs3759558	A	G	A	G	0.0173528	0.035	0.011	0.0014	T2D	0.00289469	2.03867e-09	BMI	TRUE	C1	0.644
rs3776726	T	A	T	A	0.0189576	-0.056	0.01	3.4e-08	T2D	0.00281166	1.5569e-11	BMI	FALSE
rs3779273	A	G	A	G	-0.0165321	-0.026	0.0085	0.0025	T2D	0.0020226	2.99052e-16	BMI	TRUE	C1	0.546
rs3783890	C	T	C	T	-0.0193876	-0.018	0.011	0.1	T2D	0.00251553	1.28638e-14	BMI	TRUE	C2	0.727
rs3789220	A	G	A	G	0.0254995	0.023	0.02	0.24	T2D	0.00431461	3.42058e-09	BMI	TRUE	C2	0.649
rs3800229	T	G	T	G	0.0199916	0.013	0.0092	0.17	T2D	0.00210508	2.16343e-21	BMI	TRUE	C2	0.81
rs3807875	G	A	G	A	0.0121497	0.0011	0.0085	0.9	T2D	0.00207151	4.48756e-09	BMI	TRUE	C2	0.566
rs3808434	A	G	A	G	0.0126626	0.036	0.0084	2e-05	T2D	0.00206991	9.50646e-10	BMI	TRUE	C1	0.84
rs3810291	A	G	A	G	0.0224712	0.046	0.009	3.9e-07	T2D	0.002168	3.57964e-25	BMI	TRUE	C1	0.934
rs3817334	C	T	C	T	-0.0230025	-0.032	0.0084	0.00016	T2D	0.00202691	7.54264e-30	BMI	TRUE	C1	0.542
rs3819162	C	T	C	T	-0.0187819	-0.022	0.013	0.076	T2D	0.00292951	1.44319e-10	BMI	TRUE	C2	0.639
rs383349	A	G	A	G	0.0129885	0.021	0.0085	0.014	T2D	0.00213781	1.23518e-09	BMI	TRUE	C2	0.511
rs3849570	A	C	A	C	0.0118862	0.0035	0.0087	0.69	T2D	0.00209445	1.38602e-08	BMI	TRUE	C2	0.623
rs3888190	A	C	A	C	0.0323236	0.028	0.0085	0.0011	T2D	0.0020207	1.35742e-57	BMI	TRUE	C2	0.979
rs3935370	G	A	G	A	-0.0122011	-0.015	0.0087	0.091	T2D	0.00221938	3.85133e-08	BMI	TRUE	C2	0.624
rs39654	G	A	G	A	0.0147942	0.023	0.0084	0.007	T2D	0.0021887	1.38595e-11	BMI	TRUE	C2	0.496
rs40245	T	A	T	A	-0.013577	-0.015	0.0087	0.091	T2D	0.00225057	1.61233e-09	BMI	FALSE
rs4061073	G	A	G	A	0.0128883	0.0086	0.0091	0.35	T2D	0.00221214	5.67039e-09	BMI	TRUE	C2	0.676
rs4132610	C	T	C	T	-0.0123255	-0.0089	0.0086	0.3	T2D	0.00221697	2.7038e-08	BMI	TRUE	C2	0.681
rs426101	G	A	G	A	-0.0167818	-0.0084	0.012	0.47	T2D	0.00293008	1.01968e-08	BMI	TRUE	C2	0.66
rs4273371	C	T	C	T	0.0119378	0.016	0.0083	0.053	T2D	0.00199917	2.35237e-09	BMI	TRUE	C2	0.601
rs427943	C	A	C	A	0.0153207	0.024	0.0083	0.0041	T2D	0.00213553	7.27285e-13	BMI	TRUE	C1	0.52
rs4319547	G	A	G	A	0.0173347	0.009	0.0095	0.34	T2D	0.00237584	2.9598e-13	BMI	TRUE	C2	0.721
rs4342589	A	G	A	G	-0.0132407	-0.023	0.0085	0.0078	T2D	0.00220591	1.94468e-09	BMI	TRUE	C1	0.529
rs4382144	G	A	G	A	0.0144241	0.017	0.0083	0.036	T2D	0.00202599	1.08273e-12	BMI	TRUE	C2	0.658
rs4414033	G	A	G	A	-0.0151038	0.0056	0.0089	0.53	T2D	0.0022425	1.63635e-11	BMI	TRUE	C3	0.729
rs4432271	C	T	C	T	-0.0251513	-0.038	0.012	0.0017	T2D	0.00282976	6.21396e-19	BMI	TRUE	C1	0.538
rs4456769	T	C	T	C	0.0156787	0.023	0.0088	0.0092	T2D	0.00227126	5.08909e-12	BMI	TRUE	C2	0.535
rs4541689	G	A	G	A	-0.0122205	0.0077	0.0084	0.36	T2D	0.00219225	2.48325e-08	BMI	TRUE	C3	0.711
rs4541737	T	C	T	C	-0.0176903	-0.0014	0.014	0.92	T2D	0.0029028	1.0997e-09	BMI	TRUE	C2	0.577
rs456798	T	G	T	G	-0.0126916	-0.001	0.0085	0.91	T2D	0.00218179	5.989e-09	BMI	TRUE	C2	0.554
rs4596023	A	G	A	G	-0.0133238	-0.001	0.0095	0.92	T2D	0.00227789	4.94036e-09	BMI	TRUE	C2	0.564
rs4639270	T	C	T	C	-0.0119561	-0.0043	0.0084	0.61	T2D	0.00214913	2.64821e-08	BMI	TRUE	C2	0.639
rs4662565	C	A	C	A	0.0136054	0.002	0.0086	0.82	T2D	0.00227623	2.27057e-09	BMI	TRUE	C2	0.57
rs4715291	T	C	T	C	-0.0305474	0.044	0.03	0.14	T2D	0.00501306	1.10432e-09	BMI	TRUE	C3	0.566
rs4738873	A	G	A	G	0.0165044	0.018	0.011	0.11	T2D	0.00229159	5.92676e-13	BMI	TRUE	C2	0.66
rs4740619	T	C	T	C	0.0191108	0.012	0.0083	0.16	T2D	0.00200279	1.39984e-21	BMI	TRUE	C2	0.825
rs4743281	C	T	C	T	0.015044	0.0027	0.0086	0.75	T2D	0.00220534	9.00346e-12	BMI	TRUE	C2	0.565
rs4755217	A	G	A	G	0.0115663	0.029	0.0084	0.00068	T2D	0.00201084	8.81921e-09	BMI	TRUE	C1	0.707
rs4771122	A	G	A	G	-0.0207868	-0.017	0.0096	0.071	T2D	0.00237475	2.07259e-18	BMI	TRUE	C2	0.817
rs4788671	C	T	C	T	0.0122865	0.011	0.0087	0.22	T2D	0.0021408	9.51252e-09	BMI	TRUE	C2	0.672
rs4813427	T	A	T	A	0.0251949	0.051	0.014	0.00019	T2D	0.00402415	3.82695e-10	BMI	FALSE
rs4820408	T	G	T	G	0.015768	0.015	0.0085	0.073	T2D	0.00205079	1.48603e-14	BMI	TRUE	C2	0.738
rs4833079	C	T	C	T	-0.0140235	0.015	0.0086	0.087	T2D	0.00200362	2.57631e-12	BMI	TRUE	C3	0.896
rs4847370	C	T	C	T	0.0178637	0.023	0.014	0.094	T2D	0.00315064	1.42902e-08	BMI	TRUE	C2	0.607
rs4858523	G	A	G	A	-0.030091	0.0009	0.021	0.97	T2D	0.00532599	1.60601e-08	BMI	TRUE	C2	0.523
rs4860528	C	T	C	T	0.01317	0.035	0.0087	6.6e-05	T2D	0.002242	4.2487e-09	BMI	TRUE	C1	0.806
rs4869417	C	T	C	T	0.0169904	0.0018	0.0093	0.85	T2D	0.0021311	1.55372e-15	BMI	TRUE	C2	0.504
rs487152	C	A	C	A	-0.0151383	0.035	0.0083	2.1e-05	T2D	0.00200296	4.09469e-14	BMI	TRUE	C4	0.987
rs4912652	T	C	T	C	-0.0129462	0.0042	0.0083	0.61	T2D	0.00219786	3.85322e-09	BMI	TRUE	C3	0.633
rs492400	T	C	T	C	-0.014411	-0.0019	0.0084	0.82	T2D	0.00201439	8.42668e-13	BMI	TRUE	C2	0.543
rs4929923	C	T	C	T	0.0160593	0.021	0.0087	0.015	T2D	0.00208008	1.1585e-14	BMI	TRUE	C2	0.608
rs4971010	A	G	A	G	-0.0160941	-0.018	0.0085	0.03	T2D	0.00221473	3.67971e-13	BMI	TRUE	C2	0.692
rs4980661	A	G	A	G	-0.0143744	0.0022	0.0085	0.8	T2D	0.00223676	1.30616e-10	BMI	TRUE	C3	0.601
rs4984406	T	C	T	C	0.0113609	0.0084	0.0083	0.31	T2D	0.00202255	1.94193e-08	BMI	TRUE	C2	0.669
rs4985155	A	G	A	G	0.014963	0.0011	0.0088	0.9	T2D	0.00212055	1.71145e-12	BMI	TRUE	C2	0.512
rs4986044	C	T	C	T	0.0132156	0.021	0.0085	0.015	T2D	0.00199864	3.78465e-11	BMI	TRUE	C2	0.516
rs507929	G	A	G	A	-0.0128894	-0.018	0.0083	0.034	T2D	0.0021459	1.89548e-09	BMI	TRUE	C2	0.583
rs519844	C	T	C	T	0.0203337	0.02	0.013	0.14	T2D	0.0035118	7.0344e-09	BMI	TRUE	C2	0.686
rs543874	G	A	G	A	0.0447798	0.051	0.011	9.7e-07	T2D	0.00256661	3.62469e-68	BMI	TRUE	C2	0.817
rs555267	T	G	T	G	0.0146039	0.015	0.0089	0.1	T2D	0.00215404	1.20378e-11	BMI	TRUE	C2	0.69
rs6024460	A	G	A	G	0.0157959	0.015	0.011	0.15	T2D	0.00274717	8.93066e-09	BMI	TRUE	C2	0.671
rs6142096	A	G	A	G	0.0128369	0.027	0.0083	0.0013	T2D	0.00214861	2.30823e-09	BMI	TRUE	C1	0.663
rs615632	T	C	T	C	-0.0126342	-0.044	0.0086	2.8e-07	T2D	0.00206337	9.17876e-10	BMI	TRUE	C1	0.864
rs620985	G	A	G	A	0.0123451	0.0095	0.0085	0.26	T2D	0.00200238	7.03936e-10	BMI	TRUE	C2	0.684
rs621042	A	C	A	C	-0.0118575	0.0052	0.0084	0.54	T2D	0.00216413	4.27454e-08	BMI	TRUE	C3	0.606
rs6419734	T	C	T	C	0.0177937	0.026	0.012	0.026	T2D	0.00310328	9.81818e-09	BMI	TRUE	C2	0.567
rs6439664	G	A	G	A	-0.0168952	-0.017	0.0089	0.051	T2D	0.00222511	3.12654e-14	BMI	TRUE	C2	0.731
rs6448733	G	A	G	A	0.0128788	0.0046	0.0087	0.6	T2D	0.00228983	1.86206e-08	BMI	TRUE	C2	0.643
rs645040	G	T	G	T	-0.0170976	-0.032	0.01	0.0017	T2D	0.00264394	1.00164e-10	BMI	TRUE	C1	0.633
rs6469351	T	C	T	C	0.0136503	-0.0079	0.0088	0.37	T2D	0.0022736	1.92687e-09	BMI	TRUE	C3	0.746
rs6477694	C	T	C	T	0.0113771	0.021	0.0086	0.014	T2D	0.00202746	2.00583e-08	BMI	TRUE	C1	0.498
rs6494634	C	T	C	T	-0.0125152	-0.013	0.0089	0.14	T2D	0.00207069	1.50342e-09	BMI	TRUE	C2	0.656
rs6495366	C	T	C	T	0.011988	0.011	0.0085	0.2	T2D	0.00218656	4.19205e-08	BMI	TRUE	C2	0.67
rs657261	A	G	A	G	-0.024651	-0.012	0.016	0.44	T2D	0.00383875	1.34834e-10	BMI	TRUE	C2	0.676
rs6574961	T	C	T	C	0.0135747	0.023	0.0098	0.02	T2D	0.00236091	8.93554e-09	BMI	TRUE	C2	0.511
rs6597650	G	A	G	A	0.0183984	0.029	0.0087	0.001	T2D	0.00221788	1.08146e-16	BMI	TRUE	C1	0.588
rs6601541	C	T	C	T	-0.0138017	-0.041	0.0087	2.4e-06	T2D	0.00213455	1.00717e-10	BMI	TRUE	C1	0.885
rs6607336	A	C	A	C	0.01487	0.026	0.0092	0.0051	T2D	0.00244566	1.20059e-09	BMI	TRUE	C1	0.55
rs663129	A	G	A	G	0.0544266	0.043	0.0097	1.3e-05	T2D	0.00245727	1.06081e-108	BMI	TRUE	C2	1
rs6676190	C	T	C	T	0.0178581	0.024	0.009	0.0067	T2D	0.00214077	7.30953e-17	BMI	TRUE	C2	0.582
rs6677968	G	A	G	A	-0.0114234	-0.011	0.0085	0.19	T2D	0.00200211	1.15874e-08	BMI	TRUE	C2	0.655
rs6716536	C	T	C	T	0.0218006	0.0055	0.01	0.6	T2D	0.00231027	3.8579e-21	BMI	TRUE	C2	0.555
rs6730157	A	G	A	G	0.019571	-0.0034	0.01	0.73	T2D	0.00211316	2.01633e-20	BMI	TRUE	C3	0.735
rs6766759	A	C	A	C	0.0114457	0.017	0.0083	0.037	T2D	0.0020076	1.18966e-08	BMI	TRUE	C2	0.567
rs6768819	C	T	C	T	0.0115537	0.0091	0.0085	0.28	T2D	0.00204096	1.50561e-08	BMI	TRUE	C2	0.667
rs6787363	A	G	A	G	0.0141292	0.005	0.0087	0.57	T2D	0.00227722	5.48402e-10	BMI	TRUE	C2	0.649
rs681119	C	T	C	T	0.0129212	0.0056	0.0084	0.5	T2D	0.00202027	1.5972e-10	BMI	TRUE	C2	0.665
rs6841761	T	G	T	G	-0.0136561	-0.009	0.0083	0.28	T2D	0.0020305	1.75003e-11	BMI	TRUE	C2	0.717
rs6864049	A	G	A	G	-0.0139312	0.0011	0.0083	0.89	T2D	0.00202488	5.98401e-12	BMI	TRUE	C3	0.548
rs6870983	T	C	T	C	-0.0221794	-0.034	0.01	0.00093	T2D	0.0024566	1.74095e-19	BMI	TRUE	C1	0.58
rs6890277	G	A	G	A	0.0187515	0.033	0.0084	0.00011	T2D	0.00217787	7.305e-18	BMI	TRUE	C1	0.744
rs6907086	A	T	A	T	-0.0176119	-0.037	0.01	0.00034	T2D	0.00242331	3.65572e-13	BMI	FALSE
rs6970887	T	C	T	C	0.0180226	0.017	0.0097	0.081	T2D	0.00228437	3.03299e-15	BMI	TRUE	C2	0.741
rs7009799	T	C	T	C	-0.0163292	-0.015	0.0087	0.078	T2D	0.00221386	1.63234e-13	BMI	TRUE	C2	0.749
rs7031788	C	T	C	T	-0.0134948	-0.026	0.0097	0.0065	T2D	0.00237459	1.32358e-08	BMI	TRUE	C1	0.545
rs7038036	T	G	T	G	0.0134939	0.0045	0.0083	0.59	T2D	0.00215535	3.8331e-10	BMI	TRUE	C2	0.642
rs7045925	T	C	T	C	0.0146552	0.024	0.0093	0.01	T2D	0.00218138	1.83837e-11	BMI	TRUE	C2	0.495
rs7072873	T	C	T	C	-0.0129168	-0.0083	0.0083	0.32	T2D	0.00215582	2.07765e-09	BMI	TRUE	C2	0.699
rs7098825	T	C	T	C	-0.0251157	0.028	0.014	0.039	T2D	0.00335696	7.3389e-14	BMI	TRUE	C3	0.932
rs7102454	C	T	C	T	0.0168843	0.001	0.0088	0.91	T2D	0.00234427	5.91716e-13	BMI	TRUE	C3	0.54
rs7116641	G	T	G	T	0.0131325	0.045	0.0089	3.2e-07	T2D	0.00214681	9.524e-10	BMI	TRUE	C1	0.871
rs7117404	G	A	G	A	0.0209449	0.023	0.012	0.054	T2D	0.00284275	1.7342e-13	BMI	TRUE	C2	0.685
rs7122268	A	T	A	T	-0.0137053	-0.011	0.0083	0.19	T2D	0.00216056	2.24735e-10	BMI	FALSE
rs7123876	T	C	T	C	-0.0135754	0.052	0.0096	5.5e-08	T2D	0.00213383	1.99148e-10	BMI	TRUE	C4	0.944
rs7124275	C	T	C	T	-0.0139595	0.0048	0.0087	0.58	T2D	0.00230286	1.3458e-09	BMI	TRUE	C3	0.667
rs7138383	G	A	G	A	0.0170477	0.016	0.0099	0.11	T2D	0.00236726	5.95836e-13	BMI	TRUE	C2	0.719
rs7138803	G	A	G	A	-0.0286257	-0.031	0.0085	0.00022	T2D	0.00203578	6.56768e-45	BMI	TRUE	C2	0.838
rs7141420	T	C	T	C	0.0248541	0.029	0.0083	0.00055	T2D	0.00201807	7.44891e-35	BMI	TRUE	C2	0.722
rs714393	C	T	C	T	0.0123254	0.014	0.0082	0.094	T2D	0.00217309	1.41265e-08	BMI	TRUE	C2	0.651
rs7143963	T	C	T	C	0.0173066	0.045	0.011	4.3e-05	T2D	0.00246927	2.40349e-12	BMI	TRUE	C1	0.819
rs7161194	A	G	A	G	0.0159641	0.019	0.0094	0.047	T2D	0.00233829	8.65582e-12	BMI	TRUE	C2	0.652
rs7163790	C	T	C	T	-0.0135013	-0.015	0.0085	0.073	T2D	0.00217941	5.83052e-10	BMI	TRUE	C2	0.665
rs7164727	T	C	T	C	0.0145378	0.031	0.009	0.00068	T2D	0.0021412	1.12478e-11	BMI	TRUE	C1	0.701
rs7185735	G	A	G	A	0.0829809	0.12	0.0084	4.1e-44	T2D	0.00202339	1e-200	BMI	TRUE	C1	1
rs7200589	G	A	G	A	0.0159421	0.013	0.0099	0.2	T2D	0.00256058	4.78589e-10	BMI	TRUE	C2	0.712
rs7226371	G	A	G	A	0.0223191	0.031	0.011	0.0058	T2D	0.00269241	1.13591e-16	BMI	TRUE	C2	0.551
rs7235205	G	A	G	A	0.0133177	0.021	0.0092	0.02	T2D	0.0021139	2.97525e-10	BMI	TRUE	C2	0.535
rs7239114	A	G	A	G	0.0120287	0.022	0.0085	0.0099	T2D	0.00205726	5.00724e-09	BMI	TRUE	C1	0.521
rs7239575	C	T	C	T	-0.0203474	-0.025	0.0083	0.0027	T2D	0.00213692	1.70128e-21	BMI	TRUE	C2	0.65
rs7240718	T	C	T	C	-0.018987	0.0003	0.012	0.98	T2D	0.00327012	6.39063e-09	BMI	TRUE	C2	0.494
rs7243357	G	T	G	T	-0.0191091	-0.032	0.011	0.0031	T2D	0.00238232	1.04709e-15	BMI	TRUE	C1	0.55
rs7317857	A	G	A	G	0.013766	0.023	0.01	0.026	T2D	0.00250419	3.85884e-08	BMI	TRUE	C2	0.519
rs7318817	C	T	C	T	0.0168684	0.028	0.0085	0.001	T2D	0.00219207	1.41289e-14	BMI	TRUE	C1	0.609
rs732729	T	A	T	A	0.0181003	0.01	0.012	0.39	T2D	0.00291166	5.0834e-10	BMI	FALSE
rs733594	T	C	T	C	0.0148336	0.0093	0.0093	0.32	T2D	0.00225555	4.81747e-11	BMI	TRUE	C2	0.705
rs738140	G	A	G	A	-0.0147468	-0.016	0.009	0.07	T2D	0.0022922	1.24716e-10	BMI	TRUE	C2	0.677
rs7430139	A	G	A	G	0.0157656	0.0071	0.011	0.53	T2D	0.00271318	6.21948e-09	BMI	TRUE	C2	0.657
rs7485577	A	G	A	G	0.0181187	-0.012	0.0093	0.19	T2D	0.00239231	3.62648e-14	BMI	TRUE	C3	0.932
rs7492628	G	C	G	C	-0.0135959	0.022	0.009	0.015	T2D	0.00239512	1.3746e-08	BMI	FALSE
rs758278	G	A	G	A	0.013208	0.012	0.0086	0.16	T2D	0.00218765	1.56503e-09	BMI	TRUE	C2	0.691
rs7587034	C	T	C	T	0.0139827	0.03	0.0087	0.00051	T2D	0.00222646	3.38051e-10	BMI	TRUE	C1	0.702
rs758747	C	T	C	T	-0.0186016	-0.032	0.0095	0.00094	T2D	0.00243661	2.27239e-14	BMI	TRUE	C1	0.637
rs7596956	T	C	T	C	0.0172663	0.018	0.011	0.1	T2D	0.00303159	1.23038e-08	BMI	TRUE	C2	0.677
rs7599312	G	A	G	A	0.0207526	0.015	0.0093	0.1	T2D	0.00218895	2.52789e-21	BMI	TRUE	C2	0.831
rs7601692	T	G	T	G	0.011116	0.01	0.0084	0.22	T2D	0.00201513	3.46286e-08	BMI	TRUE	C2	0.657
rs7605556	G	T	G	T	0.0131437	0.0023	0.0085	0.79	T2D	0.00217392	1.48395e-09	BMI	TRUE	C2	0.585
rs7622739	G	A	G	A	0.0129151	0.013	0.0091	0.15	T2D	0.0023606	4.47254e-08	BMI	TRUE	C2	0.662
rs763464	T	C	T	C	-0.0129497	-0.0037	0.0088	0.67	T2D	0.00220836	4.52023e-09	BMI	TRUE	C2	0.624
rs7639882	C	T	C	T	-0.0128913	-0.018	0.0092	0.051	T2D	0.00234823	4.02444e-08	BMI	TRUE	C2	0.588
rs7647305	T	C	T	C	-0.0323718	-0.025	0.01	0.016	T2D	0.00253469	2.36513e-37	BMI	TRUE	C2	0.96
rs7651039	C	T	C	T	0.0112279	0.016	0.0083	0.052	T2D	0.0020043	2.12044e-08	BMI	TRUE	C2	0.582
rs7663212	G	A	G	A	-0.0136181	-0.02	0.0096	0.04	T2D	0.00231404	3.9806e-09	BMI	TRUE	C2	0.569
rs767278	C	G	C	G	-0.0165552	0.008	0.013	0.55	T2D	0.00282157	4.42821e-09	BMI	FALSE
rs7683987	T	A	T	A	0.0129398	0.0061	0.0085	0.47	T2D	0.00223191	6.72544e-09	BMI	FALSE
rs7716275	T	G	T	G	-0.0141506	-0.015	0.011	0.16	T2D	0.00259001	4.66804e-08	BMI	TRUE	C2	0.638
rs7733438	G	T	G	T	0.0214121	0.029	0.012	0.016	T2D	0.00326448	5.4121e-11	BMI	TRUE	C2	0.588
rs7748777	A	G	A	G	0.0125544	0.0002	0.0084	0.98	T2D	0.00201181	4.3664e-10	BMI	TRUE	C2	0.528
rs7751957	C	G	C	G	0.0160128	-0.067	0.011	1.6e-10	T2D	0.00242817	4.26448e-11	BMI	FALSE
rs7760082	A	G	A	G	-0.0125935	-0.012	0.0088	0.18	T2D	0.00226539	2.71168e-08	BMI	TRUE	C2	0.67
rs7775754	C	G	C	G	0.0148964	0.02	0.0086	0.021	T2D	0.00222786	2.28745e-11	BMI	FALSE
rs7779181	T	C	T	C	-0.0161485	-0.029	0.01	0.0036	T2D	0.0027006	2.23688e-09	BMI	TRUE	C1	0.57
rs7810260	G	A	G	A	-0.0126016	-0.012	0.008	0.12	T2D	0.00216935	6.28748e-09	BMI	TRUE	C2	0.693
rs7815140	G	C	G	C	0.0138888	0.023	0.0084	0.007	T2D	0.00218629	2.1159e-10	BMI	FALSE
rs7816188	G	A	G	A	0.0171427	-0.01	0.0086	0.23	T2D	0.00227889	5.37941e-14	BMI	TRUE	C3	0.926
rs7837587	C	T	C	T	0.0119774	0.038	0.0085	8.9e-06	T2D	0.00204601	4.79861e-09	BMI	TRUE	C1	0.848
rs7899106	A	G	A	G	-0.0348593	-0.02	0.018	0.28	T2D	0.00473948	1.90812e-13	BMI	TRUE	C2	0.752
rs7903146	T	C	T	C	-0.0202863	0.3	0.009	1e-200	T2D	0.00235852	7.88212e-18	BMI	TRUE	Junk	1
rs7969633	T	C	T	C	-0.0153942	-0.022	0.0095	0.018	T2D	0.00246507	4.23986e-10	BMI	TRUE	C2	0.568
rs7970953	G	A	G	A	-0.0123734	-0.0016	0.0091	0.86	T2D	0.00215981	1.01061e-08	BMI	TRUE	C2	0.584
rs7996851	A	G	A	G	-0.0120319	0.0012	0.0084	0.89	T2D	0.00215857	2.48926e-08	BMI	TRUE	C2	0.496
rs8060484	G	T	G	T	-0.0170094	-0.038	0.0092	3.9e-05	T2D	0.00237914	8.71637e-13	BMI	TRUE	C1	0.826
rs8069296	C	T	C	T	0.013692	0.013	0.011	0.23	T2D	0.00245039	2.30126e-08	BMI	TRUE	C2	0.642
rs8079215	T	C	T	C	0.0156583	0.031	0.0094	0.00093	T2D	0.00246912	2.27275e-10	BMI	TRUE	C1	0.663
rs8092503	G	A	G	A	0.0135366	0.0029	0.0096	0.76	T2D	0.0021962	7.10907e-10	BMI	TRUE	C2	0.604
rs8096568	C	G	C	G	0.019362	0.031	0.0087	0.00033	T2D	0.00223256	4.22557e-18	BMI	FALSE
rs8097783	A	G	A	G	-0.0384222	-0.034	0.016	0.034	T2D	0.00443777	4.80176e-18	BMI	TRUE	C2	0.845
rs810364	T	C	T	C	-0.0155806	-0.022	0.0095	0.019	T2D	0.00253653	8.1241e-10	BMI	TRUE	C2	0.573
rs8113277	G	A	G	A	-0.0265621	-0.018	0.016	0.27	T2D	0.00434541	9.79621e-10	BMI	TRUE	C2	0.721
rs8123881	G	A	G	A	0.0180796	0.0006	0.012	0.96	T2D	0.00254792	1.28561e-12	BMI	TRUE	C2	0.533
rs818902	C	A	C	A	0.0124602	0.011	0.0089	0.22	T2D	0.00221109	1.74745e-08	BMI	TRUE	C2	0.67
rs8192675	C	T	C	T	0.0134019	-0.075	0.0092	5.1e-16	T2D	0.00223343	1.9663e-09	BMI	TRUE	Junk	0.994
rs823094	T	G	T	G	0.0129817	0.019	0.0085	0.024	T2D	0.0020088	1.03048e-10	BMI	TRUE	C2	0.563
rs852056	C	T	C	T	-0.0158605	-0.017	0.0098	0.093	T2D	0.00250827	2.56096e-10	BMI	TRUE	C2	0.677
rs866050	G	A	G	A	-0.0160159	-0.014	0.01	0.17	T2D	0.00260082	7.3656e-10	BMI	TRUE	C2	0.706
rs867559	G	A	G	A	0.021086	0.036	0.01	0.00058	T2D	0.00224966	7.05259e-21	BMI	TRUE	C1	0.674
rs879620	C	T	C	T	-0.0249929	-0.0049	0.0088	0.58	T2D	0.00221459	1.54649e-29	BMI	TRUE	C3	0.672
rs889398	T	C	T	C	-0.0150595	-0.028	0.0084	0.00084	T2D	0.00202044	9.08375e-14	BMI	TRUE	C1	0.656
rs893006	A	C	A	C	0.0170271	0.011	0.0091	0.22	T2D	0.00208163	2.84583e-16	BMI	TRUE	C2	0.756
rs895330	C	G	C	G	0.0176071	0.0093	0.011	0.42	T2D	0.00294622	2.28485e-09	BMI	FALSE
rs897959	C	T	C	T	0.0130531	0.0056	0.0089	0.53	T2D	0.00223068	4.86767e-09	BMI	TRUE	C2	0.657
rs905938	C	T	C	T	0.0164758	-0.012	0.0094	0.21	T2D	0.00237395	3.91466e-12	BMI	TRUE	C3	0.89
rs914187	T	C	T	C	-0.0138055	-0.0061	0.0084	0.47	T2D	0.00200327	5.52043e-12	BMI	TRUE	C2	0.678
rs916389	A	G	A	G	-0.0171257	-0.015	0.011	0.15	T2D	0.00297647	8.73047e-09	BMI	TRUE	C2	0.698
rs925018	C	G	C	G	-0.0146308	-0.011	0.0089	0.23	T2D	0.00220564	3.28161e-11	BMI	FALSE
rs9275418	G	A	G	A	-0.0155122	0.043	0.0094	5.5e-06	T2D	0.00209475	1.30917e-13	BMI	TRUE	C4	0.988
rs9309664	A	G	A	G	-0.0129018	-0.0067	0.0086	0.44	T2D	0.00218012	3.2598e-09	BMI	TRUE	C2	0.676
rs9313052	C	G	C	G	0.0120414	0.011	0.0084	0.18	T2D	0.00217595	3.13291e-08	BMI	FALSE
rs9380215	A	G	A	G	-0.0212592	0.0088	0.016	0.59	T2D	0.00369535	8.76909e-09	BMI	TRUE	C3	0.549
rs9463594	G	A	G	A	0.0284136	0.028	0.018	0.12	T2D	0.00423751	2.01045e-11	BMI	TRUE	C2	0.688
rs9512706	A	C	A	C	-0.0129147	-0.0088	0.0088	0.32	T2D	0.00231033	2.27112e-08	BMI	TRUE	C2	0.686
rs9517337	C	A	C	A	-0.0125812	-0.014	0.0084	0.093	T2D	0.00214198	4.26379e-09	BMI	TRUE	C2	0.655
rs9538229	A	C	A	C	-0.0130374	-0.017	0.0083	0.04	T2D	0.00214747	1.27088e-09	BMI	TRUE	C2	0.612
rs954018	G	A	G	A	0.0117284	-0.026	0.009	0.0036	T2D	0.00210287	2.44245e-08	BMI	TRUE	C4	0.871
rs9549099	C	T	C	T	0.0168151	0.018	0.0093	0.057	T2D	0.00232771	5.05151e-13	BMI	TRUE	C2	0.7
rs9563576	C	T	C	T	0.0213276	0.041	0.011	0.00012	T2D	0.00250928	1.90471e-17	BMI	TRUE	C1	0.737
rs9595908	T	C	T	C	0.0121067	0.018	0.0086	0.041	T2D	0.0020115	1.75764e-09	BMI	TRUE	C2	0.565
rs9633835	A	G	A	G	-0.0140681	-0.026	0.0085	0.0023	T2D	0.0022266	2.6459e-10	BMI	TRUE	C1	0.605
rs964917	T	C	T	C	-0.0130169	0.0039	0.0085	0.65	T2D	0.00216047	1.69087e-09	BMI	TRUE	C3	0.606
rs9652638	C	T	C	T	0.0124956	0.028	0.0083	0.00072	T2D	0.00216198	7.48381e-09	BMI	TRUE	C1	0.691
rs972540	A	G	A	G	-0.0167042	-0.02	0.0093	0.032	T2D	0.00231602	5.49423e-13	BMI	TRUE	C2	0.655
rs977799	A	G	A	G	-0.0144442	-0.015	0.009	0.096	T2D	0.00206918	2.93803e-12	BMI	TRUE	C2	0.683
rs980183	G	A	G	A	0.0174986	0.032	0.0085	0.0002	T2D	0.00219523	1.57147e-15	BMI	TRUE	C1	0.73
rs980329	T	C	T	C	-0.0163316	-0.032	0.0095	0.00075	T2D	0.0025001	6.47278e-11	BMI	TRUE	C1	0.675
rs9824987	C	T	C	T	0.0223257	0.016	0.013	0.2	T2D	0.00298504	7.47754e-14	BMI	TRUE	C2	0.733
rs9831758	T	G	T	G	-0.0181479	-0.0079	0.012	0.5	T2D	0.00326942	2.84377e-08	BMI	TRUE	C2	0.663
rs9843336	A	G	A	G	0.028315	0.038	0.016	0.021	T2D	0.00488326	6.69593e-09	BMI	TRUE	C2	0.594
rs9845966	G	T	G	T	-0.0111947	-0.022	0.0083	0.0082	T2D	0.00202869	3.42523e-08	BMI	TRUE	C1	0.542
rs9856151	G	A	G	A	-0.018715	-0.025	0.0093	0.0071	T2D	0.00223992	6.53262e-17	BMI	TRUE	C2	0.585
rs9900011	G	C	G	C	-0.0317875	-0.026	0.022	0.24	T2D	0.00571347	2.64257e-08	BMI	FALSE
rs9904177	G	A	G	A	0.0152793	0.022	0.0093	0.017	T2D	0.00239649	1.82119e-10	BMI	TRUE	C2	0.562
rs9906903	C	T	C	T	0.014228	0.037	0.0096	9.8e-05	T2D	0.00255966	2.7206e-08	BMI	TRUE	C1	0.78
rs9910424	T	C	T	C	-0.0109926	-0.0049	0.0084	0.56	T2D	0.00201454	4.85256e-08	BMI	TRUE	C2	0.642
rs9914578	G	C	G	C	0.0149542	-0.023	0.01	0.027	T2D	0.00238098	3.37077e-10	BMI	FALSE
rs9921416	T	C	T	C	-0.0157246	0.0034	0.0084	0.69	T2D	0.00219669	8.16837e-13	BMI	TRUE	C3	0.725
rs9923491	T	G	T	G	0.0145928	-0.019	0.0094	0.048	T2D	0.00239103	1.03981e-09	BMI	TRUE	C3	0.819
rs9925964	G	A	G	A	-0.0144209	-0.014	0.0087	0.1	T2D	0.00203557	1.39592e-12	BMI	TRUE	C2	0.703
rs9931018	C	T	C	T	-0.0203263	-0.0015	0.01	0.88	T2D	0.00265162	1.77995e-14	BMI	TRUE	C3	0.567
rs9951687	G	C	G	C	-0.0186712	-0.032	0.014	0.024	T2D	0.00320771	5.85944e-09	BMI	FALSE
rs995258	C	A	C	A	-0.0133315	-0.011	0.0084	0.18	T2D	0.00216317	7.14064e-10	BMI	TRUE	C2	0.707

## Sheet: ST.3
CLUSTER-SPECIFIC MR IVW RESULTS SHOWING 0.5 AND 0.8 PROBABILITIES TO BELONG TO A CLUSTER
Cluster	OR	lci	uci	P_value	Nsnp	Probability
C3	0.699542	0.606278	0.807154	9.84857e-07	56	prob_50
C4	0.074888	0.0515337	0.108826	4.51018e-42	11	prob_50
C2	2.34465	2.20615	2.49184	1.183e-165	307	prob_50
C1	6.16839	5.58273	6.81549	7.43271e-280	85	prob_50
C3	0.612743	0.494106	0.759864	8.14975e-06	19	prob_80
C4	0.074888	0.0515337	0.108826	4.51018e-42	11	prob_80
C2	2.27517	2.00821	2.57761	3.97962e-38	24	prob_80
C1	6.49187	5.08539	8.28736	5.88726e-51	22	prob_80

## Sheet: ST.4
MR RESULTS OF BMI-PROTEIN ASSOCIATION IN UKB
protein	estimate	std.error	statistic	p.value	sex	conf.low	conf.high	p.fdr	clust_bmi_coeff	SE_MR	beta_MR	uci_MR	lci_MR	z_MR	pval_MR	p.fdr_MR	Cluster
MIA	-0.0711301	0.0706373	-1.00698	0.313952	All	-0.209577	0.0673164	0.70603	0.664602	0.106285	-0.107027	0.101292	-0.315346	-1.00698	0.313946	0.706015	C4
MESD	-0.134573	0.23274	-0.57821	0.563126	All	-0.590734	0.321589	0.841714	0.664602	0.350195	-0.202486	0.483895	-0.888867	-0.57821	0.563122	0.841703	C4
MET	0.285342	0.0386297	7.3866	1.53705e-13	All	0.209629	0.361055	1.34738e-10	0.664602	0.0581246	0.429343	0.543267	0.315419	7.3866	1.50633e-13	1.32045e-10	C4
METAP1	0.125111	0.0558927	2.23842	0.0251994	All	0.0155637	0.234659	0.269219	0.664602	0.0840996	0.18825	0.353085	0.023415	2.23842	0.0251937	0.269105	C4
METAP1D	-0.00475158	0.15743	-0.0301822	0.975922	All	-0.313309	0.303805	0.993258	0.664602	0.236879	-0.00714952	0.457133	-0.471432	-0.0301822	0.975922	0.993258	C4
METAP2	-0.11709	0.110155	-1.06295	0.287811	All	-0.33299	0.0988105	0.688202	0.664602	0.165746	-0.17618	0.148682	-0.501042	-1.06295	0.287804	0.688186	C4
MFAP3	-0.243156	0.0925014	-2.62867	0.00857541	All	-0.424455	-0.0618562	0.156935	0.664602	0.139183	-0.365867	-0.0930675	-0.638666	-2.62867	0.00857198	0.156873	C4
MFAP5	0.0325562	0.0833519	0.390587	0.696105	All	-0.130811	0.195923	0.892788	0.664602	0.125416	0.048986	0.294802	-0.19683	0.390587	0.696102	0.892786	C4
MFGE8	-0.073359	0.0841905	-0.871346	0.383571	All	-0.238369	0.0916513	0.752813	0.664602	0.126678	-0.11038	0.137909	-0.35867	-0.871346	0.383565	0.7528	C4
MGLL	-0.0559746	0.166133	-0.336927	0.736174	All	-0.381589	0.26964	0.911908	0.664602	0.249974	-0.0842227	0.405725	-0.574171	-0.336927	0.736172	0.911906	C4
MGMT	0.0872095	0.232163	0.375638	0.707188	All	-0.367822	0.542241	0.898726	0.664602	0.349327	0.131221	0.815901	-0.55346	0.375638	0.707186	0.898722	C4
MMP13	0.033739	0.0609789	0.55329	0.580068	All	-0.0857774	0.153256	0.847815	0.664602	0.0917526	0.0507658	0.230601	-0.129069	0.55329	0.580065	0.847809	C4
MICB_MICA	0.131433	0.281216	0.467373	0.640236	All	-0.419741	0.682607	0.872039	0.664602	0.423135	0.197762	1.02711	-0.631583	0.467373	0.640233	0.872032	C4
MIF	-0.111522	0.129887	-0.858605	0.390564	All	-0.366096	0.143053	0.756187	0.664602	0.195436	-0.167803	0.215253	-0.550858	-0.858605	0.390559	0.756164	C4
MILR1	0.176965	0.0956157	1.85079	0.0642072	All	-0.0104386	0.364368	0.401187	0.664602	0.143869	0.266272	0.548255	-0.0157117	1.85079	0.0641995	0.401083	C4
MITD1	-0.178452	0.183801	-0.970898	0.331605	All	-0.538695	0.181791	0.71598	0.664602	0.276558	-0.268509	0.273544	-0.810562	-0.970898	0.331599	0.715965	C4
MLN	-0.343947	0.171157	-2.00954	0.0444873	All	-0.679409	-0.00848469	0.343103	0.664602	0.257534	-0.517523	-0.0127573	-1.02229	-2.00954	0.0444803	0.343002	C4
MME	-0.632005	0.15547	-4.06512	4.81046e-05	All	-0.936721	-0.327289	0.0046339	0.664602	0.23393	-0.950952	-0.49245	-1.40946	-4.06512	4.80086e-05	0.00462465	C4
MMP1	-0.214723	0.170168	-1.26183	0.207018	All	-0.548247	0.118801	0.611397	0.664602	0.256046	-0.323086	0.178764	-0.824935	-1.26183	0.20701	0.61137	C4
MMP10	-0.0418391	0.113647	-0.368149	0.712764	All	-0.264583	0.180905	0.902251	0.664602	0.171	-0.0629536	0.272207	-0.398114	-0.368149	0.712762	0.902249	C4
MMP12	-0.0880483	0.104967	-0.838819	0.401576	All	-0.29378	0.117683	0.762094	0.664602	0.15794	-0.132483	0.177079	-0.442045	-0.838819	0.401571	0.762073	C4
MERTK	0.190665	0.0488517	3.90294	9.51939e-05	All	0.0949178	0.286413	0.00751775	0.664602	0.0735053	0.286887	0.430957	0.142816	3.90294	9.5031e-05	0.00750488	C4
MEPE	0.0797205	0.048096	1.65753	0.0974209	All	-0.0145459	0.173987	0.471258	0.664602	0.0723681	0.119952	0.261794	-0.0218893	1.65753	0.0974127	0.471211	C4
MAVS	-0.0809665	0.170972	-0.473567	0.635811	All	-0.416065	0.254132	0.870328	0.664602	0.257254	-0.121827	0.382391	-0.626045	-0.473567	0.635809	0.870319	C4
MANSC1	0.103624	0.0525311	1.97262	0.0485466	All	0.00066458	0.206583	0.355225	0.664602	0.0790415	0.155919	0.31084	0.00099712	1.97262	0.0485394	0.355172	C4
MAP2K6	-0.0154183	0.190076	-0.0811164	0.93535	All	-0.387961	0.357125	0.97936	0.664602	0.286001	-0.0231993	0.537362	-0.58376	-0.0811164	0.935349	0.979359	C4
MAP3K5	0.101351	0.182919	0.554078	0.579529	All	-0.257163	0.459866	0.847815	0.664602	0.275231	0.152499	0.691952	-0.386953	0.554078	0.579526	0.847809	C4
MAP4K5	-0.213612	0.210989	-1.01243	0.311339	All	-0.627142	0.199919	0.703061	0.664602	0.317467	-0.321413	0.300822	-0.943648	-1.01243	0.311332	0.70303	C4
MAPK9	-0.0343335	0.0825217	-0.416055	0.677372	All	-0.196073	0.127406	0.888286	0.664602	0.124167	-0.0516603	0.191707	-0.295028	-0.416055	0.67737	0.888283	C4
MAPT	-0.132252	0.097798	-1.35229	0.176289	All	-0.323932	0.0594288	0.573201	0.664602	0.147153	-0.198994	0.0894255	-0.487413	-1.35229	0.176281	0.573175	C4
MARCO	-0.0314411	0.050789	-0.619054	0.535885	All	-0.130986	0.0681035	0.829665	0.664602	0.0764202	-0.0473082	0.102475	-0.197092	-0.619054	0.535881	0.82966	C4
MASP1	-0.149637	0.0448181	-3.33876	0.000842346	All	-0.237478	-0.0617948	0.0348302	0.664602	0.067436	-0.225152	-0.0929778	-0.357327	-3.33876	0.000841541	0.0347969	C4
MATN2	-0.037834	0.0568519	-0.665484	0.505745	All	-0.149262	0.0735936	0.815556	0.664602	0.0855428	-0.0569274	0.110737	-0.224591	-0.665484	0.505741	0.815549	C4
MATN3	0.147363	0.0606474	2.42983	0.0151103	All	0.0284964	0.26623	0.210584	0.664602	0.0912538	0.221731	0.400589	0.0428741	2.42983	0.0151058	0.21052	C4
MEP1B	0.0108136	0.226468	0.0477489	0.961917	All	-0.433056	0.454684	0.988672	0.664602	0.340758	0.0162708	0.684157	-0.651615	0.0477489	0.961916	0.988672	C4
MAX	-0.0596446	0.196959	-0.302827	0.762024	All	-0.445678	0.326389	0.921462	0.664602	0.296357	-0.0897448	0.491115	-0.670605	-0.302827	0.762022	0.921458	C4
MB	-0.0396287	0.102864	-0.385253	0.700052	All	-0.241238	0.161981	0.894096	0.664602	0.154775	-0.0596277	0.243732	-0.362987	-0.385253	0.70005	0.894091	C4
MCAM	0.0667876	0.0638353	1.04625	0.295453	All	-0.0583273	0.191902	0.691607	0.664602	0.0960504	0.100493	0.288752	-0.0877662	1.04625	0.295446	0.691591	C4
MCFD2	-0.0805641	0.0841452	-0.957441	0.338351	All	-0.245486	0.0843574	0.720646	0.664602	0.12661	-0.121222	0.126934	-0.369377	-0.957441	0.338345	0.720622	C4
MDGA1	0.0848592	0.132975	0.63816	0.523373	All	-0.175766	0.345485	0.823229	0.664602	0.200082	0.127684	0.519844	-0.264476	0.63816	0.523369	0.823214	C4
MDK	0.0664725	0.0987957	0.672828	0.501061	All	-0.127163	0.260108	0.811735	0.664602	0.148654	0.100018	0.39138	-0.191343	0.672828	0.501057	0.811729	C4
MED18	-0.127232	0.142683	-0.891712	0.372553	All	-0.406886	0.152421	0.746639	0.664602	0.21469	-0.191441	0.22935	-0.612233	-0.891712	0.372547	0.746628	C4
MEGF10	-0.100077	0.0749255	-1.33568	0.181662	All	-0.246928	0.0467748	0.582095	0.664602	0.112737	-0.150581	0.0703843	-0.371547	-1.33568	0.181654	0.58204	C4
MEGF9	-0.0681178	0.0401879	-1.69498	0.0900871	All	-0.146885	0.0106491	0.457626	0.664602	0.0604692	-0.102494	0.0160255	-0.221014	-1.69498	0.090079	0.457537	C4
MANF	-0.152911	0.230041	-0.664713	0.506238	All	-0.603783	0.297961	0.815751	0.664602	0.346133	-0.230079	0.448342	-0.908501	-0.664713	0.506234	0.815744	C4
MMP3	0.164116	0.0935147	1.75498	0.0792708	All	-0.019169	0.347402	0.43594	0.664602	0.140708	0.246939	0.522727	-0.028848	1.75498	0.0792628	0.435896	C4
SRPK2	0.0377223	0.160002	0.235762	0.813618	All	-0.275875	0.35132	0.943697	0.664602	0.240748	0.0567593	0.528625	-0.415107	0.235762	0.813617	0.943693	C4
NADK	0.00983977	0.108694	0.0905271	0.927869	All	-0.203197	0.222876	0.976334	0.664602	0.163548	0.0148055	0.335359	-0.305748	0.0905271	0.927868	0.976333	C4
NAMPT	-0.111033	0.102215	-1.08627	0.277366	All	-0.311371	0.0893048	0.67897	0.664602	0.153799	-0.167068	0.134379	-0.468514	-1.08627	0.277359	0.678931	C4
NBL1	0.0600901	0.0513087	1.17115	0.241546	All	-0.0404731	0.160653	0.647758	0.664602	0.0772022	0.0904152	0.241731	-0.0609011	1.17115	0.241539	0.647736	C4
NBN	0.0402473	0.101958	0.394743	0.693034	All	-0.159587	0.240082	0.891698	0.664602	0.153412	0.0605585	0.361247	-0.24013	0.394743	0.693032	0.891695	C4
NCAM1	-0.12013	0.0594242	-2.02157	0.0432282	All	-0.236599	-0.00366061	0.340466	0.664602	0.0894132	-0.180755	-0.00550476	-0.356005	-2.02157	0.0432213	0.340411	C4
ST6GAL1	0.0668626	0.0578655	1.15548	0.2479	All	-0.0465517	0.180277	0.653758	0.664602	0.0870679	0.100606	0.271259	-0.0700476	1.15548	0.247893	0.653739	C4
ST3GAL1	0.156106	0.0816959	1.91082	0.056035	All	-0.00401473	0.316227	0.380494	0.664602	0.122925	0.234887	0.475819	-0.00604523	1.91082	0.0560275	0.380398	C4
SSC5D	-0.302792	0.0847572	-3.57247	0.000354068	All	-0.468914	-0.136671	0.0190415	0.664602	0.127531	-0.4556	-0.205639	-0.70556	-3.57247	0.000353633	0.0190181	C4
SSC4D	-0.606241	0.238799	-2.53871	0.0111303	All	-1.07428	-0.138203	0.179353	0.664602	0.359312	-0.912186	-0.207936	-1.61644	-2.53871	0.0111263	0.17929	C4
SSB	0.136726	0.110338	1.23916	0.215294	All	-0.0795319	0.352984	0.618784	0.664602	0.166021	0.205726	0.531127	-0.119674	1.23916	0.215286	0.618746	C4
SPINK6	0.0104464	0.10528	0.0992244	0.920961	All	-0.195899	0.216792	0.975682	0.664602	0.158411	0.0157182	0.326203	-0.294767	0.0992244	0.92096	0.975681	C4
SRP14	-0.115717	0.116531	-0.993014	0.320709	All	-0.344114	0.11268	0.709296	0.664602	0.17534	-0.174115	0.169551	-0.517782	-0.993014	0.320703	0.709282	C4
SRC	-0.111193	0.228704	-0.486187	0.626837	All	-0.559445	0.337059	0.865867	0.664602	0.344122	-0.167308	0.507172	-0.841788	-0.486187	0.626834	0.865863	C4
SPRY2	0.0128483	0.174068	0.0738121	0.94116	All	-0.328318	0.354015	0.982168	0.664602	0.261913	0.0193323	0.532682	-0.494017	0.0738121	0.94116	0.982168	C4
SPP1	0.106144	0.0879042	1.2075	0.227248	All	-0.066145	0.278433	0.630997	0.664602	0.132266	0.159711	0.418952	-0.0995306	1.2075	0.227241	0.630977	C4
SPON2	0.0541082	0.0673624	0.803242	0.42184	All	-0.0779195	0.186136	0.775068	0.664602	0.101357	0.0814145	0.280075	-0.117246	0.803242	0.421835	0.775059	C4
SPON1	-0.0434512	0.062509	-0.695119	0.486985	All	-0.165967	0.0790642	0.804294	0.664602	0.0940548	-0.0653793	0.118968	-0.249727	-0.695119	0.48698	0.804281	C4
SPOCK1	-0.0577927	0.0486994	-1.18672	0.235344	All	-0.153242	0.0376562	0.639877	0.664602	0.073276	-0.0869585	0.0566625	-0.230579	-1.18672	0.235336	0.639854	C4
SPINT2	0.079591	0.0782354	1.01733	0.309004	All	-0.0737475	0.23293	0.702478	0.664602	0.117718	0.119758	0.350484	-0.110969	1.01733	0.308997	0.702447	C4
SPINT1	-0.114825	0.049367	-2.32595	0.0200266	All	-0.211583	-0.0180675	0.242429	0.664602	0.0742806	-0.172773	-0.0271828	-0.318363	-2.32595	0.0200214	0.242293	C4
NAAA	-0.246795	0.111396	-2.21549	0.0267326	All	-0.465127	-0.028464	0.273222	0.664602	0.167613	-0.371343	-0.0428226	-0.699864	-2.21549	0.0267268	0.273162	C4
MZT1	0.0387569	0.098416	0.393807	0.693726	All	-0.154135	0.231649	0.891826	0.664602	0.148083	0.058316	0.348558	-0.231926	0.393807	0.693723	0.891822	C4
MSMB	-0.100432	0.136725	-0.734558	0.462613	All	-0.368408	0.167543	0.793905	0.664602	0.205725	-0.151117	0.252103	-0.554337	-0.734558	0.462608	0.793897	C4
MMP8	-0.22508	0.143644	-1.56693	0.11714	All	-0.506617	0.0564575	0.501995	0.664602	0.216135	-0.338668	0.0849572	-0.762294	-1.56693	0.117132	0.501954	C4
MMP9	-0.170278	0.118053	-1.44239	0.149201	All	-0.401657	0.061101	0.540574	0.664602	0.177629	-0.256211	0.0919427	-0.604364	-1.44239	0.149192	0.540539	C4
MNDA	-0.0365014	0.190851	-0.191256	0.848326	All	-0.410562	0.337559	0.956849	0.664602	0.287165	-0.0549222	0.507922	-0.617767	-0.191256	0.848325	0.956848	C4
MOG	0.070358	0.0637096	1.10436	0.269446	All	-0.0545105	0.195226	0.671967	0.664602	0.0958613	0.105865	0.293753	-0.0820232	1.10436	0.269439	0.671949	C4
MPHOSPH8	0.110283	0.142979	0.771322	0.440521	All	-0.169951	0.390516	0.784366	0.664602	0.215135	0.165938	0.587602	-0.255726	0.771322	0.440516	0.784348	C4
MPI	-0.0603763	0.162939	-0.370546	0.710978	All	-0.37973	0.258978	0.900977	0.664602	0.245167	-0.0908458	0.389682	-0.571374	-0.370546	0.710976	0.900972	C4
MPIG6B	0.0590429	0.146099	0.40413	0.686119	All	-0.227305	0.345391	0.889881	0.664602	0.219829	0.0888395	0.519704	-0.342025	0.40413	0.686117	0.889878	C4
MPO	-0.016434	0.091299	-0.180002	0.857152	All	-0.195377	0.162509	0.959572	0.664602	0.137374	-0.0247275	0.244525	-0.29398	-0.180002	0.857151	0.95957	C4
MRPL46	-0.0497346	0.0519368	-0.957598	0.338272	All	-0.151529	0.0520597	0.720646	0.664602	0.0781473	-0.0748337	0.078335	-0.228002	-0.957598	0.338266	0.720622	C4
MSLN	-0.154128	0.115107	-1.339	0.180579	All	-0.379733	0.0714774	0.580263	0.664602	0.173197	-0.23191	0.107555	-0.571376	-1.339	0.180571	0.580237	C4
MZB1	-0.13187	0.100631	-1.31042	0.19006	All	-0.329103	0.065364	0.590932	0.664602	0.151416	-0.198419	0.0983561	-0.495194	-1.31042	0.190052	0.590908	C4
MSR1	-0.15525	0.0909405	-1.70716	0.0878005	All	-0.33349	0.0229902	0.453571	0.664602	0.136835	-0.233599	0.0345973	-0.501794	-1.70716	0.0877924	0.453523	C4
MSRA	-0.123663	0.138785	-0.891043	0.372912	All	-0.395677	0.14835	0.746923	0.664602	0.208824	-0.186071	0.223224	-0.595367	-0.891043	0.372906	0.746899	C4
MSTN	-0.207352	0.0995592	-2.0827	0.0372849	All	-0.402485	-0.0122198	0.318557	0.664602	0.149803	-0.311995	-0.0183813	-0.605608	-2.0827	0.0372783	0.3185	C4
MTPN	-0.00685207	0.0625188	-0.1096	0.912727	All	-0.129387	0.115682	0.972644	0.664602	0.0940695	-0.01031	0.174066	-0.194686	-0.1096	0.912727	0.972643	C4
MUC13	-0.351435	0.0954166	-3.68316	0.000230675	All	-0.538448	-0.164422	0.01385	0.664602	0.14357	-0.52879	-0.247394	-0.810187	-3.68316	0.000230357	0.0138309	C4
MUC16	-0.0696023	0.359694	-0.193504	0.846565	All	-0.774589	0.635384	0.956313	0.664602	0.541217	-0.104728	0.956057	-1.16551	-0.193504	0.846564	0.956312	C4
MVK	-0.440014	0.151773	-2.89915	0.00374387	All	-0.737484	-0.142544	0.0956815	0.664602	0.228367	-0.662071	-0.214471	-1.10967	-2.89915	0.00374174	0.0956222	C4
MYO9B	0.0653478	0.124847	0.523423	0.600683	All	-0.179348	0.310043	0.858286	0.664602	0.187852	0.0983262	0.466517	-0.269864	0.523423	0.60068	0.858282	C4
MYOC	0.163181	0.086643	1.88337	0.0596574	All	-0.00663606	0.332998	0.388366	0.664602	0.130368	0.245532	0.501054	-0.00998971	1.88337	0.0596498	0.388241	C4
MMP7	-0.258721	0.0929794	-2.78256	0.00539583	All	-0.440957	-0.0764845	0.119515	0.664602	0.139902	-0.389287	-0.115078	-0.663496	-2.78256	0.00539319	0.119447	C4
LAT	-0.0328873	0.147136	-0.223516	0.823135	All	-0.321269	0.255494	0.946626	0.664602	0.22139	-0.0494842	0.38444	-0.483408	-0.223516	0.823134	0.946624	C4
KYNU	-0.32538	0.0892929	-3.64396	0.000268831	All	-0.500391	-0.150369	0.0156549	0.664602	0.134355	-0.489586	-0.226249	-0.752923	-3.64396	0.000268475	0.0156102	C4
L1CAM	0.0891222	0.0554156	1.60825	0.107788	All	-0.0194904	0.197735	0.488837	0.664602	0.0833816	0.134099	0.297527	-0.0293294	1.60825	0.10778	0.4888	C4
LACTB2	0.00707996	0.12621	0.0560967	0.955265	All	-0.240287	0.254447	0.985623	0.664602	0.189903	0.0106529	0.382863	-0.361557	0.0560967	0.955265	0.985623	C4
LAG3	0.0348773	0.0779047	0.447692	0.654378	All	-0.117813	0.187568	0.877067	0.664602	0.11722	0.0524785	0.28223	-0.177273	0.447692	0.654375	0.877064	C4
LAIR1	0.106909	0.0718813	1.4873	0.136944	All	-0.0339757	0.247794	0.525623	0.664602	0.108157	0.160862	0.372849	-0.0511258	1.4873	0.136936	0.525555	C4
LAIR2	0.478144	0.199397	2.39795	0.016492	All	0.0873328	0.868955	0.21723	0.664602	0.300025	0.719444	1.30749	0.131395	2.39795	0.0164872	0.217071	C4
LAMA4	0.0259331	0.0644664	0.402273	0.687485	All	-0.100419	0.152285	0.889881	0.664602	0.097	0.0390205	0.229141	-0.1511	0.402273	0.687483	0.889878	C4
LAMP2	-0.146657	0.037298	-3.93204	8.4377e-05	All	-0.21976	-0.0735545	0.007112	0.664602	0.0561208	-0.220669	-0.110672	-0.330666	-3.93204	8.42283e-05	0.00709947	C4
LAMP3	0.129215	0.107807	1.19857	0.230703	All	-0.082084	0.340513	0.634289	0.664602	0.162213	0.194424	0.512362	-0.123514	1.19857	0.230696	0.634265	C4
LAP3	0.0612006	0.0907829	0.674142	0.500225	All	-0.116731	0.239132	0.810897	0.664602	0.136597	0.0920861	0.359817	-0.175645	0.674142	0.500221	0.810885	C4
LGALS1	0.120954	0.0695954	1.73795	0.0822268	All	-0.0154508	0.257358	0.441646	0.664602	0.104717	0.181994	0.38724	-0.023252	1.73795	0.0822188	0.441552	C4
LAT2	-0.129043	0.236021	-0.546742	0.584559	All	-0.591637	0.333551	0.848552	0.664602	0.355132	-0.194166	0.501893	-0.890225	-0.546742	0.584556	0.848547	C4
LAYN	0.13949	0.0645909	2.15959	0.0308106	All	0.0128941	0.266086	0.292934	0.664602	0.0971874	0.209885	0.400372	0.0193977	2.15959	0.0308044	0.292875	C4
LBP	-0.0633521	0.113922	-0.556102	0.578144	All	-0.286635	0.15993	0.846802	0.664602	0.171414	-0.0953234	0.240647	-0.431294	-0.556102	0.578141	0.846797	C4
LBR	-0.0259021	0.134554	-0.192502	0.84735	All	-0.289624	0.23782	0.956706	0.664602	0.202459	-0.0389738	0.357845	-0.435793	-0.192502	0.847349	0.956705	C4
LCN2	-0.0643968	0.0728728	-0.883686	0.376871	All	-0.207225	0.0784314	0.749291	0.664602	0.109649	-0.0968952	0.118017	-0.311807	-0.883686	0.376865	0.749263	C4
LDLR	0.0469317	0.105081	0.446624	0.655149	All	-0.159023	0.252887	0.877067	0.664602	0.158111	0.0706163	0.380514	-0.239282	0.446624	0.655146	0.877064	C4
LEFTY2	-0.251713	0.100592	-2.50231	0.0123428	All	-0.448871	-0.0545556	0.191161	0.664602	0.151357	-0.378743	-0.0820821	-0.675403	-2.50231	0.0123387	0.191097	C4
LEP	-0.300507	0.189165	-1.5886	0.112159	All	-0.671262	0.070249	0.494684	0.664602	0.284628	-0.452161	0.105711	-1.01003	-1.5886	0.112151	0.494616	C4
LEPR	0.149233	0.0618684	2.4121	0.0158658	All	0.0279727	0.270493	0.213969	0.664602	0.093091	0.224544	0.407003	0.0420861	2.4121	0.0158611	0.213905	C4
KYAT1	-0.054929	0.108834	-0.504703	0.61377	All	-0.26824	0.158382	0.861263	0.664602	0.163759	-0.0826495	0.238317	-0.403616	-0.504703	0.613767	0.861259	C4
KRT5	0.0294963	0.0948818	0.310874	0.755898	All	-0.156469	0.215461	0.919412	0.664602	0.142765	0.0443819	0.324201	-0.235437	0.310874	0.755897	0.91941	C4
KLK12	-0.227065	0.26001	-0.873295	0.382508	All	-0.736675	0.282544	0.752434	0.664602	0.391226	-0.341656	0.425148	-1.10846	-0.873295	0.382502	0.752421	C4
KIFBP	-0.0249012	0.157429	-0.158174	0.874321	All	-0.333457	0.283655	0.963876	0.664602	0.236878	-0.0374678	0.426812	-0.501748	-0.158174	0.87432	0.963873	C4
KIR2DL3	0.0586656	0.145152	0.404167	0.686092	All	-0.225827	0.343158	0.889881	0.664602	0.218404	0.0882718	0.516344	-0.339801	0.404167	0.68609	0.889878	C4
KIR3DL1	0.0451791	0.231662	0.195022	0.845377	All	-0.40887	0.499229	0.955929	0.664602	0.348573	0.0679793	0.751182	-0.615223	0.195022	0.845376	0.955926	C4
KIRREL2	0.0644147	0.0747343	0.861917	0.388739	All	-0.0820618	0.210891	0.755249	0.664602	0.11245	0.0969223	0.317324	-0.123479	0.861917	0.388733	0.755239	C4
KIT	0.312314	0.0573455	5.44619	5.17777e-08	All	0.199919	0.424709	2.52158e-05	0.664602	0.0862854	0.469927	0.639046	0.300807	5.44619	5.14606e-08	2.50613e-05	C4
KITLG	0.115993	0.0725463	1.59888	0.109856	All	-0.0261955	0.258181	0.491655	0.664602	0.109158	0.17453	0.388479	-0.0394192	1.59888	0.109848	0.491575	C4
KLB	0.244952	0.140429	1.7443	0.0811141	All	-0.030285	0.520188	0.439275	0.664602	0.211299	0.368569	0.782714	-0.0455762	1.7443	0.081106	0.439181	C4
KLK1	-0.267198	0.242112	-1.10361	0.269768	All	-0.741728	0.207332	0.672313	0.664602	0.364296	-0.402042	0.311978	-1.11606	-1.10361	0.269761	0.672296	C4
KLK10	0.00625233	0.077835	0.0803281	0.935977	All	-0.146301	0.158806	0.97944	0.664602	0.117115	0.00940764	0.238954	-0.220138	0.0803281	0.935976	0.97944	C4
KLK11	-0.0244751	0.0583589	-0.41939	0.674934	All	-0.138856	0.0899062	0.886628	0.664602	0.0878103	-0.0368268	0.135281	-0.208935	-0.41939	0.674931	0.886625	C4
KRT19	-0.111515	0.12905	-0.864123	0.387525	All	-0.36445	0.141419	0.754589	0.664602	0.194177	-0.167793	0.212794	-0.54838	-0.864123	0.38752	0.754567	C4
KLK13	-0.110672	0.083944	-1.31841	0.187376	All	-0.275199	0.0538549	0.58869	0.664602	0.126307	-0.166524	0.0810379	-0.414086	-1.31841	0.187368	0.588643	C4
KLK14	-0.00602478	0.0898387	-0.0670622	0.946533	All	-0.182105	0.170056	0.983309	0.664602	0.135177	-0.00906525	0.255881	-0.274012	-0.0670622	0.946532	0.983308	C4
KLK4	-0.10867	0.117508	-0.924791	0.355081	All	-0.338981	0.121641	0.733671	0.664602	0.176809	-0.163511	0.183034	-0.510057	-0.924791	0.355075	0.733648	C4
KLK6	0.0434325	0.0584026	0.743675	0.457077	All	-0.0710344	0.157899	0.791355	0.664602	0.087876	0.0653512	0.237588	-0.106886	0.743675	0.457073	0.791338	C4
KLK8	0.0362045	0.0670084	0.540297	0.588995	All	-0.0951296	0.167539	0.85158	0.664602	0.100825	0.0544754	0.252092	-0.143141	0.540297	0.588992	0.851576	C4
KLRB1	0.11551	0.0730222	1.58184	0.113694	All	-0.0276113	0.258631	0.496335	0.664602	0.109874	0.173803	0.389155	-0.0415496	1.58184	0.113686	0.496299	C4
KLRD1	0.076787	0.0902903	0.850446	0.395083	All	-0.100179	0.253753	0.758222	0.664602	0.135856	0.115538	0.381817	-0.15074	0.850446	0.395077	0.75821	C4
KRT14	0.0487777	0.0536286	0.909548	0.363067	All	-0.0563323	0.153888	0.737893	0.664602	0.0806928	0.0733939	0.231552	-0.0847639	0.909548	0.363061	0.737881	C4
KRT18	-0.72022	0.162988	-4.41884	9.95033e-06	All	-1.03967	-0.400768	0.00147838	0.664602	0.245242	-1.08369	-0.603012	-1.56436	-4.41884	9.92306e-06	0.00147433	C4
KEL	0.0640548	0.0670701	0.955043	0.339562	All	-0.0674001	0.19551	0.721857	0.664602	0.100918	0.0963808	0.294179	-0.101418	0.955043	0.339556	0.721829	C4
LGALS3	0.092253	0.0577569	1.59726	0.110215	All	-0.0209485	0.205454	0.492179	0.664602	0.0869045	0.138809	0.309142	-0.0315235	1.59726	0.110207	0.492142	C4
LY75	0.0304462	0.0741346	0.410688	0.681304	All	-0.114855	0.175747	0.888996	0.664602	0.111547	0.0458112	0.264444	-0.172822	0.410688	0.681301	0.888993	C4
LSM1	-0.0415139	0.103601	-0.40071	0.688636	All	-0.244568	0.16154	0.890413	0.664602	0.155884	-0.0624643	0.243068	-0.367997	-0.40071	0.688634	0.890408	C4
LSP1	-0.0155535	0.0778469	-0.199796	0.841641	All	-0.168131	0.137024	0.955182	0.664602	0.117133	-0.0234027	0.206178	-0.252984	-0.199796	0.84164	0.955181	C4
LTA	0.0833369	0.0771234	1.08057	0.279897	All	-0.0678221	0.234496	0.682072	0.664602	0.116045	0.125394	0.352841	-0.102053	1.08057	0.27989	0.682056	C4
LTA4H	0.0423182	0.114879	0.368371	0.712599	All	-0.182841	0.267478	0.902251	0.664602	0.172854	0.0636745	0.402469	-0.27512	0.368371	0.712597	0.902249	C4
LTBP2	0.0586645	0.0616744	0.951197	0.34151	All	-0.0622151	0.179544	0.722228	0.664602	0.092799	0.0882702	0.270156	-0.0936159	0.951197	0.341504	0.7222	C4
LTBP3	-0.123363	0.1026	-1.20237	0.229227	All	-0.324456	0.0777291	0.632691	0.664602	0.154378	-0.18562	0.116961	-0.488201	-1.20237	0.22922	0.632664	C4
LTBR	0.0523294	0.0538375	0.971988	0.331063	All	-0.0531902	0.157849	0.71559	0.664602	0.0810072	0.078738	0.237512	-0.0800361	0.971988	0.331057	0.715561	C4
LTO1	0.0838504	0.0782731	1.07125	0.284062	All	-0.0695621	0.237263	0.685183	0.664602	0.117774	0.126166	0.357004	-0.104672	1.07125	0.284055	0.685148	C4
LXN	0.0484098	0.127635	0.379282	0.70448	All	-0.201751	0.29857	0.896983	0.664602	0.192048	0.0728403	0.449254	-0.303573	0.379282	0.704478	0.896979	C4
LY6D	-0.0182759	0.0722358	-0.253004	0.800267	All	-0.159856	0.123304	0.937705	0.664602	0.10869	-0.0274991	0.185534	-0.240532	-0.253004	0.800265	0.937703	C4
MAGED1	-0.0527879	0.0906122	-0.582569	0.560187	All	-0.230385	0.124809	0.839795	0.664602	0.136341	-0.0794278	0.1878	-0.346656	-0.582569	0.560184	0.839789	C4
LY9	0.0808173	0.0554594	1.45723	0.14506	All	-0.0278812	0.189516	0.533612	0.664602	0.0834476	0.121603	0.28516	-0.0419547	1.45723	0.145052	0.533582	C4
LY96	-0.0561688	0.0687278	-0.817264	0.413782	All	-0.190873	0.0785352	0.769783	0.664602	0.103412	-0.084515	0.118173	-0.287203	-0.817264	0.413777	0.769773	C4
LYAR	0.0088195	0.10165	0.0867631	0.93086	All	-0.190412	0.208051	0.97797	0.664602	0.152949	0.0132704	0.313051	-0.28651	0.0867631	0.93086	0.97797	C4
LYN	-0.0658596	0.161176	-0.408619	0.682821	All	-0.381758	0.250039	0.888996	0.664602	0.242515	-0.0990963	0.376233	-0.574425	-0.408619	0.682819	0.888993	C4
LYPD1	0.266557	0.120735	2.20778	0.0272656	All	0.02992	0.503193	0.275041	0.664602	0.181665	0.401077	0.757141	0.0450129	2.20778	0.0272597	0.274981	C4
LYPD3	-0.0889004	0.0644447	-1.37948	0.167754	All	-0.21521	0.0374089	0.56576	0.664602	0.0969674	-0.133765	0.0562912	-0.323821	-1.37948	0.167746	0.565701	C4
LYPD8	0.156136	0.092315	1.69135	0.090779	All	-0.0247975	0.33707	0.458656	0.664602	0.138903	0.234932	0.507182	-0.0373168	1.69135	0.0907708	0.458615	C4
MAD1L1	-0.00164222	0.0966849	-0.0169853	0.986448	All	-0.191141	0.187857	0.995534	0.664602	0.145478	-0.00247098	0.282666	-0.287608	-0.0169853	0.986448	0.995534	C4
MAEA	-0.0348353	0.0736382	-0.47306	0.636173	All	-0.179163	0.109493	0.870328	0.664602	0.1108	-0.0524153	0.164754	-0.269584	-0.47306	0.63617	0.870319	C4
LRRN1	-0.153576	0.0747027	-2.05583	0.0398059	All	-0.299991	-0.00716129	0.327661	0.664602	0.112402	-0.23108	-0.0107713	-0.451388	-2.05583	0.0397991	0.327586	C4
LRRC25	-0.00129131	0.0758053	-0.0170346	0.986409	All	-0.149867	0.147284	0.995534	0.664602	0.114061	-0.00194298	0.221617	-0.225503	-0.0170346	0.986409	0.995534	C4
LILRB1	-0.0526996	0.0536575	-0.982148	0.326033	All	-0.157866	0.0524672	0.713307	0.664602	0.0807364	-0.079295	0.0789482	-0.237538	-0.982148	0.326027	0.713293	C4
LGALS7_LGALS7B	0.0595981	0.079887	0.74603	0.455654	All	-0.0969775	0.216174	0.790943	0.664602	0.120203	0.0896749	0.325272	-0.145922	0.74603	0.455649	0.790935	C4
LGALS8	0.0799679	0.117209	0.682265	0.495075	All	-0.149758	0.309694	0.807745	0.664602	0.17636	0.120325	0.465991	-0.225342	0.682265	0.495071	0.807737	C4
LGALS9	0.000244094	0.0648289	0.00376521	0.996996	All	-0.126818	0.127306	0.998735	0.664602	0.0975454	0.000367279	0.191556	-0.190822	0.00376521	0.996996	0.998735	C4
LGMN	-0.079728	0.0703248	-1.13371	0.256923	All	-0.217562	0.0581061	0.660472	0.664602	0.105815	-0.119964	0.0874337	-0.327361	-1.13371	0.256916	0.660447	C4
LHB	-0.056894	0.164544	-0.345767	0.72952	All	-0.379395	0.265607	0.909928	0.664602	0.247584	-0.0856062	0.399658	-0.57087	-0.345767	0.729518	0.909925	C4
LHPP	-0.0894439	0.113131	-0.790622	0.429169	All	-0.311177	0.132289	0.778256	0.664602	0.170224	-0.134583	0.199056	-0.468221	-0.790622	0.429164	0.778236	C4
LIF	0.206675	0.097533	2.11903	0.0340945	All	0.0155141	0.397836	0.307166	0.664602	0.146754	0.310976	0.598614	0.0233381	2.11903	0.034088	0.307108	C4
LIFR	-0.0603804	0.0459971	-1.3127	0.189292	All	-0.150533	0.0297723	0.59086	0.664602	0.06921	-0.0908519	0.0447997	-0.226504	-1.3127	0.189284	0.590836	C4
LILRA2	0.0280155	0.068299	0.410189	0.68167	All	-0.105848	0.161879	0.888996	0.664602	0.102767	0.0421538	0.243577	-0.159269	0.410189	0.681667	0.888993	C4
LILRA5	0.0467808	0.0642772	0.727797	0.466742	All	-0.0792003	0.172762	0.795993	0.664602	0.0967154	0.0703892	0.259951	-0.119173	0.727797	0.466738	0.795978	C4
LRPAP1	-0.117298	0.109663	-1.06962	0.284798	All	-0.332234	0.0976385	0.685647	0.664602	0.165006	-0.176494	0.146919	-0.499906	-1.06962	0.284792	0.685631	C4
LILRB2	-0.0116158	0.0671917	-0.172876	0.86275	All	-0.143309	0.120077	0.960691	0.664602	0.101101	-0.0174779	0.180679	-0.215635	-0.172876	0.862749	0.960689	C4
LILRB4	-0.0235457	0.0846396	-0.278188	0.78087	All	-0.189436	0.142345	0.929557	0.664602	0.127354	-0.0354283	0.214185	-0.285042	-0.278188	0.780868	0.929553	C4
LILRB5	0.0784493	0.137185	0.571851	0.567427	All	-0.190428	0.347327	0.843633	0.664602	0.206417	0.11804	0.522617	-0.286537	0.571851	0.567423	0.843628	C4
LPCAT2	0.0680098	0.0810287	0.839329	0.40129	All	-0.0908036	0.226823	0.762094	0.664602	0.121921	0.102332	0.341296	-0.136633	0.839329	0.401285	0.762073	C4
LPL	0.374486	0.0909716	4.11652	3.85451e-05	All	0.196185	0.552787	0.00392527	0.664602	0.136881	0.563474	0.831762	0.295187	4.11652	3.84643e-05	0.0039075	C4
LPO	-0.0155931	0.110417	-0.14122	0.887697	All	-0.232007	0.200821	0.964568	0.664602	0.166141	-0.0234624	0.302173	-0.349098	-0.14122	0.887696	0.964567	C4
LRIG1	0.1373	0.0668037	2.05527	0.0398595	All	0.00636695	0.268233	0.327768	0.664602	0.100517	0.20659	0.403603	0.00957648	2.05527	0.0398527	0.327648	C4
LRP1	-0.0109667	0.0508794	-0.215543	0.829345	All	-0.110688	0.088755	0.949835	0.664602	0.0765562	-0.0165012	0.133549	-0.166551	-0.215543	0.829344	0.949834	C4
LRP11	0.0924624	0.0689388	1.34122	0.179856	All	-0.0426552	0.22758	0.578575	0.664602	0.10373	0.139124	0.342434	-0.0641854	1.34122	0.179848	0.578549	C4
LGALS4	-0.419196	0.105429	-3.97609	7.0186e-05	All	-0.625833	-0.212558	0.00631628	0.664602	0.158635	-0.630747	-0.319822	-0.941671	-3.97609	7.00572e-05	0.00629462	C4
SPINK5	0.0365694	0.0642395	0.569267	0.569179	All	-0.0893376	0.162476	0.844169	0.664602	0.0966586	0.0550245	0.244475	-0.134426	0.569267	0.569175	0.844159	C4
PDLIM7	-0.0408538	0.240862	-0.169615	0.865314	All	-0.512934	0.431227	0.961741	0.664602	0.362415	-0.0614711	0.648863	-0.771805	-0.169615	0.865313	0.961739	C4
PCSK9	-0.0230009	0.0776363	-0.296265	0.76703	All	-0.175165	0.129163	0.924231	0.664602	0.116816	-0.0346085	0.194351	-0.263568	-0.296265	0.767028	0.924229	C4
PDCD1	0.201248	0.0815334	2.46829	0.0135805	All	0.0414453	0.36105	0.199074	0.664602	0.12268	0.30281	0.543263	0.0623567	2.46829	0.0135761	0.199011	C4
PDCD1LG2	0.0238509	0.0597418	0.399233	0.689724	All	-0.093241	0.140943	0.890733	0.664602	0.0898912	0.0358875	0.212074	-0.140299	0.399233	0.689722	0.890726	C4
PDCD5	-0.0965716	0.113395	-0.851639	0.39442	All	-0.318822	0.125679	0.757556	0.664602	0.170621	-0.145307	0.18911	-0.479725	-0.851639	0.394415	0.757546	C4
PDCD6	0.198868	0.135612	1.46645	0.142535	All	-0.0669267	0.464662	0.531783	0.664602	0.20405	0.299229	0.699166	-0.100709	1.46645	0.142526	0.531747	C4
PDGFA	0.0513731	0.139969	0.367031	0.713598	All	-0.222962	0.325708	0.903176	0.664602	0.210606	0.0772991	0.490087	-0.335489	0.367031	0.713596	0.903173	C4
PDGFB	-0.00991861	0.165636	-0.059882	0.95225	All	-0.334559	0.314722	0.984598	0.664602	0.249226	-0.0149241	0.473558	-0.503407	-0.059882	0.95225	0.984598	C4
PDGFC	-0.0752661	0.0539431	-1.39529	0.162938	All	-0.180993	0.0304605	0.559684	0.664602	0.0811661	-0.11325	0.0458357	-0.272335	-1.39529	0.16293	0.559656	C4
PDGFRA	0.0244767	0.0542532	0.451156	0.651879	All	-0.0818576	0.130811	0.877067	0.664602	0.0816326	0.0368291	0.196829	-0.123171	0.451156	0.651877	0.877064	C4
PDGFRB	0.00743393	0.0670838	0.110816	0.911763	All	-0.124048	0.138916	0.972427	0.664602	0.100938	0.0111855	0.209025	-0.186654	0.110816	0.911763	0.972426	C4
PI3	0.0401167	0.103536	0.387466	0.698414	All	-0.162811	0.243044	0.893772	0.664602	0.155787	0.0603621	0.365705	-0.24498	0.387466	0.698412	0.89377	C4
PDP1	0.257342	0.0955274	2.6939	0.00706519	All	0.0701112	0.444572	0.141075	0.664602	0.143736	0.387212	0.668935	0.105488	2.6939	0.0070621	0.141006	C4
PEAR1	0.0458463	0.0434842	1.05432	0.291742	All	-0.0393811	0.131074	0.691607	0.664602	0.0654289	0.0689831	0.197224	-0.0592575	1.05432	0.291736	0.691591	C4
PEBP1	-0.164073	0.111607	-1.4701	0.141544	All	-0.382819	0.0546728	0.530815	0.664602	0.167931	-0.246875	0.08227	-0.576019	-1.4701	0.141536	0.530748	C4
PECAM1	-0.0241291	0.0580223	-0.415858	0.677516	All	-0.137851	0.0895926	0.888286	0.664602	0.0873039	-0.036306	0.13481	-0.207422	-0.415858	0.677514	0.888283	C4
PFDN2	-0.0201631	0.104502	-0.192945	0.847003	All	-0.224982	0.184656	0.956561	0.664602	0.157239	-0.0303386	0.277851	-0.338528	-0.192945	0.847002	0.95656	C4
PFKFB2	-0.249687	0.144685	-1.72573	0.0844043	All	-0.533265	0.0338904	0.445915	0.664602	0.217702	-0.375695	0.0510014	-0.802391	-1.72573	0.0843963	0.445872	C4
PGF	-0.0683664	0.0497025	-1.37551	0.168981	All	-0.165782	0.0290488	0.566691	0.664602	0.0747854	-0.102868	0.0437113	-0.249448	-1.37551	0.168973	0.566648	C4
PGLYRP1	-0.0209105	0.0827313	-0.252752	0.800462	All	-0.183061	0.14124	0.937705	0.664602	0.124482	-0.0314631	0.212522	-0.275449	-0.252752	0.80046	0.937703	C4
PHOSPHO1	0.0365142	0.0575684	0.634275	0.525905	All	-0.0763178	0.149346	0.824685	0.664602	0.0866209	0.0549415	0.224718	-0.114835	0.634275	0.525901	0.824672	C4
PCDH17	0.000417101	0.0693464	0.00601475	0.995201	All	-0.135499	0.136333	0.998735	0.664602	0.104343	0.000627595	0.205139	-0.203884	0.00601475	0.995201	0.998735	C4
PCDH1	0.0346989	0.0402487	0.862113	0.388631	All	-0.0441871	0.113585	0.755217	0.664602	0.0605606	0.0522101	0.170909	-0.0664887	0.862113	0.388626	0.755205	C4
PADI2	-0.0544437	0.109888	-0.495449	0.620286	All	-0.269819	0.160932	0.863129	0.664602	0.165343	-0.0819193	0.242154	-0.405992	-0.495449	0.620283	0.86312	C4
OGN	0.182322	0.0808217	2.25585	0.0240856	All	0.0239141	0.340729	0.262932	0.664602	0.121609	0.274332	0.512686	0.0359782	2.25585	0.02408	0.262871	C4
OLR1	-0.13267	0.114199	-1.16174	0.24535	All	-0.356496	0.0911571	0.650753	0.664602	0.171831	-0.199623	0.137167	-0.536412	-1.16174	0.245343	0.650733	C4
OMD	0.162164	0.0844078	1.9212	0.0547137	All	-0.0032718	0.327601	0.377582	0.664602	0.127005	0.244002	0.492932	-0.00492753	1.9212	0.0547062	0.377486	C4
OMG	0.0881625	0.125483	0.702588	0.482317	All	-0.157779	0.334104	0.802123	0.664602	0.188809	0.132655	0.50272	-0.23741	0.702588	0.482313	0.802116	C4
OPTC	-0.0308343	0.0883612	-0.348957	0.727124	All	-0.204019	0.142351	0.909008	0.664602	0.132954	-0.0463951	0.214194	-0.306984	-0.348957	0.727122	0.909006	C4
OSCAR	0.043275	0.0651786	0.663945	0.50673	All	-0.0844728	0.171023	0.815977	0.664602	0.0980717	0.0651142	0.257335	-0.127106	0.663945	0.506726	0.815971	C4
OSM	-0.285171	0.139544	-2.04359	0.0410009	All	-0.558672	-0.0116696	0.330983	0.664602	0.209966	-0.429085	-0.0175512	-0.840619	-2.04359	0.040994	0.330896	C4
OSMR	0.0222916	0.0386984	0.576034	0.564596	All	-0.0535559	0.0981391	0.842568	0.664602	0.0582279	0.0335413	0.147668	-0.0805855	0.576034	0.564592	0.842563	C4
OXT	-0.900691	0.288408	-3.12298	0.00179167	All	-1.46596	-0.335422	0.0604713	0.664602	0.433956	-1.35523	-0.50468	-2.20579	-3.12298	0.00179033	0.0603867	C4
P4HB	-0.125637	0.0748526	-1.67846	0.0932655	All	-0.272345	0.0210713	0.46321	0.664602	0.112628	-0.189041	0.0317092	-0.409791	-1.67846	0.0932573	0.463169	C4
PBLD	-0.243752	0.0965856	-2.52368	0.0116172	All	-0.433056	-0.0544473	0.182916	0.664602	0.145329	-0.366764	-0.0819195	-0.651608	-2.52368	0.0116132	0.182779	C4
PADI4	-0.1922	0.139445	-1.37832	0.168113	All	-0.465507	0.0811079	0.56593	0.664602	0.209818	-0.289195	0.122047	-0.700438	-1.37832	0.168105	0.565903	C4
PAEP	-0.421124	0.220452	-1.91028	0.0561048	All	-0.853201	0.0109531	0.380508	0.664602	0.331705	-0.633649	0.0164927	-1.28379	-1.91028	0.0560973	0.380398	C4
PAG1	-0.0102964	0.108201	-0.0951592	0.924189	All	-0.222367	0.201774	0.975947	0.664602	0.162806	-0.0154925	0.303608	-0.334593	-0.0951592	0.924188	0.975946	C4
PAK4	0.02418	0.115014	0.210235	0.833486	All	-0.201244	0.249604	0.951559	0.664602	0.173057	0.0363827	0.375575	-0.30281	0.210235	0.833484	0.951558	C4
PAM	0.112603	0.0549075	2.05078	0.0402952	All	0.00498648	0.22022	0.32889	0.664602	0.0826172	0.16943	0.331359	0.00749999	2.05078	0.0402884	0.328834	C4
PAMR1	-0.183309	0.0554213	-3.30756	0.000941985	All	-0.291933	-0.0746856	0.0373486	0.664602	0.0833902	-0.275818	-0.112374	-0.439263	-3.30756	0.000941116	0.0372742	C4
PAPPA	0.0197067	0.0880438	0.223828	0.822892	All	-0.152856	0.192269	0.946626	0.664602	0.132476	0.0296519	0.289305	-0.230001	0.223828	0.822891	0.946624	C4
PARK7	-0.116235	0.100514	-1.15641	0.247521	All	-0.313238	0.080768	0.653631	0.664602	0.151239	-0.174894	0.121534	-0.471322	-1.15641	0.247513	0.65359	C4
PARP1	0.0754092	0.11055	0.682126	0.495164	All	-0.141265	0.292084	0.807745	0.664602	0.166341	0.113465	0.439493	-0.212562	0.682126	0.49516	0.807737	C4
OGFR	0.0186491	0.0626881	0.29749	0.766094	All	-0.104217	0.141515	0.923836	0.664602	0.0943243	0.0280605	0.212936	-0.156815	0.29749	0.766092	0.923835	C4
PIGR	-0.244139	0.0733572	-3.32809	0.000875276	All	-0.387917	-0.100362	0.0356868	0.664602	0.110378	-0.367347	-0.151006	-0.583687	-3.32809	0.000874449	0.0356531	C4
PPME1	-0.143705	0.114115	-1.2593	0.207929	All	-0.367365	0.0799557	0.611646	0.664602	0.171704	-0.216227	0.120312	-0.552766	-1.2593	0.207921	0.611624	C4
PNLIPRP2	-0.764721	0.564536	-1.3546	0.175553	All	-1.87119	0.341749	0.572527	0.664602	0.849435	-1.15065	0.514247	-2.81554	-1.3546	0.175545	0.572471	C4
PNPT1	-0.349875	0.226654	-1.54365	0.122681	All	-0.794108	0.0943592	0.510021	0.664602	0.341037	-0.526442	0.141991	-1.19488	-1.54365	0.122673	0.509957	C4
PODXL	-0.0132235	0.029071	-0.454867	0.649207	All	-0.0702016	0.0437547	0.875935	0.664602	0.043742	-0.0198968	0.0658376	-0.105631	-0.454867	0.649205	0.875932	C4
PODXL2	0.132927	0.054218	2.45171	0.0142224	All	0.0266614	0.239192	0.204383	0.664602	0.0815796	0.20001	0.359906	0.0401135	2.45171	0.0142179	0.204319	C4
POLR2F	0.010837	0.0678387	0.159746	0.873082	All	-0.122124	0.143798	0.963616	0.664602	0.102074	0.016306	0.216372	-0.18376	0.159746	0.873081	0.963614	C4
PON2	-0.156786	0.0667281	-2.34963	0.0187973	All	-0.287571	-0.0260015	0.23208	0.664602	0.100403	-0.23591	-0.0391198	-0.4327	-2.34963	0.0187922	0.232018	C4
PON3	0.172356	0.0572924	3.00836	0.00262834	All	0.060065	0.284647	0.0750489	0.664602	0.0862056	0.259337	0.4283	0.0903744	3.00836	0.00262663	0.075	C4
PPCDC	-0.0688898	0.0901645	-0.764045	0.444845	All	-0.245609	0.107829	0.78704	0.664602	0.135667	-0.103656	0.162252	-0.369563	-0.764045	0.44484	0.78703	C4
PPIB	-0.0600682	0.182589	-0.32898	0.742173	All	-0.417936	0.2978	0.913328	0.664602	0.274735	-0.0903822	0.448098	-0.628862	-0.32898	0.742171	0.913325	C4
PPM1A	0.079678	0.0592179	1.34551	0.17847	All	-0.0363869	0.195743	0.576992	0.664602	0.0891028	0.119888	0.29453	-0.0547531	1.34551	0.178462	0.576926	C4
PRDX5	-0.0150772	0.130099	-0.11589	0.90774	All	-0.270067	0.239912	0.970795	0.664602	0.195755	-0.0226861	0.360994	-0.406366	-0.11589	0.907739	0.970794	C4
PPP1R12A	-0.134362	0.183298	-0.733024	0.463548	All	-0.493618	0.224895	0.794732	0.664602	0.275801	-0.202168	0.338401	-0.742738	-0.733024	0.463544	0.794724	C4
PPP1R2	-0.00608359	0.153151	-0.0397229	0.968314	All	-0.306254	0.294086	0.991617	0.664602	0.23044	-0.00915374	0.442508	-0.460816	-0.0397229	0.968314	0.991617	C4
PPP1R9B	0.0398155	0.182061	0.218693	0.82689	All	-0.317017	0.396648	0.948129	0.664602	0.27394	0.0599088	0.596831	-0.477013	0.218693	0.826889	0.948127	C4
PPP3R1	-0.0147096	0.0789978	-0.186203	0.852286	All	-0.169542	0.140123	0.958763	0.664602	0.118865	-0.022133	0.210842	-0.255108	-0.186203	0.852285	0.958762	C4
PPY	-0.0853374	0.196496	-0.434295	0.664077	All	-0.470463	0.299788	0.882148	0.664602	0.29566	-0.128404	0.45109	-0.707898	-0.434295	0.664074	0.882145	C4
PQBP1	-0.0830565	0.108111	-0.768253	0.442341	All	-0.29495	0.128837	0.785409	0.664602	0.16267	-0.124972	0.193862	-0.443805	-0.768253	0.442337	0.785401	C4
PRCP	-0.159371	0.0627596	-2.53939	0.0111086	All	-0.282378	-0.0363645	0.179333	0.664602	0.0944319	-0.239799	-0.0547128	-0.424886	-2.53939	0.0111046	0.179269	C4
PRDX1	0.0741107	0.16558	0.447581	0.654458	All	-0.250421	0.398642	0.877067	0.664602	0.249142	0.111511	0.59983	-0.376807	0.447581	0.654455	0.877064	C4
PRDX3	0.0210126	0.13579	0.154744	0.877024	All	-0.24513	0.287155	0.964386	0.664602	0.204317	0.0316168	0.432079	-0.368845	0.154744	0.877023	0.964384	C4
PMVK	0.00568069	0.203764	0.0278787	0.977759	All	-0.39369	0.405051	0.993642	0.664602	0.306596	0.00854751	0.609475	-0.59238	0.0278787	0.977759	0.993642	C4
PM20D1	0.709626	0.351579	2.0184	0.0435567	All	0.0205444	1.39871	0.341093	0.664602	0.529007	1.06775	2.1046	0.0308933	2.0184	0.0435498	0.341038	C4
PLAT	-0.160536	0.104139	-1.54155	0.123191	All	-0.364646	0.0435733	0.510021	0.664602	0.156695	-0.241553	0.0655687	-0.548674	-1.54155	0.123183	0.509957	C4
PIK3IP1	0.158638	0.051856	3.05921	0.00222078	All	0.0570023	0.260274	0.0683064	0.664602	0.0780256	0.238697	0.391627	0.0857663	3.05921	0.00221924	0.0682591	C4
PILRA	0.0284727	0.0815543	0.349126	0.726997	All	-0.131371	0.188316	0.909008	0.664602	0.122712	0.0428418	0.283356	-0.197673	0.349126	0.726995	0.909006	C4
PILRB	0.0330579	0.111048	0.29769	0.765941	All	-0.184592	0.250708	0.923836	0.664602	0.16709	0.0497409	0.377237	-0.277755	0.29769	0.76594	0.923835	C4
PKLR	0.316757	0.123783	2.55897	0.010502	All	0.0741469	0.559366	0.174028	0.664602	0.186251	0.476611	0.841663	0.111559	2.55897	0.0104982	0.173965	C4
PLA2G10	0.0980928	0.115099	0.852246	0.394083	All	-0.127497	0.323683	0.757406	0.664602	0.173185	0.147596	0.487039	-0.191847	0.852246	0.394077	0.757396	C4
PLA2G15	-0.126334	0.0523669	-2.41247	0.0158494	All	-0.228971	-0.0236965	0.213969	0.664602	0.0787944	-0.190089	-0.0356523	-0.344526	-2.41247	0.0158447	0.213905	C4
PLA2G1B	-0.0127333	0.0841217	-0.151368	0.879687	All	-0.177609	0.152142	0.964386	0.664602	0.126575	-0.0191593	0.228927	-0.267245	-0.151368	0.879686	0.964384	C4
PLA2G2A	-0.101493	0.107561	-0.943584	0.345388	All	-0.31231	0.109323	0.726242	0.664602	0.161843	-0.152713	0.1645	-0.469926	-0.943584	0.345382	0.72621	C4
PLA2G4A	0.0584514	0.167778	0.348386	0.727552	All	-0.270387	0.38729	0.909155	0.664602	0.252449	0.0879495	0.582749	-0.40685	0.348386	0.72755	0.909153	C4
PLA2G7	0.0258623	0.0597606	0.432765	0.665188	All	-0.0912664	0.142991	0.882468	0.664602	0.0899194	0.038914	0.215156	-0.137328	0.432765	0.665186	0.882462	C4
PLXNB3	-0.0328386	0.0902204	-0.363982	0.715873	All	-0.209667	0.14399	0.904619	0.664602	0.135751	-0.049411	0.216661	-0.315483	-0.363982	0.715871	0.904617	C4
PLAU	-0.0358657	0.0555121	-0.646088	0.518226	All	-0.144667	0.0729361	0.820895	0.664602	0.0835269	-0.0539657	0.109747	-0.217678	-0.646088	0.518223	0.820888	C4
PLAUR	-0.0172978	0.0555766	-0.311242	0.755619	All	-0.126226	0.0916305	0.919412	0.664602	0.083624	-0.0260273	0.137876	-0.18993	-0.311242	0.755617	0.91941	C4
PLIN1	-0.0050064	0.069486	-0.0720491	0.942563	All	-0.141196	0.131184	0.982409	0.664602	0.104553	-0.00753293	0.19739	-0.212456	-0.0720491	0.942563	0.982408	C4
PLIN3	0.0705367	0.0826994	0.852929	0.393704	All	-0.0915511	0.232624	0.757053	0.664602	0.124434	0.106134	0.350025	-0.137758	0.852929	0.393699	0.757041	C4
PLPBP	-0.037005	0.128909	-0.287064	0.774065	All	-0.289661	0.215651	0.928186	0.664602	0.193964	-0.0556799	0.324489	-0.435849	-0.287064	0.774063	0.928182	C4
PLTP	0.0769779	0.0717159	1.07337	0.283111	All	-0.0635826	0.217538	0.684809	0.664602	0.107908	0.115826	0.327325	-0.0956742	1.07337	0.283104	0.684792	C4
PLXDC1	0.0225807	0.0636919	0.35453	0.722944	All	-0.102253	0.147415	0.906757	0.664602	0.0958347	0.0339763	0.221812	-0.15386	0.35453	0.722942	0.906755	C4
PLXNA4	-0.0781569	0.156048	-0.500853	0.616478	All	-0.384005	0.227691	0.862449	0.664602	0.234799	-0.1176	0.342606	-0.577805	-0.500853	0.616475	0.862439	C4
PLXNB2	0.0278484	0.0461647	0.60324	0.546353	All	-0.0626328	0.11833	0.834378	0.664602	0.0694622	0.0419024	0.178048	-0.0942436	0.60324	0.546349	0.834372	C4
PIK3AP1	0.0289628	0.116438	0.24874	0.803563	All	-0.199252	0.257177	0.93933	0.664602	0.1752	0.0435791	0.386971	-0.299812	0.24874	0.803562	0.939329	C4
SIT1	-0.174696	0.107215	-1.62939	0.103238	All	-0.384834	0.0354424	0.482528	0.664602	0.161323	-0.262858	0.0533346	-0.57905	-1.62939	0.10323	0.48249	C4
SLC39A5	-0.0297623	0.103881	-0.286504	0.774494	All	-0.233365	0.173841	0.928186	0.664602	0.156306	-0.0447821	0.261577	-0.351141	-0.286504	0.774492	0.928182	C4
SLC39A14	0.220759	0.0626016	3.52641	0.000421726	All	0.0980621	0.343456	0.0218749	0.664602	0.0941941	0.332167	0.516788	0.147547	3.52641	0.000421232	0.0218492	C4
SLC27A4	-0.0118406	0.125489	-0.0943564	0.924827	All	-0.257794	0.234113	0.975947	0.664602	0.188818	-0.0178162	0.352267	-0.387899	-0.0943564	0.924826	0.975946	C4
SLC16A1	-0.147666	0.108972	-1.35507	0.175402	All	-0.361247	0.0659164	0.572527	0.664602	0.163966	-0.222186	0.0991878	-0.543561	-1.35507	0.175394	0.572471	C4
SLAMF8	-0.148864	0.101864	-1.4614	0.143915	All	-0.348515	0.0507863	0.533481	0.664602	0.153271	-0.22399	0.0764216	-0.524402	-1.4614	0.143907	0.533424	C4
SLAMF7	-0.0321007	0.112568	-0.285168	0.775517	All	-0.25273	0.188528	0.92846	0.664602	0.169376	-0.0483007	0.283677	-0.380279	-0.285168	0.775516	0.928458	C4
SLAMF6	0.0905005	0.0708886	1.27666	0.201731	All	-0.0484386	0.22944	0.606658	0.664602	0.106663	0.136173	0.345233	-0.0728876	1.27666	0.201723	0.606607	C4
SLAMF1	-0.102819	0.111731	-0.920242	0.357452	All	-0.321808	0.116169	0.734573	0.664602	0.168117	-0.154708	0.174801	-0.484218	-0.920242	0.357447	0.73456	C4
SKAP2	0.0575478	0.20045	0.287093	0.774042	All	-0.335327	0.450423	0.928186	0.664602	0.301609	0.0865899	0.677744	-0.504564	0.287093	0.774041	0.928182	C4
SKAP1	-0.010715	0.141636	-0.0756521	0.939696	All	-0.288316	0.266886	0.981692	0.664602	0.213114	-0.0161225	0.40158	-0.433825	-0.0756521	0.939696	0.981692	C4
NECTIN2	0.0609075	0.0566167	1.07579	0.282029	All	-0.0500592	0.171874	0.683424	0.664602	0.0851889	0.0916451	0.258615	-0.0753251	1.07579	0.282022	0.683389	C4
NCAM2	0.0362504	0.0535768	0.676606	0.49866	All	-0.0687583	0.141259	0.809791	0.664602	0.080615	0.0545446	0.21255	-0.103461	0.676606	0.498656	0.809785	C4
NCAN	0.371675	0.0766112	4.85144	1.23053e-06	All	0.221519	0.52183	0.000269671	0.664602	0.115274	0.559244	0.785181	0.333307	4.85144	1.2257e-06	0.000268613	C4
NCF2	-0.0259133	0.159703	-0.162259	0.871102	All	-0.338925	0.287098	0.963008	0.664602	0.240298	-0.0389906	0.431994	-0.509975	-0.162259	0.871102	0.963006	C4
NCK2	-0.136355	0.202263	-0.674148	0.500221	All	-0.532782	0.260073	0.810897	0.664602	0.304337	-0.205168	0.391332	-0.801667	-0.674148	0.500217	0.810885	C4
NCLN	0.243382	0.100486	2.42204	0.0154381	All	0.0464327	0.440331	0.211554	0.664602	0.151197	0.366207	0.662554	0.06986	2.42204	0.0154334	0.211436	C4
NCR1	0.203341	0.0706241	2.8792	0.00398908	All	0.0649201	0.341762	0.0993417	0.664602	0.106265	0.305959	0.514239	0.097679	2.8792	0.00398687	0.0992866	C4
NCS1	-0.0561764	0.0545134	-1.03051	0.302779	All	-0.163021	0.0506679	0.696995	0.664602	0.0820242	-0.0845264	0.0762409	-0.245294	-1.03051	0.302772	0.69698	C4
NDRG1	-0.125079	0.128322	-0.974734	0.329699	All	-0.376585	0.126426	0.715205	0.664602	0.19308	-0.188202	0.190236	-0.56664	-0.974734	0.329692	0.71519	C4
NDUFS6	-0.162789	0.14876	-1.09431	0.273826	All	-0.454353	0.128775	0.67553	0.664602	0.223833	-0.244943	0.19377	-0.683656	-1.09431	0.273819	0.675487	C4
SLIT2	-0.144178	0.0981066	-1.4696	0.141678	All	-0.336463	0.0481077	0.530815	0.664602	0.147617	-0.216939	0.072391	-0.506268	-1.4696	0.141669	0.530748	C4
SLITRK2	0.0943586	0.0780795	1.20849	0.226864	All	-0.0586743	0.247392	0.630609	0.664602	0.117483	0.141978	0.372245	-0.0882891	1.20849	0.226857	0.630556	C4
SNCG	-0.168791	0.134387	-1.25601	0.209119	All	-0.432185	0.0946019	0.612223	0.664602	0.202206	-0.253974	0.142351	-0.650298	-1.25601	0.209112	0.61218	C4
SPINK1	-0.130119	0.0806122	-1.61413	0.106507	All	-0.288116	0.0278782	0.485367	0.664602	0.121294	-0.195785	0.0419515	-0.433521	-1.61413	0.106498	0.485285	C4
SPARCL1	0.0948533	0.0526777	1.80063	0.0717687	All	-0.00839322	0.1981	0.418234	0.664602	0.0792621	0.142722	0.298076	-0.0126318	1.80063	0.0717608	0.418148	C4
SPARC	-0.0699493	0.136058	-0.514113	0.607176	All	-0.336618	0.19672	0.859339	0.664602	0.204721	-0.10525	0.296004	-0.506504	-0.514113	0.607173	0.859331	C4
SOST	0.0807059	0.0752817	1.07205	0.283703	All	-0.0668435	0.228255	0.684966	0.664602	0.113273	0.121435	0.343451	-0.100581	1.07205	0.283697	0.684935	C4
SORT1	-0.0445484	0.0716829	-0.621464	0.534298	All	-0.185044	0.0959475	0.829012	0.664602	0.107858	-0.0670302	0.144372	-0.278433	-0.621464	0.534294	0.829006	C4
SORD	-0.459294	0.13275	-3.45984	0.000541082	All	-0.719479	-0.199109	0.0263507	0.664602	0.199744	-0.691081	-0.299584	-1.08258	-3.45984	0.000540493	0.026322	C4
SORCS2	0.018891	0.0658597	0.286837	0.774239	All	-0.110192	0.147974	0.928186	0.664602	0.0990965	0.0284245	0.222654	-0.165805	0.286837	0.774237	0.928182	C4
SOD2	-0.168647	0.0720724	-2.33997	0.0192903	All	-0.309907	-0.0273881	0.236833	0.664602	0.108444	-0.253757	-0.0412059	-0.466308	-2.33997	0.0192851	0.23677	C4
SOD1	-0.052553	0.0912632	-0.57584	0.564727	All	-0.231426	0.12632	0.84262	0.664602	0.13732	-0.0790745	0.190073	-0.348222	-0.57584	0.564723	0.842615	C4
SNX9	0.0747408	0.130155	0.574246	0.565805	All	-0.180358	0.329839	0.843368	0.664602	0.195839	0.112459	0.496303	-0.271384	0.574246	0.565801	0.843363	C4
SLITRK6	0.16116	0.065119	2.47486	0.0133332	All	0.0335294	0.288791	0.198755	0.664602	0.0979821	0.242492	0.434536	0.0504468	2.47486	0.0133289	0.198616	C4
SNAP29	-0.273293	0.174687	-1.56447	0.117716	All	-0.615674	0.069088	0.503118	0.664602	0.262845	-0.411213	0.103963	-0.92639	-1.56447	0.117707	0.503083	C4
SNAP23	-0.0364909	0.166325	-0.219395	0.826343	All	-0.362482	0.2895	0.948081	0.664602	0.250263	-0.0549064	0.435608	-0.545421	-0.219395	0.826342	0.948078	C4
SMPDL3A	-0.279413	0.125991	-2.21771	0.0265801	All	-0.526352	-0.0324744	0.273222	0.664602	0.189574	-0.420422	-0.0488561	-0.791988	-2.21771	0.0265743	0.273162	C4
SMPD1	-0.232747	0.0952864	-2.44261	0.0145861	All	-0.419505	-0.0459893	0.207231	0.664602	0.143374	-0.350206	-0.0691932	-0.631218	-2.44261	0.0145816	0.207167	C4
SMOC2	-0.255747	0.0749402	-3.41268	0.00064393	All	-0.402627	-0.108867	0.0292965	0.664602	0.112759	-0.384813	-0.163804	-0.605821	-3.41268	0.000643264	0.0292307	C4
SMOC1	-0.178271	0.0648884	-2.74735	0.00601067	All	-0.30545	-0.0510923	0.127813	0.664602	0.0976349	-0.268238	-0.0768731	-0.459602	-2.74735	0.00600786	0.127722	C4
SMARCA2	-0.0745204	0.135878	-0.548436	0.583396	All	-0.340837	0.191796	0.848398	0.664602	0.20445	-0.112128	0.288595	-0.512851	-0.548436	0.583393	0.848393	C4
SMAD5	-0.0614265	0.0393527	-1.56092	0.118551	All	-0.138556	0.0157034	0.503712	0.664602	0.0592125	-0.0924261	0.0236305	-0.208483	-1.56092	0.118542	0.503676	C4
SMAD1	-0.189884	0.154692	-1.2275	0.219644	All	-0.493075	0.113307	0.624068	0.664602	0.232759	-0.285711	0.170497	-0.741919	-1.2275	0.219636	0.624046	C4
SPINK4	0.0483178	0.123072	0.392599	0.694618	All	-0.192898	0.289534	0.891902	0.664602	0.185181	0.0727019	0.435657	-0.290253	0.392599	0.694615	0.891897	C4
NECTIN4	0.127278	0.0601051	2.1176	0.0342156	All	0.00947457	0.245082	0.307621	0.664602	0.0904378	0.191511	0.368769	0.0142528	2.1176	0.0342092	0.307553	C4
NTproBNP	-0.0733229	0.197465	-0.371322	0.7104	All	-0.460347	0.313701	0.900429	0.664602	0.297117	-0.110326	0.472024	-0.692676	-0.371322	0.710398	0.900426	C4
NPY	-0.26404	0.125857	-2.09794	0.0359173	All	-0.510715	-0.0173648	0.311425	0.664602	0.189372	-0.397291	-0.0261213	-0.76846	-2.09794	0.0359108	0.311369	C4
NRCAM	-0.0645904	0.0544055	-1.1872	0.235155	All	-0.171223	0.0420425	0.639877	0.664602	0.0818619	-0.0971867	0.0632626	-0.257636	-1.1872	0.235147	0.639854	C4
NRP1	-0.0716045	0.053213	-1.34562	0.178432	All	-0.1759	0.032691	0.576992	0.664602	0.0800674	-0.10774	0.0491917	-0.264673	-1.34562	0.178424	0.576926	C4
NRP2	-0.0341741	0.0550064	-0.621275	0.534422	All	-0.141985	0.0736365	0.829012	0.664602	0.082766	-0.0514204	0.110801	-0.213642	-0.621275	0.534419	0.829006	C4
NRTN	0.082216	0.0948198	0.867076	0.385906	All	-0.103627	0.268059	0.753036	0.664602	0.142672	0.123707	0.403344	-0.155929	0.867076	0.3859	0.753024	C4
NSFL1C	-0.108386	0.126141	-0.859242	0.390212	All	-0.355619	0.138847	0.756187	0.664602	0.1898	-0.163084	0.208924	-0.535092	-0.859242	0.390207	0.756164	C4
NT5C3A	-0.00313994	0.165909	-0.0189257	0.984901	All	-0.328316	0.322036	0.995534	0.664602	0.249637	-0.00472454	0.484563	-0.494012	-0.0189257	0.9849	0.995534	C4
NT5E	-0.18162	0.106913	-1.69876	0.0893719	All	-0.391165	0.0279257	0.456015	0.664602	0.160868	-0.273276	0.0420245	-0.588576	-1.69876	0.0893638	0.455974	C4
NTF3	-0.0901525	0.0680155	-1.32547	0.185023	All	-0.22346	0.0431555	0.584903	0.664602	0.10234	-0.135649	0.064938	-0.336236	-1.32547	0.185016	0.584878	C4
NTF4	0.132408	0.0723384	1.8304	0.0671978	All	-0.00937239	0.274189	0.407051	0.664602	0.108845	0.199229	0.412565	-0.0141062	1.8304	0.06719	0.406996	C4
ODAM	-0.0289629	0.101447	-0.285498	0.775264	All	-0.227795	0.16987	0.928411	0.664602	0.152643	-0.0435793	0.255602	-0.34276	-0.285498	0.775263	0.928409	C4
NTRK2	0.0514045	0.0491246	1.04641	0.295378	All	-0.0448779	0.147687	0.691607	0.664602	0.0739158	0.0773463	0.222221	-0.0675286	1.04641	0.295371	0.691591	C4
NTRK3	0.0635946	0.0437278	1.45433	0.145863	All	-0.0221102	0.149299	0.534993	0.664602	0.0657954	0.0956883	0.224647	-0.0332707	1.45433	0.145855	0.534951	C4
NUB1	0.0687481	0.159451	0.431155	0.666358	All	-0.24377	0.381266	0.882468	0.664602	0.239919	0.103443	0.573684	-0.366799	0.431155	0.666355	0.882462	C4
NUCB2	-0.0477571	0.0725679	-0.658103	0.510476	All	-0.189987	0.0944733	0.817172	0.664602	0.10919	-0.0718582	0.142154	-0.285871	-0.658103	0.510472	0.817165	C4
NUDC	-0.0112879	0.122006	-0.0925194	0.926286	All	-0.250415	0.227839	0.975947	0.664602	0.183577	-0.0169845	0.342827	-0.376796	-0.0925194	0.926285	0.975946	C4
NUDT2	0.0353183	0.107427	0.328765	0.742335	All	-0.175235	0.245871	0.913328	0.664602	0.161641	0.053142	0.369959	-0.263675	0.328765	0.742333	0.913325	C4
NUDT5	-0.114954	0.0981741	-1.17092	0.241638	All	-0.307372	0.0774636	0.647766	0.664602	0.147719	-0.172967	0.116562	-0.462496	-1.17092	0.24163	0.647746	C4
NXPH1	0.102015	0.0713759	1.42926	0.152937	All	-0.0378792	0.241909	0.547368	0.664602	0.107396	0.153498	0.363995	-0.0569993	1.42926	0.152929	0.547328	C4
OBP2B	-0.00314408	0.118307	-0.0265756	0.978798	All	-0.235021	0.228733	0.993915	0.664602	0.178012	-0.00473077	0.344172	-0.353633	-0.0265756	0.978798	0.993915	C4
NPTXR	-0.000602141	0.0662909	-0.00908332	0.992753	All	-0.13053	0.129326	0.998104	0.664602	0.0997452	-0.000906018	0.194595	-0.196407	-0.00908332	0.992753	0.998104	C4
NPTX1	0.0318528	0.0787396	0.404533	0.685823	All	-0.122474	0.186179	0.889881	0.664602	0.118476	0.0479276	0.280141	-0.184286	0.404533	0.685821	0.889878	C4
NME3	0.0511682	0.0449297	1.13885	0.254773	All	-0.0368924	0.139229	0.659133	0.664602	0.0676039	0.0769908	0.209495	-0.0555129	1.13885	0.254765	0.659111	C4
NELL1	-0.178942	0.0807247	-2.21669	0.0266498	All	-0.337159	-0.0207245	0.273222	0.664602	0.121463	-0.269247	-0.031179	-0.507315	-2.21669	0.0266439	0.273162	C4
NELL2	0.0152699	0.0553794	0.275732	0.782756	All	-0.0932718	0.123812	0.930265	0.664602	0.0833272	0.022976	0.186297	-0.140345	0.275732	0.782754	0.930263	C4
NFASC	-0.128127	0.0548892	-2.33429	0.0195859	All	-0.235708	-0.0205462	0.239358	0.664602	0.0825897	-0.192788	-0.0309121	-0.354664	-2.33429	0.0195808	0.239295	C4
NFATC1	-0.043992	0.184724	-0.238149	0.811766	All	-0.406045	0.318061	0.943317	0.664602	0.277947	-0.066193	0.478584	-0.610969	-0.238149	0.811765	0.943314	C4
NFATC3	-0.250615	0.114057	-2.19727	0.0280069	All	-0.474163	-0.027067	0.278986	0.664602	0.171617	-0.377091	-0.0407204	-0.713461	-2.19727	0.0280009	0.278927	C4
NFKBIE	-0.0568641	0.0925804	-0.614213	0.539078	All	-0.238318	0.12459	0.830795	0.664602	0.139302	-0.0855612	0.187471	-0.358593	-0.614213	0.539075	0.830789	C4
NGF	0.00137958	0.0232651	0.0592981	0.952715	All	-0.0442192	0.0469783	0.984731	0.664602	0.0350061	0.00207579	0.0706877	-0.0665361	0.0592981	0.952715	0.98473	C4
NID1	0.0260619	0.0733441	0.355337	0.722339	All	-0.11769	0.169814	0.906757	0.664602	0.110358	0.0392143	0.255516	-0.177087	0.355337	0.722337	0.906755	C4
NID2	0.0526627	0.142672	0.369116	0.712043	All	-0.22697	0.332296	0.90186	0.664602	0.214674	0.0792394	0.5	-0.341521	0.369116	0.712041	0.901857	C4
NINJ1	0.100005	0.106022	0.943241	0.345564	All	-0.107795	0.307804	0.726242	0.664602	0.159528	0.150473	0.463147	-0.162201	0.943241	0.345558	0.72621	C4
NPTN	0.133301	0.15178	0.878252	0.379813	All	-0.164182	0.430783	0.749871	0.664602	0.228377	0.200572	0.648191	-0.247046	0.878252	0.379807	0.749858	C4
NMNAT1	-0.117198	0.142155	-0.824438	0.409696	All	-0.395816	0.16142	0.767522	0.664602	0.213895	-0.176343	0.242891	-0.595576	-0.824438	0.409691	0.767511	C4
NOMO1	-0.100684	0.0473266	-2.12744	0.0333901	All	-0.193443	-0.00792597	0.305211	0.664602	0.0712105	-0.151496	-0.0119233	-0.291068	-2.12744	0.0333837	0.305153	C4
NOS1	0.0607223	0.101333	0.599235	0.549019	All	-0.137887	0.259331	0.836284	0.664602	0.152472	0.0913664	0.390211	-0.207478	0.599235	0.549016	0.836279	C4
NOS3	-0.110483	0.10079	-1.09617	0.27301	All	-0.308029	0.0870616	0.674623	0.664602	0.151655	-0.16624	0.131004	-0.463484	-1.09617	0.273003	0.67458	C4
NOTCH1	0.0448814	0.0302281	1.48476	0.137615	All	-0.0143645	0.104127	0.525623	0.664602	0.045483	0.0675313	0.156678	-0.0216153	1.48476	0.137607	0.525555	C4
NOTCH3	0.256079	0.0660711	3.8758	0.000106451	All	0.126582	0.385576	0.00810175	0.664602	0.0994145	0.385311	0.580164	0.190459	3.8758	0.000106273	0.00808607	C4
NPDC1	0.0601985	0.0606265	0.992941	0.320745	All	-0.0586272	0.179024	0.709296	0.664602	0.0912223	0.0905783	0.269374	-0.0882173	0.992941	0.320739	0.709282	C4
NPPB	-0.434162	0.251736	-1.72467	0.0845946	All	-0.927555	0.0592313	0.445915	0.664602	0.378777	-0.653266	0.0891366	-1.39567	-1.72467	0.0845865	0.445872	C4
NPPC	-0.217481	0.0916564	-2.37279	0.0176595	All	-0.397124	-0.0378377	0.225989	0.664602	0.137912	-0.327235	-0.0569279	-0.597542	-2.37279	0.0176545	0.225927	C4
NEFL	-0.0322463	0.083023	-0.388402	0.697721	All	-0.194968	0.130476	0.893285	0.664602	0.124921	-0.0485198	0.196326	-0.293366	-0.388402	0.697719	0.893279	C4
TFRC	-0.0339619	0.0742185	-0.457593	0.647247	All	-0.179427	0.111504	0.874919	0.664602	0.111674	-0.0511011	0.167779	-0.269981	-0.457593	0.647245	0.874912	C4
THOP1	-0.209443	0.0599071	-3.49613	0.000472588	All	-0.326859	-0.0920275	0.0242264	0.664602	0.0901399	-0.315141	-0.138467	-0.491815	-3.49613	0.000472052	0.0241989	C4
THBS4	-0.281654	0.0905303	-3.11116	0.00186494	All	-0.45909	-0.104218	0.0615537	0.664602	0.136217	-0.423794	-0.156808	-0.69078	-3.11116	0.00186356	0.0614731	C4
THBS2	-0.108219	0.0721945	-1.49899	0.133883	All	-0.249718	0.0332795	0.521656	0.664602	0.108628	-0.162833	0.0500783	-0.375745	-1.49899	0.133875	0.521578	C4
THBD	0.0914599	0.0541986	1.68749	0.0915164	All	-0.0147675	0.197687	0.459792	0.664602	0.0815505	0.137616	0.297455	-0.022223	1.68749	0.0915083	0.459744	C4
TGM2	-0.120642	0.140726	-0.857279	0.391296	All	-0.39646	0.155177	0.756187	0.664602	0.211745	-0.181525	0.233496	-0.596545	-0.857279	0.391291	0.756164	C4
TGFBR3	0.185111	0.0612119	3.02409	0.00249545	All	0.0651374	0.305084	0.0722521	0.664602	0.0921032	0.278529	0.459051	0.0980063	3.02409	0.0024938	0.0721623	C4
TGFBR2	0.200154	0.0643437	3.1107	0.00186782	All	0.0740427	0.326266	0.0615537	0.664602	0.0968155	0.301164	0.490922	0.111406	3.1107	0.00186644	0.0614731	C4
TGFBI	-0.127693	0.051668	-2.47142	0.013462	All	-0.228961	-0.026426	0.198755	0.664602	0.0777428	-0.192135	-0.0397594	-0.344511	-2.47142	0.0134577	0.198616	C4
TGFB1	0.0393712	0.0748101	0.526282	0.598695	All	-0.107254	0.185996	0.856424	0.664602	0.112564	0.0592403	0.279865	-0.161385	0.526282	0.598692	0.856419	C4
TGFA	-0.207112	0.0904426	-2.28998	0.0220279	All	-0.384376	-0.0298475	0.253543	0.664602	0.136085	-0.311633	-0.0449055	-0.57836	-2.28998	0.0220225	0.253481	C4
TCL1B	0.235614	0.151206	1.55823	0.119186	All	-0.0607441	0.531973	0.504484	0.664602	0.227514	0.35452	0.800446	-0.0914074	1.55823	0.119178	0.504449	C4
TFPI2	0.0914507	0.0738811	1.23781	0.215794	All	-0.0533535	0.236255	0.618868	0.664602	0.111166	0.137602	0.355487	-0.080283	1.23781	0.215787	0.618828	C4
TFPI	-0.0202438	0.0594589	-0.340468	0.733506	All	-0.136781	0.0962934	0.911101	0.664602	0.0894654	-0.0304601	0.144892	-0.205812	-0.340468	0.733504	0.911096	C4
TFF3	-0.166532	0.0878702	-1.89521	0.0580721	All	-0.338755	0.00568995	0.38536	0.664602	0.132215	-0.250575	0.00856621	-0.509716	-1.89521	0.0580646	0.38531	C4
TFF2	0.0942523	0.11293	0.834607	0.403944	All	-0.127087	0.315591	0.763034	0.664602	0.169922	0.141818	0.474864	-0.191229	0.834607	0.403939	0.763015	C4
TFF1	0.258236	0.147268	1.75351	0.0795231	All	-0.0304046	0.546876	0.436332	0.664602	0.221589	0.388557	0.822871	-0.0457566	1.75351	0.0795151	0.436237	C4
TEK	-0.0722409	0.0416844	-1.73304	0.0830958	All	-0.153941	0.00945899	0.441954	0.664602	0.0627208	-0.108698	0.0142348	-0.231631	-1.73304	0.0830877	0.441873	C4
TDRKH	-0.0642716	0.158616	-0.405202	0.685332	All	-0.375154	0.246611	0.889881	0.664602	0.238664	-0.0967069	0.371074	-0.564488	-0.405202	0.685329	0.889878	C4
TDGF1	-0.354103	0.274704	-1.28903	0.197394	All	-0.892514	0.184307	0.602838	0.664602	0.413337	-0.532805	0.277335	-1.34294	-1.28903	0.197386	0.602814	C4
TCN2	0.0649284	0.057919	1.12102	0.262286	All	-0.0485907	0.178448	0.663741	0.664602	0.0871484	0.0976952	0.268506	-0.0731157	1.12102	0.262279	0.663723	C4
THPO	0.0547909	0.0726434	0.754245	0.450707	All	-0.0875875	0.197169	0.788467	0.664602	0.109304	0.0824417	0.296677	-0.131793	0.754245	0.450702	0.788446	C4
THY1	-0.0306161	0.0569668	-0.537438	0.590968	All	-0.142269	0.0810367	0.852568	0.664602	0.0857156	-0.0460668	0.121936	-0.214069	-0.537438	0.590965	0.852563	C4
TMPRSS15	-0.14098	0.174794	-0.806549	0.419931	All	-0.483569	0.20161	0.774315	0.664602	0.263005	-0.212126	0.303363	-0.727616	-0.806549	0.419926	0.774292	C4
TNFRSF11B	-0.0564007	0.0567315	-0.994169	0.320147	All	-0.167592	0.054791	0.70901	0.664602	0.0853617	-0.084864	0.0824449	-0.252173	-0.994169	0.32014	0.708984	C4
TNFRSF11A	-0.030292	0.0771275	-0.392752	0.694505	All	-0.181459	0.120875	0.891902	0.664602	0.116051	-0.0455791	0.18188	-0.273038	-0.392752	0.694503	0.891897	C4
TNFRSF10C	0.0341546	0.0960219	0.355695	0.722071	All	-0.154045	0.222354	0.9067	0.664602	0.14448	0.051391	0.334573	-0.231791	0.355695	0.722069	0.906697	C4
TNFRSF10B	-0.0819628	0.079636	-1.02922	0.303384	All	-0.238046	0.0741209	0.697089	0.664602	0.119825	-0.123326	0.111531	-0.358183	-1.02922	0.303377	0.697071	C4
TNFRSF10A	0.00303944	0.0646043	0.047047	0.962476	All	-0.123583	0.129662	0.988989	0.664602	0.0972076	0.00457332	0.1951	-0.185953	0.047047	0.962476	0.988989	C4
TNFAIP8	0.124915	0.0687908	1.81586	0.0693992	All	-0.0099128	0.259742	0.412885	0.664602	0.103507	0.187954	0.390828	-0.0149191	1.81586	0.0693913	0.412797	C4
TNF	0.0596245	0.0721499	0.826398	0.408584	All	-0.0817866	0.201036	0.767522	0.664602	0.108561	0.0897146	0.302494	-0.123065	0.826398	0.408578	0.767511	C4
TNC	0.0111977	0.0920469	0.121653	0.903175	All	-0.169211	0.191606	0.969773	0.664602	0.138499	0.0168488	0.288308	-0.25461	0.121653	0.903174	0.969772	C4
TMSB10	-0.0176823	0.14802	-0.119459	0.904912	All	-0.307796	0.272431	0.970511	0.664602	0.22272	-0.0266059	0.409925	-0.463136	-0.119459	0.904912	0.970511	C4
TMPRSS5	0.0740188	0.0736979	1.00435	0.315214	All	-0.0704264	0.218464	0.706163	0.664602	0.11089	0.111373	0.328718	-0.105972	1.00435	0.315208	0.706132	C4
TIA1	-0.0585567	0.226179	-0.258896	0.795717	All	-0.501859	0.384745	0.936463	0.664602	0.340322	-0.0881079	0.578923	-0.755139	-0.258896	0.795716	0.936461	C4
TLR3	-0.00371874	0.119849	-0.0310285	0.975247	All	-0.238619	0.231181	0.993042	0.664602	0.180332	-0.00559544	0.347855	-0.359046	-0.0310285	0.975247	0.993042	C4
TJAP1	-0.107493	0.157963	-0.680499	0.496193	All	-0.417094	0.202108	0.80848	0.664602	0.23768	-0.161741	0.304112	-0.627594	-0.680499	0.496189	0.808474	C4
TINAGL1	0.0641907	0.042659	1.50474	0.1324	All	-0.0194195	0.147801	0.52161	0.664602	0.0641874	0.0965852	0.222392	-0.029222	1.50474	0.132391	0.521549	C4
TIMP4	0.211898	0.07694	2.75407	0.00588877	All	0.0610982	0.362697	0.126705	0.664602	0.115769	0.318834	0.545741	0.0919279	2.75407	0.00588599	0.126576	C4
TIMP3	-0.18978	0.253921	-0.747396	0.454829	All	-0.687456	0.307897	0.790137	0.664602	0.382065	-0.285554	0.463294	-1.0344	-0.747396	0.454824	0.790129	C4
TIMP1	-0.0636142	0.0550231	-1.15614	0.247632	All	-0.171457	0.044229	0.653631	0.664602	0.082791	-0.0957178	0.0665526	-0.257988	-1.15614	0.247625	0.65359	C4
TIMD4	-0.050776	0.0851784	-0.596114	0.551103	All	-0.217723	0.116171	0.836676	0.664602	0.128165	-0.0764007	0.174802	-0.327603	-0.596114	0.551099	0.83667	C4
TIGAR	0.0862311	0.0894283	0.964249	0.334927	All	-0.0890451	0.261507	0.719313	0.664602	0.134559	0.129749	0.393485	-0.133987	0.964249	0.334921	0.719285	C4
TIE1	0.0415057	0.080394	0.516279	0.605663	All	-0.116064	0.199075	0.859339	0.664602	0.120966	0.062452	0.299545	-0.174641	0.516279	0.60566	0.859331	C4
TNFRSF12A	-0.120969	0.0688294	-1.75752	0.0788364	All	-0.255873	0.0139338	0.435386	0.664602	0.103565	-0.182018	0.0209693	-0.385005	-1.75752	0.0788284	0.435335	C4
TCL1A	0.332773	0.185594	1.79302	0.0729775	All	-0.0309836	0.69653	0.421841	0.664602	0.279255	0.500711	1.04805	-0.0466299	1.79302	0.0729696	0.421788	C4
GFER	-0.130624	0.120406	-1.08486	0.27799	All	-0.366617	0.105368	0.67965	0.664602	0.181171	-0.196545	0.15855	-0.55164	-1.08486	0.277983	0.67963	C4
STK11	0.0010853	0.137011	0.00792127	0.99368	All	-0.267451	0.269621	0.998388	0.664602	0.206155	0.00163301	0.405696	-0.40243	0.00792127	0.99368	0.998388	C4
STIP1	-0.0674116	0.12498	-0.539378	0.58963	All	-0.312369	0.177546	0.851828	0.664602	0.188053	-0.101432	0.267153	-0.470016	-0.539378	0.589626	0.851818	C4
STC2	-0.101882	0.0496338	-2.05267	0.0401117	All	-0.199162	-0.0046012	0.328548	0.664602	0.0746821	-0.153297	-0.00692055	-0.299674	-2.05267	0.0401049	0.328407	C4
STC1	-0.0945617	0.0864941	-1.09327	0.274281	All	-0.264087	0.0749636	0.67553	0.664602	0.130144	-0.142283	0.112799	-0.397366	-1.09327	0.274274	0.675487	C4
STAT5B	-0.248514	0.259655	-0.957092	0.338527	All	-0.757429	0.260401	0.720799	0.664602	0.390693	-0.373929	0.391829	-1.13969	-0.957092	0.338521	0.720786	C4
STAMBP	-0.121615	0.120918	-1.00577	0.314535	All	-0.35861	0.11538	0.706163	0.664602	0.181941	-0.18299	0.173614	-0.539593	-1.00577	0.314529	0.706132	C4
GDF15	-0.225718	0.0865899	-2.60675	0.00914419	All	-0.395431	-0.0560051	0.161722	0.664602	0.130288	-0.339629	-0.0842639	-0.594995	-2.60675	0.00914063	0.161605	C4
GDF2	-0.0413649	0.0693247	-0.596684	0.550722	All	-0.177239	0.094509	0.836676	0.664602	0.10431	-0.0622402	0.142208	-0.266688	-0.596684	0.550718	0.83667	C4
GDNF	-0.105445	0.0718257	-1.46806	0.142096	All	-0.24622	0.0353312	0.531117	0.664602	0.108073	-0.158658	0.0531654	-0.370482	-1.46806	0.142087	0.53105	C4
GFAP	-0.036838	0.0872904	-0.422016	0.673016	All	-0.207924	0.134248	0.884923	0.664602	0.131342	-0.0554286	0.202002	-0.31286	-0.422016	0.673013	0.884916	C4
GH2	0.103956	0.312832	0.332304	0.739661	All	-0.509185	0.717096	0.912525	0.664602	0.470706	0.156418	1.079	-0.766167	0.332304	0.739659	0.912523	C4
GFOD2	0.169474	0.235605	0.719316	0.471951	All	-0.292303	0.631251	0.797404	0.664602	0.354505	0.255001	0.949832	-0.439829	0.719316	0.471946	0.79739	C4
GFRA1	0.0127881	0.0555747	0.230107	0.81801	All	-0.0961363	0.121713	0.945376	0.664602	0.0836211	0.0192418	0.183139	-0.144656	0.230107	0.818009	0.945375	C4
GFRA2	0.092338	0.039803	2.31988	0.0203528	All	0.0143256	0.17035	0.243933	0.664602	0.05989	0.138937	0.256322	0.021553	2.31988	0.0203476	0.243869	C4
GFRA3	0.0162025	0.0539405	0.300377	0.763891	All	-0.0895189	0.121924	0.922351	0.664602	0.0811621	0.0243792	0.183457	-0.134699	0.300377	0.76389	0.922349	C4
GGA1	-0.077998	0.131324	-0.593938	0.552557	All	-0.335387	0.179391	0.837282	0.664602	0.197597	-0.11736	0.26993	-0.504651	-0.593938	0.552554	0.83727	C4
GGH	-0.151988	0.0683211	-2.22461	0.0261134	All	-0.285894	-0.0180807	0.272809	0.664602	0.1028	-0.22869	-0.0272017	-0.430178	-2.22461	0.0261076	0.272695	C4
GGT1	-0.442014	0.099122	-4.45929	8.24655e-06	All	-0.63629	-0.247738	0.00124637	0.664602	0.149145	-0.665081	-0.372757	-0.957405	-4.45929	8.22312e-06	0.00124283	C4
GGT5	-0.0478491	0.0437587	-1.09348	0.274192	All	-0.133615	0.0379163	0.67553	0.664602	0.0658419	-0.0719966	0.0570536	-0.201047	-1.09348	0.274185	0.675487	C4
GH1	0.576432	0.34842	1.65441	0.0980517	All	-0.10646	1.25932	0.471259	0.664602	0.524254	0.867334	1.89487	-0.160205	1.65441	0.0980434	0.471213	C4
STK24	0.0229366	0.1159	0.197899	0.843125	All	-0.204224	0.250097	0.955701	0.664602	0.174391	0.0345117	0.376318	-0.307294	0.197899	0.843124	0.955699	C4
STK4	0.102235	0.166167	0.615252	0.538392	All	-0.223447	0.427916	0.830795	0.664602	0.250025	0.153828	0.643877	-0.33622	0.615252	0.538388	0.830789	C4
SUSD2	-0.0894064	0.0567009	-1.57681	0.114848	All	-0.200538	0.0217254	0.49815	0.664602	0.0853157	-0.134526	0.0326924	-0.301745	-1.57681	0.11484	0.498114	C4
TBCC	-0.150856	0.153605	-0.982099	0.326058	All	-0.451916	0.150205	0.713307	0.664602	0.231124	-0.226986	0.226016	-0.679989	-0.982099	0.326051	0.713293	C4
TBCB	-0.160581	0.189881	-0.845692	0.39773	All	-0.532741	0.211579	0.760415	0.664602	0.285707	-0.24162	0.318365	-0.801604	-0.845692	0.397725	0.760405	C4
TBC1D5	0.0409414	0.151528	0.27019	0.787015	All	-0.256048	0.337931	0.931539	0.664602	0.227998	0.0616029	0.508479	-0.385274	0.27019	0.787014	0.931537	C4
TBC1D23	0.0172428	0.171121	0.100764	0.919738	All	-0.318148	0.352634	0.975136	0.664602	0.257479	0.0259446	0.530603	-0.478714	0.100764	0.919738	0.975136	C4
TBC1D17	-0.103903	0.0830331	-1.25134	0.210818	All	-0.266645	0.0588392	0.613281	0.664602	0.124937	-0.156338	0.0885376	-0.401214	-1.25134	0.21081	0.613255	C4
TARBP2	-0.0697598	0.147792	-0.472014	0.636919	All	-0.359426	0.219907	0.870538	0.664602	0.222376	-0.104965	0.330893	-0.540822	-0.472014	0.636917	0.870529	C4
TANK	0.0672884	0.131275	0.512577	0.60825	All	-0.190006	0.324582	0.859339	0.664602	0.197524	0.101246	0.488393	-0.285901	0.512577	0.608247	0.859331	C4
TAFA5	0.130276	0.0689186	1.89029	0.0587262	All	-0.00480156	0.265354	0.385923	0.664602	0.103699	0.196022	0.399272	-0.00722846	1.89029	0.0587187	0.385797	C4
TACSTD2	0.0668686	0.0534288	1.25155	0.210743	All	-0.03785	0.171587	0.613281	0.664602	0.0803922	0.100615	0.258183	-0.0569542	1.25155	0.210736	0.613255	C4
TACC3	-0.0313635	0.221909	-0.141335	0.887606	All	-0.466297	0.40357	0.964568	0.664602	0.333897	-0.0471914	0.607248	-0.70163	-0.141335	0.887605	0.964567	C4
STX16	0.0676537	0.107459	0.629578	0.528974	All	-0.142962	0.278269	0.825938	0.664602	0.161689	0.101796	0.418706	-0.215115	0.629578	0.528971	0.825923	C4
SUSD1	-0.0251974	0.0915742	-0.275159	0.783196	All	-0.20468	0.154285	0.930397	0.664602	0.137788	-0.0379136	0.232151	-0.307978	-0.275159	0.783194	0.930393	C4
SUMF2	0.0239795	0.102129	0.234796	0.814368	All	-0.176189	0.224148	0.943976	0.664602	0.153669	0.0360809	0.337272	-0.26511	0.234796	0.814367	0.943972	C4
SULT2A1	-0.41802	0.108695	-3.84581	0.000120347	All	-0.631058	-0.204982	0.00871873	0.664602	0.163549	-0.628978	-0.308423	-0.949534	-3.84581	0.000120153	0.00870462	C4
SULT1A1	0.171595	0.247374	0.693666	0.487896	All	-0.313249	0.656439	0.804589	0.664602	0.372214	0.258192	0.987731	-0.471347	0.693666	0.487892	0.804571	C4
SUGT1	-0.0751954	0.149797	-0.501981	0.615684	All	-0.368792	0.218402	0.862109	0.664602	0.225394	-0.113143	0.328629	-0.554916	-0.501981	0.615681	0.862104	C4
STXBP3	-0.0111347	0.0816112	-0.136436	0.891477	All	-0.17109	0.14882	0.966346	0.664602	0.122797	-0.016754	0.223928	-0.257436	-0.136436	0.891477	0.966345	C4
STX8	-0.000203648	0.0938792	-0.00216926	0.998269	All	-0.184204	0.183796	0.998953	0.664602	0.141256	-0.000306422	0.276556	-0.277169	-0.00216926	0.998269	0.998953	C4
STX6	0.226718	0.126967	1.78565	0.0741632	All	-0.0221316	0.475568	0.425581	0.664602	0.191042	0.341134	0.715576	-0.0333074	1.78565	0.0741553	0.425531	C4
STX4	0.0137824	0.11547	0.119358	0.904992	All	-0.212536	0.2401	0.970511	0.664602	0.173744	0.0207378	0.361276	-0.3198	0.119358	0.904992	0.970511	C4
TBL1X	-0.20439	0.1586	-1.28871	0.197507	All	-0.515241	0.106461	0.602838	0.664602	0.23864	-0.307537	0.160197	-0.775271	-1.28871	0.1975	0.602814	C4
VEGFC	-0.0293662	0.107121	-0.274139	0.783979	All	-0.23932	0.180588	0.930584	0.664602	0.161181	-0.0441861	0.27173	-0.360102	-0.274139	0.783978	0.930582	C4
VSTM2L	-0.349494	0.110243	-3.17021	0.00152449	All	-0.565567	-0.133421	0.0534548	0.664602	0.165879	-0.52587	-0.200748	-0.850992	-3.17021	0.00152329	0.0534126	C4
VSTM1	0.107057	0.0935847	1.14396	0.252649	All	-0.0763658	0.29048	0.657968	0.664602	0.140813	0.161084	0.437078	-0.11491	1.14396	0.252642	0.657949	C4
VSIR	0.0525902	0.118011	0.445637	0.655862	All	-0.178708	0.283888	0.877485	0.664602	0.177567	0.0791304	0.427161	-0.268901	0.445637	0.655859	0.877482	C4
VSIG4	-0.0154846	0.0815679	-0.189837	0.849438	All	-0.175355	0.144386	0.957092	0.664602	0.122732	-0.0232991	0.217256	-0.263854	-0.189837	0.849437	0.957091	C4
VPS53	-0.107994	0.146598	-0.736669	0.461328	All	-0.395321	0.179332	0.793369	0.664602	0.22058	-0.162494	0.269842	-0.594831	-0.736669	0.461324	0.793361	C4
VPS37A	-0.15018	0.151579	-0.990769	0.321804	All	-0.447269	0.14691	0.709671	0.664602	0.228075	-0.22597	0.221057	-0.672997	-0.990769	0.321798	0.709656	C4
VNN2	-0.193216	0.0885838	-2.18117	0.0291769	All	-0.366837	-0.0195952	0.284499	0.664602	0.133288	-0.290725	-0.0294794	-0.55197	-2.18117	0.0291709	0.28444	C4
VMO1	0.06899	0.130618	0.52818	0.597377	All	-0.187017	0.324997	0.856013	0.664602	0.196536	0.103806	0.489017	-0.281404	0.52818	0.597374	0.856002	C4
VIM	-0.0583492	0.219892	-0.265354	0.790739	All	-0.48933	0.372632	0.93383	0.664602	0.330863	-0.0877957	0.560696	-0.736287	-0.265354	0.790737	0.933828	C4
VEGFD	-0.0830017	0.0711245	-1.16699	0.24322	All	-0.222403	0.0563996	0.649625	0.664602	0.107018	-0.124889	0.0848661	-0.334645	-1.16699	0.243213	0.649606	C4
USO1	-0.127243	0.170847	-0.744776	0.456412	All	-0.462097	0.207612	0.791355	0.664602	0.257067	-0.191457	0.312394	-0.695309	-0.744776	0.456407	0.791338	C4
VEGFA	-0.183738	0.113108	-1.62445	0.104287	All	-0.405425	0.0379487	0.483182	0.664602	0.170189	-0.276464	0.057106	-0.610034	-1.62445	0.104279	0.483144	C4
VCAN	0.0815443	0.0578368	1.4099	0.158576	All	-0.0318138	0.194902	0.554038	0.664602	0.0870248	0.122696	0.293265	-0.0478721	1.4099	0.158568	0.55401	C4
VCAM1	0.0410715	0.0520424	0.789193	0.430004	All	-0.0609298	0.143073	0.778634	0.664602	0.0783062	0.0617987	0.215279	-0.0916815	0.789193	0.429999	0.778624	C4
VAT1	0.00889009	0.0378604	0.234812	0.814356	All	-0.0653149	0.0830951	0.943976	0.664602	0.056967	0.0133766	0.125032	-0.0982788	0.234812	0.814354	0.943972	C4
VASN	0.0967388	0.0516726	1.87215	0.0611936	All	-0.00453761	0.198015	0.39176	0.664602	0.0777497	0.145559	0.297949	-0.00683036	1.87215	0.0611859	0.391671	C4
VASH1	-0.0702511	0.155755	-0.451035	0.651967	All	-0.375526	0.235024	0.877067	0.664602	0.234359	-0.105704	0.353639	-0.565047	-0.451035	0.651964	0.877064	C4
VAMP5	0.0186623	0.101906	0.183133	0.854695	All	-0.181069	0.218394	0.959561	0.664602	0.153334	0.0280805	0.328615	-0.272454	0.183133	0.854694	0.95956	C4
UXS1	-0.0267369	0.0996301	-0.268362	0.788422	All	-0.222008	0.168535	0.932449	0.664602	0.149909	-0.0402299	0.253593	-0.334053	-0.268362	0.788421	0.932447	C4
USP8	-0.0400186	0.179094	-0.22345	0.823186	All	-0.391036	0.310999	0.946626	0.664602	0.269476	-0.0602144	0.467958	-0.588386	-0.22345	0.823185	0.946624	C4
VTA1	0.101775	0.137202	0.741794	0.458216	All	-0.167135	0.370686	0.79221	0.664602	0.206442	0.153137	0.557763	-0.251489	0.741794	0.458212	0.79219	C4
VTCN1	-0.0227017	0.0598482	-0.379322	0.704451	All	-0.140002	0.0945986	0.896983	0.664602	0.0900512	-0.0341583	0.142342	-0.210659	-0.379322	0.704449	0.896979	C4
WFIKKN2	0.0807026	0.0690238	1.1692	0.242331	All	-0.0545816	0.215987	0.648602	0.664602	0.103857	0.12143	0.324991	-0.0821306	1.1692	0.242324	0.648559	C4
ZBTB16	-0.0799918	0.133537	-0.599025	0.54916	All	-0.341719	0.181735	0.836333	0.664602	0.200927	-0.120361	0.273457	-0.514178	-0.599025	0.549156	0.836328	C4
YTHDF3	0.0417483	0.159787	0.261275	0.793882	All	-0.271428	0.354925	0.935386	0.664602	0.240425	0.0628171	0.53405	-0.408416	0.261275	0.79388	0.935384	C4
YES1	-0.17619	0.216212	-0.814896	0.415137	All	-0.599957	0.247577	0.770745	0.664602	0.325325	-0.265106	0.372531	-0.902743	-0.814896	0.415132	0.770728	C4
XRCC4	0.0283376	0.0704162	0.40243	0.68737	All	-0.109676	0.166351	0.889881	0.664602	0.105953	0.0426385	0.250305	-0.165028	0.40243	0.687368	0.889878	C4
XPNPEP2	0.289944	0.188205	1.54058	0.123428	All	-0.0789303	0.658818	0.510021	0.664602	0.283184	0.436267	0.991308	-0.118774	1.54058	0.123419	0.509957	C4
XG	0.111288	0.0625305	1.77975	0.0751256	All	-0.0112692	0.233846	0.425581	0.664602	0.0940872	0.167451	0.351862	-0.0169596	1.77975	0.0751176	0.425531	C4
XCL1	0.0696766	0.106732	0.65282	0.513876	All	-0.139514	0.278867	0.818571	0.664602	0.160595	0.10484	0.419605	-0.209926	0.65282	0.513872	0.818558	C4
WWP2	-0.036656	0.101821	-0.360006	0.718845	All	-0.236221	0.162909	0.905098	0.664602	0.153205	-0.0551549	0.245128	-0.355437	-0.360006	0.718843	0.905092	C4
WNT9A	0.0465833	0.0538235	0.865482	0.38678	All	-0.0589088	0.152075	0.754117	0.664602	0.080986	0.070092	0.228825	-0.0886406	0.865482	0.386774	0.754106	C4
WIF1	0.172884	0.0665172	2.59909	0.00935077	All	0.0425127	0.303255	0.163082	0.664602	0.100086	0.260132	0.4563	0.0639636	2.59909	0.00934718	0.163019	C4
VWA1	-0.258304	0.0844926	-3.05712	0.0022363	All	-0.423907	-0.0927015	0.0684907	0.664602	0.127133	-0.38866	-0.13948	-0.63784	-3.05712	0.00223476	0.0683884	C4
WFIKKN1	-0.0510794	0.0791898	-0.645024	0.518915	All	-0.206289	0.10413	0.821085	0.664602	0.119154	-0.0768571	0.156684	-0.310399	-0.645024	0.518911	0.821079	C4
WFDC2	-0.0872579	0.0759906	-1.14827	0.250863	All	-0.236197	0.0616809	0.656438	0.664602	0.11434	-0.131293	0.092813	-0.3554	-1.14827	0.250856	0.65642	C4
WFDC12	-0.127772	0.124802	-1.0238	0.305937	All	-0.372378	0.116835	0.699125	0.664602	0.187784	-0.192253	0.175804	-0.560309	-1.0238	0.30593	0.69911	C4
WASF3	0.198643	0.158304	1.25482	0.209552	All	-0.111627	0.508913	0.612433	0.664602	0.238194	0.29889	0.765749	-0.167969	1.25482	0.209544	0.612376	C4
WASF1	0.0898864	0.17532	0.512699	0.608165	All	-0.253735	0.433507	0.859339	0.664602	0.263797	0.135249	0.652291	-0.381794	0.512699	0.608162	0.859331	C4
WAS	0.182029	0.126249	1.44183	0.14936	All	-0.0654145	0.429473	0.540574	0.664602	0.189962	0.273892	0.646218	-0.0984334	1.44183	0.149351	0.540539	C4
WARS	-0.155479	0.072915	-2.13233	0.0329857	All	-0.29839	-0.0125684	0.305014	0.664602	0.109712	-0.233943	-0.0189072	-0.44898	-2.13233	0.0329794	0.304955	C4
VWF	0.181007	0.143573	1.26073	0.207414	All	-0.100391	0.462405	0.611397	0.664602	0.216029	0.272354	0.69577	-0.151063	1.26073	0.207406	0.61137	C4
VWC2	0.137494	0.0756992	1.81631	0.0693301	All	-0.0108742	0.285861	0.412872	0.664602	0.113902	0.206881	0.430128	-0.0163661	1.81631	0.0693223	0.412797	C4
ZBTB17	0.108992	0.0804044	1.35554	0.175253	All	-0.0485982	0.266581	0.572527	0.664602	0.120981	0.163995	0.401119	-0.0731281	1.35554	0.175245	0.572471	C4
UMOD	0.115444	0.106236	1.08668	0.277186	All	-0.0927742	0.323662	0.678908	0.664602	0.159849	0.173704	0.487007	-0.139599	1.08668	0.277179	0.678889	C4
TNFRSF9	0.147345	0.0783346	1.88097	0.059984	All	-0.00618819	0.300878	0.389208	0.664602	0.117867	0.221704	0.452723	-0.00931538	1.88097	0.0599764	0.389158	C4
TP53	-0.0597653	0.0816786	-0.731713	0.464348	All	-0.219853	0.100322	0.794905	0.664602	0.122899	-0.0899265	0.150955	-0.330808	-0.731713	0.464344	0.794888	C4
TNXB	0.0345911	0.04874	0.709705	0.477891	All	-0.0609376	0.13012	0.800815	0.664602	0.0733372	0.0520478	0.195789	-0.0916931	0.709705	0.477887	0.800799	C4
TNR	-0.0625476	0.0825148	-0.758017	0.448446	All	-0.224274	0.0991784	0.787475	0.664602	0.124157	-0.0941129	0.149234	-0.33746	-0.758017	0.448441	0.787466	C4
TNNI3	0.114052	0.159407	0.71548	0.474317	All	-0.198379	0.426483	0.798031	0.664602	0.239853	0.17161	0.641721	-0.298502	0.71548	0.474313	0.798016	C4
TNFSF14	-0.0149651	0.111518	-0.134194	0.89325	All	-0.233537	0.203607	0.966619	0.664602	0.167797	-0.0225174	0.306366	-0.3514	-0.134194	0.893249	0.966617	C4
TNFSF13B	-0.0046181	0.0540052	-0.0855121	0.931855	All	-0.110466	0.10123	0.978153	0.664602	0.0812594	-0.00694867	0.15232	-0.166217	-0.0855121	0.931854	0.978152	C4
TNFSF13	0.032158	0.0515489	0.623836	0.532739	All	-0.0688759	0.133192	0.827958	0.664602	0.0775635	0.0483869	0.200411	-0.103638	0.623836	0.532735	0.827947	C4
TNFSF12	0.174613	0.0555252	3.14475	0.00166355	All	0.0657855	0.28344	0.0571871	0.664602	0.0835465	0.262733	0.426484	0.0989819	3.14475	0.00166228	0.0571434	C4
TNFSF11	0.0426205	0.118283	0.360327	0.718605	All	-0.18921	0.274451	0.905098	0.664602	0.177976	0.0641294	0.412962	-0.284703	0.360327	0.718603	0.905092	C4
TNFSF10	0.0727419	0.0497981	1.46074	0.144096	All	-0.0248605	0.170344	0.533481	0.664602	0.0749292	0.109452	0.256313	-0.0374093	1.46074	0.144087	0.533424	C4
TNFRSF13B	0.0557149	0.0650693	0.856239	0.391871	All	-0.0718186	0.183248	0.756187	0.664602	0.0979072	0.083832	0.27573	-0.108066	0.856239	0.391865	0.756164	C4
TNFRSF8	0.164266	0.0868029	1.8924	0.058445	All	-0.00586456	0.334396	0.385923	0.664602	0.130609	0.247164	0.503158	-0.00882887	1.8924	0.0584374	0.385797	C4
TNFRSF6B	-0.23093	0.10952	-2.10856	0.0349891	All	-0.445586	-0.0162743	0.308566	0.664602	0.164791	-0.347472	-0.0244814	-0.670462	-2.10856	0.0349826	0.308508	C4
TNFRSF4	0.162636	0.0733094	2.21849	0.0265275	All	0.0189521	0.30632	0.273222	0.664602	0.110306	0.244712	0.460911	0.0285126	2.21849	0.0265217	0.273162	C4
TNFRSF21	0.135522	0.0528913	2.56228	0.0104026	All	0.0318572	0.239187	0.173034	0.664602	0.0795835	0.203915	0.359899	0.0479315	2.56228	0.0103988	0.172971	C4
TNFRSF1B	0.115462	0.07104	1.62531	0.104105	All	-0.023774	0.254698	0.483144	0.664602	0.106891	0.173731	0.383237	-0.0357756	1.62531	0.104097	0.483072	C4
TNFRSF1A	0.0338194	0.0591086	0.572156	0.567219	All	-0.0820314	0.14967	0.843633	0.664602	0.0889384	0.0508867	0.225206	-0.123433	0.572156	0.567216	0.843628	C4
TNFRSF19	0.155906	0.0606857	2.56908	0.0102008	All	0.0369643	0.274848	0.171056	0.664602	0.0913113	0.234586	0.413556	0.0556155	2.56908	0.010197	0.170919	C4
TNFRSF14	0.0985552	0.0586972	1.67904	0.0931516	All	-0.0164892	0.2136	0.46321	0.664602	0.0883194	0.148292	0.321398	-0.0248139	1.67904	0.0931435	0.463169	C4
TNFRSF13C	0.188938	0.0787898	2.398	0.0164897	All	0.0345126	0.343363	0.21723	0.664602	0.118552	0.284287	0.516649	0.0519255	2.398	0.016485	0.217071	C4
TP53INP1	-0.0408577	0.0598868	-0.682249	0.495086	All	-0.158234	0.0765183	0.807745	0.664602	0.0901094	-0.061477	0.115137	-0.238091	-0.682249	0.495081	0.807737	C4
TPMT	-0.170826	0.137038	-1.24656	0.212565	All	-0.439415	0.0977627	0.616625	0.664602	0.206195	-0.257035	0.147107	-0.661178	-1.24656	0.212558	0.616577	C4
TSHB	0.142403	0.149196	0.954471	0.339851	All	-0.150015	0.434822	0.721865	0.664602	0.224489	0.214269	0.654267	-0.22573	0.954471	0.339845	0.721852	C4
UBAC1	-0.0386088	0.0649216	-0.5947	0.552048	All	-0.165853	0.0886351	0.837282	0.664602	0.0976849	-0.0580932	0.133369	-0.249556	-0.5947	0.552044	0.83727	C4
TYRO3	-0.0334535	0.0547029	-0.611548	0.54084	All	-0.140669	0.0737623	0.832119	0.664602	0.0823093	-0.0503361	0.11099	-0.211662	-0.611548	0.540837	0.832104	C4
TYMP	0.0572105	0.126808	0.451159	0.651877	All	-0.191328	0.305749	0.877067	0.664602	0.190803	0.0860823	0.460056	-0.287891	0.451159	0.651875	0.877064	C4
TXNRD1	-0.137484	0.0891521	-1.54213	0.12305	All	-0.312219	0.0372508	0.510021	0.664602	0.134144	-0.206867	0.0560547	-0.469789	-1.54213	0.123042	0.509957	C4
TXNDC5	0.0043566	0.131426	0.0331487	0.973556	All	-0.253233	0.261946	0.992587	0.664602	0.197751	0.0065552	0.394147	-0.381037	0.0331487	0.973556	0.992587	C4
TXNDC15	-0.192818	0.0522111	-3.69305	0.000221886	All	-0.29515	-0.0904865	0.0134142	0.664602	0.07856	-0.290126	-0.136149	-0.444104	-3.69305	0.000221578	0.0133955	C4
TXLNA	-0.286508	0.168392	-1.70143	0.0888701	All	-0.61655	0.0435348	0.454778	0.664602	0.253373	-0.431097	0.0655142	-0.927708	-1.70143	0.0888619	0.454736	C4
TST	-0.0292738	0.14025	-0.208725	0.834664	All	-0.30416	0.245612	0.952195	0.664602	0.211029	-0.0440472	0.36957	-0.457665	-0.208725	0.834663	0.952193	C4
TSPAN1	0.00623335	0.103557	0.0601927	0.952003	All	-0.196734	0.209201	0.984598	0.664602	0.155818	0.00937908	0.314782	-0.296023	0.0601927	0.952002	0.984598	C4
TSLP	-0.119626	0.113619	-1.05287	0.292407	All	-0.342314	0.103063	0.691607	0.664602	0.170957	-0.179996	0.15508	-0.515073	-1.05287	0.2924	0.691591	C4
TPP1	-0.231213	0.0888448	-2.60244	0.00925985	All	-0.405346	-0.0570807	0.162432	0.664602	0.133681	-0.347897	-0.0858823	-0.609913	-2.60244	0.00925628	0.162359	C4
TRIM5	-0.00470335	0.163357	-0.0287919	0.977031	All	-0.324877	0.31547	0.993534	0.664602	0.245796	-0.00707695	0.474684	-0.488838	-0.0287919	0.977031	0.993533	C4
TRIM21	-0.0320469	0.145695	-0.219959	0.825904	All	-0.317604	0.25351	0.948056	0.664602	0.219221	-0.0482197	0.381454	-0.477893	-0.219959	0.825903	0.948053	C4
TRIAP1	-0.0730822	0.121286	-0.602561	0.546805	All	-0.310798	0.164634	0.834399	0.664602	0.182494	-0.109964	0.247725	-0.467653	-0.602561	0.546801	0.834385	C4
TREML2	0.165595	0.0651484	2.54181	0.0110319	All	0.0379063	0.293283	0.178424	0.664602	0.0980262	0.249164	0.441295	0.0570326	2.54181	0.011028	0.178361	C4
TREM2	-0.0876713	0.102669	-0.853926	0.393151	All	-0.288898	0.113555	0.756944	0.664602	0.154481	-0.131916	0.170868	-0.434699	-0.853926	0.393146	0.756934	C4
TRAF2	-0.178182	0.133435	-1.33535	0.181769	All	-0.439709	0.0833447	0.582095	0.664602	0.200774	-0.268104	0.125413	-0.661621	-1.33535	0.181761	0.58204	C4
TPT1	0.0824099	0.123375	0.667963	0.504162	All	-0.159401	0.32422	0.8142	0.664602	0.185637	0.123999	0.487848	-0.239851	0.667963	0.504158	0.814194	C4
TPSAB1	0.25515	0.101639	2.51036	0.0120648	All	0.0559419	0.454358	0.187851	0.664602	0.152932	0.383914	0.68366	0.084168	2.51036	0.0120607	0.187787	C4
TPPP3	-0.0164837	0.0736332	-0.223862	0.822866	All	-0.160802	0.127835	0.946626	0.664602	0.110793	-0.0248024	0.192352	-0.241957	-0.223862	0.822865	0.946624	C4
ULBP2	0.0531373	0.0712075	0.746232	0.455532	All	-0.0864268	0.192701	0.790888	0.664602	0.107143	0.0799536	0.289954	-0.130047	0.746232	0.455527	0.79088	C4
GHRHR	-0.156463	0.103561	-1.51084	0.130838	All	-0.359438	0.0465118	0.519997	0.664602	0.155823	-0.235424	0.06999	-0.540838	-1.51084	0.13083	0.519914	C4
IL1RL1	-0.0257876	0.0900928	-0.286234	0.7747	All	-0.202366	0.150791	0.928186	0.664602	0.135559	-0.0388016	0.226894	-0.304497	-0.286234	0.774699	0.928182	C4
IL18	-0.147118	0.0888773	-1.65529	0.0978735	All	-0.321314	0.0270784	0.471259	0.664602	0.13373	-0.221362	0.0407486	-0.483473	-1.65529	0.0978653	0.471213	C4
IL18BP	0.0727611	0.0591523	1.23006	0.218681	All	-0.0431754	0.188698	0.622997	0.664602	0.0890042	0.109481	0.283929	-0.0649675	1.23006	0.218674	0.622975	C4
IL18R1	-0.13314	0.0672049	-1.98111	0.0475866	All	-0.264859	-0.00142083	0.351162	0.664602	0.10112	-0.20033	-0.00213423	-0.398527	-1.98111	0.0475794	0.351063	C4
IL18RAP	0.722354	0.326734	2.21083	0.0270534	All	0.0819671	1.36274	0.274193	0.664602	0.491624	1.0869	2.05048	0.123315	2.21083	0.0270475	0.274133	C4
IL19	0.0386594	0.131825	0.293263	0.769323	All	-0.219713	0.297032	0.925722	0.664602	0.198352	0.0581692	0.446939	-0.330601	0.293263	0.769321	0.92572	C4
IL1A	-0.0855447	0.107694	-0.79433	0.427008	All	-0.296621	0.125532	0.777962	0.664602	0.162043	-0.128716	0.188889	-0.44632	-0.79433	0.427003	0.777953	C4
IL1B	0.0569288	0.105974	0.537194	0.591137	All	-0.150777	0.264635	0.852568	0.664602	0.159456	0.0856585	0.398191	-0.226874	0.537194	0.591134	0.852563	C4
IL1R1	0.040679	0.0433061	0.939337	0.347564	All	-0.0441993	0.125557	0.727146	0.664602	0.0651609	0.0612081	0.188923	-0.0665074	0.939337	0.347558	0.727134	C4
IL1R2	-0.0742675	0.0371897	-1.99699	0.0458333	All	-0.147158	-0.00137699	0.347672	0.664602	0.0559579	-0.111747	-0.00206989	-0.221425	-1.99699	0.0458263	0.347571	C4
IL1RAP	0.113437	0.0873882	1.29809	0.194266	All	-0.0578404	0.284715	0.596893	0.664602	0.13149	0.170685	0.428404	-0.0870348	1.29809	0.194258	0.596868	C4
IL32	0.0577715	0.0816846	0.707251	0.479415	All	-0.102327	0.21787	0.800815	0.664602	0.122908	0.0869265	0.327825	-0.153972	0.707251	0.47941	0.800799	C4
IL1RL2	0.114755	0.0734812	1.5617	0.118368	All	-0.0292653	0.258776	0.503712	0.664602	0.110564	0.172668	0.389374	-0.0440383	1.5617	0.11836	0.503676	C4
IL1RN	-0.175882	0.118148	-1.48866	0.136586	All	-0.407447	0.0556839	0.525623	0.664602	0.177772	-0.264642	0.0837917	-0.613076	-1.48866	0.136578	0.525555	C4
IL2	0.0343934	0.0591251	0.581706	0.560768	All	-0.0814896	0.150276	0.839859	0.664602	0.0889632	0.0517504	0.226118	-0.122617	0.581706	0.560765	0.839854	C4
IL20	0.105177	0.0945729	1.11212	0.266092	All	-0.0801827	0.290536	0.667894	0.664602	0.1423	0.158255	0.437164	-0.120653	1.11212	0.266085	0.667862	C4
IL20RA	0.0620504	0.0848803	0.731034	0.464763	All	-0.104312	0.228413	0.794979	0.664602	0.127716	0.0933648	0.343688	-0.156959	0.731034	0.464758	0.79497	C4
IL22RA1	0.0048833	0.0810991	0.0602139	0.951986	All	-0.154068	0.163835	0.984598	0.664602	0.122027	0.0073477	0.24652	-0.231825	0.0602139	0.951985	0.984598	C4
IL24	-0.0110236	0.0908231	-0.121374	0.903395	All	-0.189033	0.166986	0.969773	0.664602	0.136658	-0.0165867	0.251263	-0.284436	-0.121374	0.903395	0.969772	C4
IL2RA	0.0918444	0.0781155	1.17575	0.239702	All	-0.0612593	0.244948	0.64534	0.664602	0.117537	0.138195	0.368568	-0.0921786	1.17575	0.239695	0.64532	C4
IL2RB	0.00685008	0.071039	0.096427	0.923182	All	-0.132384	0.146084	0.975947	0.664602	0.10689	0.010307	0.21981	-0.199196	0.096427	0.923181	0.975946	C4
IL17RB	0.446384	0.103132	4.32827	1.50668e-05	All	0.244248	0.648519	0.00203193	0.664602	0.155179	0.671656	0.975807	0.367505	4.32827	1.50286e-05	0.00202679	C4
IL17RA	0.0993905	0.0837376	1.18693	0.235264	All	-0.0647322	0.263513	0.639877	0.664602	0.125997	0.149549	0.396502	-0.0974045	1.18693	0.235256	0.639854	C4
IL12B	0.338705	0.109338	3.09776	0.00195128	All	0.124405	0.553004	0.0626275	0.664602	0.164517	0.509635	0.832089	0.187182	3.09776	0.00194986	0.0625128	C4
IGFBPL1	-0.071255	0.0659611	-1.08026	0.280034	All	-0.200536	0.0580263	0.682072	0.664602	0.099249	-0.107215	0.0873135	-0.301743	-1.08026	0.280027	0.682056	C4
IGSF3	-0.266604	0.0706301	-3.77465	0.000160475	All	-0.405036	-0.128171	0.0105594	0.664602	0.106274	-0.401148	-0.192851	-0.609446	-3.77465	0.000160232	0.0105298	C4
IGSF8	0.0161084	0.0590869	0.272621	0.785146	All	-0.0996999	0.131917	0.930878	0.664602	0.0889057	0.0242376	0.198493	-0.150018	0.272621	0.785144	0.930876	C4
IKBKG	-0.0693522	0.172844	-0.401242	0.688244	All	-0.408119	0.269415	0.890238	0.664602	0.260071	-0.104352	0.405388	-0.614091	-0.401242	0.688242	0.890235	C4
IKZF2	0.45453	0.174898	2.59883	0.00935776	All	0.111737	0.797324	0.163082	0.664602	0.263162	0.683914	1.19971	0.168116	2.59883	0.00935416	0.163019	C4
IL10	0.10317	0.154349	0.668421	0.503869	All	-0.199349	0.405689	0.814024	0.664602	0.232243	0.155236	0.610433	-0.29996	0.668421	0.503865	0.814009	C4
IL10RA	0.0631287	0.110804	0.569732	0.568863	All	-0.154044	0.280301	0.844101	0.664602	0.166723	0.0949873	0.421764	-0.231789	0.569732	0.56886	0.84409	C4
IL10RB	0.0092584	0.056698	0.163293	0.870288	All	-0.101868	0.120385	0.963008	0.664602	0.0853113	0.0139308	0.181141	-0.153279	0.163293	0.870288	0.963006	C4
IL11	0.139729	0.11938	1.17045	0.241825	All	-0.0942516	0.37371	0.647873	0.664602	0.179626	0.210245	0.562312	-0.141823	1.17045	0.241818	0.647853	C4
IL12A_IL12B	0.38182	0.153193	2.49241	0.0126921	All	0.0815672	0.682073	0.193831	0.664602	0.230504	0.57451	1.0263	0.122723	2.49241	0.0126879	0.193767	C4
IL17F	0.265155	0.145733	1.81946	0.0688492	All	-0.0204762	0.550787	0.411406	0.664602	0.219279	0.398969	0.828755	-0.0308176	1.81946	0.0688414	0.411298	C4
IL12RB1	0.0107529	0.071055	0.151332	0.879715	All	-0.128512	0.150018	0.964386	0.664602	0.106914	0.0161795	0.22573	-0.193371	0.151332	0.879714	0.964384	C4
IL13	-0.0436791	0.0940143	-0.4646	0.64222	All	-0.227944	0.140586	0.872957	0.664602	0.14146	-0.0657222	0.211539	-0.342983	-0.4646	0.642218	0.872954	C4
IL13RA1	-0.0584482	0.0430786	-1.35678	0.17486	All	-0.142881	0.0259844	0.572527	0.664602	0.0648187	-0.0879446	0.0391001	-0.214989	-1.35678	0.174852	0.572471	C4
IL15	-0.143875	0.0627941	-2.29121	0.0219565	All	-0.266949	-0.0208005	0.253543	0.664602	0.0944838	-0.216483	-0.0312943	-0.401671	-2.29121	0.0219511	0.253481	C4
IL15RA	0.0959316	0.0657575	1.45887	0.144609	All	-0.0329508	0.224814	0.533612	0.664602	0.0989427	0.144344	0.338272	-0.0495833	1.45887	0.144601	0.533582	C4
IL16	0.112306	0.0841516	1.33457	0.182026	All	-0.0526282	0.27724	0.582108	0.664602	0.12662	0.168982	0.417157	-0.0791922	1.33457	0.182018	0.582053	C4
IL17A	0.176952	0.0809406	2.18619	0.0288074	All	0.0183112	0.335593	0.281837	0.664602	0.121788	0.266253	0.504957	0.0275478	2.18619	0.0288014	0.281778	C4
IL17C	0.232324	0.132333	1.7556	0.0791644	All	-0.0270438	0.491691	0.43594	0.664602	0.199116	0.349568	0.739836	-0.040699	1.7556	0.0791564	0.435896	C4
IL17D	-0.0500587	0.0625745	-0.799985	0.423725	All	-0.172702	0.0725852	0.776415	0.664602	0.0941534	-0.0753213	0.109219	-0.259862	-0.799985	0.42372	0.776406	C4
IGFBP7	-0.0578805	0.0587228	-0.985656	0.324308	All	-0.172975	0.0572141	0.711789	0.664602	0.0883579	-0.0870904	0.0860909	-0.260272	-0.985656	0.324302	0.711775	C4
IL33	-0.0238653	0.0736452	-0.324058	0.745896	All	-0.168207	0.120477	0.915278	0.664602	0.110811	-0.0359092	0.18128	-0.253099	-0.324058	0.745894	0.915274	C4
ITGB6	-0.102493	0.0574758	-1.78323	0.0745568	All	-0.215143	0.0101579	0.425581	0.664602	0.0864816	-0.154216	0.0152874	-0.32372	-1.78323	0.0745489	0.425531	C4
ITGA11	0.0263587	0.0664281	0.396801	0.691517	All	-0.103838	0.156555	0.891315	0.664602	0.0999517	0.0396609	0.235566	-0.156244	0.396801	0.691514	0.891312	C4
ITGA5	-0.108819	0.0502862	-2.16399	0.0304714	All	-0.207378	-0.0102596	0.290656	0.664602	0.0756636	-0.163735	-0.0154345	-0.312036	-2.16399	0.0304653	0.290597	C4
ITGA6	-0.0070146	0.100137	-0.0700497	0.944154	All	-0.20328	0.189251	0.982952	0.664602	0.150673	-0.0105546	0.284764	-0.305873	-0.0700497	0.944154	0.982952	C4
ITGAM	0.00328659	0.0603717	0.0544392	0.956586	All	-0.11504	0.121613	0.985941	0.664602	0.090839	0.00494521	0.18299	-0.173099	0.0544392	0.956585	0.985941	C4
ITGAV	-0.00120893	0.0320386	-0.0377334	0.9699	All	-0.0640034	0.0615855	0.991731	0.664602	0.0482072	-0.00181902	0.0926671	-0.0963051	-0.0377334	0.9699	0.991731	C4
ITGB1	-0.0170111	0.0410524	-0.414375	0.678601	All	-0.0974723	0.0634501	0.888639	0.664602	0.0617699	-0.0255959	0.095473	-0.146665	-0.414375	0.678599	0.888633	C4
ITGB1BP1	0.111877	0.0766663	1.45927	0.144498	All	-0.038386	0.26214	0.533559	0.664602	0.115357	0.168337	0.394436	-0.0577621	1.45927	0.14449	0.533529	C4
ITGB1BP2	0.0397829	0.209361	0.190021	0.849294	All	-0.370557	0.450123	0.957052	0.664602	0.315017	0.0598598	0.677293	-0.557574	0.190021	0.849293	0.957051	C4
ITGB2	0.0526265	0.0543489	0.968309	0.332896	All	-0.0538954	0.159149	0.716992	0.664602	0.0817767	0.0791851	0.239467	-0.0810972	0.968309	0.33289	0.716963	C4
ITGB5	-0.0212945	0.0717393	-0.296832	0.766597	All	-0.161901	0.119312	0.923836	0.664602	0.107943	-0.032041	0.179528	-0.24361	-0.296832	0.766595	0.923835	C4
KDR	-0.0673208	0.0493166	-1.36508	0.172237	All	-0.16398	0.0293379	0.570179	0.664602	0.0742047	-0.101295	0.0441462	-0.246736	-1.36508	0.172229	0.570152	C4
ITGB7	-0.0562269	0.0888524	-0.632813	0.52686	All	-0.230374	0.117921	0.825314	0.664602	0.133693	-0.0846024	0.177435	-0.34664	-0.632813	0.526856	0.825307	C4
ITIH3	0.211064	0.0732786	2.88029	0.0039753	All	0.0674403	0.354687	0.0992807	0.664602	0.110259	0.317579	0.533688	0.101471	2.88029	0.00397309	0.0992255	C4
ITM2A	0.257256	0.114654	2.24375	0.0248544	All	0.032537	0.481974	0.267658	0.664602	0.172516	0.387082	0.725214	0.0489509	2.24375	0.0248487	0.267596	C4
IVD	0.00656892	0.0932117	0.0704731	0.943817	All	-0.176123	0.189261	0.982901	0.664602	0.140252	0.00988399	0.284778	-0.26501	0.0704731	0.943817	0.9829	C4
JAM2	0.143025	0.0503487	2.84069	0.00450397	All	0.0443435	0.241707	0.104833	0.664602	0.0757577	0.215204	0.363689	0.0667192	2.84069	0.00450159	0.104729	C4
JCHAIN	0.00676576	0.116526	0.0580623	0.953699	All	-0.221621	0.235152	0.985399	0.664602	0.175332	0.0101802	0.353831	-0.33347	0.0580623	0.953699	0.985399	C4
JUN	0.174971	0.0959871	1.82286	0.0683328	All	-0.0131605	0.363102	0.409394	0.664602	0.144428	0.263272	0.546351	-0.0198072	1.82286	0.068325	0.409339	C4
KAZALD1	0.0282675	0.0874326	0.323306	0.746465	All	-0.143097	0.199632	0.915433	0.664602	0.131556	0.042533	0.300383	-0.215317	0.323306	0.746463	0.91543	C4
KCNIP4	0.0010376	0.095076	0.0109134	0.991293	All	-0.185308	0.187383	0.997322	0.664602	0.143057	0.00156124	0.281953	-0.278831	0.0109134	0.991293	0.997322	C4
ISM1	-0.00141123	0.0762114	-0.0185173	0.985226	All	-0.150783	0.14796	0.995534	0.664602	0.114672	-0.00212342	0.222634	-0.226881	-0.0185173	0.985226	0.995534	C4
ISLR2	0.0805076	0.0702067	1.14672	0.251504	All	-0.0570951	0.21811	0.656648	0.664602	0.105637	0.121137	0.328186	-0.0859125	1.14672	0.251496	0.6566	C4
ILKAP	-0.0102685	0.109187	-0.0940447	0.925074	All	-0.224271	0.203734	0.975947	0.664602	0.164289	-0.0154505	0.306557	-0.337458	-0.0940447	0.925074	0.975946	C4
IL3RA	0.0695016	0.0596072	1.16599	0.243624	All	-0.0473263	0.186329	0.65016	0.664602	0.0896885	0.104576	0.280366	-0.0712133	1.16599	0.243617	0.650118	C4
IL4	0.00044424	0.171886	0.0025845	0.997938	All	-0.336446	0.337335	0.998735	0.664602	0.25863	0.000668431	0.507584	-0.506247	0.0025845	0.997938	0.998735	C4
IL4R	0.135845	0.0690763	1.9666	0.049237	All	0.000458135	0.271232	0.358184	0.664602	0.103936	0.204401	0.408116	0.000685594	1.9666	0.0492298	0.358131	C4
IL5	-0.114604	0.268352	-0.427067	0.669333	All	-0.640564	0.411355	0.882843	0.664602	0.403778	-0.17244	0.618965	-0.963845	-0.427067	0.66933	0.882839	C4
IL5RA	0.00656608	0.105502	0.0622364	0.950375	All	-0.200214	0.213347	0.984401	0.664602	0.158745	0.00987972	0.32102	-0.30126	0.0622364	0.950375	0.984401	C4
IL6	-0.134654	0.147956	-0.910094	0.362779	All	-0.424643	0.155335	0.737893	0.664602	0.222624	-0.202609	0.233734	-0.638951	-0.910094	0.362773	0.737881	C4
IL6R	-0.000178716	0.0652598	-0.00273853	0.997815	All	-0.128085	0.127728	0.998735	0.664602	0.0981938	-0.000268907	0.192191	-0.192729	-0.00273853	0.997815	0.998735	C4
IL6ST	-0.0031361	0.0333217	-0.0941157	0.925018	All	-0.0684455	0.0621733	0.975947	0.664602	0.0501379	-0.00471876	0.0935515	-0.102989	-0.0941157	0.925017	0.975946	C4
IL7	-0.0510677	0.123519	-0.413441	0.679286	All	-0.29316	0.191025	0.88899	0.664602	0.185854	-0.0768396	0.287434	-0.441113	-0.413441	0.679284	0.888986	C4
IL7R	0.116224	0.103829	1.11938	0.262986	All	-0.0872774	0.319726	0.664361	0.664602	0.156228	0.174878	0.481085	-0.131328	1.11938	0.262979	0.664343	C4
IRAK4	-0.115955	0.197796	-0.586233	0.557722	All	-0.503628	0.271718	0.838548	0.664602	0.297616	-0.174472	0.408855	-0.757799	-0.586233	0.557719	0.838537	C4
IMPA1	0.00802825	0.115755	0.0693557	0.944707	All	-0.218847	0.234903	0.983079	0.664602	0.174172	0.0120798	0.353456	-0.329296	0.0693557	0.944706	0.983078	C4
ING1	-0.0294498	0.0887965	-0.331656	0.740151	All	-0.203488	0.144588	0.912541	0.664602	0.133609	-0.044312	0.217561	-0.306185	-0.331656	0.740149	0.912539	C4
INHBC	-0.326071	0.0871209	-3.74274	0.000182291	All	-0.496825	-0.155317	0.0114961	0.664602	0.131087	-0.490626	-0.233695	-0.747557	-3.74274	0.000182024	0.0114793	C4
INPP1	-0.00536633	0.102593	-0.0523068	0.958284	All	-0.206445	0.195713	0.986965	0.664602	0.154368	-0.0080745	0.294487	-0.310636	-0.0523068	0.958284	0.986965	C4
INPPL1	-0.221034	0.184099	-1.20062	0.229904	All	-0.581861	0.139794	0.632959	0.664602	0.277006	-0.332581	0.210352	-0.875513	-1.20062	0.229897	0.632938	C4
IPCEF1	-0.254705	0.169996	-1.49829	0.134065	All	-0.587892	0.0784821	0.521853	0.664602	0.255787	-0.383244	0.118098	-0.884587	-1.49829	0.134057	0.521821	C4
IQGAP2	-0.0804968	0.104226	-0.772332	0.439922	All	-0.284775	0.123782	0.784132	0.664602	0.156824	-0.12112	0.186255	-0.428496	-0.772332	0.439918	0.784123	C4
IRAG2	0.321459	0.168216	1.91099	0.0560134	All	-0.00823827	0.651156	0.380494	0.664602	0.253108	0.483686	0.979777	-0.0124049	1.91099	0.0560059	0.380398	C4
IRAK1	0.0225242	0.129764	0.173578	0.862198	All	-0.231809	0.276858	0.960577	0.664602	0.195251	0.0338913	0.416584	-0.348801	0.173578	0.862197	0.960575	C4
IL34	-0.00499593	0.0679667	-0.0735055	0.941404	All	-0.138208	0.128216	0.982189	0.664602	0.102267	-0.00751718	0.192926	-0.20796	-0.0735055	0.941404	0.982188	C4
GZMH	0.145137	0.145283	0.998996	0.317803	All	-0.139612	0.429887	0.707493	0.664602	0.218602	0.218382	0.646841	-0.210077	0.998996	0.317797	0.707463	C4
GRPEL1	-0.236222	0.115401	-2.04697	0.040668	All	-0.462405	-0.0100404	0.330526	0.664602	0.17364	-0.355435	-0.0151012	-0.695768	-2.04697	0.0406612	0.330386	C4
GSAP	0.122775	0.161311	0.761108	0.446597	All	-0.193389	0.43894	0.787154	0.664602	0.242719	0.184735	0.660464	-0.290994	0.761108	0.446593	0.787139	C4
GSTA1	-0.884306	0.172703	-5.12037	3.06419e-07	All	-1.2228	-0.545813	8.66473e-05	0.664602	0.25986	-1.33058	-0.821254	-1.83991	-5.12037	3.04939e-07	8.6229e-05	C4
GSTA3	-0.584492	0.151537	-3.85708	0.000114935	All	-0.8815	-0.287485	0.00845714	0.664602	0.228012	-0.879462	-0.432558	-1.32637	-3.85708	0.000114747	0.00844331	C4
GSTP1	0.427923	0.129702	3.29928	0.000970219	All	0.173712	0.682135	0.0377997	0.664602	0.195158	0.643879	1.02639	0.261371	3.29928	0.000969332	0.0377652	C4
GUCA2A	0.0145126	0.0641896	0.226089	0.821133	All	-0.111297	0.140322	0.946117	0.664602	0.0965836	0.0218365	0.21114	-0.167467	0.226089	0.821132	0.946115	C4
GUSB	-0.661605	0.124672	-5.30678	1.122e-07	All	-0.905957	-0.417253	4.27628e-05	0.664602	0.187589	-0.995491	-0.627818	-1.36316	-5.30678	1.11578e-07	4.25258e-05	C4
GYS1	0.226689	0.173057	1.3099	0.190236	All	-0.112498	0.565875	0.590932	0.664602	0.260393	0.341089	0.851459	-0.16928	1.3099	0.190228	0.590908	C4
GZMA	0.0401736	0.067316	0.596792	0.55065	All	-0.0917632	0.17211	0.836676	0.664602	0.101288	0.0604477	0.258971	-0.138076	0.596792	0.550646	0.83667	C4
GZMB	0.275406	0.124574	2.21079	0.0270564	All	0.031246	0.519565	0.274193	0.664602	0.187441	0.414392	0.781776	0.0470079	2.21079	0.0270505	0.274133	C4
HEBP1	0.12437	0.101501	1.22531	0.220466	All	-0.0745678	0.323307	0.624805	0.664602	0.152724	0.187134	0.486473	-0.112205	1.22531	0.220458	0.624758	C4
HAGH	-0.0817374	0.136407	-0.599217	0.549032	All	-0.34909	0.185616	0.836284	0.664602	0.205246	-0.122987	0.279296	-0.52527	-0.599217	0.549028	0.836279	C4
HAO1	-1.18859	0.250551	-4.74389	2.10405e-06	All	-1.67966	-0.697518	0.000392427	0.664602	0.376995	-1.78842	-1.04951	-2.52733	-4.74389	2.09648e-06	0.000391017	C4
HARS1	-0.112179	0.147331	-0.761412	0.446416	All	-0.400942	0.176583	0.787154	0.664602	0.221682	-0.168792	0.265706	-0.603289	-0.761412	0.446411	0.787139	C4
HAVCR1	-0.432134	0.123377	-3.50255	0.00046136	All	-0.673949	-0.190319	0.0237899	0.664602	0.185641	-0.650215	-0.286359	-1.01407	-3.50255	0.000460834	0.0237628	C4
HAVCR2	0.0231023	0.0686322	0.33661	0.736413	All	-0.111414	0.157619	0.911908	0.664602	0.103268	0.0347611	0.237167	-0.167645	0.33661	0.736411	0.911906	C4
HBEGF	-0.0937174	0.14116	-0.663911	0.506751	All	-0.370385	0.18295	0.815977	0.664602	0.212397	-0.141013	0.275286	-0.557312	-0.663911	0.506747	0.815971	C4
HBQ1	0.029987	0.11595	0.25862	0.79593	All	-0.197271	0.257245	0.936463	0.664602	0.174465	0.0451203	0.387073	-0.296832	0.25862	0.795928	0.936461	C4
HCLS1	-0.0317751	0.106812	-0.297487	0.766096	All	-0.241123	0.177572	0.923836	0.664602	0.160716	-0.0478108	0.267192	-0.362813	-0.297487	0.766095	0.923835	C4
HDGF	0.0928742	0.180891	0.513427	0.607656	All	-0.261665	0.447414	0.859339	0.664602	0.272179	0.139744	0.673216	-0.393727	0.513427	0.607653	0.859331	C4
GRN	-0.0265118	0.0469524	-0.564653	0.572313	All	-0.118537	0.0655132	0.844895	0.664602	0.0706474	-0.0398913	0.0985776	-0.17836	-0.564653	0.57231	0.844885	C4
GRK5	0.0742398	0.0969295	0.765916	0.443731	All	-0.115738	0.264218	0.786443	0.664602	0.145846	0.111706	0.397564	-0.174152	0.765916	0.443726	0.786434	C4
GOPC	-0.053837	0.192399	-0.27982	0.779617	All	-0.430932	0.323258	0.929279	0.664602	0.289495	-0.0810064	0.486404	-0.648416	-0.27982	0.779616	0.929275	C4
GKN1	0.0173839	0.0513014	0.338858	0.734719	All	-0.083165	0.117933	0.91139	0.664602	0.0771912	0.0261568	0.177452	-0.125138	0.338858	0.734717	0.911385	C4
GLB1	-0.336733	0.0805193	-4.18202	2.89574e-05	All	-0.494548	-0.178918	0.00317301	0.664602	0.121154	-0.506669	-0.269207	-0.744131	-4.18202	2.8893e-05	0.00316595	C4
GLO1	-0.139414	0.110467	-1.26204	0.206942	All	-0.355925	0.0770976	0.611397	0.664602	0.166215	-0.20977	0.116012	-0.535552	-1.26204	0.206934	0.61137	C4
GLOD4	-0.0181905	0.0677636	-0.268441	0.788361	All	-0.151005	0.114624	0.932449	0.664602	0.101961	-0.0273705	0.172473	-0.227214	-0.268441	0.78836	0.932447	C4
GLRX	-0.0786562	0.1088	-0.722944	0.469718	All	-0.2919	0.134587	0.797248	0.664602	0.163707	-0.118351	0.202514	-0.439216	-0.722944	0.469714	0.797232	C4
GLT8D2	-0.0946751	0.0882946	-1.07226	0.283608	All	-0.267729	0.0783791	0.684966	0.664602	0.132853	-0.142454	0.117939	-0.402847	-1.07226	0.283602	0.684935	C4
GMPR	-0.0933653	0.0954242	-0.978424	0.327871	All	-0.280393	0.0936626	0.71468	0.664602	0.143581	-0.140483	0.140936	-0.421902	-0.978424	0.327865	0.714651	C4
GNE	-0.0605677	0.121853	-0.497054	0.619154	All	-0.299396	0.17826	0.862474	0.664602	0.183348	-0.0911338	0.268228	-0.450495	-0.497054	0.619151	0.862464	C4
GNLY	0.0124453	0.10022	0.12418	0.901173	All	-0.183982	0.208873	0.968811	0.664602	0.150797	0.0187259	0.314288	-0.276836	0.12418	0.901173	0.968811	C4
GOLM2	-0.0734189	0.0450698	-1.629	0.10332	All	-0.161754	0.0149163	0.482528	0.664602	0.0678148	-0.110471	0.0224464	-0.243388	-1.629	0.103312	0.48249	C4
GRAP2	-0.150538	0.244929	-0.614618	0.538811	All	-0.630589	0.329514	0.830795	0.664602	0.368535	-0.226508	0.49582	-0.948836	-0.614618	0.538807	0.830789	C4
GP1BA	0.00583593	0.0619246	0.0942424	0.924917	All	-0.115534	0.127206	0.975947	0.664602	0.0931755	0.00878109	0.191405	-0.173843	0.0942424	0.924917	0.975946	C4
GP2	-0.491233	0.160006	-3.07008	0.00214148	All	-0.804839	-0.177626	0.066333	0.664602	0.240755	-0.739139	-0.267259	-1.21102	-3.07008	0.00213998	0.0662822	C4
GP6	0.0214492	0.167973	0.127695	0.898391	All	-0.307771	0.350669	0.9676	0.664602	0.252742	0.0322738	0.527647	-0.4631	0.127695	0.89839	0.967599	C4
GPA33	-0.138298	0.259589	-0.532756	0.594205	All	-0.647082	0.370487	0.853965	0.664602	0.390593	-0.208091	0.557471	-0.973653	-0.532756	0.594202	0.853957	C4
GPC1	0.0217245	0.0567188	0.383021	0.701706	All	-0.0894423	0.132891	0.895235	0.664602	0.0853426	0.032688	0.199959	-0.134583	0.383021	0.701704	0.895232	C4
GPC5	0.0086367	0.106472	0.0811173	0.935349	All	-0.200044	0.217318	0.97936	0.664602	0.160204	0.0129953	0.326995	-0.301004	0.0811173	0.935349	0.979359	C4
GPKOW	-0.131609	0.056462	-2.33093	0.0197624	All	-0.242272	-0.0209453	0.239941	0.664602	0.0849561	-0.198026	-0.0315125	-0.36454	-2.33093	0.0197572	0.239878	C4
GPNMB	-0.00406835	0.053487	-0.0760623	0.93937	All	-0.108901	0.100764	0.981468	0.664602	0.0804798	-0.00612148	0.151619	-0.163862	-0.0760623	0.93937	0.981468	C4
GPR37	-0.119924	0.125704	-0.954021	0.340079	All	-0.366299	0.126451	0.721999	0.664602	0.189141	-0.180445	0.190272	-0.551162	-0.954021	0.340073	0.721986	C4
GHRL	-0.266398	0.158478	-1.68098	0.0927747	All	-0.577009	0.0442126	0.463134	0.664602	0.238455	-0.400839	0.0665335	-0.868212	-1.68098	0.0927665	0.463064	C4
HEXIM1	-0.159987	0.154772	-1.03369	0.301286	All	-0.463335	0.143361	0.695386	0.664602	0.23288	-0.240726	0.215718	-0.69717	-1.03369	0.30128	0.695371	C4
IFNGR1	0.0998834	0.0395963	2.52254	0.011655	All	0.0222761	0.177491	0.183096	0.664602	0.059579	0.150291	0.267066	0.0335158	2.52254	0.0116509	0.183033	C4
ICAM1	-0.145983	0.0571231	-2.55558	0.0106051	All	-0.257942	-0.0340232	0.17409	0.664602	0.0859509	-0.219654	-0.0511903	-0.388118	-2.55558	0.0106012	0.174014	C4
ICAM2	0.0756798	0.0619432	1.22176	0.221806	All	-0.0457267	0.197086	0.625297	0.664602	0.0932035	0.113872	0.296551	-0.0688065	1.22176	0.221798	0.625272	C4
ICAM3	-0.000336782	0.0501648	-0.00671352	0.994643	All	-0.098658	0.0979844	0.998735	0.664602	0.075481	-0.000506743	0.147436	-0.148449	-0.00671352	0.994643	0.998735	C4
ICAM4	0.117983	0.101689	1.16023	0.245961	All	-0.0813237	0.317289	0.651739	0.664602	0.153007	0.177524	0.477418	-0.12237	1.16023	0.245954	0.651717	C4
ICAM5	-0.0702881	0.0887327	-0.792133	0.428288	All	-0.244201	0.103625	0.778256	0.664602	0.133513	-0.10576	0.155925	-0.367445	-0.792133	0.428283	0.778236	C4
ICOSLG	0.0835884	0.0366777	2.279	0.0226728	All	0.0117014	0.155475	0.254166	0.664602	0.0551875	0.125772	0.23394	0.0176046	2.279	0.0226673	0.254094	C4
IDI2	-0.0786639	0.0902867	-0.871268	0.383613	All	-0.255623	0.0982948	0.752813	0.664602	0.135851	-0.118362	0.147905	-0.38463	-0.871268	0.383608	0.7528	C4
IDS	0.011567	0.0170522	0.678332	0.497565	All	-0.0218546	0.0449887	0.809185	0.664602	0.0256577	0.0174045	0.0676937	-0.0328847	0.678332	0.497561	0.809168	C4
IDUA	-0.274677	0.0903046	-3.04167	0.00235429	All	-0.451671	-0.097683	0.069722	0.664602	0.135878	-0.413295	-0.146975	-0.679616	-3.04167	0.0023527	0.0696748	C4
IFNG	-0.0292105	0.214569	-0.136135	0.891715	All	-0.449759	0.391338	0.966346	0.664602	0.322854	-0.0439518	0.588842	-0.676746	-0.136135	0.891714	0.966345	C4
IGFBP6	0.0715527	0.0576752	1.24061	0.214756	All	-0.0414887	0.184594	0.618575	0.664602	0.0867816	0.107662	0.277754	-0.0624295	1.24061	0.214748	0.618528	C4
IFNGR2	-0.0428773	0.09947	-0.431057	0.666429	All	-0.237835	0.15208	0.882468	0.664602	0.149669	-0.0645158	0.228835	-0.357866	-0.431057	0.666427	0.882462	C4
IFNL1	0.00876804	0.0847747	0.103428	0.917624	All	-0.157387	0.174923	0.974395	0.664602	0.127557	0.0131929	0.263205	-0.236819	0.103428	0.917624	0.974394	C4
IFNLR1	-0.0114021	0.0723156	-0.157671	0.874717	All	-0.153138	0.130334	0.964014	0.664602	0.10881	-0.0171563	0.196112	-0.230425	-0.157671	0.874716	0.964013	C4
IGF1R	0.0244048	0.0408854	0.596908	0.550572	All	-0.0557291	0.104539	0.836676	0.664602	0.0615186	0.036721	0.157298	-0.0838556	0.596908	0.550569	0.83667	C4
IGF2R	-0.118804	0.0458619	-2.59047	0.00958814	All	-0.208692	-0.0289162	0.165452	0.664602	0.0690066	-0.17876	-0.0435066	-0.314013	-2.59047	0.0095845	0.165389	C4
IGFBP1	0.91028	0.257071	3.54097	0.00039914	All	0.40643	1.41413	0.0210775	0.664602	0.386805	1.36966	2.1278	0.611525	3.54097	0.000398665	0.0210524	C4
IGFBP2	0.765015	0.132421	5.77716	7.6563e-09	All	0.505475	1.02455	4.1947e-06	0.664602	0.199248	1.15109	1.54161	0.760561	5.77716	7.59739e-09	4.16242e-06	C4
IGFBP3	-0.217904	0.0565205	-3.85531	0.000115772	All	-0.328682	-0.107126	0.00845714	0.664602	0.0850442	-0.327872	-0.161185	-0.494558	-3.85531	0.000115583	0.00844331	C4
IGFBP4	-0.0104217	0.0838733	-0.124256	0.901113	All	-0.17481	0.153967	0.968811	0.664602	0.126201	-0.0156812	0.231672	-0.263035	-0.124256	0.901113	0.968811	C4
ICA1	-0.042004	0.148392	-0.28306	0.777132	All	-0.332847	0.24884	0.928598	0.664602	0.22328	-0.0632017	0.374427	-0.50083	-0.28306	0.777131	0.928594	C4
HYOU1	0.0915499	0.0429227	2.1329	0.032939	All	0.00742301	0.175677	0.304904	0.664602	0.0645841	0.137752	0.264336	0.0111668	2.1329	0.0329327	0.304845	C4
HPGDS	-0.0627531	0.0704613	-0.890604	0.373147	All	-0.200855	0.0753485	0.746976	0.664602	0.10602	-0.0944222	0.113378	-0.302222	-0.890604	0.373141	0.746965	C4
HGS	-0.241578	0.145021	-1.66581	0.0957591	All	-0.525815	0.0426584	0.46693	0.664602	0.218208	-0.363493	0.0641942	-0.791181	-1.66581	0.0957509	0.466829	C4
HK2	0.0148122	0.0525941	0.281632	0.778228	All	-0.0882704	0.117895	0.928787	0.664602	0.0791362	0.0222873	0.177394	-0.13282	0.281632	0.778226	0.928786	C4
HLA-DRA	0.0294829	0.0691674	0.426255	0.669925	All	-0.106083	0.165049	0.883297	0.664602	0.104073	0.0443618	0.248346	-0.159622	0.426255	0.669922	0.88329	C4
HLA-E	0.0510113	0.0550655	0.926376	0.354256	All	-0.056915	0.158938	0.733285	0.664602	0.0828548	0.0767547	0.23915	-0.0856407	0.926376	0.35425	0.733262	C4
HMBS	-0.0931224	0.0820309	-1.13521	0.256294	All	-0.2539	0.0676553	0.660472	0.664602	0.123429	-0.140118	0.101803	-0.382038	-1.13521	0.256287	0.660447	C4
HMOX1	-0.141183	0.0905172	-1.55973	0.118831	All	-0.318593	0.0362278	0.503712	0.664602	0.136198	-0.212432	0.0545155	-0.479379	-1.55973	0.118823	0.503676	C4
HMOX2	-0.0626844	0.0880622	-0.711819	0.476581	All	-0.235283	0.109914	0.799988	0.664602	0.132504	-0.0943187	0.165389	-0.354026	-0.711819	0.476577	0.79998	C4
HNMT	-0.194421	0.0945559	-2.05615	0.039775	All	-0.379747	-0.00909475	0.327661	0.664602	0.142274	-0.292537	-0.0136794	-0.571395	-2.05615	0.0397683	0.327586	C4
HNRNPK	-0.0409544	0.146758	-0.27906	0.7802	All	-0.328596	0.246687	0.929279	0.664602	0.220822	-0.0616225	0.371188	-0.494433	-0.27906	0.780199	0.929275	C4
HPCAL1	0.00700509	0.141939	0.0493528	0.960638	All	-0.271191	0.285201	0.988259	0.664602	0.21357	0.0105403	0.429138	-0.408058	0.0493528	0.960638	0.988259	C4
HYAL1	0.0118669	0.0436471	0.271882	0.785714	All	-0.0736798	0.0974136	0.930878	0.664602	0.065674	0.0178556	0.146577	-0.110865	0.271882	0.785712	0.930876	C4
HS3ST3B1	-0.125697	0.0720583	-1.74438	0.0811012	All	-0.266929	0.0155348	0.439275	0.664602	0.108423	-0.189131	0.0233784	-0.401641	-1.74438	0.0810932	0.439181	C4
HS6ST1	-0.0606793	0.0655166	-0.926166	0.354365	All	-0.189089	0.0677309	0.733285	0.664602	0.0985802	-0.0913017	0.101916	-0.284519	-0.926166	0.35436	0.733262	C4
HSD11B1	0.0237293	0.0791177	0.299924	0.764237	All	-0.131338	0.178797	0.922484	0.664602	0.119045	0.0357045	0.269033	-0.197624	0.299924	0.764235	0.92248	C4
HSP90B1	0.234126	0.126359	1.85286	0.0639096	All	-0.0135331	0.481785	0.400166	0.664602	0.190127	0.35228	0.724929	-0.0203696	1.85286	0.0639019	0.400117	C4
HSPA1A	0.0361927	0.13732	0.263566	0.792116	All	-0.232949	0.305334	0.934831	0.664602	0.206619	0.0544578	0.459432	-0.350516	0.263566	0.792115	0.934827	C4
HSPB1	0.0322958	0.129976	0.248475	0.803768	All	-0.222452	0.287044	0.939444	0.664602	0.195569	0.0485942	0.43191	-0.334722	0.248475	0.803767	0.939443	C4
HSPB6	-0.0567234	0.0758884	-0.747458	0.454791	All	-0.205462	0.092015	0.790137	0.664602	0.114186	-0.0853494	0.138456	-0.309154	-0.747458	0.454787	0.790129	C4
HSPG2	0.0266278	0.0517495	0.514551	0.606869	All	-0.0747994	0.128055	0.859339	0.664602	0.0778655	0.0400658	0.192682	-0.112551	0.514551	0.606866	0.859331	C4
HTRA2	-0.00245551	0.117033	-0.0209813	0.983261	All	-0.231836	0.226925	0.994981	0.664602	0.176095	-0.00369471	0.341452	-0.348841	-0.0209813	0.983261	0.994981	C4
HGF	-0.223034	0.0735884	-3.03083	0.00244048	All	-0.367264	-0.0788031	0.0717866	0.664602	0.110726	-0.33559	-0.118568	-0.552612	-3.03083	0.00243885	0.0716828	C4
PRDX6	0.172596	0.115423	1.49534	0.134834	All	-0.0536282	0.398821	0.523684	0.664602	0.173672	0.259699	0.600097	-0.0806985	1.49534	0.134826	0.523652	C4
CCL26	0.0998907	0.173122	0.576997	0.563945	All	-0.239421	0.439203	0.842286	0.664602	0.260489	0.150302	0.660861	-0.360257	0.576997	0.563941	0.842273	C4
CCN3	-0.00339359	0.066088	-0.0513496	0.959047	All	-0.132924	0.126137	0.987086	0.664602	0.09944	-0.0051062	0.189796	-0.200009	-0.0513496	0.959047	0.987085	C4
CCN2	0.012848	0.109775	0.11704	0.906829	All	-0.202307	0.228003	0.970613	0.664602	0.165174	0.0193319	0.343073	-0.304409	0.11704	0.906829	0.970612	C4
CCN1	-0.425569	0.142996	-2.97609	0.00292134	All	-0.705836	-0.145302	0.0811104	0.664602	0.215161	-0.640337	-0.218622	-1.06205	-2.97609	0.00291952	0.0810514	C4
CCL8	0.0978531	0.116897	0.837087	0.402549	All	-0.131261	0.326967	0.762477	0.664602	0.175891	0.147236	0.491981	-0.19751	0.837087	0.402544	0.762467	C4
CCL7	-0.183422	0.114052	-1.60823	0.107794	All	-0.40696	0.0401165	0.488837	0.664602	0.17161	-0.275987	0.060368	-0.612342	-1.60823	0.107786	0.4888	C4
CCL5	-0.0639714	0.194594	-0.328742	0.742352	All	-0.445369	0.317427	0.913328	0.664602	0.292799	-0.0962553	0.47763	-0.67014	-0.328742	0.74235	0.913325	C4
CCL4	-0.148045	0.125901	-1.17588	0.239651	All	-0.394807	0.0987174	0.64534	0.664602	0.189439	-0.222757	0.148543	-0.594057	-1.17588	0.239643	0.64532	C4
CCL3	-0.255567	0.103306	-2.4739	0.0133691	All	-0.458042	-0.0530921	0.198755	0.664602	0.15544	-0.384542	-0.07988	-0.689204	-2.4739	0.0133648	0.198616	C4
CCL28	-0.31266	0.111603	-2.80153	0.00508858	All	-0.531398	-0.0939219	0.11467	0.664602	0.167925	-0.470447	-0.141314	-0.79958	-2.80153	0.00508603	0.114612	C4
CCL27	-0.168565	0.115996	-1.4532	0.146176	All	-0.395912	0.0587823	0.535008	0.664602	0.174534	-0.253633	0.0884537	-0.595719	-1.4532	0.146168	0.534951	C4
CCL17	0.0423017	0.176004	0.240346	0.810064	All	-0.302659	0.387262	0.942655	0.664602	0.264826	0.0636497	0.582708	-0.455409	0.240346	0.810062	0.942653	C4
CCL25	0.0427993	0.0949564	0.450725	0.65219	All	-0.143312	0.22891	0.877067	0.664602	0.142877	0.0643984	0.344438	-0.215641	0.450725	0.652188	0.877064	C4
CCL24	-0.179628	0.160385	-1.11998	0.262731	All	-0.493977	0.134722	0.664338	0.664602	0.241325	-0.270279	0.202719	-0.743276	-1.11998	0.262724	0.6643	C4
CCL23	-0.0182235	0.079166	-0.230193	0.817943	All	-0.173386	0.136939	0.945376	0.664602	0.119118	-0.0274201	0.206051	-0.260891	-0.230193	0.817942	0.945375	C4
CCL22	-0.086482	0.101752	-0.849929	0.39537	All	-0.285912	0.112948	0.758475	0.664602	0.153102	-0.130126	0.169954	-0.430206	-0.849929	0.395365	0.758453	C4
CCL21	-0.0526128	0.0788104	-0.667587	0.504401	All	-0.207078	0.101853	0.814438	0.664602	0.118583	-0.0791644	0.153258	-0.311587	-0.667587	0.504397	0.814431	C4
CCL20	-0.269063	0.17177	-1.56641	0.11726	All	-0.605725	0.0676003	0.501995	0.664602	0.258455	-0.404848	0.101725	-0.91142	-1.56641	0.117252	0.501954	C4
CCL2	-0.137874	0.0975268	-1.4137	0.157458	All	-0.329023	0.0532752	0.551918	0.664602	0.146745	-0.207453	0.0801663	-0.495073	-1.4137	0.157449	0.551865	C4
CCL19	0.120264	0.236975	0.507497	0.611809	All	-0.344199	0.584727	0.860809	0.664602	0.356567	0.180957	0.879829	-0.517915	0.507497	0.611806	0.860798	C4
CCL18	-0.011615	0.135768	-0.0855505	0.931824	All	-0.277716	0.254485	0.978153	0.664602	0.204285	-0.0174767	0.382922	-0.417875	-0.0855505	0.931824	0.978152	C4
CCN4	-0.151151	0.0775834	-1.94824	0.051394	All	-0.303211	0.000909903	0.365089	0.664602	0.116737	-0.227431	0.0013733	-0.456234	-1.94824	0.0513867	0.365037	C4
CCN5	0.10368	0.0765756	1.35396	0.175757	All	-0.0464051	0.253766	0.572527	0.664602	0.11522	0.156004	0.381835	-0.069828	1.35396	0.175749	0.572471	C4
CD200R1	0.0463905	0.0662535	0.700197	0.483809	All	-0.0834639	0.176245	0.802776	0.664602	0.099689	0.0698019	0.265192	-0.125588	0.700197	0.483804	0.802769	C4
CD300C	0.0535018	0.0666656	0.80254	0.422245	All	-0.0771603	0.184164	0.775163	0.664602	0.100309	0.0805021	0.277108	-0.116104	0.80254	0.42224	0.775154	C4
CD2AP	-0.117776	0.121922	-0.96599	0.334055	All	-0.35674	0.121188	0.718208	0.664602	0.183452	-0.177213	0.182353	-0.536779	-0.96599	0.334049	0.718174	C4
CD28	0.105422	0.0693226	1.52075	0.128331	All	-0.0304476	0.241292	0.514816	0.664602	0.104307	0.158625	0.363066	-0.045817	1.52075	0.128323	0.514744	C4
CD276	0.157658	0.0680934	2.31531	0.020601	All	0.0241971	0.291118	0.243933	0.664602	0.102457	0.237221	0.438038	0.0364047	2.31531	0.0205957	0.243869	C4
CD274	-0.102738	0.0645339	-1.59201	0.111391	All	-0.229222	0.0237456	0.494641	0.664602	0.0971016	-0.154586	0.0357326	-0.344906	-1.59201	0.111383	0.494548	C4
CD27	0.266709	0.0789192	3.37953	0.000726831	All	0.112031	0.421388	0.0316985	0.664602	0.118747	0.401307	0.63405	0.168564	3.37953	0.000726105	0.0316669	C4
CD244	0.0662674	0.0524911	1.26245	0.206794	All	-0.0366132	0.169148	0.611385	0.664602	0.0789812	0.09971	0.254513	-0.0550932	1.26245	0.206786	0.611362	C4
CD22	0.267914	0.0824257	3.25037	0.00115353	All	0.106363	0.429466	0.0426659	0.664602	0.124023	0.40312	0.646204	0.160036	3.25037	0.00115253	0.042629	C4
CD209	0.0705785	0.0734079	0.961456	0.336329	All	-0.0732984	0.214455	0.720351	0.664602	0.110454	0.106197	0.322687	-0.110293	0.961456	0.336323	0.720327	C4
CD207	0.0121862	0.0731258	0.166648	0.867648	All	-0.131138	0.15551	0.96269	0.664602	0.110029	0.0183362	0.233994	-0.197322	0.166648	0.867647	0.962689	C4
CCS	0.0436335	0.0899313	0.485187	0.627547	All	-0.132629	0.219896	0.866005	0.664602	0.135316	0.0656536	0.330873	-0.199566	0.485187	0.627544	0.865998	C4
CD200	0.122041	0.050744	2.40503	0.0161757	All	0.0225846	0.221497	0.216068	0.664602	0.0763525	0.18363	0.333281	0.0339795	2.40503	0.0161709	0.21595	C4
CD1C	0.051888	0.0466281	1.1128	0.265799	All	-0.0395015	0.143278	0.667894	0.664602	0.0701595	0.0780738	0.215587	-0.0594389	1.1128	0.265792	0.667862	C4
CD177	0.101567	0.247722	0.410004	0.681805	All	-0.383959	0.587093	0.888996	0.664602	0.372737	0.152824	0.883389	-0.577741	0.410004	0.681803	0.888993	C4
CD164	-0.0367118	0.051602	-0.711442	0.476815	All	-0.13785	0.0644262	0.799994	0.664602	0.0776434	-0.0552388	0.0969423	-0.20742	-0.711442	0.47681	0.799987	C4
CD163	-0.187967	0.0852897	-2.20386	0.0275401	All	-0.355131	-0.0208019	0.277172	0.664602	0.128332	-0.282826	-0.0312951	-0.534357	-2.20386	0.0275342	0.277092	C4
CD160	0.312643	0.0904078	3.45814	0.000544511	All	0.135447	0.489839	0.0263712	0.664602	0.136033	0.470421	0.737046	0.203796	3.45814	0.000543919	0.0263425	C4
CD14	0.0676027	0.0776034	0.87113	0.383689	All	-0.0844973	0.219703	0.752813	0.664602	0.116767	0.101719	0.330582	-0.127144	0.87113	0.383683	0.7528	C4
CD109	-0.0277927	0.063628	-0.4368	0.662259	All	-0.152501	0.0969159	0.881014	0.664602	0.0957386	-0.0418186	0.145829	-0.229466	-0.4368	0.662256	0.881006	C4
CCT5	-0.0327246	0.0839404	-0.389856	0.696646	All	-0.197245	0.131795	0.893064	0.664602	0.126302	-0.0492394	0.198312	-0.296791	-0.389856	0.696643	0.893058	C4
CD300E	0.308456	0.0812121	3.79816	0.000146001	All	0.149284	0.467629	0.0102133	0.664602	0.122197	0.464122	0.703628	0.224617	3.79816	0.000145776	0.0101977	C4
CCL16	-0.439317	0.0999219	-4.39661	1.10252e-05	All	-0.635161	-0.243474	0.00161079	0.664602	0.150349	-0.661024	-0.36634	-0.955707	-4.39661	1.09956e-05	0.00160645	C4
SCARB2	-0.0529687	0.0596599	-0.887845	0.37463	All	-0.1699	0.0639625	0.747968	0.664602	0.0897678	-0.0796999	0.0962451	-0.255645	-0.887845	0.374624	0.74794	C4
SCRN1	-0.0262873	0.106344	-0.247191	0.804762	All	-0.234719	0.182144	0.939977	0.664602	0.160012	-0.0395535	0.274071	-0.353178	-0.247191	0.804761	0.939974	C4
SCP2	-0.210998	0.146242	-1.4428	0.149085	All	-0.497626	0.075631	0.540574	0.664602	0.220044	-0.31748	0.113807	-0.748766	-1.4428	0.149077	0.540539	C4
SCLY	-0.393237	0.0941779	-4.17547	2.98029e-05	All	-0.577822	-0.208652	0.00322534	0.664602	0.141706	-0.591688	-0.313945	-0.869432	-4.17547	2.97371e-05	0.00321822	C4
SCGN	-0.0320098	0.0826811	-0.387148	0.698649	All	-0.194062	0.130042	0.893772	0.664602	0.124407	-0.0481639	0.195674	-0.292002	-0.387148	0.698647	0.89377	C4
SCGB3A2	0.426616	0.167409	2.54835	0.0108274	All	0.0985005	0.754732	0.176895	0.664602	0.251894	0.641912	1.13562	0.148201	2.54835	0.0108235	0.176758	C4
SCGB1A1	0.0190611	0.107508	0.1773	0.859274	All	-0.191651	0.229773	0.960102	0.664602	0.161763	0.0286805	0.345736	-0.288375	0.1773	0.859273	0.9601	C4
SCG3	0.187469	0.0653104	2.87043	0.00410135	All	0.0594631	0.315475	0.101143	0.664602	0.09827	0.282078	0.474687	0.0894683	2.87043	0.0040991	0.101039	C4
SCG2	-0.18975	0.0616789	-3.07642	0.00209651	All	-0.310639	-0.0688617	0.0658711	0.664602	0.0928058	-0.28551	-0.10361	-0.467409	-3.07642	0.00209503	0.0658246	C4
SCARF2	0.069966	0.0553225	1.26469	0.205989	All	-0.0384641	0.178396	0.610825	0.664602	0.0832416	0.105275	0.268429	-0.0578784	1.26469	0.205981	0.610802	C4
SCARF1	0.0473788	0.0819398	0.578216	0.563122	All	-0.11322	0.207978	0.841714	0.664602	0.123292	0.0712891	0.31294	-0.170362	0.578216	0.563119	0.841703	C4
RWDD1	-0.0377161	0.121927	-0.309334	0.757069	All	-0.276688	0.201256	0.919815	0.664602	0.183458	-0.0567499	0.302828	-0.416328	-0.309334	0.757067	0.919813	C4
SCARB1	-0.0949839	0.10719	-0.886123	0.375557	All	-0.305073	0.115106	0.748722	0.664602	0.161285	-0.142919	0.173201	-0.459038	-0.886123	0.375551	0.748711	C4
SCARA5	-0.00637975	0.0582096	-0.1096	0.912728	All	-0.120468	0.107709	0.972644	0.664602	0.0875857	-0.00959935	0.162069	-0.181267	-0.1096	0.912727	0.972643	C4
SCAMP3	0.401018	0.162375	2.46971	0.0135266	All	0.0827697	0.719267	0.198755	0.664602	0.244319	0.603396	1.08226	0.124532	2.46971	0.0135223	0.198616	C4
SAMD9L	0.142358	0.138553	1.02747	0.304207	All	-0.1292	0.413916	0.697438	0.664602	0.208475	0.214201	0.622811	-0.194409	1.02747	0.304201	0.6974	C4
S100P	0.0776833	0.105201	0.738428	0.460259	All	-0.128507	0.283873	0.792994	0.664602	0.158292	0.116887	0.427138	-0.193364	0.738428	0.460254	0.792985	C4
S100A4	-0.153761	0.108567	-1.41628	0.156703	All	-0.366549	0.0590268	0.551449	0.664602	0.163357	-0.231359	0.0888212	-0.551538	-1.41628	0.156695	0.55142	C4
S100A16	0.0970846	0.116313	0.834684	0.403901	All	-0.130885	0.325054	0.763034	0.664602	0.175011	0.146079	0.489102	-0.196943	0.834684	0.403895	0.763015	C4
S100A12	-0.174736	0.141033	-1.23898	0.215362	All	-0.451155	0.101683	0.618784	0.664602	0.212206	-0.262919	0.153006	-0.678843	-1.23898	0.215354	0.618746	C4
S100A11	0.142683	0.0911916	1.56465	0.117674	All	-0.0360497	0.321415	0.503118	0.664602	0.137212	0.214689	0.483625	-0.0542475	1.56465	0.117666	0.503083	C4
SDC1	0.0115926	0.0753079	0.153936	0.877661	All	-0.136008	0.159193	0.964386	0.664602	0.113313	0.0174429	0.239536	-0.20465	0.153936	0.87766	0.964384	C4
SDC4	-0.0810205	0.0885398	-0.915074	0.360159	All	-0.254555	0.0925144	0.736114	0.664602	0.133222	-0.121908	0.139207	-0.383024	-0.915074	0.360153	0.7361	C4
SERPINA9	0.185521	0.135398	1.37019	0.170635	All	-0.0798535	0.450895	0.568134	0.664602	0.203727	0.279146	0.678451	-0.12016	1.37019	0.170626	0.568076	C4
SEZ6L2	0.0932053	0.0460249	2.0251	0.0428637	All	0.00299803	0.183413	0.339118	0.664602	0.0692519	0.140242	0.275976	0.00450852	2.0251	0.0428568	0.339064	C4
SEZ6L	0.121175	0.0540178	2.24323	0.0248874	All	0.0153017	0.227048	0.267685	0.664602	0.0812785	0.182327	0.341633	0.0230209	2.24323	0.0248817	0.267623	C4
SETMAR	-0.0291529	0.0584861	-0.498459	0.618163	All	-0.143784	0.0854777	0.862474	0.664602	0.0880017	-0.0438652	0.128618	-0.216349	-0.498459	0.618161	0.862464	C4
SESTD1	-0.041023	0.120273	-0.341083	0.733043	All	-0.276753	0.194707	0.911081	0.664602	0.180969	-0.0617257	0.292974	-0.416426	-0.341083	0.733041	0.911078	C4
SERPINE1	-0.0957586	0.131999	-0.72545	0.468181	All	-0.354472	0.162955	0.795993	0.664602	0.198614	-0.144084	0.245198	-0.533367	-0.72545	0.468176	0.795978	C4
SERPINB9	0.00697276	0.063111	0.110484	0.912026	All	-0.116723	0.130668	0.972427	0.664602	0.0949606	0.0104916	0.196614	-0.175631	0.110484	0.912026	0.972426	C4
SERPINB8	0.0782261	0.115348	0.678175	0.497665	All	-0.147852	0.304304	0.809185	0.664602	0.173559	0.117704	0.45788	-0.222473	0.678175	0.497661	0.809168	C4
SERPINB6	0.000630664	0.113702	0.00554665	0.995574	All	-0.222221	0.223482	0.998735	0.664602	0.171082	0.000948935	0.33627	-0.334373	0.00554665	0.995574	0.998735	C4
SERPINB5	-0.174896	0.0913121	-1.91536	0.0554539	All	-0.353864	0.00407278	0.378873	0.664602	0.137394	-0.263159	0.0061331	-0.53245	-1.91536	0.0554465	0.378763	C4
SERPINB1	-0.0344941	0.171375	-0.201279	0.840482	All	-0.370383	0.301395	0.954493	0.664602	0.257861	-0.051902	0.453506	-0.55731	-0.201279	0.840481	0.95449	C4
SELE	-0.315193	0.102079	-3.08775	0.00201823	All	-0.515264	-0.115123	0.0641007	0.664602	0.153594	-0.474259	-0.173215	-0.775303	-3.08775	0.00201678	0.0640548	C4
SERPINA12	-0.76122	0.18979	-4.01085	6.06154e-05	All	-1.1332	-0.389238	0.00571349	0.664602	0.28557	-1.14538	-0.585661	-1.7051	-4.01085	6.05003e-05	0.00570264	C4
SERPINA11	0.0658404	0.0793443	0.829806	0.406654	All	-0.0896716	0.221352	0.766443	0.664602	0.119386	0.0990675	0.333065	-0.13493	0.829806	0.406648	0.766433	C4
SEPTIN9	0.0108885	0.0555405	0.196046	0.844575	All	-0.0979689	0.119746	0.955761	0.664602	0.0835696	0.0163835	0.18018	-0.147413	0.196046	0.844574	0.955759	C4
SEMA7A	0.047959	0.0533119	0.899593	0.368343	All	-0.0565304	0.152448	0.743075	0.664602	0.0802163	0.072162	0.229386	-0.0850619	0.899593	0.368337	0.743053	C4
SEMA4D	0.0455786	0.0579121	0.78703	0.431269	All	-0.067927	0.159084	0.778634	0.664602	0.087138	0.0685802	0.239371	-0.10221	0.78703	0.431264	0.778624	C4
SEMA4C	0.0666664	0.0532366	1.25227	0.210481	All	-0.0376755	0.171008	0.612981	0.664602	0.080103	0.10031	0.257312	-0.0566917	1.25227	0.210473	0.612959	C4
SEMA3F	-0.0493615	0.0527859	-0.935126	0.34973	All	-0.15282	0.054097	0.72911	0.664602	0.0794249	-0.0742722	0.0814005	-0.229945	-0.935126	0.349724	0.729079	C4
SELPLG	-0.24315	0.0500564	-4.85751	1.19341e-06	All	-0.341258	-0.145041	0.000268242	0.664602	0.0753179	-0.365858	-0.218234	-0.513481	-4.85751	1.18871e-06	0.000267186	C4
SELP	-0.0255813	0.11009	-0.232368	0.816254	All	-0.241353	0.19019	0.944889	0.664602	0.165648	-0.0384911	0.286178	-0.36316	-0.232368	0.816253	0.944888	C4
SF3B4	0.0322421	0.14118	0.228376	0.819355	All	-0.244466	0.30895	0.945909	0.664602	0.212428	0.0485134	0.464872	-0.367845	0.228376	0.819354	0.945908	C4
CERT	-0.0046379	0.114714	-0.0404302	0.96775	All	-0.229473	0.220197	0.991554	0.664602	0.172605	-0.00697846	0.331328	-0.345285	-0.0404302	0.96775	0.991554	C4
CHGB	0.00991706	0.0794509	0.12482	0.900667	All	-0.145804	0.165638	0.968641	0.664602	0.119547	0.0149218	0.249233	-0.219389	0.12482	0.900666	0.968639	C4
CHEK2	0.0787052	0.063726	1.23506	0.216817	All	-0.0461955	0.203606	0.619532	0.664602	0.095886	0.118425	0.306361	-0.069512	1.23506	0.21681	0.619491	C4
CHAC2	-0.149111	0.112142	-1.32967	0.183636	All	-0.368905	0.0706828	0.583245	0.664602	0.168735	-0.224362	0.10636	-0.555083	-1.32967	0.183628	0.58322	C4
CGREF1	0.0212459	0.0817294	0.259955	0.7949	All	-0.138941	0.181433	0.935943	0.664602	0.122975	0.0319679	0.272999	-0.209063	0.259955	0.794899	0.935941	C4
CGA	-0.0379924	0.142342	-0.26691	0.78954	All	-0.316977	0.240992	0.933066	0.664602	0.214176	-0.0571657	0.362619	-0.47695	-0.26691	0.789538	0.933063	C4
CFC1	-0.0565417	0.0886486	-0.637818	0.523596	All	-0.23029	0.117206	0.823229	0.664602	0.133386	-0.0850761	0.176361	-0.346513	-0.637818	0.523592	0.823214	C4
CETN2	0.0267014	0.127068	0.210134	0.833564	All	-0.222348	0.275751	0.951559	0.664602	0.191195	0.0401766	0.414918	-0.334565	0.210134	0.833563	0.951558	C4
CES3	-0.492778	0.13443	-3.66567	0.000247024	All	-0.756257	-0.229299	0.0147307	0.664602	0.202272	-0.741464	-0.34501	-1.13792	-3.66567	0.00024669	0.0147108	C4
CES2	-0.38715	0.106882	-3.62222	0.000292466	All	-0.596635	-0.177665	0.0165404	0.664602	0.160821	-0.582529	-0.26732	-0.897739	-3.62222	0.000292088	0.0164975	C4
CES1	-1.00134	0.164376	-6.09177	1.12737e-09	All	-1.32351	-0.679168	7.05896e-07	0.664602	0.24733	-1.50667	-1.02191	-1.99144	-6.09177	1.11672e-09	6.99224e-07	C4
CEACAM21	0.144686	0.163439	0.885256	0.376024	All	-0.175649	0.465021	0.748897	0.664602	0.245921	0.217703	0.699707	-0.264302	0.885256	0.376018	0.748869	C4
CEP85	-0.0548146	0.119657	-0.458099	0.646884	All	-0.289337	0.179708	0.874783	0.664602	0.180043	-0.0824773	0.270406	-0.435361	-0.458099	0.646881	0.874776	C4
CEP43	-0.00667487	0.129536	-0.0515292	0.958904	All	-0.26056	0.24721	0.987086	0.664602	0.194907	-0.0100434	0.371975	-0.392062	-0.0515292	0.958904	0.987085	C4
CEP20	-0.267081	0.140789	-1.89703	0.0578315	All	-0.543021	0.00886043	0.385182	0.664602	0.211839	-0.401866	0.0133396	-0.817071	-1.89703	0.057824	0.385074	C4
CEP164	0.0263259	0.120103	0.219194	0.8265	All	-0.209072	0.261724	0.948081	0.664602	0.180714	0.0396116	0.393812	-0.314589	0.219194	0.826499	0.948078	C4
CELA3A	-0.223861	0.110197	-2.03146	0.0422153	All	-0.439843	-0.00787865	0.337412	0.664602	0.165809	-0.336834	-0.0118487	-0.66182	-2.03146	0.0422084	0.337299	C4
CEBPB	-0.0396143	0.0723275	-0.547708	0.583895	All	-0.181374	0.102145	0.848405	0.664602	0.108828	-0.0596061	0.153697	-0.27291	-0.547708	0.583892	0.8484	C4
CEACAM8	-0.0635928	0.0946305	-0.672012	0.50158	All	-0.249065	0.12188	0.811827	0.664602	0.142387	-0.0956856	0.183393	-0.374764	-0.672012	0.501576	0.81182	C4
CEACAM5	-0.217721	0.124361	-1.75071	0.080004	All	-0.461464	0.0260232	0.436967	0.664602	0.187122	-0.327596	0.0391628	-0.694354	-1.75071	0.079996	0.436886	C4
CEACAM3	-0.0821657	0.0900841	-0.912101	0.361722	All	-0.258727	0.0943958	0.737865	0.664602	0.135546	-0.123631	0.142038	-0.389301	-0.912101	0.361716	0.737836	C4
CHI3L1	-0.0152111	0.149036	-0.102063	0.918707	All	-0.307317	0.276895	0.974576	0.664602	0.224249	-0.0228876	0.416641	-0.462416	-0.102063	0.918707	0.974574	C4
CHIT1	0.0912271	0.290925	0.313576	0.753845	All	-0.478976	0.66143	0.918549	0.664602	0.437744	0.137266	0.995244	-0.720712	0.313576	0.753843	0.918546	C4
CLEC14A	0.120208	0.0605194	1.98627	0.0470108	All	0.00159186	0.238823	0.349827	0.664602	0.0910611	0.180872	0.359351	0.00239192	1.98627	0.0470037	0.349774	C4
CLIP2	-0.0924696	0.214679	-0.430735	0.666664	All	-0.513232	0.328293	0.882468	0.664602	0.323019	-0.139135	0.493981	-0.772252	-0.430735	0.666661	0.882462	C4
CLEC7A	0.0932931	0.115371	0.808635	0.41873	All	-0.13283	0.319416	0.77357	0.664602	0.173594	0.140374	0.480619	-0.19987	0.808635	0.418725	0.77356	C4
CLEC6A	-0.0977072	0.0877615	-1.11333	0.265575	All	-0.269717	0.0743022	0.667894	0.664602	0.132051	-0.147016	0.111804	-0.405837	-1.11333	0.265568	0.667862	C4
CLEC5A	-0.156101	0.0568295	-2.74683	0.00602029	All	-0.267485	-0.0447171	0.127813	0.664602	0.0855091	-0.234879	-0.067281	-0.402477	-2.74683	0.00601747	0.127722	C4
CLEC4G	-0.0702242	0.0644949	-1.08883	0.276235	All	-0.196632	0.0561836	0.677395	0.664602	0.097043	-0.105664	0.0845407	-0.295868	-1.08883	0.276228	0.677359	C4
CLEC4D	-0.395122	0.120038	-3.29165	0.000996923	All	-0.630392	-0.159853	0.0383363	0.664602	0.180616	-0.594525	-0.240517	-0.948533	-3.29165	0.000996021	0.0382944	C4
CLEC4C	0.34294	0.0903936	3.79385	0.000148555	All	0.165772	0.520109	0.0102133	0.664602	0.136012	0.516009	0.782592	0.249426	3.79385	0.000148326	0.0101977	C4
CLEC4A	0.0810083	0.0668341	1.21208	0.225489	All	-0.0499842	0.212001	0.628902	0.664602	0.100563	0.12189	0.318993	-0.0752129	1.21208	0.225482	0.628881	C4
CLEC1B	-0.0323526	0.185981	-0.173957	0.8619	All	-0.396869	0.332163	0.960577	0.664602	0.279838	-0.0486797	0.499803	-0.597163	-0.173957	0.861899	0.960575	C4
CLEC1A	0.20474	0.0620396	3.30015	0.000967212	All	0.0831447	0.326335	0.0377997	0.664602	0.0933485	0.308064	0.491027	0.125101	3.30015	0.000966326	0.0377652	C4
CHL1	0.0982162	0.0591171	1.66138	0.0966447	All	-0.0176512	0.214084	0.469096	0.664602	0.0889512	0.147782	0.322126	-0.0265623	1.66138	0.0966365	0.469015	C4
CLEC11A	-0.0623152	0.0918672	-0.678318	0.497574	All	-0.242371	0.117741	0.809185	0.664602	0.138229	-0.0937632	0.177165	-0.364692	-0.678318	0.49757	0.809168	C4
CLEC10A	0.185924	0.0686757	2.70727	0.00678685	All	0.0513221	0.320526	0.136533	0.664602	0.103334	0.279753	0.482287	0.0772186	2.70727	0.00678383	0.136428	C4
CLC	0.656299	0.128073	5.12441	2.99926e-07	All	0.40528	0.907317	8.66473e-05	0.664602	0.192707	0.987507	1.36521	0.609802	5.12441	2.98474e-07	8.6229e-05	C4
CKMT1A_CKMT1B	-0.0572815	0.13051	-0.438906	0.660732	All	-0.313076	0.198513	0.879839	0.664602	0.196373	-0.0861892	0.298702	-0.47108	-0.438906	0.66073	0.879836	C4
CKAP4	0.033155	0.0526901	0.629245	0.529192	All	-0.0701158	0.136426	0.825938	0.664602	0.0792808	0.049887	0.205277	-0.105503	0.629245	0.529189	0.825923	C4
CIAPIN1	-0.0211979	0.120136	-0.17645	0.859941	All	-0.256659	0.214264	0.960102	0.664602	0.180763	-0.0318956	0.3224	-0.386192	-0.17645	0.859941	0.9601	C4
CHRDL2	-0.501305	0.100113	-5.0074	5.54163e-07	All	-0.697523	-0.305088	0.000142876	0.664602	0.150636	-0.754295	-0.459048	-1.04954	-5.0074	5.51707e-07	0.000142243	C4
CHRDL1	0.129785	0.0606607	2.13953	0.0323992	All	0.0108925	0.248678	0.302461	0.664602	0.0912737	0.195283	0.374179	0.0163863	2.13953	0.0323929	0.302402	C4
CHMP1A	-0.12416	0.149321	-0.831493	0.405701	All	-0.416824	0.168505	0.765305	0.664602	0.224678	-0.186818	0.253551	-0.627187	-0.831493	0.405695	0.765295	C4
CLMP	0.152752	0.0439082	3.4789	0.000504036	All	0.0666938	0.238811	0.0252479	0.664602	0.0660669	0.22984	0.359332	0.100349	3.4789	0.000503476	0.0252198	C4
CEACAM1	-0.0589061	0.0386129	-1.52556	0.127128	All	-0.134586	0.0167737	0.514262	0.664602	0.0580992	-0.0886338	0.0252408	-0.202508	-1.52556	0.12712	0.514229	C4
CD48	0.0475474	0.0575196	0.82663	0.408452	All	-0.0651889	0.160284	0.767522	0.664602	0.0865475	0.0715427	0.241176	-0.0980903	0.82663	0.408447	0.767511	C4
CD79B	0.122156	0.0868451	1.40659	0.159556	All	-0.0480575	0.292369	0.555688	0.664602	0.130672	0.183803	0.439921	-0.0723149	1.40659	0.159548	0.55566	C4
CD74	0.0809894	0.0680071	1.1909	0.233702	All	-0.0523021	0.214281	0.638601	0.664602	0.102328	0.121862	0.322424	-0.0787006	1.1909	0.233695	0.638581	C4
CD70	0.0354866	0.0826056	0.429591	0.667496	All	-0.126417	0.197391	0.882468	0.664602	0.124293	0.0533953	0.29701	-0.19022	0.429591	0.667493	0.882462	C4
CD69	0.0157119	0.167453	0.0938286	0.925246	All	-0.312491	0.343915	0.975947	0.664602	0.251961	0.0236411	0.517484	-0.470202	0.0938286	0.925245	0.975946	C4
CD63	-0.157499	0.0983582	-1.60128	0.109324	All	-0.350277	0.03528	0.491625	0.664602	0.147996	-0.236982	0.0530897	-0.527054	-1.60128	0.109316	0.491544	C4
CD6	-0.0143822	0.102656	-0.140101	0.888581	All	-0.215583	0.186819	0.964978	0.664602	0.154462	-0.0216403	0.281105	-0.324385	-0.140101	0.88858	0.964977	C4
CD59	0.0673132	0.0430864	1.56228	0.11823	All	-0.0171347	0.151761	0.503712	0.664602	0.0648305	0.101283	0.228351	-0.0257843	1.56228	0.118222	0.503676	C4
CD58	0.0101807	0.03349	0.303994	0.761134	All	-0.0554584	0.0758199	0.921307	0.664602	0.0503911	0.0153186	0.114085	-0.0834479	0.303994	0.761133	0.921305	C4
CD55	0.109085	0.0477536	2.28433	0.0223578	All	0.0154895	0.20268	0.253543	0.664602	0.071853	0.164136	0.304968	0.0233038	2.28433	0.0223524	0.253481	C4
CD5	0.0352866	0.0667481	0.528652	0.59705	All	-0.0955374	0.166111	0.856013	0.664602	0.100433	0.0530943	0.249944	-0.143755	0.528652	0.597047	0.856002	C4
CD300LF	0.125834	0.114086	1.10297	0.270045	All	-0.0977705	0.349438	0.672313	0.664602	0.171661	0.189337	0.525792	-0.147118	1.10297	0.270038	0.672296	C4
CD46	0.062026	0.0543627	1.14097	0.253892	All	-0.044523	0.168575	0.659133	0.664602	0.0817975	0.0933281	0.253651	-0.066995	1.14097	0.253884	0.659111	C4
CD40LG	0.0297287	0.151502	0.196227	0.844434	All	-0.26721	0.326667	0.955761	0.664602	0.227959	0.0447316	0.491531	-0.402068	0.196227	0.844433	0.955759	C4
CD40	0.0330927	0.0957548	0.345598	0.729647	All	-0.154583	0.220769	0.909956	0.664602	0.144078	0.0497932	0.332187	-0.2326	0.345598	0.729645	0.909954	C4
CD4	-0.0321468	0.0574377	-0.559681	0.5757	All	-0.144722	0.080429	0.846802	0.664602	0.0864242	-0.04837	0.121021	-0.217761	-0.559681	0.575697	0.846797	C4
CD38	-0.0491313	0.0609669	-0.805869	0.420323	All	-0.168624	0.0703615	0.774315	0.664602	0.0917344	-0.0739259	0.105874	-0.253725	-0.805869	0.420318	0.774292	C4
CD34	0.115973	0.0465475	2.4915	0.0127247	All	0.0247417	0.207205	0.193991	0.664602	0.0700382	0.1745	0.311775	0.0372253	2.4915	0.0127205	0.193927	C4
CD33	-0.138903	0.156094	-0.889868	0.373543	All	-0.444841	0.167035	0.747531	0.664602	0.234868	-0.209002	0.25134	-0.669343	-0.889868	0.373537	0.747503	C4
CD302	0.10446	0.0587186	1.77898	0.0752502	All	-0.0106268	0.219546	0.425581	0.664602	0.0883516	0.157176	0.330345	-0.015993	1.77898	0.0752422	0.425531	C4
CD300LG	0.367904	0.0715994	5.13837	2.78493e-07	All	0.227572	0.508237	8.60255e-05	0.664602	0.107733	0.553571	0.764728	0.342415	5.13837	2.77131e-07	8.512e-05	C4
CD83	0.115651	0.067027	1.72544	0.0844563	All	-0.0157195	0.247021	0.445915	0.664602	0.100853	0.174015	0.371687	-0.0236561	1.72544	0.0844483	0.445872	C4
CD84	-0.00773576	0.059568	-0.129864	0.896674	All	-0.124487	0.109015	0.967459	0.664602	0.0896296	-0.0116397	0.164034	-0.187314	-0.129864	0.896674	0.967457	C4
CDH2	-0.172971	0.0702403	-2.46256	0.0137994	All	-0.310639	-0.0353023	0.200786	0.664602	0.105688	-0.260262	-0.0531141	-0.467411	-2.46256	0.013795	0.200648	C4
CDON	-0.00616897	0.0504739	-0.122221	0.902725	All	-0.105096	0.092758	0.969765	0.664602	0.0759461	-0.0092822	0.139572	-0.158136	-0.122221	0.902724	0.969765	C4
CDNF	0.0466844	0.061876	0.754483	0.450564	All	-0.0745903	0.167959	0.788467	0.664602	0.0931024	0.0702442	0.252725	-0.112236	0.754483	0.450559	0.788446	C4
CDKN2D	-0.112754	0.178485	-0.631725	0.52757	All	-0.462579	0.237071	0.825335	0.664602	0.26856	-0.169656	0.356721	-0.696033	-0.631725	0.527567	0.825324	C4
CDKN1A	-0.35483	0.201636	-1.75975	0.0784578	All	-0.75003	0.0403699	0.435016	0.664602	0.303394	-0.533899	0.0607539	-1.12855	-1.75975	0.0784498	0.434972	C4
CDHR5	-0.113643	0.0763102	-1.48922	0.136437	All	-0.263208	0.0359224	0.525623	0.664602	0.114821	-0.170994	0.0540551	-0.396043	-1.48922	0.136429	0.525555	C4
CDHR2	-0.792241	0.150962	-5.24796	1.54615e-07	All	-1.08812	-0.496362	5.6473e-05	0.664602	0.227146	-1.19205	-0.746847	-1.63726	-5.24796	1.53795e-07	5.61737e-05	C4
CDHR1	0.0996001	0.0811629	1.22716	0.219769	All	-0.0594764	0.258676	0.624068	0.664602	0.122123	0.149864	0.389225	-0.0894961	1.22716	0.219762	0.624046	C4
CDH6	-0.0322656	0.0729655	-0.442204	0.658344	All	-0.175275	0.110744	0.878527	0.664602	0.109788	-0.0485488	0.166636	-0.263734	-0.442204	0.658342	0.878524	C4
CDH5	0.146098	0.0577643	2.52921	0.0114359	All	0.0328822	0.259314	0.181607	0.664602	0.0869157	0.219828	0.390183	0.0494734	2.52921	0.0114319	0.181544	C4
CDH3	0.0926996	0.068304	1.35716	0.174738	All	-0.0411738	0.226573	0.572527	0.664602	0.102774	0.139481	0.340919	-0.0619562	1.35716	0.17473	0.572471	C4
CD8A	-0.145953	0.0966888	-1.50951	0.131177	All	-0.335459	0.0435539	0.520087	0.664602	0.145484	-0.219609	0.0655391	-0.504757	-1.50951	0.131169	0.520041	C4
CDH17	-0.258244	0.128624	-2.00774	0.0446783	All	-0.510343	-0.00614471	0.343103	0.664602	0.193536	-0.388569	-0.00923874	-0.7679	-2.00774	0.0446713	0.343002	C4
CDH15	-0.327045	0.113637	-2.87798	0.00400449	All	-0.549769	-0.104321	0.0994429	0.664602	0.170985	-0.492092	-0.156961	-0.827222	-2.87798	0.00400227	0.0993877	C4
CDH1	-0.0032005	0.0737631	-0.0433889	0.965392	All	-0.147774	0.141373	0.990757	0.664602	0.110988	-0.00481567	0.212722	-0.222353	-0.0433889	0.965392	0.990757	C4
CDCP1	-0.346085	0.0998588	-3.46574	0.000529355	All	-0.541805	-0.150365	0.0262165	0.664602	0.150254	-0.52074	-0.226243	-0.815237	-3.46574	0.000528774	0.0261877	C4
CDC37	-0.0542836	0.159727	-0.339854	0.733969	All	-0.367342	0.258775	0.911198	0.664602	0.240334	-0.0816785	0.389377	-0.552733	-0.339854	0.733967	0.911196	C4
CDC27	-0.0625326	0.113534	-0.550783	0.581786	All	-0.285055	0.15999	0.848089	0.664602	0.17083	-0.0940903	0.240737	-0.428918	-0.550783	0.581783	0.848079	C4
CD99L2	0.0474328	0.0476716	0.994991	0.319747	All	-0.0460018	0.140867	0.70901	0.664602	0.0717296	0.0713702	0.21196	-0.0692197	0.994991	0.319741	0.708984	C4
CD99	0.0987057	0.0376155	2.62407	0.00869209	All	0.0249806	0.172431	0.157753	0.664602	0.0565986	0.148519	0.259452	0.0375853	2.62407	0.00868863	0.15769	C4
CD93	0.155166	0.0576152	2.69315	0.00708112	All	0.0422427	0.26809	0.141075	0.664602	0.0866913	0.233473	0.403387	0.0635577	2.69315	0.00707803	0.141006	C4
CDSN	0.0853052	0.0827543	1.03083	0.302629	All	-0.0768902	0.247501	0.696834	0.664602	0.124517	0.128355	0.372409	-0.115698	1.03083	0.302623	0.696819	C4
RUVBL1	-0.294048	0.194406	-1.51254	0.130404	All	-0.675078	0.0869812	0.519823	0.664602	0.292516	-0.442443	0.130888	-1.01577	-1.51254	0.130395	0.519739	C4
BIN2	0.125213	0.173057	0.723535	0.469356	All	-0.213973	0.464399	0.796896	0.664602	0.260393	0.188403	0.698772	-0.321966	0.723535	0.469351	0.796888	C4
BST1	0.096412	0.0920252	1.04767	0.294798	All	-0.0839541	0.276778	0.691607	0.664602	0.138467	0.145067	0.416462	-0.126327	1.04767	0.294791	0.691591	C4
BSG	0.0231821	0.0390824	0.593159	0.553078	All	-0.053418	0.0997822	0.837282	0.664602	0.0588058	0.0348812	0.15014	-0.0803781	0.593159	0.553074	0.83727	C4
BRK1	0.0771169	0.0839075	0.919071	0.358064	All	-0.0873387	0.241573	0.734908	0.664602	0.126252	0.116035	0.363489	-0.13142	0.919071	0.358059	0.734896	C4
BPIFB1	0.266446	0.126326	2.1092	0.0349342	All	0.0188519	0.514041	0.308566	0.664602	0.190078	0.400911	0.773464	0.0283588	2.1092	0.0349277	0.308508	C4
BOC	0.0315668	0.0443726	0.711403	0.476839	All	-0.0554019	0.118535	0.799994	0.664602	0.0667657	0.0474973	0.178358	-0.0833634	0.711403	0.476834	0.799987	C4
BMP6	-0.0568216	0.0774745	-0.733423	0.463305	All	-0.208669	0.0950257	0.79447	0.664602	0.116573	-0.0854973	0.142986	-0.31398	-0.733423	0.4633	0.794462	C4
BMP4	-0.214358	0.0866236	-2.47459	0.0133432	All	-0.384137	-0.0445789	0.198755	0.664602	0.130339	-0.322536	-0.0670714	-0.578001	-2.47459	0.0133389	0.198616	C4
BLVRB	-0.12588	0.125766	-1.00091	0.316878	All	-0.372377	0.120617	0.707348	0.664602	0.189235	-0.189407	0.181495	-0.560308	-1.00091	0.316872	0.707334	C4
BLMH	0.00408008	0.0614013	0.0664493	0.94702	All	-0.116264	0.124425	0.983309	0.664602	0.0923882	0.00613913	0.18722	-0.174942	0.0664493	0.94702	0.983308	C4
BIRC2	-0.0613261	0.118112	-0.519219	0.603611	All	-0.292822	0.170169	0.859339	0.664602	0.177719	-0.0922749	0.256054	-0.440603	-0.519219	0.603608	0.859331	C4
BAIAP2	-0.27851	0.123638	-2.25261	0.0242892	All	-0.520837	-0.0361827	0.26384	0.664602	0.186034	-0.419062	-0.054436	-0.783689	-2.25261	0.0242835	0.263779	C4
BID	-0.06564	0.129255	-0.507834	0.611572	All	-0.318975	0.187695	0.860809	0.664602	0.194485	-0.098766	0.282424	-0.479956	-0.507834	0.611569	0.860798	C4
BGN	0.323781	0.222744	1.4536	0.146065	All	-0.112789	0.760351	0.535008	0.664602	0.335154	0.48718	1.14408	-0.169722	1.4536	0.146057	0.534951	C4
BCR	-0.0594802	0.174336	-0.341181	0.732969	All	-0.401173	0.282213	0.911081	0.664602	0.262317	-0.0894974	0.424644	-0.603639	-0.341181	0.732968	0.911078	C4
BCL2L11	0.0614298	0.0831303	0.738957	0.459937	All	-0.101503	0.224362	0.792994	0.664602	0.125083	0.092431	0.337593	-0.152732	0.738957	0.459933	0.792985	C4
BCAN	0.185517	0.0674951	2.74859	0.00598796	All	0.0532286	0.317804	0.127813	0.664602	0.101557	0.279139	0.478191	0.0800874	2.74859	0.00598515	0.127722	C4
BCAM	0.0197609	0.0460691	0.42894	0.667969	All	-0.0705329	0.110055	0.882468	0.664602	0.0693184	0.0297334	0.165597	-0.106131	0.42894	0.667967	0.882462	C4
BAX	0.0995027	0.16866	0.58996	0.555221	All	-0.231065	0.43007	0.837282	0.664602	0.253776	0.149718	0.647119	-0.347683	0.58996	0.555217	0.83727	C4
BANK1	-0.159557	0.201654	-0.791243	0.428807	All	-0.554792	0.235677	0.778256	0.664602	0.303421	-0.24008	0.354626	-0.834785	-0.791243	0.428802	0.778236	C4
BAMBI	0.00862867	0.0550304	0.156798	0.875405	All	-0.099229	0.116486	0.964327	0.664602	0.0828021	0.0129832	0.175275	-0.149309	0.156798	0.875404	0.964325	C4
BST2	-0.122797	0.100402	-1.22306	0.221316	All	-0.319582	0.0739873	0.625234	0.664602	0.151071	-0.184769	0.111331	-0.480868	-1.22306	0.221309	0.625209	C4
BTC	0.0530741	0.139021	0.381772	0.702633	All	-0.219401	0.325549	0.895895	0.664602	0.209179	0.0798586	0.489849	-0.330132	0.381772	0.702631	0.895892	C4
CA12	-0.0209983	0.061904	-0.339208	0.734455	All	-0.142328	0.100331	0.91139	0.664602	0.0931444	-0.0315953	0.150968	-0.214158	-0.339208	0.734453	0.911385	C4
CALB2	0.0305093	0.0589174	0.517832	0.604579	All	-0.0849666	0.145985	0.859339	0.664602	0.0886506	0.0459061	0.219661	-0.127849	0.517832	0.604576	0.859331	C4
CALB1	0.117389	0.0825973	1.42123	0.155259	All	-0.0444983	0.279277	0.549399	0.664602	0.124281	0.176631	0.420222	-0.0669593	1.42123	0.155251	0.549363	C4
CA9	0.0181331	0.0884964	0.204902	0.83765	All	-0.155317	0.191583	0.953374	0.664602	0.133157	0.0272841	0.288272	-0.233704	0.204902	0.837649	0.953373	C4
CA6	0.00181855	0.122728	0.0148178	0.988178	All	-0.238723	0.242361	0.996388	0.664602	0.184664	0.00273631	0.364677	-0.359204	0.0148178	0.988178	0.996388	C4
CA5A	-0.418806	0.176787	-2.36899	0.0178416	All	-0.765302	-0.0723107	0.2267	0.664602	0.266004	-0.630161	-0.108793	-1.15153	-2.36899	0.0178366	0.226564	C4
CA4	0.197531	0.0466529	4.23405	2.30058e-05	All	0.106093	0.288969	0.00272525	0.664602	0.0701968	0.297217	0.434802	0.159631	4.23405	2.29521e-05	0.00271889	C4
CA3	-0.194293	0.116271	-1.67103	0.0947241	All	-0.42218	0.0335948	0.465934	0.664602	0.174949	-0.292344	0.0505551	-0.635244	-1.67103	0.0947159	0.465847	C4
CA2	-0.189708	0.131784	-1.43954	0.150006	All	-0.448	0.0685834	0.541579	0.664602	0.19829	-0.285447	0.103202	-0.674095	-1.43954	0.149997	0.541524	C4
CA14	0.213596	0.0714093	2.99116	0.00278101	All	0.0736366	0.353556	0.0786399	0.664602	0.107447	0.32139	0.531986	0.110794	2.99116	0.00277924	0.0785898	C4
CA13	-0.11188	0.197563	-0.566299	0.571194	All	-0.499095	0.275336	0.844736	0.664602	0.297265	-0.168341	0.414298	-0.75098	-0.566299	0.571191	0.844725	C4
BTN2A1	0.120745	0.0503233	2.39938	0.0164275	All	0.022113	0.219377	0.21723	0.664602	0.0757195	0.18168	0.33009	0.0332699	2.39938	0.0164227	0.217071	C4
CA11	0.0278479	0.0602176	0.462454	0.643758	All	-0.0901765	0.145872	0.873288	0.664602	0.090607	0.0419016	0.219491	-0.135688	0.462454	0.643756	0.873284	C4
CA1	-0.180208	0.111901	-1.61043	0.107313	All	-0.39953	0.0391134	0.48817	0.664602	0.168373	-0.271152	0.0588584	-0.601162	-1.61043	0.107305	0.488133	C4
C4BPB	0.0987761	0.0760506	1.29882	0.194013	All	-0.0502803	0.247833	0.596736	0.664602	0.11443	0.148624	0.372908	-0.075659	1.29882	0.194005	0.596691	C4
C2CD2L	-0.0450044	0.0807078	-0.557621	0.577106	All	-0.203189	0.11318	0.846802	0.664602	0.121438	-0.0677164	0.170302	-0.305735	-0.557621	0.577103	0.846797	C4
C2	0.00461631	0.0458918	0.100591	0.919876	All	-0.0853299	0.0945626	0.975151	0.664602	0.0690516	0.00694598	0.142287	-0.128395	0.100591	0.919875	0.97515	C4
C1QTNF1	-0.164377	0.0826246	-1.98944	0.04666	All	-0.326318	-0.00243532	0.348697	0.664602	0.124322	-0.247331	-0.00365985	-0.491002	-1.98944	0.0466528	0.348643	C4
C1QA	0.0188631	0.0433898	0.434735	0.663757	All	-0.0661794	0.103906	0.882125	0.664602	0.0652869	0.0283825	0.156345	-0.0995799	0.434735	0.663755	0.882122	C4
C19orf12	-0.337667	0.1242	-2.71873	0.00655623	All	-0.581096	-0.0942392	0.133856	0.664602	0.186879	-0.508075	-0.141791	-0.874358	-2.71873	0.00655327	0.133743	C4
BTN3A2	0.0110507	0.0730339	0.151308	0.879733	All	-0.132093	0.154194	0.964386	0.664602	0.109891	0.0166275	0.232014	-0.198759	0.151308	0.879732	0.964384	C4
CALCA	-0.171027	0.120785	-1.41596	0.156796	All	-0.407761	0.0657078	0.551554	0.664602	0.181741	-0.257337	0.0988744	-0.613548	-1.41596	0.156788	0.551526	C4
BAG6	-0.0488836	0.0683271	-0.715434	0.474345	All	-0.182802	0.0850352	0.798031	0.664602	0.102809	-0.0735532	0.127953	-0.275059	-0.715434	0.474341	0.798016	C4
APEX1	-0.0956169	0.112409	-0.850615	0.394989	All	-0.315935	0.124701	0.758222	0.664602	0.169138	-0.143871	0.187639	-0.475381	-0.850615	0.394983	0.75821	C4
ARHGEF12	-0.0141792	0.196935	-0.0719993	0.942603	All	-0.400165	0.371807	0.982409	0.664602	0.296321	-0.0213349	0.559453	-0.602123	-0.0719993	0.942602	0.982408	C4
ARHGAP25	-0.0705004	0.112154	-0.628602	0.529613	All	-0.290319	0.149318	0.826084	0.664602	0.168754	-0.106079	0.224679	-0.436837	-0.628602	0.529609	0.826078	C4
ARHGAP1	-0.0601572	0.086294	-0.697119	0.485733	All	-0.22929	0.108976	0.803879	0.664602	0.129843	-0.0905161	0.163977	-0.345009	-0.697119	0.485729	0.803871	C4
ARG1	-0.081705	0.0978955	-0.834615	0.40394	All	-0.273577	0.110167	0.763034	0.664602	0.147299	-0.122938	0.165769	-0.411645	-0.834615	0.403935	0.763015	C4
AREG	-0.341279	0.08568	-3.98318	6.8124e-05	All	-0.509209	-0.173349	0.00622057	0.664602	0.128919	-0.513509	-0.260827	-0.766191	-3.98318	6.79982e-05	0.00620908	C4
APRT	-0.186483	0.0897932	-2.07681	0.0378259	All	-0.362475	-0.0104919	0.319544	0.664602	0.135108	-0.280594	-0.0157818	-0.545406	-2.07681	0.0378192	0.319421	C4
APP	0.0759397	0.127592	0.595174	0.55173	All	-0.174137	0.326016	0.837194	0.664602	0.191983	0.114263	0.49055	-0.262023	0.595174	0.551727	0.837188	C4
APOM	0.0592265	0.0536052	1.10487	0.269225	All	-0.0458377	0.164291	0.671606	0.664602	0.0806576	0.0891158	0.247205	-0.0689731	1.10487	0.269218	0.671589	C4
APOH	0.118953	0.0688621	1.72741	0.0841023	All	-0.0160142	0.25392	0.444657	0.664602	0.103614	0.178984	0.382068	-0.0240997	1.72741	0.0840943	0.444614	C4
APLP1	0.114042	0.100571	1.13394	0.256825	All	-0.0830736	0.311157	0.660472	0.664602	0.151325	0.171594	0.468191	-0.125003	1.13394	0.256818	0.660447	C4
ANKRD54	-0.0722268	0.10838	-0.66642	0.505147	All	-0.284648	0.140195	0.814994	0.664602	0.163076	-0.108677	0.210951	-0.428305	-0.66642	0.505143	0.814978	C4
APBB1IP	0.0701604	0.0888883	0.78931	0.429936	All	-0.104057	0.244378	0.778634	0.664602	0.133747	0.105568	0.367711	-0.156576	0.78931	0.429931	0.778624	C4
AOC3	-0.0683767	0.0576315	-1.18645	0.235453	All	-0.181332	0.0445789	0.639877	0.664602	0.0867158	-0.102884	0.0670792	-0.272847	-1.18645	0.235446	0.639854	C4
AOC1	-0.0246003	0.105976	-0.232131	0.816437	All	-0.232309	0.183109	0.944889	0.664602	0.159458	-0.0370151	0.275522	-0.349553	-0.232131	0.816436	0.944888	C4
ANXA5	-0.0597367	0.0570978	-1.04622	0.295467	All	-0.171646	0.0521729	0.691607	0.664602	0.0859128	-0.0898835	0.0785056	-0.258273	-1.04622	0.295461	0.691591	C4
ANXA4	0.0544077	0.137222	0.396495	0.691742	All	-0.214542	0.323357	0.891316	0.664602	0.206472	0.0818651	0.48655	-0.32282	0.396495	0.69174	0.891312	C4
ANXA3	-0.125431	0.13428	-0.934097	0.35026	All	-0.388616	0.137754	0.729355	0.664602	0.202047	-0.188731	0.20728	-0.584742	-0.934097	0.350254	0.729328	C4
ANXA11	-0.0728447	0.127168	-0.572821	0.566769	All	-0.32209	0.176401	0.843633	0.664602	0.191345	-0.109606	0.26543	-0.484643	-0.572821	0.566766	0.843628	C4
ANXA10	-0.0975216	0.152473	-0.639598	0.522438	All	-0.396364	0.201321	0.823229	0.664602	0.22942	-0.146737	0.302927	-0.596401	-0.639598	0.522434	0.823214	C4
ANPEP	-0.00339965	0.0532426	-0.0638522	0.949088	All	-0.107753	0.100954	0.983882	0.664602	0.080112	-0.00511533	0.151904	-0.162135	-0.0638522	0.949088	0.983882	C4
ARID4B	-0.0363111	0.0795556	-0.456424	0.648088	All	-0.192237	0.119615	0.875555	0.664602	0.119704	-0.0546359	0.179984	-0.289256	-0.456424	0.648085	0.875549	C4
ARNT	0.166045	0.0700305	2.37104	0.0177432	All	0.0287877	0.303302	0.2264	0.664602	0.105372	0.249841	0.456371	0.0433119	2.37104	0.0177382	0.226337	C4
ATP5PO	0.0469246	0.0779288	0.602147	0.54708	All	-0.105813	0.199662	0.834399	0.664602	0.117256	0.0706056	0.300428	-0.159217	0.602147	0.547077	0.834385	C4
BACH1	-0.138714	0.139491	-0.994432	0.320019	All	-0.412111	0.134683	0.70901	0.664602	0.209886	-0.208718	0.202659	-0.620095	-0.994432	0.320013	0.708984	C4
B4GAT1	0.0513592	0.0473288	1.08516	0.277859	All	-0.0414036	0.144122	0.67964	0.664602	0.0712138	0.0772781	0.216857	-0.0623009	1.08516	0.277852	0.679604	C4
B4GALT1	0.0210909	0.0529886	0.398027	0.690612	All	-0.0827649	0.124947	0.890936	0.664602	0.0797299	0.0317347	0.188005	-0.124536	0.398027	0.69061	0.890933	C4
AZU1	-0.0890622	0.145858	-0.610609	0.541462	All	-0.374939	0.196814	0.832566	0.664602	0.219467	-0.134008	0.296147	-0.564163	-0.610609	0.541459	0.832555	C4
AXL	0.0396701	0.0526624	0.753291	0.45128	All	-0.0635463	0.142887	0.788592	0.664602	0.079239	0.05969	0.214999	-0.0956185	0.753291	0.451275	0.788575	C4
AXIN1	-0.0886883	0.180997	-0.49	0.624137	All	-0.443435	0.266058	0.86464	0.664602	0.272338	-0.133446	0.400337	-0.667229	-0.49	0.624134	0.86463	C4
ATXN10	-0.009763	0.13549	-0.0720568	0.942557	All	-0.275319	0.255793	0.982409	0.664602	0.203867	-0.01469	0.384889	-0.414269	-0.0720568	0.942557	0.982408	C4
ATP6V1F	-0.0906629	0.12406	-0.730797	0.464908	All	-0.333817	0.152491	0.794979	0.664602	0.186669	-0.136417	0.229454	-0.502287	-0.730797	0.464903	0.79497	C4
ATP6V1D	0.0152017	0.0503065	0.302182	0.762515	All	-0.0833972	0.113801	0.921705	0.664602	0.0756942	0.0228734	0.171234	-0.125487	0.302182	0.762513	0.921703	C4
ATP6AP2	-0.0560179	0.076069	-0.736409	0.461486	All	-0.20511	0.0930746	0.793369	0.664602	0.114458	-0.0842879	0.14005	-0.308626	-0.736409	0.461482	0.793361	C4
ARSA	-0.384657	0.0854943	-4.49921	6.8406e-06	All	-0.552223	-0.217091	0.0010708	0.664602	0.12864	-0.578778	-0.326644	-0.830913	-4.49921	6.82049e-06	0.00106765	C4
ATP5IF1	0.0763284	0.211936	0.360149	0.718738	All	-0.339058	0.491715	0.905098	0.664602	0.318891	0.114848	0.739875	-0.510179	0.360149	0.718736	0.905092	C4
ATOX1	-0.286209	0.137279	-2.08488	0.0370871	All	-0.555271	-0.017148	0.317176	0.664602	0.206558	-0.430648	-0.0257944	-0.835502	-2.08488	0.0370804	0.317119	C4
ATG4A	-0.070591	0.110833	-0.636912	0.524186	All	-0.28782	0.146638	0.823229	0.664602	0.166766	-0.106216	0.220647	-0.433078	-0.636912	0.524182	0.823214	C4
ATF2	-0.0275318	0.128708	-0.213908	0.83062	All	-0.279795	0.224732	0.950302	0.664602	0.193662	-0.041426	0.338152	-0.421004	-0.213908	0.830619	0.9503	C4
ASGR1	-0.114606	0.0608587	-1.88315	0.0596876	All	-0.233887	0.00467479	0.388366	0.664602	0.0915717	-0.172443	0.00703727	-0.351924	-1.88315	0.05968	0.388241	C4
ASAH2	-0.217216	0.102697	-2.1151	0.0344276	All	-0.418499	-0.0159325	0.308266	0.664602	0.154525	-0.326836	-0.0239674	-0.629705	-2.1151	0.0344211	0.308208	C4
ARTN	-0.0144289	0.0844594	-0.170839	0.864352	All	-0.179966	0.151108	0.961536	0.664602	0.127083	-0.0217106	0.227371	-0.270793	-0.170839	0.864351	0.961535	C4
ART3	0.116944	0.0659949	1.77202	0.0763996	All	-0.0124035	0.246292	0.428483	0.664602	0.0992999	0.175961	0.370589	-0.0186666	1.77202	0.0763916	0.428438	C4
ARSB	-0.209545	0.105958	-1.97762	0.0479791	All	-0.417219	-0.00187048	0.353136	0.664602	0.159431	-0.315294	-0.0028087	-0.627779	-1.97762	0.0479719	0.353083	C4
BAG3	0.102092	0.0779272	1.31009	0.190173	All	-0.0506429	0.254826	0.590932	0.664602	0.117254	0.153613	0.383431	-0.0762046	1.31009	0.190166	0.590908	C4
ADGRG1	-0.432624	0.136383	-3.17213	0.00151447	All	-0.69993	-0.165318	0.0534548	0.664602	0.20521	-0.650952	-0.24874	-1.05316	-3.17213	0.00151328	0.0534126	C4
ADAM23	0.0525902	0.0680234	0.77312	0.439456	All	-0.0807331	0.185914	0.78346	0.664602	0.102352	0.0791304	0.27974	-0.12148	0.77312	0.439452	0.783452	C4
ADAM8	0.041415	0.0558217	0.741915	0.458144	All	-0.0679936	0.150824	0.79221	0.664602	0.0839928	0.0623155	0.226941	-0.10231	0.741915	0.458139	0.79219	C4
ADAMTS13	-0.115966	0.045082	-2.57234	0.010105	All	-0.204325	-0.0276073	0.170675	0.664602	0.0678331	-0.17449	-0.0415371	-0.307443	-2.57234	0.0101013	0.170612	C4
ADAMTS15	-0.161847	0.0908316	-1.78184	0.0747837	All	-0.339874	0.0161796	0.425581	0.664602	0.136671	-0.243525	0.0243497	-0.5114	-1.78184	0.0747758	0.425531	C4
ADAMTS16	0.0553767	0.0615049	0.900363	0.367933	All	-0.0651706	0.175924	0.742643	0.664602	0.0925439	0.0833232	0.264709	-0.0980629	0.900363	0.367927	0.742631	C4
ADAMTS8	-0.0291881	0.0877481	-0.332635	0.739412	All	-0.201171	0.142795	0.912525	0.664602	0.132031	-0.0439182	0.214863	-0.302699	-0.332635	0.73941	0.912523	C4
ADCYAP1R1	0.105087	0.0659609	1.59317	0.111129	All	-0.0241937	0.234368	0.494641	0.664602	0.0992487	0.158121	0.352648	-0.0364069	1.59317	0.111121	0.494548	C4
ADGRB3	0.0554791	0.0637313	0.870516	0.384024	All	-0.0694319	0.18039	0.752813	0.664602	0.0958939	0.0834772	0.271429	-0.104475	0.870516	0.384019	0.7528	C4
ADGRE2	0.0813682	0.0549863	1.47979	0.138938	All	-0.026403	0.189139	0.528385	0.664602	0.0827357	0.122431	0.284593	-0.0397305	1.47979	0.138929	0.528353	C4
ADGRE5	0.0962234	0.059312	1.62233	0.104742	All	-0.0200259	0.212473	0.484348	0.664602	0.0892444	0.144784	0.319703	-0.0301354	1.62233	0.104733	0.484255	C4
AGXT	-0.508773	0.148663	-3.42233	0.000621521	All	-0.800147	-0.217399	0.028739	0.664602	0.223687	-0.765531	-0.327104	-1.20396	-3.42233	0.00062087	0.028704	C4
ADGRG2	0.06687	0.0529453	1.263	0.206597	All	-0.036901	0.170641	0.611008	0.664602	0.0796648	0.100617	0.25676	-0.0555263	1.263	0.206589	0.610985	C4
ADH4	-0.908052	0.167481	-5.42181	5.93556e-08	All	-1.23631	-0.579795	2.73848e-05	0.664602	0.252002	-1.36631	-0.872385	-1.86023	-5.42181	5.89983e-08	2.72199e-05	C4
ADM	-0.0326973	0.0573185	-0.57045	0.568376	All	-0.14504	0.0796449	0.844081	0.664602	0.0862449	-0.0491984	0.119842	-0.218238	-0.57045	0.568372	0.84407	C4
AFP	0.125496	0.12708	0.987529	0.32339	All	-0.123577	0.374568	0.711376	0.664602	0.191213	0.188828	0.563605	-0.185949	0.987529	0.323384	0.711363	C4
AGER	0.00645281	0.078526	0.0821741	0.934509	All	-0.147455	0.160361	0.979126	0.664602	0.118155	0.00970928	0.241293	-0.221874	0.0821741	0.934508	0.979126	C4
AGR2	-0.456614	0.188408	-2.42353	0.0153751	All	-0.825888	-0.0873399	0.211554	0.664602	0.283491	-0.687049	-0.131407	-1.24269	-2.42353	0.0153705	0.211436	C4
AGR3	0.040425	0.111844	0.36144	0.717773	All	-0.178786	0.259636	0.905098	0.664602	0.168288	0.0608259	0.39067	-0.269018	0.36144	0.717771	0.905092	C4
AGRN	-0.207434	0.0671534	-3.08896	0.00201004	All	-0.339052	-0.0758158	0.0640728	0.664602	0.101043	-0.312118	-0.114073	-0.510162	-3.08896	0.0020086	0.0640269	C4
AGRP	-0.317992	0.100695	-3.15796	0.00158999	All	-0.51535	-0.120633	0.0552417	0.664602	0.151512	-0.478469	-0.181506	-0.775433	-3.15796	0.00158875	0.0551613	C4
ADAM22	0.149167	0.0675606	2.2079	0.0272574	All	0.0167505	0.281583	0.275041	0.664602	0.101656	0.224446	0.423691	0.0252002	2.2079	0.0272515	0.274981	C4
ADAM15	0.742821	0.0580812	12.7894	2.24428e-37	All	0.628984	0.856658	1.96734e-33	0.664602	0.0873925	1.11769	1.28898	0.946404	12.7894	1.8804e-37	1.64836e-33	C4
ACAN	0.117636	0.0540896	2.17484	0.0296479	All	0.0116228	0.22365	0.287493	0.664602	0.0813864	0.177003	0.33652	0.0174854	2.17484	0.0296418	0.287433	C4
RTBDN	-0.0239549	0.0558482	-0.428929	0.667977	All	-0.133415	0.0855056	0.882468	0.664602	0.0840326	-0.036044	0.12866	-0.200748	-0.428929	0.667975	0.882462	C4
RSPO3	0.154676	0.0534288	2.89499	0.00379388	All	0.0499572	0.259394	0.0963976	0.664602	0.0803923	0.232735	0.390303	0.0751658	2.89499	0.00379174	0.0963431	C4
RSPO1	-0.00533817	0.0657515	-0.081187	0.935294	All	-0.134209	0.123532	0.97936	0.664602	0.0989337	-0.00803213	0.185878	-0.201942	-0.081187	0.935293	0.979359	C4
RRM2B	0.0333474	0.126591	0.263426	0.792224	All	-0.214767	0.281462	0.934831	0.664602	0.190477	0.0501765	0.423511	-0.323158	0.263426	0.792223	0.934827	C4
RRM2	-0.0925286	0.0962715	-0.961121	0.336497	All	-0.281217	0.0961601	0.720351	0.664602	0.144856	-0.139224	0.144694	-0.423142	-0.961121	0.336491	0.720327	C4
RP2	-0.0374427	0.0804018	-0.465694	0.641437	All	-0.195027	0.120142	0.872705	0.664602	0.120977	-0.0563385	0.180777	-0.293454	-0.465694	0.641434	0.872701	C4
AARSD1	-0.147439	0.103903	-1.41901	0.155904	All	-0.351084	0.0562066	0.549742	0.664602	0.156338	-0.221845	0.0845775	-0.528268	-1.41901	0.155896	0.549713	C4
ABHD14B	-0.0264698	0.108431	-0.244117	0.807141	All	-0.238991	0.186051	0.941133	0.664602	0.163152	-0.0398281	0.279949	-0.359605	-0.244117	0.80714	0.94113	C4
ABL1	-0.0554346	0.129475	-0.42815	0.668545	All	-0.3092	0.198331	0.88247	0.664602	0.194816	-0.0834102	0.298428	-0.465249	-0.42815	0.668542	0.882464	C4
ACAA1	-0.414742	0.155356	-2.66962	0.00759694	All	-0.719234	-0.110249	0.145722	0.664602	0.233758	-0.624046	-0.165879	-1.08221	-2.66962	0.00759373	0.14566	C4
ADA2	0.0512452	0.0811221	0.631704	0.527584	All	-0.107751	0.210241	0.825335	0.664602	0.122061	0.0771066	0.316346	-0.162133	0.631704	0.52758	0.825324	C4
ACE2	-0.348199	0.0997873	-3.48941	0.000484627	All	-0.543779	-0.15262	0.0244616	0.664602	0.150146	-0.523922	-0.229635	-0.818208	-3.48941	0.000484081	0.0244021	C4
ACOX1	0.043733	0.0951401	0.45967	0.645756	All	-0.142738	0.230204	0.874374	0.664602	0.143154	0.0658033	0.346384	-0.214778	0.45967	0.645753	0.87437	C4
ACP5	-0.181752	0.062344	-2.91531	0.00355537	All	-0.303944	-0.0595604	0.0930339	0.664602	0.0938066	-0.273476	-0.0896148	-0.457336	-2.91531	0.0035533	0.0929798	C4
ACP6	0.0541315	0.130539	0.414678	0.67838	All	-0.201719	0.309982	0.888625	0.664602	0.196416	0.0814495	0.466425	-0.303526	0.414678	0.678377	0.888622	C4
ACTA2	0.046012	0.0827426	0.556086	0.578155	All	-0.116161	0.208185	0.846802	0.664602	0.1245	0.0692325	0.313252	-0.174787	0.556086	0.578152	0.846797	C4
ACTN4	0.0722437	0.0606407	1.19134	0.233528	All	-0.04661	0.191097	0.638601	0.664602	0.0912437	0.108702	0.28754	-0.0701355	1.19134	0.233521	0.638581	C4
ACVRL1	0.0334299	0.04917	0.679884	0.496582	All	-0.0629415	0.129801	0.808964	0.664602	0.0739841	0.0503006	0.195309	-0.0947082	0.679884	0.496578	0.808958	C4
ACY1	-0.67097	0.124231	-5.40101	6.66631e-08	All	-0.914457	-0.427483	2.92184e-05	0.664602	0.186925	-1.00958	-0.643209	-1.37595	-5.40101	6.62677e-08	2.90451e-05	C4
ADA	-0.0714336	0.0681929	-1.04752	0.294865	All	-0.205089	0.062222	0.691607	0.664602	0.102607	-0.107483	0.0936267	-0.308593	-1.04752	0.294859	0.691591	C4
RTN4R	-0.16474	0.0711628	-2.31497	0.0206198	All	-0.304216	-0.0252633	0.243933	0.664602	0.107076	-0.247877	-0.0380088	-0.457746	-2.31497	0.0206145	0.243869	C4
AHCY	0.13582	0.130713	1.03907	0.298776	All	-0.120372	0.392013	0.693752	0.664602	0.196678	0.204363	0.589853	-0.181126	1.03907	0.29877	0.693734	C4
CBLIF	-0.0543718	0.140479	-0.387045	0.698725	All	-0.329706	0.220962	0.893772	0.664602	0.211373	-0.0818111	0.332481	-0.496103	-0.387045	0.698723	0.89377	C4
ANGPTL3	0.0800066	0.0672108	1.19038	0.233903	All	-0.0517241	0.211737	0.638752	0.664602	0.101129	0.120383	0.318596	-0.0778308	1.19038	0.233896	0.638732	C4
ANGPTL4	-0.0699877	0.0883187	-0.792445	0.428106	All	-0.243089	0.103114	0.778256	0.664602	0.13289	-0.105308	0.155156	-0.365772	-0.792445	0.428101	0.778236	C4
ANGPTL7	-0.879416	0.0707685	-12.4267	2.19284e-35	All	-1.01812	-0.740712	9.6112e-32	0.664602	0.106483	-1.32322	-1.11452	-1.53193	-12.4267	1.87317e-35	8.21012e-32	C4
CCL15	-0.163134	0.0837307	-1.94832	0.0513846	All	-0.327243	0.000975376	0.365089	0.664602	0.125986	-0.245461	0.00147215	-0.492394	-1.94832	0.0513773	0.365037	C4
CCL14	0.0400722	0.0761043	0.526543	0.598514	All	-0.10909	0.189234	0.856304	0.664602	0.114511	0.060295	0.284737	-0.164147	0.526543	0.598511	0.8563	C4
CCL13	0.000360538	0.132974	0.00271134	0.997837	All	-0.260265	0.260986	0.998735	0.664602	0.200081	0.000542488	0.392702	-0.391617	0.00271134	0.997837	0.998735	C4
CCL11	-0.208165	0.0730138	-2.85103	0.00436011	All	-0.351269	-0.0650602	0.104396	0.664602	0.109861	-0.313217	-0.0978895	-0.528545	-2.85103	0.00435778	0.104276	C4
CCDC80	0.117854	0.0689818	1.70848	0.0875547	All	-0.0173475	0.253056	0.453072	0.664602	0.103794	0.177331	0.380767	-0.0261059	1.70848	0.0875466	0.45303	C4
CC2D1A	-0.136126	0.14055	-0.968527	0.332787	All	-0.411599	0.139346	0.716992	0.664602	0.21148	-0.204824	0.209676	-0.619324	-0.968527	0.332781	0.716963	C4
CBLN4	0.00426991	0.0621121	0.0687452	0.945193	All	-0.117467	0.126007	0.983309	0.664602	0.0934575	0.00642476	0.189602	-0.176752	0.0687452	0.945192	0.983308	C4
CALCOCO1	-0.00409921	0.196614	-0.020849	0.983366	All	-0.389456	0.381257	0.994981	0.664602	0.295837	-0.00616792	0.573673	-0.586009	-0.020849	0.983366	0.994981	C4
CASP8	0.150867	0.119676	1.26062	0.207452	All	-0.0836945	0.385428	0.611397	0.664602	0.180072	0.227004	0.579945	-0.125938	1.26062	0.207444	0.61137	C4
CASP3	0.0874669	0.169514	0.515986	0.605868	All	-0.244775	0.419709	0.859339	0.664602	0.255061	0.131608	0.631528	-0.368312	0.515986	0.605865	0.859331	C4
CASP2	0.0854559	0.130109	0.656803	0.511311	All	-0.169553	0.340464	0.817613	0.664602	0.19577	0.128582	0.51229	-0.255126	0.656803	0.511307	0.817607	C4
CASP10	-0.00401139	0.134944	-0.0297263	0.976285	All	-0.268497	0.260474	0.993316	0.664602	0.203045	-0.00603578	0.391932	-0.404004	-0.0297263	0.976285	0.993316	C4
CASP1	-0.0895512	0.130348	-0.687014	0.492078	All	-0.345029	0.165927	0.806936	0.664602	0.19613	-0.134744	0.249671	-0.519159	-0.687014	0.492074	0.806919	C4
CARHSP1	-0.155597	0.0963559	-1.61482	0.106359	All	-0.344451	0.0332571	0.485335	0.664602	0.144983	-0.234121	0.0500458	-0.518287	-1.61482	0.106351	0.485253	C4
CAPG	0.153032	0.114929	1.33154	0.183019	All	-0.072224	0.378288	0.582388	0.664602	0.172929	0.230262	0.569202	-0.108679	1.33154	0.183012	0.582334	C4
CANT1	0.00634792	0.0389433	0.163004	0.870516	All	-0.0699795	0.0826754	0.963008	0.664602	0.0585964	0.00955146	0.1244	-0.105298	0.163004	0.870515	0.963006	C4
CAMKK1	-0.00483097	0.0836472	-0.0577541	0.953945	All	-0.168776	0.159115	0.985421	0.664602	0.125861	-0.00726897	0.239418	-0.253956	-0.0577541	0.953944	0.98542	C4
ANGPTL2	-0.20157	0.0799698	-2.52058	0.0117202	All	-0.358308	-0.0448323	0.183791	0.664602	0.120327	-0.303295	-0.0674531	-0.539136	-2.52058	0.0117162	0.183728	C4
ANGPTL1	-0.0908937	0.0552593	-1.64486	0.100008	All	-0.1992	0.0174126	0.475745	0.664602	0.0831465	-0.136764	0.0262031	-0.299731	-1.64486	0.0999993	0.475646	C4
ALPP	-0.371131	0.234417	-1.58321	0.113383	All	-0.83058	0.0883185	0.49605	0.664602	0.352718	-0.558425	0.132902	-1.24975	-1.58321	0.113374	0.495982	C4
AIF1	0.0302121	0.0988479	0.305643	0.759878	All	-0.163526	0.22395	0.921277	0.664602	0.148733	0.045459	0.336975	-0.246057	0.305643	0.759877	0.921275	C4
AIFM1	-0.228074	0.201117	-1.13404	0.256787	All	-0.622257	0.166109	0.660472	0.664602	0.302613	-0.343174	0.249948	-0.936297	-1.13404	0.25678	0.660447	C4
AK1	0.128149	0.121592	1.05392	0.291924	All	-0.110167	0.366465	0.691607	0.664602	0.182955	0.192821	0.551412	-0.165771	1.05392	0.291917	0.691591	C4
AKR1B1	0.0360913	0.139966	0.257857	0.796518	All	-0.238238	0.31042	0.93659	0.664602	0.210602	0.0543052	0.467085	-0.358474	0.257857	0.796517	0.936589	C4
AKR1C4	0.0337391	0.101682	0.33181	0.740035	All	-0.165554	0.233032	0.912525	0.664602	0.152997	0.0507658	0.350639	-0.249108	0.33181	0.740033	0.912523	C4
AKT1S1	-0.0435255	0.124041	-0.350897	0.725668	All	-0.286641	0.19959	0.908613	0.664602	0.186639	-0.065491	0.300321	-0.431303	-0.350897	0.725666	0.908611	C4
AKT3	-0.0302739	0.106727	-0.283657	0.776674	All	-0.239455	0.178907	0.928598	0.664602	0.160588	-0.0455519	0.2692	-0.360304	-0.283657	0.776673	0.928594	C4
ALCAM	0.00949518	0.0375392	0.25294	0.800316	All	-0.0640803	0.0830707	0.937705	0.664602	0.0564838	0.014287	0.124995	-0.0964211	0.25294	0.800314	0.937703	C4
ALDH1A1	-0.442857	0.104531	-4.23659	2.27468e-05	All	-0.647735	-0.237979	0.00272525	0.664602	0.157284	-0.66635	-0.358073	-0.974627	-4.23659	2.26936e-05	0.00271889	C4
ALDH3A1	-0.271812	0.128058	-2.12256	0.0337967	All	-0.522802	-0.0208224	0.306359	0.664602	0.192685	-0.408985	-0.0313237	-0.786647	-2.12256	0.0337903	0.306301	C4
ANGPT2	0.00358466	0.0753463	0.0475758	0.962055	All	-0.144091	0.151261	0.988672	0.664602	0.113371	0.0053937	0.2276	-0.216813	0.0475758	0.962054	0.988672	C4
AMBN	-0.0194711	0.0520313	-0.374219	0.708244	All	-0.121451	0.0825084	0.899218	0.664602	0.0782894	-0.0292974	0.12415	-0.182745	-0.374219	0.708242	0.899212	C4
AMBP	0.0252323	0.0394404	0.639758	0.522334	All	-0.0520695	0.102534	0.823229	0.664602	0.0593445	0.0379661	0.154281	-0.0783491	0.639758	0.52233	0.823214	C4
AMFR	-0.0871791	0.123146	-0.707934	0.478991	All	-0.32854	0.154182	0.800815	0.664602	0.185293	-0.131175	0.231999	-0.494348	-0.707934	0.478986	0.800799	C4
AMIGO2	-0.0558314	0.0437248	-1.27688	0.201652	All	-0.14153	0.0298676	0.606658	0.664602	0.065791	-0.0840074	0.044943	-0.212958	-1.27688	0.201644	0.606607	C4
AMN	-0.0590832	0.0902545	-0.654629	0.51271	All	-0.235979	0.117812	0.818571	0.664602	0.135802	-0.0889002	0.177272	-0.355073	-0.654629	0.512707	0.818558	C4
AMY2A	0.114045	0.0899337	1.2681	0.20477	All	-0.0622219	0.290312	0.609512	0.664602	0.13532	0.171599	0.436825	-0.0936277	1.2681	0.204762	0.609489	C4
AMY2B	0.152619	0.0892623	1.70979	0.0873137	All	-0.0223315	0.32757	0.452798	0.664602	0.13431	0.22964	0.492887	-0.0336062	1.70979	0.0873056	0.452707	C4
ANG	-0.160653	0.0653295	-2.45911	0.0139325	All	-0.288696	-0.0326092	0.201206	0.664602	0.0982987	-0.241728	-0.0490622	-0.434393	-2.45911	0.0139281	0.201142	C4
ANGPT1	0.00625101	0.160466	0.0389554	0.968926	All	-0.308256	0.320758	0.991665	0.664602	0.241446	0.00940564	0.482641	-0.463829	0.0389554	0.968926	0.991664	C4
AHSP	0.052239	0.158136	0.330342	0.741143	All	-0.257702	0.36218	0.913122	0.664602	0.237941	0.0786019	0.544966	-0.387762	0.330342	0.741142	0.91312	C4
FETUB	-0.0266035	0.0654661	-0.406371	0.684472	All	-0.154915	0.101708	0.889692	0.664602	0.0985043	-0.0400293	0.153039	-0.233098	-0.406371	0.68447	0.889689	C4
FIS1	-0.0606851	0.147161	-0.412373	0.680068	All	-0.349115	0.227744	0.888996	0.664602	0.221427	-0.0913104	0.342686	-0.525307	-0.412373	0.680066	0.888993	C4
FHIT	-0.094693	0.137665	-0.68785	0.491552	All	-0.364512	0.175126	0.806782	0.664602	0.207139	-0.142481	0.263512	-0.548474	-0.68785	0.491547	0.806768	C4
FGR	-0.0614531	0.113243	-0.542666	0.587363	All	-0.283405	0.160499	0.850907	0.664602	0.170392	-0.092466	0.241503	-0.426435	-0.542666	0.58736	0.850895	C4
FGFR2	-0.104721	0.0432464	-2.42149	0.0154616	All	-0.189482	-0.0199594	0.211554	0.664602	0.0650712	-0.157569	-0.0300297	-0.285109	-2.42149	0.015457	0.211436	C4
FGFBP1	0.234302	0.0618989	3.78524	0.000153793	All	0.112983	0.355622	0.0102133	0.664602	0.0931368	0.352545	0.535093	0.169997	3.78524	0.000153559	0.0101977	C4
FGF5	0.0182712	0.0626427	0.291673	0.770538	All	-0.104506	0.141049	0.926549	0.664602	0.094256	0.0274919	0.212234	-0.15725	0.291673	0.770537	0.926547	C4
FGF23	0.00667496	0.110232	0.0605537	0.951715	All	-0.209376	0.222726	0.984598	0.664602	0.165862	0.0100436	0.335133	-0.315046	0.0605537	0.951715	0.984598	C4
FGF21	-0.82753	0.240287	-3.44392	0.000573954	All	-1.29848	-0.356576	0.0271961	0.664602	0.36155	-1.24515	-0.536513	-1.95379	-3.44392	0.000573339	0.027167	C4
FGF2	-0.0766647	0.129178	-0.593483	0.552861	All	-0.329848	0.176519	0.837282	0.664602	0.194368	-0.115354	0.265608	-0.496317	-0.593483	0.552858	0.83727	C4
FGF19	-0.0416545	0.149945	-0.277799	0.781168	All	-0.335541	0.252232	0.929557	0.664602	0.225616	-0.0626759	0.379532	-0.504884	-0.277799	0.781167	0.929553	C4
FCGR3B	-0.0577286	0.094834	-0.608734	0.542705	All	-0.2436	0.128143	0.833015	0.664602	0.142693	-0.086862	0.192816	-0.36654	-0.608734	0.542701	0.833009	C4
FES	-0.031209	0.0895715	-0.348426	0.727522	All	-0.206766	0.144348	0.909155	0.664602	0.134775	-0.046959	0.217199	-0.311117	-0.348426	0.727521	0.909153	C4
FEN1	-0.0651886	0.12302	-0.529904	0.596182	All	-0.306303	0.175926	0.855284	0.664602	0.185103	-0.0980867	0.264715	-0.460888	-0.529904	0.596179	0.855274	C4
FCRLB	-0.254139	0.114799	-2.21377	0.0268506	All	-0.479141	-0.0291366	0.273222	0.664602	0.172734	-0.382393	-0.0438345	-0.720951	-2.21377	0.0268447	0.273162	C4
FCRL6	0.275756	0.13048	2.11339	0.0345735	All	0.0200196	0.531493	0.308566	0.664602	0.196328	0.414919	0.799723	0.0301157	2.11339	0.034567	0.308508	C4
FCRL5	-0.0085325	0.110792	-0.0770135	0.938613	All	-0.225681	0.208616	0.98128	0.664602	0.166705	-0.0128385	0.313903	-0.33958	-0.0770135	0.938613	0.981279	C4
FCRL3	0.116255	0.102597	1.13312	0.257172	All	-0.0848319	0.317341	0.660524	0.664602	0.154374	0.174924	0.477496	-0.127649	1.13312	0.257165	0.660505	C4
FCRL2	0.0161031	0.0945719	0.170274	0.864796	All	-0.169254	0.201461	0.961741	0.664602	0.142299	0.0242297	0.303135	-0.254675	0.170274	0.864795	0.961739	C4
FCRL1	0.155845	0.0873309	1.78453	0.0743451	All	-0.0153206	0.32701	0.425581	0.664602	0.131403	0.234494	0.492044	-0.023057	1.78453	0.0743371	0.425531	C4
FCN2	-0.197377	0.0786508	-2.50953	0.0120932	All	-0.351529	-0.0432241	0.187958	0.664602	0.118343	-0.296985	-0.0650334	-0.528937	-2.50953	0.012089	0.187895	C4
FKBP1B	0.19437	0.213731	0.909412	0.363138	All	-0.224536	0.613275	0.737893	0.664602	0.321593	0.29246	0.922782	-0.337861	0.909412	0.363133	0.737881	C4
FKBP4	-0.115273	0.0835773	-1.37923	0.167831	All	-0.279081	0.0485361	0.56576	0.664602	0.125756	-0.173446	0.0730348	-0.419927	-1.37923	0.167823	0.565701	C4
FOLR1	0.0113409	0.0550569	0.205986	0.836803	All	-0.0965686	0.11925	0.953061	0.664602	0.0828419	0.0170643	0.179434	-0.145306	0.205986	0.836802	0.95306	C4
FURIN	-0.148227	0.0710721	-2.08558	0.0370231	All	-0.287525	-0.00892795	0.317176	0.664602	0.106939	-0.223031	-0.0134297	-0.432632	-2.08558	0.0370165	0.317119	C4
FUCA1	-0.67264	0.160474	-4.19159	2.77629e-05	All	-0.987162	-0.358117	0.00312013	0.664602	0.241458	-1.01209	-0.538836	-1.48535	-4.19159	2.77006e-05	0.00311312	C4
FSTL3	-0.0439385	0.0646991	-0.679121	0.497065	All	-0.170746	0.0828694	0.809185	0.664602	0.0973502	-0.0661125	0.124694	-0.256919	-0.679121	0.497061	0.809168	C4
FST	0.00660107	0.097137	0.0679563	0.945821	All	-0.183784	0.196986	0.983309	0.664602	0.146158	0.00993238	0.296402	-0.276538	0.0679563	0.94582	0.983308	C4
FRZB	-0.0239108	0.0487317	-0.490662	0.623668	All	-0.119423	0.0716016	0.86464	0.664602	0.0733247	-0.0359776	0.107739	-0.179694	-0.490662	0.623666	0.86463	C4
FOXO3	0.118381	0.181049	0.653864	0.513203	All	-0.236468	0.47323	0.818571	0.664602	0.272417	0.178124	0.712061	-0.355813	0.653864	0.513199	0.818558	C4
FOXO1	-0.0423781	0.162308	-0.261097	0.794019	All	-0.360496	0.275739	0.935408	0.664602	0.244218	-0.0637646	0.414903	-0.542432	-0.261097	0.794018	0.935406	C4
FOSB	0.107012	0.0732592	1.46073	0.144098	All	-0.0365736	0.250597	0.533481	0.664602	0.11023	0.161016	0.377068	-0.0550349	1.46073	0.14409	0.533424	C4
FOLR3	1.48281	0.361407	4.10288	4.08883e-05	All	0.774464	2.19115	0.00407303	0.664602	0.543794	2.23112	3.29696	1.16529	4.10288	4.08038e-05	0.00406461	C4
FOLR2	0.142151	0.0574951	2.4724	0.0134252	All	0.0294627	0.25484	0.198755	0.664602	0.0865107	0.213889	0.38345	0.0443283	2.4724	0.0134208	0.198616	C4
FKBP5	-0.143006	0.1786	-0.800706	0.423307	All	-0.493056	0.207044	0.776151	0.664602	0.268733	-0.215176	0.31154	-0.741892	-0.800706	0.423302	0.776131	C4
FMR1	0.0165699	0.06614	0.250527	0.802181	All	-0.113062	0.146202	0.938594	0.664602	0.0995183	0.024932	0.219988	-0.170124	0.250527	0.80218	0.938591	C4
FMNL1	-0.01012	0.12346	-0.0819698	0.934671	All	-0.252096	0.231856	0.979126	0.664602	0.185765	-0.0152271	0.348872	-0.379326	-0.0819698	0.934671	0.979126	C4
FLT4	-0.0397385	0.0664633	-0.5979	0.54991	All	-0.170004	0.0905273	0.836676	0.664602	0.100005	-0.0597929	0.136216	-0.255802	-0.5979	0.549906	0.83667	C4
FLT3LG	-0.0894269	0.065938	-1.35623	0.175035	All	-0.218663	0.0398092	0.572527	0.664602	0.0992143	-0.134557	0.0599029	-0.329017	-1.35623	0.175027	0.572471	C4
FLT3	0.117128	0.0580984	2.01603	0.0438042	All	0.00325716	0.230999	0.34193	0.664602	0.0874184	0.176238	0.347578	0.00489778	2.01603	0.0437972	0.341875	C4
FLT1	0.00536087	0.0418167	0.128199	0.897992	All	-0.0765984	0.0873201	0.967459	0.664602	0.06292	0.00806629	0.131389	-0.115257	0.128199	0.897991	0.967457	C4
FLRT2	0.0227465	0.0544021	0.418118	0.675863	All	-0.0838796	0.129373	0.887184	0.664602	0.0818567	0.0342257	0.194665	-0.126213	0.418118	0.675861	0.887181	C4
FLI1	-0.261029	0.206487	-1.26414	0.206186	All	-0.665735	0.143678	0.610825	0.664602	0.310692	-0.39276	0.216198	-1.00172	-1.26414	0.206179	0.610802	C4
FKBP7	-0.0427133	0.0902325	-0.473369	0.635953	All	-0.219566	0.134139	0.870328	0.664602	0.135769	-0.064269	0.201839	-0.330377	-0.473369	0.63595	0.870319	C4
FUS	-0.0467498	0.074613	-0.626564	0.530949	All	-0.192989	0.099489	0.826886	0.664602	0.112267	-0.0703426	0.149701	-0.290386	-0.626564	0.530945	0.826874	C4
FCGR2B	-0.275316	0.109072	-2.52418	0.0116009	All	-0.489092	-0.0615398	0.182916	0.664602	0.164116	-0.414257	-0.0925906	-0.735924	-2.52418	0.0115969	0.182779	C4
EPHB4	0.172535	0.0478065	3.60902	0.000307754	All	0.0788355	0.266234	0.0171833	0.664602	0.0719326	0.259606	0.400594	0.118618	3.60902	0.000307361	0.0171613	C4
ERP44	-0.0795463	0.0497762	-1.59808	0.110034	All	-0.177106	0.0180133	0.492121	0.664602	0.0748963	-0.11969	0.0271066	-0.266487	-1.59808	0.110026	0.492084	C4
EREG	-0.180071	0.152422	-1.1814	0.237452	All	-0.478812	0.118671	0.641451	0.664602	0.229343	-0.270945	0.178567	-0.720457	-1.1814	0.237445	0.641431	C4
ERBIN	-0.118918	0.194998	-0.609844	0.541969	All	-0.501106	0.26327	0.832724	0.664602	0.293405	-0.178931	0.396143	-0.754005	-0.609844	0.541965	0.832718	C4
ERBB4	-0.0612303	0.0461954	-1.32546	0.185026	All	-0.151772	0.0293111	0.584903	0.664602	0.0695084	-0.0921308	0.0441058	-0.228367	-1.32546	0.185018	0.584878	C4
ERBB3	-0.00779686	0.03673	-0.212275	0.831893	All	-0.0797863	0.0641926	0.950642	0.664602	0.0552661	-0.0117316	0.09659	-0.120053	-0.212275	0.831892	0.950641	C4
ERBB2	-0.165132	0.0487148	-3.38978	0.000700202	All	-0.260612	-0.0696531	0.0308441	0.664602	0.0732993	-0.248468	-0.104802	-0.392135	-3.38978	0.000699495	0.0308129	C4
EPS8L2	-0.100306	0.0592738	-1.69226	0.0906054	All	-0.216481	0.0158681	0.458656	0.664602	0.089187	-0.150927	0.0238793	-0.325734	-1.69226	0.0905973	0.458615	C4
EPO	-0.118629	0.146043	-0.812286	0.416633	All	-0.404868	0.167611	0.771927	0.664602	0.219745	-0.178496	0.252205	-0.609197	-0.812286	0.416628	0.771907	C4
EPHX2	0.054629	0.11646	0.46908	0.639015	All	-0.173628	0.282886	0.871232	0.664602	0.175232	0.0821981	0.425654	-0.261258	0.46908	0.639012	0.871225	C4
EPHB6	0.158547	0.0597202	2.65482	0.00793831	All	0.0414971	0.275596	0.149104	0.664602	0.0898587	0.238559	0.414682	0.0624358	2.65482	0.00793501	0.148988	C4
ENPP2	-0.0372581	0.0528521	-0.704949	0.480846	All	-0.140846	0.0663302	0.801197	0.664602	0.0795245	-0.0560608	0.0998073	-0.211929	-0.704949	0.480842	0.80119	C4
EPHA2	0.159729	0.0575698	2.77453	0.00553082	All	0.0468945	0.272564	0.121208	0.664602	0.086623	0.240338	0.410119	0.0705571	2.77453	0.00552814	0.121149	C4
EPHA10	0.0872583	0.123964	0.703899	0.4815	All	-0.155707	0.330224	0.80183	0.664602	0.186524	0.131294	0.496882	-0.234293	0.703899	0.481496	0.801822	C4
EPHA1	0.0240787	0.0662584	0.363406	0.716303	All	-0.105785	0.153943	0.904772	0.664602	0.0996964	0.0362303	0.231635	-0.159175	0.363406	0.716301	0.904769	C4
EPCAM	-0.173654	0.186879	-0.92923	0.352776	All	-0.539931	0.192623	0.73263	0.664602	0.28119	-0.26129	0.289842	-0.812423	-0.92923	0.35277	0.732618	C4
ENTPD6	0.0464275	0.0526388	0.882001	0.377782	All	-0.0567427	0.149598	0.749291	0.664602	0.0792035	0.0698576	0.225097	-0.0853813	0.882001	0.377776	0.749263	C4
ENTPD5	0.0275117	0.0401207	0.685724	0.492891	All	-0.0511234	0.106147	0.807357	0.664602	0.060368	0.0413957	0.159717	-0.0769255	0.685724	0.492887	0.807343	C4
ENTPD2	-0.0655339	0.0825103	-0.794252	0.427054	All	-0.227251	0.0961832	0.777962	0.664602	0.12415	-0.0986063	0.144728	-0.34194	-0.794252	0.427049	0.777953	C4
ENPP7	-0.227864	0.164183	-1.38786	0.165188	All	-0.549657	0.0939302	0.563878	0.664602	0.24704	-0.342857	0.141342	-0.827056	-1.38786	0.16518	0.56385	C4
ENPP5	-0.00718853	0.0834283	-0.0861642	0.931336	All	-0.170705	0.156328	0.97797	0.664602	0.125531	-0.0108163	0.235225	-0.256857	-0.0861642	0.931336	0.97797	C4
ESAM	0.146796	0.0612935	2.39497	0.0166265	All	0.0266631	0.266929	0.217999	0.664602	0.0922259	0.220878	0.401641	0.0401156	2.39497	0.0166217	0.217863	C4
ESM1	0.0149991	0.0674026	0.222529	0.823903	All	-0.117108	0.147106	0.946986	0.664602	0.101418	0.0225685	0.221348	-0.176211	0.222529	0.823902	0.946985	C4
FABP6	-0.0474934	0.104463	-0.454642	0.649369	All	-0.252238	0.157251	0.875951	0.664602	0.157182	-0.0714615	0.236615	-0.379538	-0.454642	0.649367	0.875942	C4
FCER2	0.186836	0.0988211	1.89065	0.0586786	All	-0.00684964	0.380522	0.385923	0.664602	0.148692	0.281125	0.572561	-0.0103117	1.89065	0.058671	0.385797	C4
FCAR	-0.279423	0.0918112	-3.04345	0.00234039	All	-0.45937	-0.0994764	0.069722	0.664602	0.138145	-0.420437	-0.149673	-0.691201	-3.04345	0.0023388	0.0696748	C4
FBP1	-0.23669	0.142946	-1.6558	0.0977702	All	-0.51686	0.0434789	0.471259	0.664602	0.215085	-0.356139	0.0654287	-0.777706	-1.6558	0.097762	0.471213	C4
FASLG	0.201533	0.0717573	2.80854	0.00497923	All	0.0608913	0.342175	0.113011	0.664602	0.10797	0.303239	0.514861	0.0916169	2.80854	0.00497671	0.112954	C4
FAS	-0.0825097	0.0646902	-1.27546	0.202155	All	-0.2093	0.0442808	0.606879	0.664602	0.0973368	-0.124149	0.066631	-0.314929	-1.27546	0.202147	0.606856	C4
FAP	-0.0993061	0.0528966	-1.87736	0.0604758	All	-0.202981	0.00436926	0.390317	0.664602	0.0795914	-0.149422	0.00657711	-0.305421	-1.87736	0.0604682	0.390211	C4
FAM3C	-0.0250098	0.0572099	-0.437159	0.661999	All	-0.137139	0.0871195	0.880856	0.664602	0.0860814	-0.0376312	0.131088	-0.206351	-0.437159	0.661996	0.880853	C4
FAM3B	-0.110517	0.0661457	-1.6708	0.0947686	All	-0.24016	0.0191267	0.465934	0.664602	0.0995268	-0.16629	0.0287828	-0.361362	-1.6708	0.0947604	0.465847	C4
FADD	-0.057889	0.146182	-0.396005	0.692103	All	-0.344401	0.228623	0.891316	0.664602	0.219955	-0.0871033	0.344008	-0.518214	-0.396005	0.692101	0.891312	C4
FABP9	-0.12045	0.106547	-1.13048	0.25828	All	-0.329278	0.088379	0.660914	0.664602	0.160317	-0.181236	0.132986	-0.495458	-1.13048	0.258273	0.660869	C4
EZR	-0.0387267	0.0480994	-0.805138	0.420745	All	-0.133	0.0555465	0.77468	0.664602	0.0723733	-0.0582705	0.0835812	-0.200122	-0.805138	0.42074	0.774671	C4
FABP5	-0.141499	0.133996	-1.05599	0.290978	All	-0.404128	0.121129	0.691063	0.664602	0.201619	-0.212908	0.182265	-0.608082	-1.05599	0.290971	0.691047	C4
FABP4	-0.0174174	0.120238	-0.144857	0.884824	All	-0.25308	0.218245	0.964568	0.664602	0.180918	-0.0262073	0.328392	-0.380806	-0.144857	0.884823	0.964567	C4
FABP2	-0.274997	0.151837	-1.81114	0.0701277	All	-0.572591	0.0225976	0.414524	0.664602	0.228463	-0.413777	0.0340099	-0.861563	-1.81114	0.0701198	0.414466	C4
FABP1	-0.614255	0.18813	-3.26505	0.0010954	All	-0.982984	-0.245527	0.0408608	0.664602	0.283072	-0.924245	-0.369424	-1.47907	-3.26505	0.00109444	0.0408249	C4
F9	-0.0719619	0.0371453	-1.93731	0.052715	All	-0.144765	0.000841536	0.369772	0.664602	0.055891	-0.108278	0.00126824	-0.217825	-1.93731	0.0527076	0.369675	C4
F7	-0.110024	0.0596785	-1.84361	0.0652475	All	-0.226992	0.00694374	0.403898	0.664602	0.0897959	-0.165549	0.0104512	-0.341549	-1.84361	0.0652398	0.403817	C4
F3	0.135731	0.0510067	2.66104	0.00779333	All	0.0357594	0.235702	0.148125	0.664602	0.0767478	0.204229	0.354654	0.0538029	2.66104	0.00779007	0.148009	C4
F2R	-0.0604224	0.110296	-0.547819	0.58382	All	-0.276599	0.155755	0.848405	0.664602	0.165959	-0.0909153	0.234364	-0.416194	-0.547819	0.583816	0.8484	C4
F11R	-0.0851989	0.108757	-0.783388	0.433404	All	-0.298359	0.127961	0.779648	0.664602	0.163642	-0.128195	0.192544	-0.448934	-0.783388	0.4334	0.779639	C4
FCGR2A	0.192147	0.114989	1.671	0.0947302	All	-0.033228	0.417522	0.465934	0.664602	0.17302	0.289116	0.628235	-0.050003	1.671	0.094722	0.465847	C4
PTPRS	0.245956	0.047769	5.14885	2.63385e-07	All	0.15233	0.339581	8.60255e-05	0.664602	0.0718761	0.37008	0.510957	0.229202	5.14885	2.62086e-07	8.512e-05	C4
PTEN	0.125177	0.05702	2.19531	0.0281471	All	0.0134196	0.236934	0.279748	0.664602	0.0857957	0.188349	0.356508	0.0201889	2.19531	0.0281411	0.279688	C4
PTGDS	-0.0355719	0.0570689	-0.623315	0.533082	All	-0.147425	0.0762811	0.827958	0.664602	0.0858694	-0.0535236	0.11478	-0.221828	-0.623315	0.533078	0.827947	C4
PTH1R	0.0475445	0.0730836	0.650549	0.515341	All	-0.0956967	0.190786	0.819424	0.664602	0.109966	0.0715383	0.287072	-0.143995	0.650549	0.515337	0.819417	C4
PTK7	0.0300384	0.0708557	0.423938	0.671614	All	-0.108836	0.168913	0.884502	0.664602	0.106614	0.0451976	0.254161	-0.163765	0.423938	0.671611	0.884498	C4
PTN	-0.0174332	0.0948818	-0.183735	0.854222	All	-0.203398	0.168532	0.959258	0.664602	0.142765	-0.026231	0.253588	-0.30605	-0.183735	0.854221	0.959256	C4
PTPN1	-0.0694903	0.149761	-0.464009	0.642644	All	-0.363016	0.224035	0.873154	0.664602	0.225339	-0.104559	0.337105	-0.546224	-0.464009	0.642642	0.873147	C4
PTPN6	0.0271373	0.170909	0.158782	0.873842	All	-0.307839	0.362113	0.963797	0.664602	0.257161	0.0408324	0.544867	-0.463202	0.158782	0.873841	0.963795	C4
PTPRF	0.236849	0.0555864	4.26092	2.04075e-05	All	0.127902	0.345796	0.00248461	0.664602	0.0836386	0.356377	0.520309	0.192446	4.26092	2.03587e-05	0.00247867	C4
PTPRM	-0.0493534	0.0464159	-1.06329	0.287658	All	-0.140327	0.04162	0.68814	0.664602	0.0698401	-0.0742602	0.0626265	-0.211147	-1.06329	0.287651	0.688105	C4
PTPRN2	0.0957399	0.0621039	1.54161	0.123177	All	-0.0259816	0.217461	0.510021	0.664602	0.0934453	0.144056	0.327209	-0.0390968	1.54161	0.123169	0.509957	C4
RAB6B	0.0536344	0.0894667	0.59949	0.548849	All	-0.121717	0.228986	0.836284	0.664602	0.134617	0.0807016	0.344551	-0.183148	0.59949	0.548846	0.836279	C4
PTS	-0.499494	0.10716	-4.66118	3.15457e-06	All	-0.709525	-0.289464	0.000564347	0.664602	0.16124	-0.751569	-0.435539	-1.0676	-4.66118	3.14396e-06	0.000562447	C4
PTX3	-0.0359257	0.094279	-0.381057	0.703163	All	-0.220709	0.148858	0.896409	0.664602	0.141858	-0.054056	0.223986	-0.332097	-0.381057	0.703161	0.896403	C4
PVALB	-0.00271133	0.215976	-0.0125539	0.989984	All	-0.426016	0.420593	0.996807	0.664602	0.32497	-0.00407963	0.632861	-0.641021	-0.0125539	0.989984	0.996806	C4
PVR	-0.0695496	0.0708967	-0.981	0.326599	All	-0.208504	0.0694053	0.713779	0.664602	0.106675	-0.104649	0.104435	-0.313732	-0.981	0.326593	0.713765	C4
PXN	0.0476957	0.100838	0.472991	0.636222	All	-0.149944	0.245335	0.870328	0.664602	0.151728	0.0717658	0.369152	-0.22562	0.472991	0.63622	0.870319	C4
QDPR	-0.0928124	0.0827329	-1.12183	0.261941	All	-0.254966	0.0693411	0.663251	0.664602	0.124485	-0.139651	0.104339	-0.383641	-1.12183	0.261934	0.663233	C4
QPCT	0.00476031	0.0506016	0.0940742	0.925051	All	-0.0944171	0.103938	0.975947	0.664602	0.0761383	0.00716265	0.156394	-0.142068	0.0940742	0.92505	0.975946	C4
RAB37	-0.136334	0.157596	-0.865086	0.386997	All	-0.445215	0.172548	0.754158	0.664602	0.237128	-0.205136	0.259634	-0.669906	-0.865086	0.386991	0.754135	C4
RAB6A	0.07801	0.08926	0.873963	0.382144	All	-0.0969364	0.252956	0.752104	0.664602	0.134306	0.117379	0.380618	-0.145861	0.873963	0.382138	0.752093	C4
PSRC1	-0.0605238	0.112104	-0.539889	0.589277	All	-0.280244	0.159196	0.851828	0.664602	0.168679	-0.0910678	0.239543	-0.421678	-0.539889	0.589274	0.851818	C4
PSPN	0.0991222	0.188865	0.524831	0.599704	All	-0.271046	0.469291	0.857398	0.664602	0.284178	0.149145	0.706133	-0.407843	0.524831	0.599701	0.857388	C4
PRSS8	-0.171647	0.0833911	-2.05833	0.0395649	All	-0.33509	-0.00820312	0.327174	0.664602	0.125475	-0.25827	-0.0123384	-0.504202	-2.05833	0.0395582	0.327053	C4
PRELP	0.0318261	0.0442859	0.71865	0.472361	All	-0.0549727	0.118625	0.797404	0.664602	0.0666352	0.0478874	0.178492	-0.0827176	0.71865	0.472356	0.79739	C4
PRKAB1	0.11622	0.10202	1.13919	0.254631	All	-0.0837352	0.316176	0.659133	0.664602	0.153505	0.174872	0.475742	-0.125999	1.13919	0.254623	0.659111	C4
PRKAR1A	-0.00645829	0.160538	-0.0402291	0.967911	All	-0.321106	0.30819	0.991554	0.664602	0.241555	-0.00971753	0.46373	-0.483165	-0.0402291	0.96791	0.991554	C4
PRKCQ	0.200787	0.0815896	2.46094	0.0138617	All	0.0408745	0.3607	0.201179	0.664602	0.122765	0.302116	0.542735	0.0614978	2.46094	0.0138573	0.201115	C4
PRKRA	-0.102866	0.126521	-0.813036	0.416202	All	-0.350844	0.145111	0.771648	0.664602	0.190372	-0.154779	0.21835	-0.527908	-0.813036	0.416197	0.771624	C4
PRL	0.0167016	0.143064	0.116742	0.907065	All	-0.263698	0.297101	0.970613	0.664602	0.215262	0.0251302	0.447044	-0.396784	0.116742	0.907064	0.970612	C4
PROC	-0.0907158	0.0486651	-1.86408	0.0623177	All	-0.186098	0.00466603	0.394139	0.664602	0.0732244	-0.136496	0.00702344	-0.280016	-1.86408	0.06231	0.39409	C4
PROK1	-0.0726711	0.115734	-0.627917	0.530062	All	-0.299505	0.154162	0.826386	0.664602	0.17414	-0.109345	0.231968	-0.450659	-0.627917	0.530058	0.826374	C4
PRSS2	-0.285585	0.101708	-2.80789	0.00498919	All	-0.484929	-0.0862412	0.113011	0.664602	0.153036	-0.429709	-0.129758	-0.729659	-2.80789	0.00498666	0.112954	C4
PRSS27	0.058899	0.0761218	0.773746	0.439086	All	-0.090297	0.208095	0.783275	0.664602	0.114537	0.0886229	0.313116	-0.13587	0.773746	0.439081	0.783257	C4
PSMG3	-0.146454	0.0971598	-1.50735	0.131728	All	-0.336884	0.0439755	0.520519	0.664602	0.146193	-0.220364	0.0661734	-0.506901	-1.50735	0.13172	0.520448	C4
PRTFDC1	-0.000571839	0.208608	-0.00274121	0.997813	All	-0.409436	0.408292	0.998735	0.664602	0.313884	-0.000860423	0.614352	-0.616073	-0.00274121	0.997813	0.998735	C4
PRTG	-0.0792068	0.0480174	-1.64955	0.0990442	All	-0.173319	0.0149055	0.472887	0.664602	0.0722498	-0.119179	0.0224303	-0.260789	-1.64955	0.099036	0.472848	C4
PRTN3	0.0220144	0.0923637	0.238345	0.811615	All	-0.159015	0.203044	0.943317	0.664602	0.138976	0.0331242	0.305517	-0.239269	0.238345	0.811613	0.943314	C4
PSG1	-0.0287471	0.220093	-0.130614	0.896082	All	-0.460121	0.402627	0.967459	0.664602	0.331165	-0.0432546	0.605828	-0.692337	-0.130614	0.896081	0.967457	C4
PSIP1	0.0183899	0.124651	0.147531	0.882714	All	-0.225922	0.262701	0.964486	0.664602	0.187557	0.0276705	0.395283	-0.339942	0.147531	0.882713	0.964484	C4
PSMA1	-0.0290582	0.086668	-0.335281	0.737415	All	-0.198924	0.140808	0.912148	0.664602	0.130406	-0.0437227	0.211873	-0.299318	-0.335281	0.737413	0.912143	C4
PSMD9	-0.143555	0.104498	-1.37376	0.169523	All	-0.348367	0.0612567	0.56722	0.664602	0.157234	-0.216002	0.0921762	-0.52418	-1.37376	0.169515	0.567188	C4
PSME1	-0.0605619	0.0707166	-0.856402	0.391781	All	-0.199164	0.0780402	0.756187	0.664602	0.106405	-0.0911251	0.117428	-0.299678	-0.856402	0.391775	0.756164	C4
PSME2	-0.0785917	0.0690591	-1.13804	0.255112	All	-0.213945	0.0567615	0.659256	0.664602	0.10391	-0.118254	0.0854106	-0.321918	-1.13804	0.255105	0.659235	C4
PREB	0.0240413	0.0554545	0.433531	0.664631	All	-0.0846476	0.13273	0.882382	0.664602	0.0834403	0.036174	0.199717	-0.127369	0.433531	0.664629	0.882374	C4
RABEPK	-0.115541	0.111886	-1.03267	0.301766	All	-0.334834	0.103752	0.695634	0.664602	0.168351	-0.17385	0.156117	-0.503818	-1.03267	0.30176	0.695616	C4
GAS6	0.0452726	0.0489368	0.925125	0.354907	All	-0.0506417	0.141187	0.733671	0.664602	0.0736332	0.06812	0.212441	-0.0762011	0.925125	0.354901	0.733648	C4
RNASE3	0.0272213	0.214742	0.126763	0.899129	All	-0.393664	0.448107	0.968156	0.664602	0.323113	0.0409588	0.674261	-0.592343	0.126763	0.899128	0.968156	C4
RNASET2	0.0814188	0.0515993	1.5779	0.114596	All	-0.019714	0.182552	0.498018	0.664602	0.0776395	0.122508	0.274681	-0.0296657	1.5779	0.114588	0.49794	C4
RNF41	-0.0283137	0.125855	-0.224972	0.822003	All	-0.274984	0.218357	0.946496	0.664602	0.189369	-0.0426026	0.32856	-0.413765	-0.224972	0.822001	0.946495	C4
ROBO1	-0.0802791	0.0469588	-1.70957	0.0873545	All	-0.172317	0.0117584	0.452798	0.664602	0.0706571	-0.120793	0.017695	-0.259281	-1.70957	0.0873463	0.452707	C4
ROBO2	-0.0120847	0.0445033	-0.271546	0.785972	All	-0.0993096	0.0751402	0.931059	0.664602	0.0669624	-0.0181834	0.113063	-0.14943	-0.271546	0.785971	0.931057	C4
ROR1	0.227034	0.0601947	3.77166	0.000162407	All	0.109055	0.345014	0.0105594	0.664602	0.0905726	0.34161	0.519132	0.164087	3.77166	0.000162163	0.0105298	C4
GCNT1	-0.0189553	0.0661272	-0.286649	0.774383	All	-0.148562	0.110652	0.928186	0.664602	0.099499	-0.0285213	0.166497	-0.223539	-0.286649	0.774381	0.928182	C4
GCG	-1.03791	0.23823	-4.35677	1.32342e-05	All	-1.50483	-0.570989	0.00184145	0.664602	0.358455	-1.5617	-0.859132	-2.26427	-4.35677	1.31999e-05	0.00183667	C4
GBP4	0.144005	0.0915128	1.5736	0.115587	All	-0.0353569	0.323367	0.499242	0.664602	0.137696	0.216678	0.486562	-0.0532051	1.5736	0.115579	0.499151	C4
GBP2	0.172881	0.112503	1.53669	0.124378	All	-0.0476198	0.393382	0.510201	0.664602	0.169278	0.260127	0.591912	-0.0716577	1.53669	0.12437	0.510167	C4
FUT3_FUT5	-0.0833269	0.0883147	-0.943523	0.34542	All	-0.256421	0.0897668	0.726242	0.664602	0.132884	-0.125379	0.135073	-0.385831	-0.943523	0.345414	0.72621	C4
GALNT7	-0.0725268	0.0396878	-1.82743	0.0676427	All	-0.150314	0.00525993	0.407861	0.664602	0.0597167	-0.109128	0.00791656	-0.226173	-1.82743	0.0676349	0.407773	C4
GALNT3	-0.115384	0.0802799	-1.43727	0.150649	All	-0.27273	0.0419616	0.542824	0.664602	0.120794	-0.173614	0.0631423	-0.41037	-1.43727	0.15064	0.542751	C4
GALNT2	-0.0816843	0.0496916	-1.64382	0.100221	All	-0.179078	0.0157095	0.476428	0.664602	0.074769	-0.122907	0.0236401	-0.269454	-1.64382	0.100212	0.476389	C4
GALNT10	-0.0911733	0.0533088	-1.71029	0.0872208	All	-0.195657	0.0133099	0.45268	0.664602	0.0802116	-0.137185	0.0200298	-0.2944	-1.71029	0.0872126	0.452638	C4
GAL	0.369937	0.126718	2.91936	0.00350955	All	0.121573	0.618301	0.0921099	0.664602	0.190668	0.55663	0.930339	0.18292	2.91936	0.0035075	0.0920562	C4
FYB1	-0.0756151	0.176057	-0.429492	0.667568	All	-0.420681	0.26945	0.882468	0.664602	0.264906	-0.113775	0.405441	-0.632991	-0.429492	0.667565	0.882462	C4
FXYD5	0.0551279	0.122807	0.4489	0.653506	All	-0.185569	0.295824	0.877067	0.664602	0.184782	0.0829488	0.445122	-0.279224	0.4489	0.653504	0.877064	C4
FXN	-0.0655731	0.141102	-0.464721	0.642134	All	-0.342128	0.210982	0.872957	0.664602	0.212311	-0.0986653	0.317464	-0.514795	-0.464721	0.642131	0.872954	C4
FUT8	-0.00374555	0.109963	-0.034062	0.972828	All	-0.219269	0.211778	0.992183	0.664602	0.165457	-0.00563579	0.318659	-0.329931	-0.034062	0.972828	0.992182	C4
RILP	-0.0494878	0.114029	-0.433995	0.664295	All	-0.27298	0.174004	0.882301	0.664602	0.171574	-0.0744623	0.261823	-0.410748	-0.433995	0.664292	0.882294	C4
RHOC	-0.0884221	0.220347	-0.401285	0.688213	All	-0.520295	0.343451	0.890238	0.664602	0.331548	-0.133045	0.516789	-0.782879	-0.401285	0.688211	0.890235	C4
REG1A	-0.165856	0.0936691	-1.77066	0.0766253	All	-0.349444	0.017732	0.429026	0.664602	0.14094	-0.249557	0.0266857	-0.5258	-1.77066	0.0766173	0.428913	C4
RAD23B	-0.0585178	0.0867064	-0.674896	0.499746	All	-0.228459	0.111424	0.810804	0.664602	0.130464	-0.0880494	0.167659	-0.343758	-0.674896	0.499742	0.810797	C4
RANGAP1	0.168948	0.0923497	1.82944	0.0673414	All	-0.0120538	0.34995	0.407114	0.664602	0.138955	0.25421	0.526562	-0.0181419	1.82944	0.0673336	0.407066	C4
RARRES1	0.0411271	0.0620072	0.663264	0.507165	All	-0.0804047	0.162659	0.816286	0.664602	0.0932997	0.0618823	0.24475	-0.120985	0.663264	0.507161	0.816269	C4
RARRES2	-0.201388	0.0983415	-2.04785	0.0405819	All	-0.394134	-0.00864243	0.330308	0.664602	0.147971	-0.303021	-0.0129986	-0.593043	-2.04785	0.0405751	0.330252	C4
RASA1	-0.0151375	0.061942	-0.244383	0.806936	All	-0.136542	0.106267	0.941133	0.664602	0.0932017	-0.0227769	0.159898	-0.205452	-0.244383	0.806935	0.94113	C4
RASSF2	0.0541348	0.109281	0.495374	0.620339	All	-0.160051	0.268321	0.863129	0.664602	0.16443	0.0814545	0.403738	-0.240829	0.495374	0.620336	0.86312	C4
RBKS	-0.245493	0.0950897	-2.5817	0.00983518	All	-0.431866	-0.0591208	0.167408	0.664602	0.143078	-0.369384	-0.0889515	-0.649816	-2.5817	0.00983149	0.167345	C4
RBP2	-0.299715	0.148408	-2.01953	0.0434386	All	-0.590589	-0.00884081	0.340898	0.664602	0.223303	-0.450969	-0.0132944	-0.888644	-2.01953	0.0434316	0.340843	C4
RBP5	-0.373447	0.114146	-3.27165	0.00107015	All	-0.597169	-0.149724	0.0400894	0.664602	0.171751	-0.561911	-0.225278	-0.898543	-3.27165	0.0010692	0.0400539	C4
RCOR1	0.100179	0.0866426	1.15623	0.247595	All	-0.0696379	0.269995	0.653631	0.664602	0.130368	0.150735	0.406256	-0.104786	1.15623	0.247588	0.65359	C4
RGS8	0.173163	0.122545	1.41305	0.15765	All	-0.067022	0.413347	0.551918	0.664602	0.184389	0.260551	0.621954	-0.100852	1.41305	0.157641	0.551865	C4
REG1B	-0.139442	0.10958	-1.27251	0.203199	All	-0.354214	0.0753308	0.608209	0.664602	0.164881	-0.209813	0.113353	-0.532978	-1.27251	0.203191	0.608165	C4
REG3A	-0.157619	0.120085	-1.31257	0.189337	All	-0.392981	0.0777425	0.59086	0.664602	0.180687	-0.237163	0.116983	-0.591309	-1.31257	0.189329	0.590836	C4
REG4	-0.208354	0.0941273	-2.21353	0.0268671	All	-0.39284	-0.0238674	0.273222	0.664602	0.14163	-0.313501	-0.0359072	-0.591096	-2.21353	0.0268612	0.273162	C4
RELT	0.0753261	0.05512	1.36658	0.171764	All	-0.0327071	0.183359	0.569305	0.664602	0.0829369	0.11334	0.275896	-0.0492161	1.36658	0.171756	0.569238	C4
REN	-0.356774	0.14644	-2.43631	0.0148424	All	-0.643792	-0.0697566	0.209178	0.664602	0.220343	-0.536824	-0.104952	-0.968697	-2.43631	0.0148379	0.209114	C4
RET	-0.319628	0.0770937	-4.14596	3.39119e-05	All	-0.470728	-0.168527	0.00358159	0.664602	0.116	-0.480931	-0.253571	-0.708291	-4.14596	3.3839e-05	0.00357389	C4
RETN	0.0149579	0.0807757	0.185179	0.85309	All	-0.143359	0.173275	0.958763	0.664602	0.12154	0.0225066	0.260725	-0.215712	0.185179	0.853089	0.958762	C4
RGMA	-0.00587699	0.0610092	-0.0963297	0.923259	All	-0.125453	0.113699	0.975947	0.664602	0.0917981	-0.00884288	0.171081	-0.188767	-0.0963297	0.923259	0.975946	C4
RGMB	0.0585181	0.0511377	1.14432	0.252497	All	-0.04171	0.158746	0.657767	0.664602	0.0769449	0.0880498	0.238862	-0.0627621	1.14432	0.25249	0.657748	C4
RABGAP1L	-0.0853177	0.113282	-0.753142	0.451369	All	-0.307347	0.136712	0.788592	0.664602	0.170452	-0.128374	0.205711	-0.462459	-0.753142	0.451365	0.788575	C4
ENO2	-0.0792178	0.125663	-0.630398	0.528438	All	-0.325513	0.167078	0.825661	0.664602	0.18908	-0.119196	0.251402	-0.489794	-0.630398	0.528434	0.825648	C4
CST3	0.0134797	0.0565631	0.238312	0.81164	All	-0.097382	0.124341	0.943317	0.664602	0.0851083	0.0202824	0.187095	-0.14653	0.238312	0.811639	0.943314	C4
SH2B3	-0.168285	0.182883	-0.920179	0.357485	All	-0.526728	0.190159	0.734573	0.664602	0.275176	-0.253211	0.286134	-0.792557	-0.920179	0.357479	0.73456	C4
SFTPD	-0.304176	0.129183	-2.3546	0.0185474	All	-0.55737	-0.050981	0.231875	0.664602	0.194377	-0.457681	-0.0767021	-0.83866	-2.3546	0.0185424	0.231758	C4
SFTPA2	-0.0587991	0.0997355	-0.58955	0.555496	All	-0.254277	0.136679	0.837282	0.664602	0.150068	-0.0884727	0.205661	-0.382606	-0.58955	0.555492	0.83727	C4
SFTPA1	-0.0939564	0.107998	-0.869982	0.384316	All	-0.305629	0.117716	0.752813	0.664602	0.162501	-0.141373	0.177129	-0.459874	-0.869982	0.38431	0.7528	C4
SFRP1	-0.185671	0.0845361	-2.19635	0.028073	All	-0.351358	-0.019983	0.279328	0.664602	0.127198	-0.279371	-0.030063	-0.52868	-2.19635	0.0280671	0.279269	C4
CTF1	0.244994	0.158852	1.54228	0.123014	All	-0.06635	0.556338	0.510021	0.664602	0.239018	0.368633	0.837108	-0.0998428	1.54228	0.123006	0.509957	C4
CSTB	-0.0111238	0.084132	-0.132218	0.894813	All	-0.17602	0.153772	0.967131	0.664602	0.12659	-0.0167375	0.231379	-0.264854	-0.132218	0.894812	0.967129	C4
CST7	-0.261592	0.177929	-1.47021	0.141514	All	-0.610326	0.0871417	0.530815	0.664602	0.267722	-0.393608	0.131128	-0.918344	-1.47021	0.141505	0.530748	C4
CST6	0.172422	0.0900091	1.9156	0.0554229	All	-0.00399276	0.348836	0.378873	0.664602	0.135433	0.259436	0.524885	-0.00601263	1.9156	0.0554155	0.378763	C4
CST5	-0.135206	0.104338	-1.29585	0.195034	All	-0.339704	0.0692918	0.598205	0.664602	0.156993	-0.203439	0.104266	-0.511145	-1.29585	0.195026	0.598181	C4
CRISP2	0.0219522	0.112183	0.195682	0.84486	All	-0.197922	0.241826	0.955761	0.664602	0.168797	0.0330305	0.363872	-0.297811	0.195682	0.844859	0.955759	C4
CSF3	0.120254	0.0914666	1.31473	0.188608	All	-0.0590172	0.299525	0.590267	0.664602	0.137626	0.180941	0.450689	-0.0888058	1.31473	0.1886	0.590242	C4
CSF2RA	0.14236	0.117408	1.21252	0.225319	All	-0.0877552	0.372475	0.628902	0.664602	0.176659	0.214203	0.560455	-0.132048	1.21252	0.225312	0.628881	C4
CSF1	-0.0723628	0.0534052	-1.35498	0.175433	All	-0.177035	0.0323094	0.572527	0.664602	0.0803567	-0.108882	0.0486176	-0.266381	-1.35498	0.175425	0.572471	C4
CRX	0.122207	0.201869	0.605381	0.54493	All	-0.273448	0.517863	0.834093	0.664602	0.303744	0.183881	0.779218	-0.411457	0.605381	0.544926	0.834088	C4
CRTAM	0.151576	0.096539	1.5701	0.116401	All	-0.0376373	0.340789	0.501017	0.664602	0.145258	0.22807	0.512776	-0.0566366	1.5701	0.116392	0.500939	C4
CRTAC1	0.0114569	0.0585206	0.195775	0.844787	All	-0.103241	0.126155	0.955761	0.664602	0.0880536	0.0172387	0.189824	-0.155346	0.195775	0.844786	0.955759	C4
CRNN	-0.0727098	0.1252	-0.580748	0.561414	All	-0.318098	0.172678	0.840108	0.664602	0.188384	-0.109404	0.259829	-0.478636	-0.580748	0.56141	0.840103	C4
CRLF1	-0.163668	0.0503271	-3.25208	0.00114663	All	-0.262307	-0.0650284	0.0425905	0.664602	0.0757251	-0.246264	-0.0978429	-0.394685	-3.25208	0.00114564	0.0425537	C4
CRKL	-0.0464176	0.202168	-0.229599	0.818404	All	-0.442659	0.349824	0.94564	0.664602	0.304194	-0.0698427	0.526377	-0.666062	-0.229599	0.818403	0.945638	C4
SH2D1A	0.234045	0.110494	2.11817	0.0341667	All	0.0174813	0.450609	0.3075	0.664602	0.166256	0.352159	0.67802	0.0262975	2.11817	0.0341603	0.307442	C4
SHMT1	-0.354344	0.16549	-2.14118	0.0322654	All	-0.678697	-0.0299902	0.301534	0.664602	0.249006	-0.533167	-0.0451161	-1.02122	-2.14118	0.0322591	0.301475	C4
SIRT2	-0.233561	0.168102	-1.3894	0.164719	All	-0.563035	0.0959131	0.563298	0.664602	0.252937	-0.35143	0.144326	-0.847186	-1.3894	0.164711	0.563238	C4
CTSO	-0.26158	0.0605113	-4.32282	1.54436e-05	All	-0.38018	-0.14298	0.002042	0.664602	0.091049	-0.393588	-0.215132	-0.572045	-4.32282	1.54047e-05	0.00203239	C4
CTSL	-0.0459337	0.0464078	-0.989785	0.322285	All	-0.136891	0.0450238	0.710222	0.664602	0.0698279	-0.0691147	0.0677481	-0.205977	-0.989785	0.322279	0.710187	C4
CTSH	0.133341	0.138296	0.964172	0.334966	All	-0.137714	0.404397	0.719313	0.664602	0.208089	0.200633	0.608487	-0.207221	0.964172	0.33496	0.719285	C4
CTSF	-0.0527138	0.0773032	-0.68191	0.4953	All	-0.204225	0.0987976	0.807745	0.664602	0.116315	-0.0793164	0.148661	-0.307294	-0.68191	0.495296	0.807737	C4
CTSD	-0.302275	0.0757173	-3.99216	6.55964e-05	All	-0.450679	-0.153872	0.00605282	0.664602	0.113929	-0.454822	-0.231522	-0.678122	-3.99216	6.5474e-05	0.00604152	C4
CTSC	0.00815316	0.0840896	0.096958	0.92276	All	-0.156659	0.172966	0.975947	0.664602	0.126526	0.0122677	0.260259	-0.235724	0.096958	0.92276	0.975946	C4
CTSB	0.140027	0.10315	1.35751	0.174626	All	-0.0621425	0.342196	0.572527	0.664602	0.155205	0.210693	0.514895	-0.0935089	1.35751	0.174618	0.572471	C4
CTRC	-0.114451	0.121082	-0.94523	0.344547	All	-0.351768	0.122866	0.725685	0.664602	0.182188	-0.17221	0.184879	-0.529298	-0.94523	0.344541	0.725673	C4
CTRB1	-0.292499	0.10537	-2.77594	0.00550694	All	-0.49902	-0.0859789	0.120987	0.664602	0.158545	-0.440112	-0.129363	-0.750861	-2.77594	0.00550426	0.120928	C4
SIRT5	0.371444	0.102366	3.62859	0.000285344	All	0.170811	0.572078	0.0162424	0.664602	0.154026	0.558898	0.860789	0.257007	3.62859	0.000284972	0.0162212	C4
SIAE	-0.0286137	0.0897612	-0.318776	0.749898	All	-0.204542	0.147315	0.917138	0.664602	0.13506	-0.0430539	0.221664	-0.307772	-0.318776	0.749896	0.917133	C4
SIRPB1	0.111438	0.0883907	1.26074	0.207411	All	-0.0618051	0.28468	0.611397	0.664602	0.132998	0.167676	0.428352	-0.0930004	1.26074	0.207403	0.61137	C4
SIRPA	-0.00445011	0.110627	-0.0402262	0.967913	All	-0.221276	0.212375	0.991554	0.664602	0.166456	-0.00669591	0.319559	-0.332951	-0.0402262	0.967913	0.991554	C4
SIGLEC9	-0.0219037	0.0565327	-0.387452	0.698424	All	-0.132706	0.0888983	0.893772	0.664602	0.0850625	-0.0329576	0.133765	-0.19968	-0.387452	0.698421	0.89377	C4
SIGLEC7	-0.0183853	0.0549821	-0.334386	0.73809	All	-0.126148	0.0893777	0.912148	0.664602	0.0827294	-0.0276636	0.134486	-0.189813	-0.334386	0.738088	0.912143	C4
SIGLEC6	0.137319	0.0647197	2.12175	0.0338652	All	0.0104707	0.264167	0.306359	0.664602	0.0973811	0.206618	0.397485	0.0157514	2.12175	0.0338587	0.306301	C4
SIGLEC5	0.131435	0.220427	0.596273	0.550996	All	-0.300594	0.563464	0.836676	0.664602	0.331668	0.197765	0.847833	-0.452304	0.596273	0.550993	0.83667	C4
SIGLEC15	0.12551	0.146306	0.85786	0.390975	All	-0.161244	0.412264	0.756187	0.664602	0.22014	0.18885	0.620325	-0.242625	0.85786	0.39097	0.756164	C4
SIGLEC10	0.00454122	0.0654013	0.0694362	0.944643	All	-0.123643	0.132725	0.983079	0.664602	0.0984067	0.00683299	0.19971	-0.186044	0.0694362	0.944642	0.983078	C4
SIGLEC1	-0.004047	0.0829714	-0.0487759	0.961098	All	-0.166668	0.158574	0.988528	0.664602	0.124844	-0.00608936	0.238604	-0.250783	-0.0487759	0.961098	0.988528	C4
CTSS	-0.0723876	0.0380587	-1.902	0.0571786	All	-0.146981	0.00220602	0.384083	0.664602	0.0572654	-0.108919	0.00332137	-0.221159	-1.902	0.0571711	0.384032	C4
CRIP2	-0.0822232	0.0715752	-1.14877	0.250659	All	-0.222508	0.0580616	0.656438	0.664602	0.107696	-0.123718	0.0873669	-0.334803	-1.14877	0.250652	0.65642	C4
CNST	0.117576	0.207442	0.56679	0.57086	All	-0.289002	0.524154	0.844736	0.664602	0.312129	0.176912	0.788685	-0.434861	0.56679	0.570857	0.844725	C4
COL6A3	0.0463092	0.0717474	0.645448	0.518641	All	-0.0943131	0.186931	0.820976	0.664602	0.107955	0.0696796	0.281272	-0.141913	0.645448	0.518637	0.820963	C4
COL4A1	-0.0244219	0.0776194	-0.314636	0.75304	All	-0.176553	0.127709	0.918549	0.664602	0.116791	-0.0367466	0.192163	-0.265657	-0.314636	0.753038	0.918546	C4
COL1A1	0.0547243	0.048004	1.13999	0.254296	All	-0.0393618	0.14881	0.659133	0.664602	0.0722297	0.0823414	0.223912	-0.0592287	1.13999	0.254289	0.659111	C4
COL18A1	-0.0350472	0.0455663	-0.769148	0.44181	All	-0.124356	0.054261	0.785351	0.664602	0.0685618	-0.0527342	0.0816469	-0.187115	-0.769148	0.441805	0.785335	C4
CNTNAP2	-0.0254521	0.0786066	-0.323791	0.746098	All	-0.179518	0.128614	0.915367	0.664602	0.118276	-0.0382967	0.193525	-0.270118	-0.323791	0.746097	0.915365	C4
CNTN5	-0.0727899	0.0726713	-1.00163	0.316527	All	-0.215223	0.0696432	0.707105	0.664602	0.109346	-0.109524	0.104793	-0.323842	-1.00163	0.316521	0.707091	C4
CNTN4	0.0165001	0.0459468	0.359112	0.719513	All	-0.0735541	0.106554	0.905564	0.664602	0.0691344	0.024827	0.16033	-0.110676	0.359112	0.719511	0.905561	C4
CNTN3	-0.253291	0.0632937	-4.00184	6.29702e-05	All	-0.377345	-0.129238	0.0058723	0.664602	0.0952355	-0.381117	-0.194456	-0.567779	-4.00184	6.28516e-05	0.00586124	C4
CNTN2	0.0154325	0.0858185	0.179827	0.857289	All	-0.152769	0.183634	0.959572	0.664602	0.129128	0.0232206	0.276311	-0.22987	0.179827	0.857289	0.95957	C4
CNTN1	0.109726	0.0532409	2.06094	0.0393154	All	0.00537615	0.214077	0.326671	0.664602	0.0801095	0.165101	0.322116	0.0080864	2.06094	0.0393086	0.326615	C4
CLPP	-0.268443	0.181885	-1.47589	0.139981	All	-0.624931	0.0880454	0.528843	0.664602	0.273675	-0.403915	0.132488	-0.940319	-1.47589	0.139973	0.528764	C4
CNPY4	-0.0769577	0.143248	-0.537234	0.591109	All	-0.357719	0.203803	0.852568	0.664602	0.21554	-0.115795	0.306663	-0.538253	-0.537234	0.591106	0.852563	C4
CNPY2	0.045188	0.11574	0.390425	0.696224	All	-0.181659	0.272035	0.892788	0.664602	0.17415	0.0679925	0.409326	-0.273341	0.390425	0.696222	0.892786	C4
CNDP1	-0.205417	0.0880334	-2.3334	0.0196325	All	-0.377959	-0.0328746	0.239358	0.664602	0.13246	-0.309083	-0.0494604	-0.568705	-2.3334	0.0196273	0.239295	C4
CLUL1	0.225208	0.0876238	2.57016	0.0101688	All	0.053468	0.396947	0.171056	0.664602	0.131844	0.338861	0.597275	0.0804465	2.57016	0.010165	0.170919	C4
CLTA	-0.0452075	0.0886279	-0.510082	0.609997	All	-0.218915	0.1285	0.860098	0.664602	0.133355	-0.068022	0.193354	-0.329397	-0.510082	0.609994	0.860094	C4
CLSTN2	-0.0584583	0.0762864	-0.7663	0.443502	All	-0.207977	0.0910603	0.786355	0.664602	0.114785	-0.0879599	0.137019	-0.312939	-0.7663	0.443498	0.786347	C4
CLSTN1	-0.103226	0.0969838	-1.06436	0.287172	All	-0.293311	0.086859	0.6878	0.664602	0.145928	-0.15532	0.130699	-0.441338	-1.06436	0.287165	0.687784	C4
CLSPN	-0.00847926	0.06606	-0.128357	0.897867	All	-0.137954	0.120996	0.967459	0.664602	0.0993979	-0.0127584	0.182061	-0.207578	-0.128357	0.897866	0.967457	C4
CLPS	-0.135748	0.134342	-1.01047	0.312278	All	-0.399053	0.127557	0.703635	0.664602	0.202139	-0.204255	0.191938	-0.600447	-1.01047	0.312272	0.703618	C4
COL9A1	0.093135	0.0871277	1.06895	0.2851	All	-0.0776321	0.263902	0.685647	0.664602	0.131098	0.140137	0.397088	-0.116815	1.06895	0.285093	0.685631	C4
COLEC12	0.030959	0.0529132	0.585091	0.55849	All	-0.072749	0.134667	0.838803	0.664602	0.0796164	0.0465828	0.202631	-0.109465	0.585091	0.558487	0.838792	C4
CPPED1	-0.0783321	0.127824	-0.612815	0.540003	All	-0.328862	0.172197	0.831491	0.664602	0.192331	-0.117863	0.259106	-0.494832	-0.612815	0.539999	0.831484	C4
CRHR1	0.0167588	0.116256	0.144154	0.88538	All	-0.2111	0.244617	0.964568	0.664602	0.174926	0.0252163	0.368072	-0.31764	0.144154	0.885379	0.964567	C4
CRHBP	-0.142217	0.0547501	-2.59757	0.00939209	All	-0.249526	-0.0349092	0.163355	0.664602	0.0823803	-0.213989	-0.0525235	-0.375454	-2.59757	0.00938849	0.163246	C4
CRH	-0.0762959	0.163107	-0.467767	0.639954	All	-0.395979	0.243387	0.871905	0.664602	0.24542	-0.114799	0.366224	-0.595823	-0.467767	0.639951	0.871901	C4
CRELD2	-0.00244058	0.100565	-0.0242686	0.980638	All	-0.199545	0.194664	0.994404	0.664602	0.151317	-0.00367225	0.292908	-0.300253	-0.0242686	0.980638	0.994404	C4
CREG1	-0.335908	0.0742047	-4.52678	6.00698e-06	All	-0.481347	-0.19047	0.000957404	0.664602	0.111653	-0.505428	-0.286588	-0.724267	-4.52678	5.98894e-06	0.000954528	C4
CRADD	-0.120612	0.142975	-0.843585	0.398906	All	-0.400838	0.159614	0.761338	0.664602	0.215129	-0.18148	0.240173	-0.603133	-0.843585	0.398901	0.761325	C4
CRACR2A	0.0536924	0.160338	0.33487	0.737725	All	-0.260565	0.36795	0.912148	0.664602	0.241255	0.0807888	0.553648	-0.39207	0.33487	0.737723	0.912143	C4
CR2	0.0765777	0.0903224	0.847826	0.39654	All	-0.100451	0.253606	0.759178	0.664602	0.135905	0.115223	0.381596	-0.15115	0.847826	0.396535	0.759152	C4
CPXM1	-0.0531095	0.132148	-0.401894	0.687764	All	-0.312115	0.205896	0.889881	0.664602	0.198838	-0.0799118	0.309811	-0.469634	-0.401894	0.687762	0.889878	C4
CPVL	0.0381406	0.0794432	0.480099	0.63116	All	-0.117565	0.193846	0.867746	0.664602	0.119535	0.0573887	0.291677	-0.1769	0.480099	0.631157	0.867742	C4
COMP	-0.0331036	0.064357	-0.514374	0.606993	All	-0.159241	0.0930338	0.859339	0.664602	0.0968355	-0.0498097	0.139988	-0.239607	-0.514374	0.60699	0.859331	C4
CPM	-0.282492	0.0713816	-3.95748	7.58803e-05	All	-0.422397	-0.142586	0.00658581	0.664602	0.107405	-0.425054	-0.21454	-0.635568	-3.95748	7.57433e-05	0.00657391	C4
CPE	0.117065	0.074698	1.56718	0.117081	All	-0.0293403	0.263471	0.501995	0.664602	0.112395	0.176143	0.396438	-0.0441512	1.56718	0.117073	0.501954	C4
CPB1	-0.240218	0.113046	-2.12495	0.0335972	All	-0.461784	-0.018651	0.305829	0.664602	0.170096	-0.361446	-0.0280573	-0.694835	-2.12495	0.0335908	0.305771	C4
CPA2	-0.137451	0.125975	-1.0911	0.275237	All	-0.384359	0.109456	0.676213	0.664602	0.18955	-0.206818	0.164701	-0.578336	-1.0911	0.27523	0.676196	C4
CPA1	-0.23422	0.116056	-2.01817	0.0435802	All	-0.461685	-0.00675552	0.341093	0.664602	0.174624	-0.352422	-0.0101585	-0.694685	-2.01817	0.0435732	0.341038	C4
COX5B	-0.161124	0.132545	-1.21561	0.22414	All	-0.420907	0.0986601	0.627838	0.664602	0.199435	-0.242436	0.148457	-0.63333	-1.21561	0.224132	0.627799	C4
CORO1A	0.272744	0.170571	1.59901	0.109827	All	-0.0615683	0.607057	0.491655	0.664602	0.256651	0.410388	0.913424	-0.0926486	1.59901	0.109818	0.491575	C4
COPE	-0.146487	0.0887769	-1.65006	0.0989396	All	-0.320486	0.0275126	0.472645	0.664602	0.133579	-0.220413	0.041402	-0.482228	-1.65006	0.0989314	0.472606	C4
COMT	0.0590651	0.156621	0.37712	0.706086	All	-0.247907	0.366037	0.898078	0.664602	0.235662	0.0888729	0.55077	-0.373024	0.37712	0.706084	0.898075	C4
CRIM1	0.0311821	0.0390103	0.799329	0.424105	All	-0.0452767	0.107641	0.776787	0.664602	0.0586973	0.0469184	0.161965	-0.0681282	0.799329	0.4241	0.776778	C4
DPP4	-0.123092	0.0536456	-2.29455	0.0217646	All	-0.228236	-0.0179488	0.253025	0.664602	0.0807184	-0.185212	-0.0270039	-0.34342	-2.29455	0.0217592	0.252908	C4
DSG4	-0.0710157	0.0937299	-0.757663	0.448657	All	-0.254723	0.112692	0.787531	0.664602	0.141032	-0.106855	0.169568	-0.383277	-0.757663	0.448653	0.787523	C4
DSG3	0.0537288	0.0653899	0.821668	0.411271	All	-0.074433	0.181891	0.767522	0.664602	0.0983896	0.0808436	0.273687	-0.112	0.821668	0.411266	0.767511	C4
DSG2	0.225323	0.0518562	4.34515	1.39539e-05	All	0.123687	0.326959	0.00191124	0.664602	0.078026	0.339035	0.491966	0.186104	4.34515	1.3918e-05	0.00190632	C4
DSC2	0.158094	0.0646673	2.44473	0.0145006	All	0.0313484	0.28484	0.206687	0.664602	0.0973023	0.237878	0.42859	0.0471652	2.44473	0.0144961	0.206623	C4
DRG2	-0.0734661	0.107333	-0.684472	0.493682	All	-0.283834	0.136902	0.807357	0.664602	0.161499	-0.110542	0.205997	-0.42708	-0.684472	0.493677	0.807343	C4
DRAXIN	0.0807106	0.0818	0.986682	0.323805	All	-0.0796145	0.241036	0.711533	0.664602	0.123081	0.121442	0.362681	-0.119797	0.986682	0.323799	0.711504	C4
DPY30	-0.0697067	0.119217	-0.584705	0.55875	All	-0.303368	0.163954	0.838842	0.664602	0.179381	-0.104885	0.246702	-0.456472	-0.584705	0.558746	0.838837	C4
DPT	0.107635	0.0532209	2.02241	0.0431405	All	0.00332367	0.211946	0.340081	0.664602	0.0800794	0.161954	0.318909	0.00499812	2.02241	0.0431335	0.340026	C4
DPP7	-0.319085	0.115159	-2.77081	0.0055944	All	-0.544793	-0.0933765	0.122296	0.664602	0.173276	-0.480114	-0.140494	-0.819734	-2.77081	0.0055917	0.122236	C4
DPP6	-0.0154474	0.0652397	-0.236778	0.81283	All	-0.143315	0.11242	0.943573	0.664602	0.0981636	-0.023243	0.169158	-0.215644	-0.236778	0.812829	0.943571	C4
DNAJA2	-0.0961623	0.158121	-0.608158	0.543087	All	-0.406073	0.213749	0.833157	0.664602	0.237918	-0.144692	0.321628	-0.611011	-0.608158	0.543083	0.833147	C4
DPP10	-0.0736802	0.0674961	-1.09162	0.275006	All	-0.20597	0.0586097	0.676174	0.664602	0.101559	-0.110864	0.0881913	-0.309919	-1.09162	0.274999	0.676137	C4
DPEP2	0.0182724	0.054174	0.33729	0.7359	All	-0.0879068	0.124452	0.911908	0.664602	0.0815135	0.0274937	0.18726	-0.132273	0.33729	0.735898	0.911905	C4
DPEP1	0.140946	0.0935507	1.50662	0.131916	All	-0.0424104	0.324302	0.520655	0.664602	0.140762	0.212075	0.487969	-0.0638184	1.50662	0.131908	0.520622	C4
DOK2	0.0321591	0.233547	0.137699	0.890479	All	-0.425585	0.489903	0.965646	0.664602	0.351409	0.0483886	0.73715	-0.640373	0.137699	0.890479	0.965644	C4
DNPH1	-0.0871412	0.0986463	-0.88337	0.377042	All	-0.280484	0.106202	0.749291	0.664602	0.148429	-0.131118	0.159803	-0.422039	-0.88337	0.377036	0.749263	C4
DNMBP	-0.0195911	0.118106	-0.165877	0.868254	All	-0.251074	0.211892	0.96269	0.664602	0.177709	-0.0294779	0.318832	-0.377788	-0.165877	0.868254	0.962689	C4
DNER	-0.134326	0.0492984	-2.72476	0.00643784	All	-0.230949	-0.037703	0.132904	0.664602	0.0741774	-0.202115	-0.0567275	-0.347503	-2.72476	0.00643491	0.13279	C4
DNAJB8	-0.204621	0.109487	-1.86891	0.0616434	All	-0.419212	0.00996957	0.392629	0.664602	0.164741	-0.307886	0.0150068	-0.630778	-1.86891	0.0616358	0.392506	C4
DNAJB1	-0.278653	0.165885	-1.67979	0.0930059	All	-0.603783	0.0464764	0.46321	0.664602	0.249601	-0.419278	0.0699402	-0.908497	-1.67979	0.0929977	0.463169	C4
DTX3	0.0279659	0.0460883	0.60679	0.543994	All	-0.0623654	0.118297	0.833388	0.664602	0.0693472	0.0420792	0.178	-0.0938413	0.60679	0.54399	0.833383	C4
DUOX2	-0.0550258	0.135645	-0.40566	0.684995	All	-0.320886	0.210834	0.889881	0.664602	0.2041	-0.0827952	0.317241	-0.482831	-0.40566	0.684993	0.889878	C4
EGF	0.126252	0.197937	0.63784	0.523582	All	-0.261698	0.514202	0.823229	0.664602	0.297828	0.189967	0.773711	-0.393777	0.63784	0.523578	0.823214	C4
ENG	0.00601398	0.0334535	0.179771	0.857333	All	-0.0595537	0.0715817	0.959572	0.664602	0.0503362	0.009049	0.107708	-0.08961	0.179771	0.857332	0.95957	C4
ENAH	-0.0083953	0.0908711	-0.0923869	0.926391	All	-0.186499	0.169709	0.975947	0.664602	0.13673	-0.0126321	0.255359	-0.280623	-0.0923869	0.926391	0.975946	C4
ELOA	-0.0488125	0.10485	-0.465545	0.641544	All	-0.254315	0.15669	0.872714	0.664602	0.157764	-0.0734462	0.235771	-0.382663	-0.465545	0.641541	0.872711	C4
EIF5A	0.0570307	0.0563525	1.01203	0.311528	All	-0.0534182	0.16748	0.703061	0.664602	0.0847914	0.0858119	0.252003	-0.0803794	1.01203	0.311522	0.70303	C4
EIF4G1	-0.109288	0.191218	-0.571538	0.567638	All	-0.484069	0.265492	0.843805	0.664602	0.287718	-0.164442	0.399486	-0.728369	-0.571538	0.567635	0.8438	C4
EIF4EBP1	-0.133248	0.123937	-1.07513	0.282325	All	-0.376161	0.109664	0.683424	0.664602	0.186483	-0.200493	0.165014	-0.566001	-1.07513	0.282318	0.683389	C4
EIF4B	-0.154578	0.109043	-1.41759	0.156319	All	-0.368298	0.0591422	0.550487	0.664602	0.164072	-0.232587	0.0889948	-0.554169	-1.41759	0.156311	0.550433	C4
EGLN1	-0.0194216	0.10811	-0.179646	0.857432	All	-0.231314	0.192471	0.959572	0.664602	0.16267	-0.0292229	0.289609	-0.348055	-0.179646	0.857431	0.95957	C4
EGFR	0.0458878	0.0311382	1.47368	0.140576	All	-0.015142	0.106918	0.530075	0.664602	0.0468524	0.0690455	0.160876	-0.0227852	1.47368	0.140568	0.529996	C4
EGFL7	0.0232325	0.0750828	0.309425	0.757	All	-0.123927	0.170392	0.919815	0.664602	0.112974	0.034957	0.256386	-0.186472	0.309425	0.756998	0.919813	C4
DUSP3	-0.148513	0.161856	-0.917566	0.358852	All	-0.465745	0.168718	0.735147	0.664602	0.243538	-0.223462	0.253872	-0.700796	-0.917566	0.358846	0.735135	C4
EFNA4	0.00898919	0.0586854	0.153176	0.87826	All	-0.106032	0.12401	0.964386	0.664602	0.0883016	0.0135257	0.186597	-0.159545	0.153176	0.87826	0.964384	C4
EFNA1	0.457345	0.0538069	8.49975	1.96786e-17	All	0.351886	0.562805	2.87504e-14	0.664602	0.0809611	0.688149	0.846833	0.529465	8.49975	1.90001e-17	2.77591e-14	C4
EFEMP1	0.191553	0.0607997	3.15056	0.00163082	All	0.0723881	0.310718	0.0562825	0.664602	0.0914829	0.288223	0.467529	0.108916	3.15056	0.00162956	0.0562391	C4
EDIL3	-0.109211	0.0693245	-1.57537	0.11518	All	-0.245085	0.0266621	0.498849	0.664602	0.10431	-0.164326	0.0401211	-0.368773	-1.57537	0.115172	0.498813	C4
EDAR	0.0192946	0.175144	0.110164	0.91228	All	-0.323981	0.36257	0.972447	0.664602	0.263532	0.0290318	0.545555	-0.487491	0.110164	0.912279	0.972446	C4
EDA2R	0.0301713	0.0725997	0.415585	0.677716	All	-0.112121	0.172464	0.888286	0.664602	0.109238	0.0453976	0.259504	-0.168709	0.415585	0.677714	0.888283	C4
ECE1	-0.0412226	0.0665598	-0.619332	0.535702	All	-0.171677	0.0892322	0.829665	0.664602	0.10015	-0.062026	0.134268	-0.25832	-0.619332	0.535698	0.82966	C4
EBI3_IL27	0.0479436	0.0588817	0.814236	0.415515	All	-0.0674624	0.16335	0.770921	0.664602	0.088597	0.0721389	0.245789	-0.101511	0.814236	0.41551	0.770904	C4
EBAG9	-0.170646	0.179812	-0.949024	0.342614	All	-0.523071	0.181779	0.723434	0.664602	0.270556	-0.256764	0.273526	-0.787055	-0.949024	0.342608	0.723402	C4
ENO1	-0.0464724	0.150118	-0.309572	0.756888	All	-0.340698	0.247753	0.919815	0.664602	0.225876	-0.0699251	0.372793	-0.512643	-0.309572	0.756886	0.919813	C4
DLL1	0.167427	0.0576603	2.90369	0.00369006	All	0.0544154	0.28044	0.0949482	0.664602	0.0867591	0.251922	0.421969	0.0818736	2.90369	0.00368795	0.0948107	C4
CXCL16	-0.0321322	0.0459775	-0.698869	0.484638	All	-0.122246	0.057982	0.803393	0.664602	0.0691805	-0.0483481	0.0872457	-0.183942	-0.698869	0.484634	0.803385	C4
DARS1	-0.00861341	0.137761	-0.0625242	0.950146	All	-0.27862	0.261394	0.984366	0.664602	0.207284	-0.0129603	0.393316	-0.419237	-0.0625242	0.950145	0.984366	C4
DAPP1	0.036603	0.229746	0.15932	0.873418	All	-0.41369	0.486896	0.963794	0.664602	0.345689	0.0550751	0.732626	-0.622475	0.15932	0.873417	0.963793	C4
DAG1	-0.0745437	0.0916017	-0.81378	0.415776	All	-0.25408	0.104992	0.7712	0.664602	0.137829	-0.112163	0.157983	-0.382309	-0.81378	0.415771	0.771191	C4
DAB2	-0.194257	0.214316	-0.906406	0.364727	All	-0.614309	0.225794	0.739578	0.664602	0.322473	-0.292291	0.339756	-0.924338	-0.906406	0.364721	0.739566	C4
CXCL9	0.0282493	0.127441	0.221665	0.824576	All	-0.221531	0.27803	0.947219	0.664602	0.191756	0.0425056	0.418347	-0.333336	0.221665	0.824575	0.947218	C4
CXCL8	-0.222315	0.129255	-1.71998	0.0854444	All	-0.475649	0.0310192	0.447773	0.664602	0.194484	-0.334509	0.0466803	-0.715698	-1.71998	0.0854363	0.447682	C4
CXCL6	-0.219617	0.147796	-1.48595	0.137301	All	-0.509292	0.0700577	0.525623	0.664602	0.222383	-0.330449	0.105421	-0.76632	-1.48595	0.137293	0.525555	C4
CXCL5	-0.0212655	0.216279	-0.098324	0.921676	All	-0.445165	0.402634	0.975892	0.664602	0.325427	-0.0319973	0.60584	-0.669834	-0.098324	0.921675	0.975891	C4
CXCL3	0.0970133	0.180373	0.537849	0.590685	All	-0.256511	0.450538	0.852476	0.664602	0.2714	0.145972	0.677916	-0.385972	0.537849	0.590682	0.852472	C4
CXCL17	-0.175726	0.0955102	-1.83987	0.0657958	All	-0.362922	0.0114707	0.403898	0.664602	0.14371	-0.264408	0.0172646	-0.54608	-1.83987	0.065788	0.403843	C4
CTSV	-0.0294376	0.0792205	-0.37159	0.7102	All	-0.184707	0.125832	0.900429	0.664602	0.1192	-0.0442936	0.189338	-0.277926	-0.37159	0.710198	0.900426	C4
CXCL14	-0.00271358	0.112774	-0.024062	0.980803	All	-0.223747	0.21832	0.994404	0.664602	0.169687	-0.00408302	0.328504	-0.33667	-0.024062	0.980803	0.994404	C4
CXCL13	-0.105215	0.117518	-0.89531	0.370627	All	-0.335545	0.125116	0.745164	0.664602	0.176824	-0.158313	0.188263	-0.504888	-0.89531	0.370621	0.745153	C4
CXCL12	0.122632	0.075818	1.61746	0.105788	All	-0.0259682	0.271233	0.484765	0.664602	0.11408	0.18452	0.408117	-0.0390774	1.61746	0.10578	0.484707	C4
CXCL11	0.0225794	0.151288	0.149248	0.881359	All	-0.27394	0.319099	0.964486	0.664602	0.227638	0.0339744	0.480144	-0.412195	0.149248	0.881358	0.964484	C4
CXCL10	0.0878306	0.12968	0.677288	0.498228	All	-0.166337	0.341999	0.809655	0.664602	0.195124	0.132155	0.514599	-0.250288	0.677288	0.498223	0.809638	C4
CXCL1	-0.0931851	0.180162	-0.517231	0.604998	All	-0.446295	0.259925	0.859339	0.664602	0.271082	-0.140212	0.391109	-0.671532	-0.517231	0.604995	0.859331	C4
CXADR	-0.0804893	0.0972803	-0.827396	0.408018	All	-0.271155	0.110177	0.767522	0.664602	0.146374	-0.121109	0.165784	-0.408002	-0.827396	0.408013	0.767511	C4
CX3CL1	0.187403	0.0634776	2.95227	0.00315641	All	0.062989	0.311817	0.0848746	0.664602	0.0955122	0.281978	0.469182	0.0947737	2.95227	0.00315449	0.084823	C4
CTSZ	-0.182447	0.062239	-2.9314	0.00337637	All	-0.304433	-0.0604612	0.0888806	0.664602	0.0936485	-0.274521	-0.0909703	-0.458072	-2.9314	0.00337437	0.0888279	C4
DBI	-0.0951604	0.150566	-0.632019	0.527378	All	-0.390264	0.199943	0.825335	0.664602	0.22655	-0.143184	0.300854	-0.587222	-0.632019	0.527375	0.825324	C4
DBNL	-0.0271388	0.176809	-0.153492	0.878011	All	-0.373679	0.319401	0.964386	0.664602	0.266038	-0.0408347	0.4806	-0.562269	-0.153492	0.87801	0.964384	C4
DDX58	0.0716628	0.108967	0.657655	0.510764	All	-0.141909	0.285235	0.817185	0.664602	0.163959	0.107828	0.429187	-0.213531	0.657655	0.51076	0.817178	C4
DKKL1	0.0319892	0.162413	0.196962	0.843858	All	-0.286335	0.350313	0.955761	0.664602	0.244376	0.0481328	0.527111	-0.430845	0.196962	0.843857	0.955759	C4
DKK4	-0.163048	0.0881496	-1.84968	0.064368	All	-0.335818	0.00972184	0.401187	0.664602	0.132635	-0.245332	0.0146328	-0.505297	-1.84968	0.0643603	0.401083	C4
DKK3	0.0292283	0.0572051	0.510939	0.609397	All	-0.0828916	0.141348	0.859944	0.664602	0.0860742	0.0439786	0.212684	-0.124727	0.510939	0.609394	0.859934	C4
DKK1	-0.116536	0.114763	-1.01545	0.309896	All	-0.341468	0.108395	0.702496	0.664602	0.172679	-0.175348	0.163104	-0.513799	-1.01545	0.30989	0.702481	C4
DIABLO	0.27159	0.209694	1.29517	0.195268	All	-0.139402	0.682583	0.598503	0.664602	0.315518	0.408651	1.02707	-0.209765	1.29517	0.19526	0.598479	C4
DGKZ	0.0668902	0.0670892	0.997034	0.318754	All	-0.0646022	0.198383	0.707572	0.664602	0.100946	0.100647	0.298502	-0.097208	0.997034	0.318748	0.707558	C4
DFFA	0.025902	0.129954	0.199317	0.842015	All	-0.228802	0.280606	0.95536	0.664602	0.195536	0.0389737	0.422224	-0.344277	0.199317	0.842014	0.955358	C4
DEFB4A_DEFB4B	-0.500771	0.281424	-1.77942	0.0751793	All	-1.05235	0.0508101	0.425581	0.664602	0.423447	-0.75349	0.0764671	-1.58345	-1.77942	0.0751713	0.425531	C4
DEFA1_DEFA1B	-0.113204	0.101971	-1.11016	0.266938	All	-0.313064	0.0866557	0.668288	0.664602	0.153432	-0.170334	0.130393	-0.47106	-1.11016	0.266931	0.66825	C4
DECR1	-0.0053155	0.183073	-0.0290348	0.976837	All	-0.364133	0.353502	0.993497	0.664602	0.275463	-0.00799803	0.53191	-0.547906	-0.0290348	0.976837	0.993497	C4
DCBLD2	0.262674	0.0667303	3.93636	8.28741e-05	All	0.131885	0.393463	0.00705315	0.664602	0.100406	0.395236	0.592032	0.198439	3.93636	8.27277e-05	0.00704069	C4
DDR1	-0.00015684	0.0445667	-0.00351922	0.997192	All	-0.0875059	0.0871922	0.998735	0.664602	0.0670577	-0.000235991	0.131197	-0.131669	-0.00351922	0.997192	0.998735	C4
DDC	-0.171037	0.0924542	-1.84997	0.0643257	All	-0.352244	0.0101695	0.401187	0.664602	0.139112	-0.257353	0.0153066	-0.530013	-1.84997	0.064318	0.401083	C4
DDAH1	-0.0990915	0.0861838	-1.14977	0.250246	All	-0.268009	0.0698256	0.656438	0.664602	0.129677	-0.149099	0.105069	-0.403267	-1.14977	0.250239	0.65642	C4
DCXR	-0.532367	0.105212	-5.05996	4.21287e-07	All	-0.738579	-0.326156	0.000111909	0.664602	0.158308	-0.801032	-0.490748	-1.11132	-5.05996	4.19347e-07	0.000111394	C4
DCTPP1	0.0834616	0.0602952	1.38422	0.1663	All	-0.0347148	0.201638	0.564449	0.664602	0.0907239	0.125581	0.3034	-0.0522373	1.38422	0.166292	0.56439	C4
DCTN6	-0.0152365	0.135154	-0.112734	0.910242	All	-0.280134	0.249661	0.972162	0.664602	0.203361	-0.0229257	0.375662	-0.421513	-0.112734	0.910241	0.97216	C4
DCTN2	-0.0278339	0.178283	-0.156122	0.875937	All	-0.377261	0.321593	0.964386	0.664602	0.268255	-0.0418806	0.483899	-0.56766	-0.156122	0.875937	0.964384	C4
DCTN1	-0.0616968	0.124517	-0.495489	0.620258	All	-0.305746	0.182352	0.863129	0.664602	0.187356	-0.0928327	0.274385	-0.46005	-0.495489	0.620255	0.86312	C4
DCN	0.113654	0.0426434	2.66522	0.00769694	All	0.0300747	0.197234	0.147317	0.664602	0.0641638	0.171011	0.296772	0.0452499	2.66522	0.0076937	0.147255	C4
DLK1	-0.198463	0.108239	-1.83357	0.0667261	All	-0.410606	0.0136811	0.406121	0.664602	0.162862	-0.298619	0.0205912	-0.617829	-1.83357	0.0667183	0.406018	C4
GLA	-0.217837	0.0732706	-2.97305	0.00295073	All	-0.361445	-0.0742293	0.0813398	0.664602	0.110247	-0.327771	-0.111686	-0.543856	-2.97305	0.00294859	0.0812809	C4
GIT1	-0.00617771	0.1797	-0.0343778	0.972576	All	-0.358384	0.346028	0.992157	0.664602	0.270388	-0.00929535	0.520665	-0.539255	-0.0343778	0.972576	0.992156	C4
GIPR	0.0602548	0.0866469	0.695406	0.486806	All	-0.10957	0.23008	0.804248	0.664602	0.130374	0.090663	0.346196	-0.16487	0.695406	0.486801	0.804239	C4
GIMAP7	0.10619	0.060427	1.75732	0.0788722	All	-0.012245	0.224625	0.435386	0.664602	0.0909221	0.15978	0.337987	-0.0184279	1.75732	0.0788629	0.435335	C4
GHR	-0.153615	0.0584127	-2.62983	0.00854681	All	-0.268102	-0.0391285	0.156739	0.664602	0.0878913	-0.231139	-0.058872	-0.403406	-2.62983	0.00854283	0.156666	C4
GCHFR	0.0524454	0.0947971	0.553238	0.580104	All	-0.133354	0.238244	0.847815	0.664602	0.142637	0.0789125	0.358482	-0.200657	0.553238	0.5801	0.847809	C4
GC	-0.01064	0.0500265	-0.212688	0.831572	All	-0.10869	0.08741	0.95046	0.664602	0.0752728	-0.0160096	0.131525	-0.163544	-0.212688	0.831571	0.950457	C4
GPI	-0.00198384	0.0913111	-0.0217262	0.982666	All	-0.18095	0.176983	0.994949	0.664602	0.137392	-0.00298501	0.266304	-0.272274	-0.0217262	0.982666	0.994948	C4
GP5	-0.0218273	0.0672789	-0.324431	0.745614	All	-0.153692	0.110037	0.915278	0.664602	0.101232	-0.0328427	0.165572	-0.231257	-0.324431	0.745612	0.915274	C4
GLI2	0.178031	0.0631825	2.81772	0.00483941	All	0.0541955	0.301866	0.111638	0.664602	0.0950682	0.267876	0.45421	0.0815423	2.81772	0.00483652	0.111571	C4
GNPDA2	-0.116073	0.0686908	-1.68979	0.0910767	All	-0.250705	0.0185581	0.45959	0.664602	0.103356	-0.174651	0.0279274	-0.37723	-1.68979	0.0910672	0.459501	C4
GMPR2	-0.0971391	0.125485	-0.774106	0.438874	All	-0.343086	0.148808	0.783275	0.664602	0.188813	-0.146161	0.223912	-0.516235	-0.774106	0.438868	0.783257	C4
GLRX5	-0.0240962	0.166074	-0.145094	0.884638	All	-0.349595	0.301402	0.964568	0.664602	0.249885	-0.0362566	0.453517	-0.52603	-0.145094	0.884637	0.964567	C4
GSN	0.128287	0.035864	3.57705	0.000347991	All	0.0579951	0.198579	0.0188302	0.664602	0.0539631	0.193029	0.298796	0.0872611	3.57705	0.000347492	0.0188032	C4
FGL1	0.0223455	0.123398	0.181085	0.856302	All	-0.21951	0.264201	0.959572	0.664602	0.185672	0.0336223	0.397539	-0.330294	0.181085	0.856301	0.95957	C4
FGFR4	0.210218	0.0988861	2.12587	0.0335219	All	0.0164054	0.404032	0.30546	0.664602	0.14879	0.316307	0.607936	0.0246792	2.12587	0.0335144	0.305392	C4
FOLH1	0.678965	0.205006	3.31193	0.00092756	All	0.277161	1.08077	0.0369591	0.664602	0.308465	1.02161	1.6262	0.417022	3.31193	0.000926561	0.0369192	C4
FGF6	-0.0538547	0.0785483	-0.685626	0.492954	All	-0.207807	0.100097	0.807357	0.664602	0.118188	-0.0810331	0.150616	-0.312683	-0.685626	0.492949	0.807343	C4
FGF3	0.0260106	0.056384	0.461311	0.644579	All	-0.0845001	0.136521	0.87386	0.664602	0.0848388	0.0391371	0.205421	-0.127147	0.461311	0.644576	0.873856	C4
FGF20	0.0413526	0.0823942	0.501888	0.61575	All	-0.120137	0.202842	0.862109	0.664602	0.123975	0.0622217	0.305213	-0.18077	0.501888	0.615747	0.862104	C4
FGF16	0.121627	0.0878984	1.38373	0.166452	All	-0.0506505	0.293905	0.564526	0.664602	0.132257	0.183008	0.442232	-0.0762165	1.38373	0.166443	0.564457	C4
FGF12	-0.0170765	0.0867155	-0.196926	0.843887	All	-0.187036	0.152883	0.955761	0.664602	0.130477	-0.0256944	0.230041	-0.28143	-0.196926	0.843885	0.955759	C4
FN1	-0.0523319	0.0524198	-0.998323	0.31813	All	-0.155073	0.050409	0.707572	0.664602	0.078874	-0.0787417	0.0758513	-0.233335	-0.998323	0.318123	0.707558	C4
GAD2	0.239519	0.0873912	2.74076	0.00613297	All	0.068235	0.410802	0.129465	0.664602	0.131494	0.360394	0.618123	0.102666	2.74076	0.00612966	0.129352	C4
FUOM	-0.542465	0.123613	-4.3884	1.14541e-05	All	-0.784743	-0.300188	0.00164601	0.664602	0.185996	-0.816226	-0.451674	-1.18078	-4.3884	1.14186e-05	0.0016409	C4
GAPDH	-0.0859633	0.0605683	-1.41928	0.155827	All	-0.204675	0.0327484	0.549691	0.664602	0.0911347	-0.129346	0.0492784	-0.30797	-1.41928	0.155818	0.549657	C4
FOXJ3	0.103774	0.0849447	1.22167	0.221843	All	-0.0627145	0.270263	0.625297	0.664602	0.127813	0.156145	0.406658	-0.0943686	1.22167	0.221834	0.625272	C4
FGA	-0.0945279	0.0597106	-1.5831	0.113408	All	-0.211559	0.0225027	0.49605	0.664602	0.0898442	-0.142232	0.0338622	-0.318327	-1.5831	0.113398	0.495982	C4
GSR	-0.019146	0.0427578	-0.447778	0.654316	All	-0.10295	0.0646577	0.877067	0.664602	0.064336	-0.0288082	0.0972903	-0.154907	-0.447778	0.654313	0.877064	C4
IL21R	0.227817	0.102996	2.21189	0.026981	All	0.0259476	0.429686	0.274062	0.664602	0.154974	0.342787	0.646537	0.0390367	2.21189	0.0269742	0.273993	C4
IL12RB2	0.140818	0.0789121	1.7845	0.0743524	All	-0.0138466	0.295483	0.425581	0.664602	0.118736	0.211884	0.444606	-0.0208387	1.7845	0.0743431	0.425531	C4
IGLC2	0.0240688	0.0479978	0.501457	0.616053	All	-0.0700052	0.118143	0.862241	0.664602	0.0722204	0.0362154	0.177768	-0.105337	0.501457	0.61605	0.862232	C4
IL20RB	0.146563	0.0781604	1.87515	0.0607808	All	-0.006629	0.299754	0.391193	0.664602	0.117605	0.220527	0.451033	-0.00997863	1.87515	0.0607719	0.391136	C4
CRISP3	-0.0310807	0.0510907	-0.608344	0.542963	All	-0.131217	0.0690552	0.83312	0.664602	0.0768741	-0.0467659	0.103907	-0.197439	-0.608344	0.542959	0.833114	C4
INHBB	-0.048006	0.10023	-0.478957	0.631972	All	-0.244454	0.148442	0.868293	0.664602	0.150813	-0.0722327	0.22336	-0.367825	-0.478957	0.631969	0.868285	C4
IL36G	0.134367	0.126317	1.06372	0.287461	All	-0.113211	0.381944	0.688117	0.664602	0.190065	0.202177	0.574703	-0.17035	1.06372	0.287453	0.688099	C4
IL36A	0.153751	0.104785	1.4673	0.142304	All	-0.0516238	0.359126	0.531503	0.664602	0.157666	0.231343	0.540369	-0.077682	1.4673	0.142294	0.531467	C4
IL31RA	-0.0547583	0.0730854	-0.749237	0.45372	All	-0.198003	0.0884864	0.789813	0.664602	0.109969	-0.0823926	0.133146	-0.297931	-0.749237	0.453714	0.789803	C4
IL31	0.0290373	0.106291	0.273186	0.784712	All	-0.179289	0.237364	0.930878	0.664602	0.159932	0.0436912	0.357158	-0.269775	0.273186	0.78471	0.930876	C4
IGFL4	0.050774	0.140455	0.361497	0.71773	All	-0.224513	0.326061	0.905098	0.664602	0.211337	0.0763977	0.490618	-0.337823	0.361497	0.717728	0.905092	C4
HIF1A	0.0935092	0.122645	0.76244	0.445803	All	-0.14687	0.333889	0.787107	0.664602	0.184539	0.1407	0.502396	-0.220996	0.76244	0.445798	0.787086	C4
HS6ST2	0.0194805	0.0627597	0.310398	0.756261	All	-0.103526	0.142487	0.919604	0.664602	0.094432	0.0293115	0.214398	-0.155775	0.310398	0.756259	0.9196	C4
HRG	-0.00342022	0.0600388	-0.0569668	0.954572	All	-0.121094	0.114254	0.985488	0.664602	0.090338	-0.00514627	0.171916	-0.182209	-0.0569668	0.954572	0.985488	C4
HMCN2	-0.175088	0.107346	-1.63106	0.102888	All	-0.385483	0.035307	0.482308	0.664602	0.16152	-0.263448	0.0531309	-0.580027	-1.63106	0.102878	0.482257	C4
HGFAC	0.0618334	0.0536676	1.15216	0.249265	All	-0.0433531	0.16702	0.655235	0.664602	0.0807515	0.0930383	0.251311	-0.0652346	1.15216	0.249257	0.655199	C4
HEG1	-0.119176	0.0513923	-2.31894	0.0204045	All	-0.219903	-0.0184485	0.243933	0.664602	0.077328	-0.179319	-0.027756	-0.330882	-2.31894	0.0203984	0.243869	C4
HDAC8	0.220053	0.11769	1.86977	0.0615253	All	-0.0106155	0.450722	0.392629	0.664602	0.177084	0.331105	0.678189	-0.015979	1.86977	0.0615164	0.392506	C4
DDI2	0.07302	0.143622	0.50842	0.611162	All	-0.208473	0.354513	0.860809	0.664602	0.216102	0.10987	0.53343	-0.313689	0.50842	0.611159	0.860798	C4
DCTD	-0.0920473	0.176827	-0.520549	0.602685	All	-0.438623	0.254528	0.859339	0.664602	0.266065	-0.1385	0.382988	-0.659988	-0.520549	0.602681	0.859331	C4
DDX4	0.220834	0.102006	2.16491	0.0304016	All	0.0209059	0.420761	0.290622	0.664602	0.153484	0.33228	0.633108	0.0314508	2.16491	0.0303944	0.290544	C4
DBN1	0.0865623	0.0956849	0.904661	0.365652	All	-0.100977	0.274101	0.74051	0.664602	0.143973	0.130247	0.412434	-0.151941	0.904661	0.365645	0.740485	C4
DBH	-0.164912	0.20729	-0.795562	0.426292	All	-0.571194	0.241369	0.777836	0.664602	0.311901	-0.248137	0.36319	-0.859464	-0.795562	0.426287	0.777816	C4
DAPK2	0.0348974	0.105386	0.33114	0.740541	All	-0.171655	0.24145	0.912856	0.664602	0.15857	0.0525088	0.363305	-0.258288	0.33114	0.740539	0.912852	C4
DAND5	0.048878	0.105689	0.462468	0.643749	All	-0.158269	0.256025	0.873288	0.664602	0.159027	0.0735448	0.385237	-0.238148	0.462468	0.643746	0.873284	C4
DDX39A	0.0655629	0.0432672	1.5153	0.129705	All	-0.0192393	0.150365	0.517995	0.664602	0.0651024	0.0986499	0.226251	-0.0289509	1.5153	0.129696	0.517956	C4
DNAJB6	-0.088866	0.156595	-0.567491	0.570385	All	-0.395786	0.218054	0.844736	0.664602	0.235622	-0.133713	0.328106	-0.595532	-0.567491	0.570381	0.844725	C4
DNAJB2	0.0587604	0.101064	0.581415	0.560965	All	-0.139322	0.256843	0.839946	0.664602	0.152068	0.0884144	0.386467	-0.209638	0.581415	0.560961	0.839937	C4
DIPK2B	0.100491	0.0524658	1.91537	0.0554545	All	-0.00233986	0.203322	0.378873	0.664602	0.0789431	0.151205	0.305934	-0.00352354	1.91537	0.0554458	0.378763	C4
DGKA	-0.0418681	0.101443	-0.412724	0.679812	All	-0.240693	0.156957	0.888996	0.664602	0.152638	-0.0629972	0.236173	-0.362167	-0.412724	0.679809	0.888993	C4
DENR	0.006649	0.105854	0.0628129	0.949916	All	-0.200821	0.214119	0.984275	0.664602	0.159274	0.0100045	0.322182	-0.302174	0.0628129	0.949916	0.984274	C4
DEFB103A_DEFB103B	0.00137821	0.0764731	0.0180222	0.985621	All	-0.148506	0.151263	0.995534	0.664602	0.115066	0.00207374	0.227603	-0.223456	0.0180222	0.985621	0.995534	C4
DAAM1	-0.104502	0.155167	-0.673482	0.500645	All	-0.408623	0.199619	0.811212	0.664602	0.233473	-0.15724	0.300367	-0.614847	-0.673482	0.500641	0.811204	C4
CST1	-0.13779	0.17582	-0.783696	0.433224	All	-0.482391	0.206812	0.779633	0.664602	0.26455	-0.207327	0.311191	-0.725844	-0.783696	0.433218	0.779617	C4
CTBS	-0.232183	0.0516629	-4.49419	7.0074e-06	All	-0.33344	-0.130925	0.00107766	0.664602	0.0777351	-0.349356	-0.196996	-0.501717	-4.49419	6.98358e-06	0.001074	C4
CSNK1D	0.310384	0.11989	2.58891	0.00963217	All	0.0754045	0.545363	0.165885	0.664602	0.180393	0.467022	0.820593	0.113452	2.58891	0.00962793	0.165812	C4
CSH1	-0.0764494	0.0608983	-1.25536	0.209357	All	-0.195808	0.0429091	0.612223	0.664602	0.0916313	-0.11503	0.064567	-0.294628	-1.25536	0.209348	0.61218	C4
CSF3R	-0.0642081	0.0555577	-1.1557	0.247811	All	-0.173099	0.0446829	0.653721	0.664602	0.0835954	-0.0966114	0.0672356	-0.260459	-1.1557	0.247803	0.653699	C4
CSF2RB	0.0134366	0.0807692	0.166357	0.867877	All	-0.144868	0.171741	0.96269	0.664602	0.12153	0.0202175	0.258417	-0.217982	0.166357	0.867876	0.962689	C4
CSF1R	-0.0371487	0.0780318	-0.476072	0.634026	All	-0.190088	0.115791	0.869777	0.664602	0.117411	-0.0558962	0.17423	-0.286022	-0.476072	0.634023	0.869773	C4
CTSE	-0.0918993	0.0974463	-0.943077	0.345649	All	-0.282891	0.0990919	0.726242	0.664602	0.146624	-0.138277	0.149105	-0.425659	-0.943077	0.345642	0.72621	C4
F10	0.0112154	0.0527364	0.21267	0.831586	All	-0.0921459	0.114577	0.95046	0.664602	0.0793503	0.0168754	0.172402	-0.138651	0.21267	0.831585	0.950457	C4
F2	-0.0397501	0.0284762	-1.3959	0.162753	All	-0.0955625	0.0160623	0.559268	0.664602	0.0428471	-0.0598104	0.0241699	-0.143791	-1.3959	0.162744	0.559236	C4
F13B	-0.0303002	0.0485718	-0.623822	0.532749	All	-0.125499	0.0648989	0.827958	0.664602	0.0730841	-0.0455915	0.0976534	-0.188836	-0.623822	0.532745	0.827947	C4
F12	-0.0722601	0.0790223	-0.914427	0.360499	All	-0.227141	0.0826207	0.736114	0.664602	0.118902	-0.108727	0.12432	-0.341774	-0.914427	0.360492	0.7361	C4
F11	0.0516601	0.0575382	0.897841	0.369277	All	-0.0611127	0.164433	0.744103	0.664602	0.0865754	0.0777309	0.247419	-0.0919569	0.897841	0.369271	0.74409	C4
EVI5	0.0266541	0.167739	0.158902	0.873747	All	-0.302109	0.355417	0.963797	0.664602	0.25239	0.0401053	0.53479	-0.45458	0.158902	0.873746	0.963795	C4
ESR1	0.249578	0.110074	2.26736	0.0233745	All	0.0338367	0.46532	0.258462	0.664602	0.165624	0.375531	0.700154	0.0509068	2.26736	0.0233681	0.258329	C4
ERP29	-0.149421	0.222156	-0.672594	0.501211	All	-0.58484	0.285998	0.811802	0.664602	0.33427	-0.224828	0.430341	-0.879997	-0.672594	0.501206	0.811788	C4
ERMAP	-0.0806836	0.0854899	-0.943779	0.34529	All	-0.248241	0.0868736	0.726242	0.664602	0.128633	-0.121401	0.13072	-0.373523	-0.943779	0.345283	0.72621	C4
FCN1	0.217936	0.109531	1.98972	0.0466301	All	0.00325917	0.432613	0.348697	0.664602	0.164807	0.32792	0.650941	0.00489801	1.98972	0.0466218	0.348643	C4
EDNRB	0.12784	0.0851855	1.50072	0.133438	All	-0.0391211	0.2948	0.521656	0.664602	0.128175	0.192355	0.443579	-0.0588686	1.50072	0.133428	0.521578	C4
ECM1	-0.0388177	0.0687817	-0.564361	0.572512	All	-0.173627	0.0959919	0.844895	0.664602	0.103493	-0.0584075	0.144439	-0.261254	-0.564361	0.572508	0.844885	C4
EIF4E	-0.0455596	0.167923	-0.271312	0.786152	All	-0.374683	0.283563	0.931146	0.664602	0.252667	-0.0685517	0.426676	-0.563779	-0.271312	0.786151	0.931144	C4
DTD1	-0.0636221	0.162847	-0.390686	0.696032	All	-0.382797	0.255552	0.892788	0.664602	0.24503	-0.0957297	0.384528	-0.575988	-0.390686	0.696029	0.892786	C4
EP300	0.0486728	0.0576199	0.844722	0.398272	All	-0.0642602	0.161606	0.760911	0.664602	0.0866984	0.0732361	0.243165	-0.0966928	0.844722	0.398266	0.760897	C4
EPHA4	0.0503136	0.0537155	0.936669	0.348936	All	-0.0549668	0.155594	0.728278	0.664602	0.0808236	0.075705	0.234119	-0.0827093	0.936669	0.348929	0.728264	C4
B2M	0.0326177	0.0633936	0.514527	0.606887	All	-0.0916314	0.156867	0.859339	0.664602	0.0953858	0.0490786	0.236035	-0.137878	0.514527	0.606884	0.859331	C4
BABAM1	0.0844031	0.0540878	1.56048	0.118656	All	-0.0216071	0.190413	0.503712	0.664602	0.0813838	0.126998	0.28651	-0.0325143	1.56048	0.118646	0.503676	C4
BAG4	0.161418	0.093625	1.72409	0.0847015	All	-0.022084	0.344919	0.44621	0.664602	0.140874	0.242879	0.518992	-0.0332339	1.72409	0.0846921	0.44616	C4
ATRN	-0.0618363	0.0323612	-1.91082	0.0560367	All	-0.125263	0.00159044	0.380494	0.664602	0.0486926	-0.0930426	0.00239483	-0.18848	-1.91082	0.0560281	0.380398	C4
BCHE	-0.0343296	0.0535944	-0.640545	0.521823	All	-0.139373	0.0707134	0.823012	0.664602	0.0806413	-0.0516544	0.106403	-0.209711	-0.640545	0.521819	0.823005	C4
BCL2L15	0.0154755	0.108505	0.142625	0.886587	All	-0.19719	0.228141	0.964568	0.664602	0.163263	0.0232854	0.34328	-0.29671	0.142625	0.886586	0.964567	C4
BLNK	0.0876846	0.074083	1.1836	0.236581	All	-0.0575155	0.232885	0.640495	0.664602	0.11147	0.131935	0.350416	-0.0865454	1.1836	0.236572	0.640452	C4
ARHGAP45	-0.080771	0.153111	-0.527532	0.597828	All	-0.380863	0.219321	0.856013	0.664602	0.23038	-0.121533	0.330012	-0.573078	-0.527532	0.597824	0.856002	C4
APOF	0.204311	0.0450363	4.53658	5.73747e-06	All	0.116041	0.292581	0.000948956	0.664602	0.0677643	0.307419	0.440237	0.174601	4.53658	5.71725e-06	0.000945612	C4
APOL1	-0.07496	0.112559	-0.665962	0.50544	All	-0.295572	0.145652	0.815214	0.664602	0.169363	-0.112789	0.219162	-0.444741	-0.665962	0.505436	0.815207	C4
APPL2	-0.0986366	0.208447	-0.473198	0.636075	All	-0.507185	0.309911	0.870328	0.664602	0.313642	-0.148415	0.466323	-0.763152	-0.473198	0.636072	0.870319	C4
APOE	0.0970235	0.137521	0.705516	0.480494	All	-0.172513	0.36656	0.801067	0.664602	0.206923	0.145987	0.551556	-0.259581	0.705516	0.480489	0.801059	C4
ASGR2	0.033208	0.0502926	0.660297	0.509068	All	-0.0653636	0.13178	0.816837	0.664602	0.0756732	0.0499668	0.198286	-0.0983527	0.660297	0.509063	0.816825	C4
BMP10	-0.0358128	0.0549172	-0.652124	0.514326	All	-0.143448	0.0718229	0.818571	0.664602	0.0826317	-0.0538861	0.108072	-0.215844	-0.652124	0.514321	0.818558	C4
C5	-0.000648864	0.028954	-0.0224101	0.982121	All	-0.0573977	0.0560999	0.994949	0.664602	0.043566	-0.000976319	0.0844129	-0.0863656	-0.0224101	0.982121	0.994948	C4
C7	-0.0450199	0.0604836	-0.744332	0.456681	All	-0.163566	0.0735258	0.791355	0.664602	0.0910073	-0.0677397	0.110635	-0.246114	-0.744332	0.456675	0.791338	C4
C8B	0.0565964	0.0579197	0.977152	0.328501	All	-0.0569242	0.170117	0.714871	0.664602	0.0871495	0.0851583	0.255971	-0.0856548	0.977152	0.328494	0.714842	C4
C9	0.39594	0.101607	3.89677	9.76775e-05	All	0.196793	0.595087	0.00764501	0.664602	0.152884	0.595755	0.895409	0.296102	3.89677	9.74843e-05	0.00762989	C4
C3	-0.156668	0.0867654	-1.80565	0.0709823	All	-0.326725	0.0133892	0.416991	0.664602	0.130553	-0.235732	0.0201509	-0.491615	-1.80565	0.0709731	0.416904	C4
CA8	0.0193312	0.049788	0.38827	0.697819	All	-0.0782515	0.116914	0.893285	0.664602	0.074914	0.0290868	0.175918	-0.117745	0.38827	0.697816	0.893279	C4
CACYBP	-0.150031	0.19192	-0.781742	0.434372	All	-0.526187	0.226124	0.780243	0.664602	0.288774	-0.225746	0.34025	-0.791743	-0.781742	0.434366	0.780233	C4
C1QL2	0.0569955	0.0814305	0.699928	0.483977	All	-0.102605	0.216596	0.802904	0.664602	0.122525	0.0857588	0.325908	-0.154391	0.699928	0.483973	0.802896	C4
BMPER	-0.0576011	0.0439614	-1.31026	0.190115	All	-0.143764	0.0285617	0.590932	0.664602	0.066147	-0.0866701	0.042978	-0.216318	-1.31026	0.190106	0.590908	C4
BNIP3L	0.0603353	0.0829545	0.727329	0.467029	All	-0.102253	0.222923	0.795993	0.664602	0.124818	0.0907841	0.335428	-0.15386	0.727329	0.467024	0.795978	C4
BTD	-0.170722	0.0400619	-4.26146	2.03658e-05	All	-0.249242	-0.0922023	0.00248461	0.664602	0.0602795	-0.256879	-0.138731	-0.375027	-4.26146	2.03092e-05	0.00247867	C4
C1QTNF5	-0.122359	0.0702369	-1.74209	0.0815012	All	-0.260021	0.0153025	0.439385	0.664602	0.105683	-0.184109	0.0230288	-0.391247	-1.74209	0.0814919	0.439334	C4
C1QTNF9	0.0393023	0.090471	0.434419	0.663987	All	-0.138018	0.216622	0.882148	0.664602	0.136128	0.0591366	0.325948	-0.207674	0.434419	0.663984	0.882145	C4
C1R	-0.0203961	0.0366549	-0.556436	0.577917	All	-0.0922383	0.0514461	0.846802	0.664602	0.0551531	-0.0306892	0.0774109	-0.138789	-0.556436	0.577913	0.846797	C4
C1RL	-0.0453566	0.038926	-1.1652	0.243946	All	-0.12165	0.0309369	0.650248	0.664602	0.0585703	-0.0682463	0.0465516	-0.183044	-1.1652	0.243937	0.650199	C4
C1S	-0.0327302	0.0406147	-0.805872	0.420322	All	-0.112333	0.046873	0.774315	0.664602	0.0611113	-0.0492479	0.0705302	-0.169026	-0.805872	0.420316	0.774292	C4
CASP9	0.183853	0.116212	1.58205	0.113647	All	-0.0439179	0.411624	0.496335	0.664602	0.174859	0.276636	0.61936	-0.0660878	1.58205	0.113638	0.496299	C4
APOD	0.270673	0.0812185	3.33265	0.000861182	All	0.111488	0.429858	0.0352763	0.664602	0.122206	0.407271	0.646795	0.167746	3.33265	0.000860233	0.0352374	C4
ADAMTS4	0.120383	0.0671565	1.79258	0.0730499	All	-0.0112412	0.252007	0.421841	0.664602	0.101048	0.181136	0.379189	-0.0169178	1.79258	0.0730407	0.421788	C4
ADD1	-0.131806	0.130093	-1.01317	0.310986	All	-0.386783	0.123171	0.703061	0.664602	0.195745	-0.198323	0.185338	-0.581984	-1.01317	0.310979	0.70303	C4
ADGRD1	-0.0889512	0.073763	-1.20591	0.227863	All	-0.233524	0.0556216	0.631582	0.664602	0.110988	-0.133841	0.0836956	-0.351378	-1.20591	0.227854	0.631554	C4
ADH1B	-0.509455	0.146653	-3.47389	0.000513635	All	-0.796889	-0.222021	0.0255825	0.664602	0.220663	-0.766557	-0.334059	-1.19906	-3.47389	0.000512974	0.0255496	C4
ADIPOQ	0.538419	0.135906	3.9617	7.45755e-05	All	0.272048	0.80479	0.00653729	0.664602	0.204493	0.810138	1.21094	0.409332	3.9617	7.44184e-05	0.00652352	C4
AFAP1	-0.131088	0.159682	-0.82093	0.411692	All	-0.44406	0.181884	0.767522	0.664602	0.240268	-0.197243	0.273682	-0.668168	-0.82093	0.411686	0.767511	C4
AFM	-0.187875	0.0399217	-4.70609	2.53539e-06	All	-0.26612	-0.10963	0.000463025	0.664602	0.0600686	-0.282688	-0.164954	-0.400423	-4.70609	2.52511e-06	0.000461148	C4
ADAMTS1	0.0754864	0.0594658	1.26941	0.204304	All	-0.0410645	0.192037	0.609351	0.664602	0.0894759	0.113581	0.288954	-0.0617913	1.26941	0.204295	0.609293	C4
ABO	0.463394	0.27635	1.67683	0.0935846	All	-0.0782432	1.00503	0.463782	0.664602	0.415814	0.69725	1.51224	-0.117744	1.67683	0.093575	0.463706	C4
ACE	0.0271733	0.0508801	0.534065	0.5933	All	-0.0725499	0.126896	0.853965	0.664602	0.0765573	0.0408866	0.190939	-0.109166	0.534065	0.593296	0.853957	C4
ACHE	-0.0315272	0.0626229	-0.503445	0.614655	All	-0.154266	0.0912115	0.861807	0.664602	0.0942262	-0.0474377	0.137246	-0.232121	-0.503445	0.614651	0.861798	C4
ACP1	0.174044	0.083693	2.07956	0.0375738	All	0.0100092	0.33808	0.319544	0.664602	0.12593	0.261878	0.5087	0.0150559	2.07956	0.0375661	0.319421	C4
A1BG	-0.0361744	0.0331222	-1.09215	0.274776	All	-0.101093	0.028744	0.675839	0.664602	0.0498377	-0.0544302	0.0432518	-0.152112	-1.09215	0.274768	0.675819	C4
ACRV1	0.197818	0.147474	1.34137	0.179809	All	-0.0912264	0.486863	0.578575	0.664602	0.221899	0.297649	0.732571	-0.137273	1.34137	0.179799	0.578549	C4
ACYP1	-0.134914	0.122402	-1.10223	0.270372	All	-0.374817	0.104989	0.672716	0.664602	0.184173	-0.203	0.157979	-0.563979	-1.10223	0.270363	0.672683	C4
ADAM12	-0.018717	0.0675156	-0.277225	0.781609	All	-0.151045	0.113611	0.929557	0.664602	0.101588	-0.0281628	0.17095	-0.227275	-0.277225	0.781607	0.929553	C4
ANKMY2	0.107291	0.148177	0.724075	0.469025	All	-0.18313	0.397712	0.796643	0.664602	0.222956	0.161437	0.59843	-0.275557	0.724075	0.46902	0.796634	C4
ANXA1	-0.109954	0.083103	-1.32311	0.185809	All	-0.272833	0.0529249	0.586014	0.664602	0.125042	-0.165444	0.0796385	-0.410526	-1.32311	0.1858	0.585985	C4
APCS	-0.0753763	0.0712018	-1.05863	0.289776	All	-0.214929	0.0641766	0.689765	0.664602	0.107135	-0.113416	0.0965679	-0.323399	-1.05863	0.289768	0.689724	C4
APOA1	0.0728185	0.0531848	1.36916	0.170958	All	-0.0314217	0.177059	0.568203	0.664602	0.080025	0.109567	0.266416	-0.0472818	1.36916	0.170949	0.568172	C4
APOA2	0.12978	0.0945046	1.37327	0.169679	All	-0.0554455	0.315006	0.567278	0.664602	0.142197	0.195275	0.473982	-0.0834318	1.37327	0.169669	0.567215	C4
APOA4	-0.00314801	0.0679153	-0.0463521	0.96303	All	-0.136259	0.129963	0.98921	0.664602	0.102189	-0.00473669	0.195555	-0.205028	-0.0463521	0.96303	0.98921	C4
APOB	0.0193439	0.0436687	0.442969	0.657791	All	-0.0662453	0.104933	0.878351	0.664602	0.0657066	0.029106	0.157891	-0.099679	0.442969	0.657788	0.878344	C4
AHSG	-0.0460967	0.0524219	-0.879342	0.379222	All	-0.148842	0.0566482	0.749871	0.664602	0.0788771	-0.0693599	0.0852392	-0.223959	-0.879342	0.379216	0.749858	C4
AKAP12	0.00510625	0.0397011	0.128617	0.897661	All	-0.0727064	0.0829189	0.967459	0.664602	0.0597366	0.00768318	0.124767	-0.109401	0.128617	0.89766	0.967457	C4
AKR7L	-0.1358	0.13289	-1.0219	0.306837	All	-0.396259	0.12466	0.700344	0.664602	0.199954	-0.204332	0.187578	-0.596243	-1.0219	0.30683	0.700312	C4
AGT	-0.00840349	0.0433514	-0.193846	0.846298	All	-0.0933707	0.0765637	0.956313	0.664602	0.0652292	-0.0126444	0.115205	-0.140494	-0.193846	0.846297	0.956312	C4
ALPI	-0.345115	0.229284	-1.50519	0.132285	All	-0.794503	0.104273	0.52161	0.664602	0.344994	-0.519281	0.156908	-1.19547	-1.50519	0.132276	0.521549	C4
AMOT	0.0474413	0.0776721	0.61079	0.541343	All	-0.104793	0.199676	0.832528	0.664602	0.11687	0.0713831	0.300449	-0.157682	0.61079	0.541339	0.832522	C4
AMY1A_AMY1B_AMY1C	0.0388903	0.0911556	0.426636	0.669647	All	-0.139771	0.217552	0.883124	0.664602	0.137158	0.0585167	0.327347	-0.210313	0.426636	0.669644	0.88312	C4
APOC1	0.182152	0.0705351	2.58244	0.00981487	All	0.0439061	0.320399	0.167387	0.664602	0.106131	0.274078	0.482095	0.0660599	2.58244	0.00981058	0.167314	C4
CLEC12A	0.0368369	0.0380295	0.968639	0.332732	All	-0.0376996	0.111373	0.716992	0.664602	0.0572215	0.055427	0.167581	-0.0567272	0.968639	0.332725	0.716963	C4
CHAD	0.141172	0.0941774	1.499	0.133882	All	-0.0434121	0.325757	0.521656	0.664602	0.141705	0.212416	0.490158	-0.0653256	1.499	0.133873	0.521578	C4
CFH	-0.12695	0.0480879	-2.63995	0.00829566	All	-0.221201	-0.0326993	0.153742	0.664602	0.072356	-0.191017	-0.0491987	-0.332834	-2.63995	0.00829174	0.153669	C4
CEBPA	0.0717435	0.0707615	1.01388	0.310649	All	-0.0669465	0.210433	0.70302	0.664602	0.106472	0.10795	0.316635	-0.100736	1.01388	0.310641	0.702988	C4
CELSR2	-0.0536193	0.0545829	-0.982346	0.325937	All	-0.1606	0.0533612	0.713307	0.664602	0.0821287	-0.0806788	0.0802935	-0.241651	-0.982346	0.32593	0.713293	C4
CEMIP2	-0.0636045	0.0627177	-1.01414	0.310524	All	-0.186529	0.0593199	0.70302	0.664602	0.0943688	-0.0957031	0.0892597	-0.280666	-1.01414	0.310516	0.702988	C4
CFB	-0.0613202	0.0663558	-0.924111	0.355435	All	-0.191375	0.0687349	0.733689	0.664602	0.099843	-0.092266	0.103426	-0.287958	-0.924111	0.355428	0.733663	C4
CFD	0.0906067	0.0398103	2.27596	0.0228546	All	0.01258	0.168633	0.25554	0.664602	0.0599009	0.136332	0.253738	0.0189265	2.27596	0.0228482	0.255422	C4
CFHR2	-0.201319	0.109896	-1.8319	0.0669753	All	-0.416711	0.0140737	0.40653	0.664602	0.165356	-0.302916	0.021182	-0.627015	-1.8319	0.0669662	0.406427	C4
CFHR4	-0.214531	0.139349	-1.53953	0.123686	All	-0.487649	0.0585875	0.510021	0.664602	0.209672	-0.322796	0.0881619	-0.733753	-1.53953	0.123676	0.509957	C4
CFHR5	0.0242407	0.0789203	0.307154	0.758728	All	-0.13044	0.178922	0.920555	0.664602	0.118748	0.036474	0.269221	-0.196273	0.307154	0.758726	0.920553	C4
CFI	-0.0835082	0.0415758	-2.00857	0.0445904	All	-0.164995	-0.00202104	0.343103	0.664602	0.0625575	-0.125651	-0.00303872	-0.248264	-2.00857	0.0445822	0.343002	C4
CFP	0.00448883	0.0449488	0.0998655	0.920452	All	-0.0836092	0.0925868	0.975421	0.664602	0.0676326	0.00675416	0.139314	-0.125806	0.0998655	0.920451	0.97542	C4
CGB3_CGB5_CGB8	0.0836669	0.0804783	1.03962	0.298524	All	-0.0740676	0.241401	0.693752	0.664602	0.121093	0.12589	0.363232	-0.111451	1.03962	0.298516	0.693734	C4
CLEC3B	0.0461473	0.0398506	1.15801	0.24687	All	-0.0319585	0.124253	0.653203	0.664602	0.0599617	0.069436	0.186961	-0.0480889	1.15801	0.246861	0.653181	C4
CPOX	0.0551304	0.0511116	1.07863	0.280761	All	-0.0450464	0.155307	0.683204	0.664602	0.0769055	0.0829526	0.233687	-0.0677823	1.07863	0.280753	0.683184	C4
CPA4	0.0940351	0.0804193	1.16931	0.242287	All	-0.0635837	0.251654	0.648602	0.664602	0.121004	0.141491	0.378658	-0.0956763	1.16931	0.242278	0.648559	C4
CPB2	0.0214171	0.0431161	0.49673	0.619383	All	-0.063089	0.105923	0.862512	0.664602	0.0648752	0.0322254	0.159381	-0.0949299	0.49673	0.61938	0.862507	C4
CR1	-0.0105956	0.0689982	-0.153563	0.877956	All	-0.14583	0.124639	0.964386	0.664602	0.103819	-0.0159427	0.187542	-0.219428	-0.153563	0.877955	0.964384	C4
CRELD1	-0.055541	0.073588	-0.754756	0.450401	All	-0.199771	0.0886888	0.788467	0.664602	0.110725	-0.0835704	0.133451	-0.300591	-0.754756	0.450395	0.788446	C4
CLU	-0.0133406	0.0594017	-0.224582	0.822306	All	-0.129766	0.103085	0.946626	0.664602	0.0893794	-0.020073	0.155111	-0.195257	-0.224582	0.822304	0.946624	C4
COL5A1	-0.176065	0.0748486	-2.35228	0.0186644	All	-0.322766	-0.0293646	0.231875	0.664602	0.112622	-0.264918	-0.0441797	-0.485657	-2.35228	0.0186585	0.231758	C4
CCNE1	0.614785	0.179669	3.42177	0.000622908	All	0.262641	0.966929	0.028739	0.664602	0.27034	0.925043	1.45491	0.395175	3.42177	0.00062215	0.028704	C4
CD226	-0.00597183	0.0781699	-0.0763955	0.939105	All	-0.159182	0.147238	0.981468	0.664602	0.117619	-0.00898557	0.221548	-0.239519	-0.0763955	0.939104	0.981468	C4
CAT	-0.0486733	0.101082	-0.481525	0.630147	All	-0.24679	0.149443	0.866937	0.664602	0.152093	-0.0732368	0.224866	-0.37134	-0.481525	0.630144	0.866927	C4
CD72	0.064361	0.0827609	0.777674	0.436767	All	-0.0978473	0.226569	0.782091	0.664602	0.124527	0.0968415	0.340914	-0.147232	0.777674	0.436761	0.782073	C4
CD7	0.112065	0.0818179	1.36969	0.170792	All	-0.0482946	0.272425	0.568134	0.664602	0.123108	0.16862	0.409912	-0.0726715	1.36969	0.170783	0.568076	C4
CD300A	0.127609	0.0574828	2.21996	0.0264286	All	0.014945	0.240274	0.273222	0.664602	0.0864922	0.192009	0.361533	0.0224841	2.21996	0.0264218	0.273162	C4
CD36	-0.0387297	0.0835382	-0.463617	0.642925	All	-0.202462	0.125002	0.873239	0.664602	0.125697	-0.0582751	0.18809	-0.304641	-0.463617	0.642922	0.873235	C4
CD3G	0.273121	0.168935	1.61672	0.105948	All	-0.0579854	0.604228	0.484886	0.664602	0.25419	0.410955	0.909167	-0.0872575	1.61672	0.105938	0.484816	C4
CD5L	0.133611	0.0895176	1.49256	0.135561	All	-0.0418406	0.309062	0.524648	0.664602	0.134694	0.201039	0.465038	-0.0629607	1.49256	0.135551	0.524611	C4
SERPINF1	-0.114231	0.0550034	-2.0768	0.037828	All	-0.222036	-0.00642627	0.319544	0.664602	0.0827614	-0.171879	-0.00966637	-0.334091	-2.0768	0.0378202	0.319421	C4
SERPINF2	-0.0592197	0.0256346	-2.31014	0.0208863	All	-0.109463	-0.00897675	0.245703	0.664602	0.0385714	-0.0891055	-0.0135056	-0.164705	-2.31014	0.0208801	0.245586	C4
SERPING1	-0.0195113	0.0358571	-0.544139	0.586349	All	-0.08979	0.0507674	0.849998	0.664602	0.0539528	-0.0293578	0.0763897	-0.135105	-0.544139	0.586346	0.849993	C4
SERPINI1	-0.0202895	0.0567571	-0.357479	0.720736	All	-0.131531	0.0909524	0.906018	0.664602	0.0854001	-0.0305287	0.136856	-0.197913	-0.357479	0.720733	0.906013	C4
SERPINC1	-0.0205823	0.028108	-0.732256	0.464017	All	-0.0756729	0.0345084	0.794905	0.664602	0.042293	-0.0309693	0.0519249	-0.113864	-0.732256	0.464012	0.794888	C4
SFRP4	-0.206937	0.0795217	-2.60228	0.00926488	All	-0.362797	-0.0510778	0.162432	0.664602	0.119653	-0.311371	-0.0768504	-0.545891	-2.60228	0.00926072	0.162359	C4
SHBG	0.272063	0.104129	2.61276	0.00898563	All	0.0679745	0.476152	0.16108	0.664602	0.156679	0.409363	0.716453	0.102273	2.61276	0.00898154	0.161007	C4
SHH	0.175319	0.0811541	2.16033	0.0307544	All	0.0162604	0.334379	0.292718	0.664602	0.122109	0.263796	0.503131	0.024462	2.16033	0.0307472	0.292649	C4
SERPIND1	-0.0957455	0.0562235	-1.70294	0.0885881	All	-0.205942	0.0144506	0.454463	0.664602	0.0845973	-0.144064	0.0217463	-0.309875	-1.70294	0.0885786	0.454373	C4
SERPINA3	-0.00406415	0.0288208	-0.141014	0.887859	All	-0.0605519	0.0524236	0.964568	0.664602	0.0433655	-0.00611516	0.0788813	-0.0911116	-0.141014	0.887859	0.964567	C4
SEMA3G	-0.0229027	0.0829482	-0.276108	0.782467	All	-0.185478	0.139673	0.930155	0.664602	0.124809	-0.0344608	0.210165	-0.279086	-0.276108	0.782465	0.930151	C4
SEMA6C	0.0921479	0.049676	1.85498	0.0636083	All	-0.00521527	0.189511	0.39942	0.664602	0.0747455	0.138651	0.285153	-0.0078499	1.85498	0.0635993	0.399364	C4
SERPINA1	-0.0211087	0.0153682	-1.37353	0.169596	All	-0.0512298	0.0090124	0.56722	0.664602	0.0231239	-0.0317614	0.0135614	-0.0770843	-1.37353	0.169587	0.567188	C4
SERPINA4	-0.0882706	0.0448226	-1.96933	0.0489232	All	-0.176121	-0.000419945	0.356352	0.664602	0.0674428	-0.132817	-0.000629446	-0.265005	-1.96933	0.0489149	0.356238	C4
SERPINA5	-0.116732	0.0611262	-1.90969	0.0561821	All	-0.236537	0.00307317	0.380508	0.664602	0.0919742	-0.175642	0.00462738	-0.355912	-1.90969	0.0561734	0.380398	C4
SERPINA6	0.0111962	0.0328704	0.340617	0.733394	All	-0.0532286	0.075621	0.911101	0.664602	0.0494588	0.0168465	0.113786	-0.0800927	0.340617	0.733392	0.911096	C4
SERPINA7	-0.0913274	0.0359263	-2.54208	0.0110242	All	-0.161742	-0.0209131	0.178424	0.664602	0.0540569	-0.137417	-0.0314652	-0.243368	-2.54208	0.0110196	0.178361	C4
ZNF174	0.0680737	0.070926	0.959785	0.337171	All	-0.0709387	0.207086	0.72036	0.664602	0.10672	0.102428	0.311598	-0.106742	0.959785	0.337164	0.720345	C4
ZBP1	0.182326	0.0768847	2.37142	0.0177255	All	0.0316348	0.333017	0.2264	0.664602	0.115685	0.274339	0.501082	0.0475954	2.37142	0.0177198	0.226337	C4
YY1	0.0969691	0.052659	1.84145	0.065564	All	-0.0062406	0.200179	0.403898	0.664602	0.0792338	0.145905	0.301204	-0.00939283	1.84145	0.065555	0.403817	C4
YWHAQ	-0.000653183	0.137672	-0.00474449	0.996214	All	-0.270485	0.269179	0.998735	0.664602	0.20715	-0.000982819	0.405031	-0.406996	-0.00474449	0.996214	0.998735	C4
XIAP	0.10483	0.107887	0.971658	0.331228	All	-0.106626	0.316285	0.71559	0.664602	0.162334	0.157733	0.475908	-0.160441	0.971658	0.331221	0.715561	C4
SNX15	0.0562658	0.102079	0.551199	0.581501	All	-0.143805	0.256337	0.848089	0.664602	0.153594	0.0846609	0.385705	-0.216383	0.551199	0.581497	0.848079	C4
WASL	0.18491	0.113421	1.63031	0.103046	All	-0.03739	0.407211	0.482355	0.664602	0.170659	0.278227	0.61272	-0.0562654	1.63031	0.103037	0.482257	C4
SIRT1	0.54208	0.167191	3.24228	0.00118696	All	0.214392	0.869769	0.0435352	0.664602	0.251566	0.815647	1.30872	0.322578	3.24228	0.00118578	0.0434918	C4
SLC9A3R1	-0.0979551	0.159299	-0.614912	0.538617	All	-0.410176	0.214266	0.830795	0.664602	0.239691	-0.147389	0.322406	-0.617184	-0.614912	0.538613	0.830789	C4
SLITRK1	0.207	0.0642855	3.22001	0.00128313	All	0.0810024	0.332997	0.0462877	0.664602	0.0967279	0.311464	0.501051	0.121878	3.22001	0.00128188	0.0462427	C4
SMPD3	0.376674	0.111579	3.37585	0.000736733	All	0.157983	0.595365	0.0318875	0.664602	0.167888	0.566766	0.895828	0.237705	3.37585	0.000735881	0.0318282	C4
SNCA	-0.431008	0.216426	-1.99148	0.0464362	All	-0.855196	-0.0068212	0.34851	0.664602	0.325648	-0.648521	-0.0102519	-1.28679	-1.99148	0.046428	0.348448	C4
VTI1A	-0.00339522	0.109924	-0.030887	0.97536	All	-0.218843	0.212052	0.993042	0.664602	0.165398	-0.00510865	0.319072	-0.32929	-0.030887	0.97536	0.993042	C4
RAP1A	0.183361	0.127987	1.43266	0.151965	All	-0.0674882	0.43421	0.54573	0.664602	0.192576	0.275896	0.653346	-0.101554	1.43266	0.151956	0.545696	C4
RBPMS	0.118446	0.125335	0.945036	0.344647	All	-0.127206	0.364097	0.725721	0.664602	0.188586	0.178221	0.54785	-0.191408	0.945036	0.34464	0.725707	C4
RABEP1	-0.064959	0.144877	-0.448375	0.653886	All	-0.348912	0.218994	0.877067	0.664602	0.21799	-0.0977412	0.329519	-0.525002	-0.448375	0.653883	0.877064	C4
RELB	0.0822878	0.0942846	0.872759	0.382801	All	-0.102507	0.267082	0.752533	0.664602	0.141866	0.123815	0.401873	-0.154243	0.872759	0.382794	0.75251	C4
REPS1	0.174605	0.073068	2.38962	0.0168713	All	0.0313943	0.317816	0.219102	0.664602	0.109943	0.262721	0.478209	0.0472338	2.38962	0.0168657	0.219029	C4
RALB	-0.012946	0.0558932	-0.23162	0.816835	All	-0.122495	0.0966027	0.944889	0.664602	0.0841003	-0.0194793	0.145357	-0.184316	-0.23162	0.816833	0.944888	C4
PTGES2	-0.0794595	0.101779	-0.780705	0.434981	All	-0.278943	0.120024	0.780243	0.664602	0.153143	-0.11956	0.180601	-0.41972	-0.780705	0.434976	0.780233	C4
PTP4A3	-0.0720335	0.0988948	-0.728385	0.466383	All	-0.265864	0.121797	0.795856	0.664602	0.148803	-0.108386	0.183268	-0.40004	-0.728385	0.466378	0.795847	C4
PTPN9	0.213249	0.071953	2.96373	0.00304151	All	0.0722241	0.354274	0.0828008	0.664602	0.108265	0.320868	0.533067	0.108669	2.96373	0.00303933	0.0827415	C4
PSTPIP2	-0.000585025	0.194944	-0.00300098	0.997606	All	-0.382669	0.381499	0.998735	0.664602	0.293325	-0.000880263	0.574037	-0.575797	-0.00300098	0.997606	0.998735	C4
PTRHD1	-0.0237907	0.112332	-0.211789	0.832273	All	-0.243957	0.196376	0.95084	0.664602	0.169021	-0.0357969	0.295485	-0.367079	-0.211789	0.832271	0.950837	C4
PZP	-0.146717	0.103322	-1.42	0.155619	All	-0.349225	0.0557907	0.549399	0.664602	0.155465	-0.220759	0.0839517	-0.52547	-1.42	0.155609	0.549363	C4
QSOX1	-0.139098	0.0793212	-1.7536	0.0795078	All	-0.294565	0.0163688	0.436332	0.664602	0.119351	-0.209295	0.0246338	-0.443224	-1.7536	0.0794985	0.436237	C4
SAA4	0.0333247	0.0605519	0.550349	0.582084	All	-0.0853548	0.152004	0.848089	0.664602	0.09111	0.0501424	0.228718	-0.128433	0.550349	0.58208	0.848079	C4
SCGB3A1	-0.0614051	0.0496885	-1.2358	0.216541	All	-0.158793	0.0359825	0.619247	0.664602	0.0747643	-0.0923939	0.0541441	-0.238932	-1.2358	0.216532	0.619206	C4
SDK2	0.0759954	0.0717305	1.05946	0.289399	All	-0.0645938	0.216584	0.68943	0.664602	0.10793	0.114347	0.32589	-0.0971956	1.05946	0.289392	0.689395	C4
SELENOP	-0.0137532	0.0430101	-0.319766	0.749147	All	-0.0980514	0.070545	0.917052	0.664602	0.0647156	-0.0206939	0.106149	-0.147536	-0.319766	0.749145	0.917046	C4
S100A13	-0.0157599	0.0663584	-0.237497	0.812273	All	-0.14582	0.1143	0.943573	0.664602	0.0998468	-0.0237133	0.171987	-0.219413	-0.237497	0.812272	0.94357	C4
RNF168	0.0990691	0.0772586	1.28231	0.199745	All	-0.052355	0.250493	0.604614	0.664602	0.116248	0.149065	0.376911	-0.0787807	1.28231	0.199736	0.604587	C4
RIDA	-0.30396	0.0971553	-3.1286	0.00175795	All	-0.494381	-0.113539	0.0597293	0.664602	0.146186	-0.457357	-0.170833	-0.743881	-3.1286	0.00175641	0.0596772	C4
RLN2	-0.143207	0.202273	-0.70799	0.478957	All	-0.539655	0.253241	0.800815	0.664602	0.304352	-0.215478	0.381052	-0.812009	-0.70799	0.478951	0.800799	C4
RNASE1	0.0188013	0.0500683	0.375513	0.707282	All	-0.0793308	0.116933	0.898726	0.664602	0.0753358	0.0282895	0.175948	-0.119369	0.375513	0.707279	0.898722	C4
RNASE4	-0.00546003	0.0529433	-0.10313	0.917861	All	-0.109227	0.0983069	0.974395	0.664602	0.0796617	-0.00821548	0.147921	-0.164352	-0.10313	0.91786	0.974394	C4
RNASE6	0.0864241	0.0604493	1.4297	0.152814	All	-0.0320544	0.204903	0.547368	0.664602	0.0909557	0.130039	0.308312	-0.0482343	1.4297	0.152805	0.547328	C4
RICTOR	0.136733	0.0919354	1.48727	0.136953	All	-0.0434571	0.316923	0.525623	0.664602	0.138332	0.205737	0.476866	-0.0653932	1.48727	0.136943	0.525555	C4
RNF31	0.0372441	0.069935	0.532553	0.594347	All	-0.099826	0.174314	0.853965	0.664602	0.105228	0.0560397	0.262287	-0.150208	0.532553	0.594343	0.853957	C4
RPA2	0.00740896	0.0577368	0.128323	0.897894	All	-0.105753	0.120571	0.967459	0.664602	0.0868743	0.011148	0.181422	-0.159126	0.128323	0.897893	0.967457	C4
SELL	0.0178389	0.0442319	0.403304	0.686727	All	-0.068854	0.104532	0.889881	0.664602	0.0665539	0.0268415	0.157287	-0.103604	0.403304	0.686725	0.889878	C4
TF	-0.0998513	0.0418088	-2.38828	0.0169328	All	-0.181795	-0.0179076	0.219251	0.664602	0.0629081	-0.150242	-0.0269426	-0.273542	-2.38828	0.0169272	0.219179	C4
TERF1	0.0818339	0.0556548	1.47039	0.141467	All	-0.0272474	0.190915	0.530815	0.664602	0.0837415	0.123132	0.287266	-0.0410011	1.47039	0.141457	0.530748	C4
TCN1	-0.034208	0.0632733	-0.540639	0.58876	All	-0.158221	0.0898053	0.851381	0.664602	0.0952048	-0.0514715	0.13513	-0.238073	-0.540639	0.588756	0.851375	C4
TBCA	-0.0634417	0.16017	-0.396091	0.692041	All	-0.377369	0.250485	0.891316	0.664602	0.241001	-0.0954583	0.376904	-0.56782	-0.396091	0.692038	0.891312	C4
SYAP1	-0.0759347	0.106694	-0.711704	0.476653	All	-0.285051	0.133182	0.799988	0.664602	0.160539	-0.114256	0.2004	-0.428912	-0.711704	0.476648	0.79998	C4
SUSD5	0.0107578	0.0649771	0.165562	0.868502	All	-0.116595	0.138111	0.96269	0.664602	0.0977684	0.0161868	0.207813	-0.175439	0.165562	0.868501	0.962689	C4
TGOLN2	0.0921878	0.0501996	1.83642	0.0663039	All	-0.00620161	0.190577	0.405314	0.664602	0.0755333	0.138711	0.286757	-0.00933404	1.83642	0.0662948	0.405258	C4
THSD1	0.115044	0.0631982	1.82036	0.0687131	All	-0.00882266	0.23891	0.410873	0.664602	0.0950919	0.173102	0.359482	-0.0132785	1.82036	0.068704	0.410818	C4
TGFBR1	0.0340716	0.0410862	0.829272	0.406957	All	-0.0464558	0.114599	0.766684	0.664602	0.0618207	0.0512662	0.172435	-0.0699025	0.829272	0.406951	0.766673	C4
SUMF1	0.123245	0.124598	0.989141	0.322601	All	-0.120962	0.367451	0.710355	0.664602	0.187477	0.185441	0.552896	-0.182014	0.989141	0.322594	0.710339	C4
SPINK2	0.0764385	0.067977	1.12447	0.26082	All	-0.0567941	0.209671	0.662362	0.664602	0.102282	0.115014	0.315487	-0.0854595	1.12447	0.260812	0.662328	C4
SPRED2	0.221541	0.0824997	2.68535	0.00724893	All	0.0598445	0.383237	0.142942	0.664602	0.124134	0.333344	0.576646	0.0900411	2.68535	0.00724529	0.142808	C4
SPART	-0.0374151	0.144844	-0.258313	0.796167	All	-0.321304	0.246474	0.936463	0.664602	0.217941	-0.056297	0.370867	-0.483461	-0.258313	0.796165	0.936461	C4
SOD3	0.0510405	0.113601	0.449298	0.65322	All	-0.171613	0.273694	0.877067	0.664602	0.17093	0.0767987	0.411822	-0.258225	0.449298	0.653217	0.877064	C4
STX7	-0.0290328	0.0925633	-0.313654	0.753786	All	-0.210454	0.152388	0.918549	0.664602	0.139276	-0.0436845	0.229297	-0.316666	-0.313654	0.753784	0.918546	C4
STX5	0.149351	0.0764772	1.95288	0.0508421	All	-0.000541634	0.299243	0.363843	0.664602	0.115072	0.224722	0.450264	-0.000819119	1.95288	0.0508336	0.363745	C4
STAT2	0.07107	0.143557	0.495064	0.620558	All	-0.210297	0.352437	0.863137	0.664602	0.216005	0.106936	0.530306	-0.316433	0.495064	0.620555	0.863133	C4
ST8SIA1	0.14242	0.0921128	1.54615	0.122079	All	-0.038118	0.322957	0.510021	0.664602	0.138598	0.214293	0.485946	-0.0573596	1.54615	0.122069	0.509957	C4
ST13	-0.0961281	0.104229	-0.922275	0.356392	All	-0.300414	0.108158	0.734573	0.664602	0.15683	-0.14464	0.162746	-0.452027	-0.922275	0.356385	0.73456	C4
SSBP1	0.0886443	0.0665486	1.33202	0.182862	All	-0.0417885	0.219077	0.582388	0.664602	0.100133	0.13338	0.32964	-0.0628811	1.33202	0.182852	0.582334	C4
TTR	-0.16174	0.0476761	-3.39248	0.00069345	All	-0.255183	-0.0682967	0.0308441	0.664602	0.0717363	-0.243364	-0.102761	-0.383967	-3.39248	0.000692633	0.0308129	C4
TXN	0.0725738	0.0837102	0.866965	0.385968	All	-0.0914952	0.236643	0.753036	0.664602	0.125955	0.109199	0.356071	-0.137674	0.866965	0.385961	0.753024	C4
UBE2Z	0.273453	0.11117	2.45977	0.0139076	All	0.0555638	0.491342	0.201206	0.664602	0.167273	0.411454	0.739309	0.0835986	2.45977	0.0139025	0.201142	C4
TSPYL1	0.0599299	0.0757673	0.790973	0.428966	All	-0.0885714	0.208431	0.778256	0.664602	0.114004	0.0901742	0.313622	-0.133274	0.790973	0.42896	0.778236	C4
TSC1	0.424106	0.142947	2.96688	0.00301051	All	0.143936	0.704276	0.0822413	0.664602	0.215086	0.638135	1.0597	0.216567	2.96688	0.00300835	0.0821532	C4
TREML1	0.0971816	0.101146	0.960801	0.336659	All	-0.101062	0.295425	0.720351	0.664602	0.152191	0.146225	0.44452	-0.152069	0.960801	0.336652	0.720327	C4
TRAF3	-0.0107976	0.0701737	-0.15387	0.877713	All	-0.148336	0.12674	0.964386	0.664602	0.105588	-0.0162467	0.190705	-0.223198	-0.15387	0.877712	0.964384	C4
TYRP1	-0.000330239	0.115175	-0.00286729	0.997712	All	-0.226069	0.225408	0.998735	0.664602	0.173299	-0.000496898	0.339169	-0.340163	-0.00286729	0.997712	0.998735	C4
VASP	-0.0798126	0.138706	-0.575408	0.565019	All	-0.351672	0.192046	0.842913	0.664602	0.208706	-0.120091	0.288972	-0.529154	-0.575408	0.565015	0.842908	C4
VNN1	-0.351125	0.143942	-2.43935	0.0147188	All	-0.633246	-0.0690043	0.20837	0.664602	0.216584	-0.528324	-0.10382	-0.952828	-2.43935	0.0147135	0.20825	C4
VEGFB	0.084818	0.0559107	1.51703	0.12927	All	-0.024765	0.194401	0.51753	0.664602	0.0841266	0.127622	0.29251	-0.0372659	1.51703	0.12926	0.517459	C4
VAMP8	0.0314076	0.164281	0.191182	0.848384	All	-0.290578	0.353393	0.956849	0.664602	0.247188	0.0472578	0.531746	-0.43723	0.191182	0.848383	0.956848	C4
UROD	-0.145967	0.129397	-1.12805	0.259306	All	-0.399581	0.107647	0.661411	0.664602	0.194699	-0.219631	0.161979	-0.601241	-1.12805	0.259298	0.661365	C4
UNC5D	0.118071	0.0501994	2.35205	0.0186763	All	0.0196823	0.21646	0.231875	0.664602	0.0755331	0.177657	0.325702	0.0296125	2.35205	0.0186704	0.231758	C4
UBXN1	0.0213378	0.128931	0.165497	0.868554	All	-0.231363	0.274039	0.96269	0.664602	0.193998	0.0321061	0.412342	-0.34813	0.165497	0.868553	0.962689	C4
TPSG1	0.0738978	0.04982	1.4833	0.138005	All	-0.0237476	0.171543	0.525956	0.664602	0.0749621	0.111191	0.258117	-0.0357347	1.4833	0.137996	0.525888	C4
TNFAIP8L2	-0.00958867	0.119151	-0.080475	0.93586	All	-0.24312	0.223943	0.979435	0.664602	0.179282	-0.0144277	0.336964	-0.36582	-0.080475	0.935859	0.979435	C4
TNFRSF17	0.117785	0.0770729	1.52823	0.126465	All	-0.033275	0.268845	0.513274	0.664602	0.115968	0.177226	0.404525	-0.0500718	1.52823	0.126456	0.513201	C4
TLR4	0.0978264	0.0533563	1.83345	0.0667441	All	-0.00675008	0.202403	0.406121	0.664602	0.0802831	0.147195	0.30455	-0.0101595	1.83345	0.066735	0.406018	C4
TLR1	0.0465523	0.0493955	0.942441	0.345974	All	-0.0502611	0.143366	0.726242	0.664602	0.0743235	0.0700455	0.215719	-0.0756285	0.942441	0.345967	0.72621	C4
TPD52L2	-0.214101	0.202383	-1.0579	0.29011	All	-0.610765	0.182563	0.689937	0.664602	0.304518	-0.322149	0.274707	-0.919004	-1.0579	0.290103	0.689918	C4
TP53I3	-0.100554	0.0984966	-1.02089	0.307315	All	-0.293604	0.0924957	0.70063	0.664602	0.148204	-0.1513	0.13918	-0.441779	-1.02089	0.307307	0.700613	C4
TP53BP1	0.281192	0.16497	1.7045	0.0882964	All	-0.0421433	0.604528	0.454229	0.664602	0.248224	0.423099	0.909618	-0.0634203	1.7045	0.088287	0.454181	C4
TOP2B	-0.040798	0.14941	-0.273061	0.784808	All	-0.333635	0.25204	0.930878	0.664602	0.224811	-0.0613871	0.379242	-0.502016	-0.273061	0.784806	0.930876	C4
PSMG4	0.147584	0.106547	1.38516	0.166013	All	-0.0612434	0.356411	0.564432	0.664602	0.160316	0.222064	0.536284	-0.0921562	1.38516	0.166004	0.564381	C4
MDH1	0.023384	0.0770091	0.303653	0.761394	All	-0.127551	0.174319	0.921367	0.664602	0.115872	0.035185	0.262295	-0.191925	0.303653	0.761392	0.921365	C4
MENT	0.111797	0.043268	2.58382	0.00977548	All	0.0269931	0.1966	0.167041	0.664602	0.0651036	0.168216	0.295819	0.0406131	2.58382	0.0097712	0.166968	C4
MFAP4	-0.0611942	0.0609197	-1.00451	0.315142	All	-0.180595	0.0582063	0.706163	0.664602	0.0916635	-0.0920765	0.087584	-0.271737	-1.00451	0.315135	0.706132	C4
MARS1	-0.0283645	0.159358	-0.177992	0.85873	All	-0.3407	0.283971	0.960102	0.664602	0.23978	-0.0426789	0.427289	-0.512647	-0.177992	0.858729	0.9601	C4
LYVE1	0.00740872	0.0376044	0.197018	0.843815	All	-0.0662945	0.0811119	0.955761	0.664602	0.0565818	0.0111476	0.122048	-0.0997527	0.197018	0.843814	0.955759	C4
LZTFL1	-0.152903	0.133837	-1.14246	0.253273	All	-0.415218	0.109413	0.658028	0.664602	0.201379	-0.230067	0.164636	-0.62477	-1.14246	0.253264	0.658007	C4
MBL2	-0.474594	0.204667	-2.31886	0.0204086	All	-0.875734	-0.0734545	0.243933	0.664602	0.307954	-0.714103	-0.110513	-1.31769	-2.31886	0.0204025	0.243869	C4
MCEMP1	0.330794	0.169781	1.94835	0.0513813	All	-0.00197138	0.663559	0.365089	0.664602	0.255463	0.497732	0.99844	-0.00297545	1.94835	0.0513728	0.365037	C4
MYOM3	-0.20172	0.174071	-1.15884	0.24653	All	-0.542893	0.139452	0.6525	0.664602	0.261917	-0.303521	0.209838	-0.816879	-1.15884	0.246521	0.652477	C4
NAGA	0.0912329	0.111463	0.818507	0.413073	All	-0.12723	0.309696	0.769112	0.664602	0.167713	0.137275	0.465993	-0.191443	0.818507	0.413068	0.769092	C4
NAGPA	-0.0880573	0.0402417	-2.18821	0.0286613	All	-0.16693	-0.00918502	0.281427	0.664602	0.0605501	-0.132496	-0.0138182	-0.251175	-2.18821	0.0286543	0.281299	C4
MXRA8	0.114173	0.0600182	1.90231	0.0571398	All	-0.00346047	0.231806	0.384083	0.664602	0.090307	0.171792	0.348793	-0.00521008	1.90231	0.057131	0.384032	C4
NDUFA5	-0.0118231	0.0664225	-0.177998	0.858726	All	-0.142009	0.118363	0.960102	0.664602	0.0999433	-0.0177897	0.178099	-0.213678	-0.177998	0.858725	0.9601	C4
NECTIN1	0.0439904	0.0612818	0.717838	0.472862	All	-0.0761197	0.1641	0.797771	0.664602	0.0922083	0.0661906	0.246919	-0.114538	0.717838	0.472857	0.797755	C4
MOCS2	-0.0647709	0.125731	-0.515152	0.60645	All	-0.3112	0.181658	0.859339	0.664602	0.189183	-0.0974582	0.273341	-0.468257	-0.515152	0.606446	0.859331	C4
MKI67	0.135733	0.0755289	1.79709	0.0723298	All	-0.0123013	0.283766	0.419896	0.664602	0.113645	0.204231	0.426976	-0.0185134	1.79709	0.0723206	0.419843	C4
MRC1	-0.0114935	0.0565385	-0.203287	0.838912	All	-0.122307	0.0993199	0.95391	0.664602	0.0850712	-0.0172938	0.149446	-0.184033	-0.203287	0.838911	0.953908	C4
MRPS16	0.0501961	0.0564415	0.889347	0.373823	All	-0.0604272	0.160819	0.747646	0.664602	0.0849253	0.0755281	0.241982	-0.0909255	0.889347	0.373816	0.747633	C4
MST1	0.0525141	0.123907	0.423819	0.671701	All	-0.190339	0.295368	0.884502	0.664602	0.186438	0.0790159	0.444435	-0.286403	0.423819	0.671698	0.884498	C4
MTDH	0.017959	0.173779	0.103344	0.917691	All	-0.322642	0.35856	0.974395	0.664602	0.261479	0.0270222	0.53952	-0.485476	0.103344	0.91769	0.974394	C4
NEDD4L	0.021694	0.0905094	0.239688	0.810573	All	-0.155701	0.199089	0.942997	0.664602	0.136186	0.0326422	0.299566	-0.234282	0.239688	0.810572	0.942996	C4
KLKB1	-0.0161586	0.0468612	-0.344818	0.730233	All	-0.108005	0.0756876	0.91004	0.664602	0.0705102	-0.0243132	0.113887	-0.162513	-0.344818	0.730231	0.910038	C4
KLK7	-0.0321051	0.0707682	-0.453666	0.650072	All	-0.170808	0.106598	0.876293	0.664602	0.106482	-0.0483073	0.160398	-0.257012	-0.453666	0.650069	0.876289	C4
KLRF1	0.0831828	0.0767058	1.08444	0.278178	All	-0.0671579	0.233523	0.67965	0.664602	0.115416	0.125162	0.351378	-0.101054	1.08444	0.27817	0.67963	C4
INSR	-0.0272072	0.031559	-0.862105	0.388636	All	-0.0890618	0.0346474	0.755217	0.664602	0.0474856	-0.0409376	0.0521343	-0.134009	-0.862105	0.38863	0.755205	C4
ITGA2	-0.0477437	0.0639428	-0.746663	0.455273	All	-0.173069	0.0775819	0.790751	0.664602	0.0962122	-0.071838	0.116738	-0.260414	-0.746663	0.455267	0.790742	C4
ITGAL	0.125506	0.0817224	1.53576	0.124607	All	-0.034667	0.285679	0.5109	0.664602	0.122965	0.188844	0.429854	-0.0521665	1.53576	0.124597	0.51086	C4
ITIH1	-0.0261905	0.0356766	-0.734109	0.462887	All	-0.0961154	0.0437344	0.7942	0.664602	0.0536812	-0.0394079	0.0658073	-0.144623	-0.734109	0.462882	0.794184	C4
ITIH4	0.0309473	0.0496534	0.623267	0.533113	All	-0.0663716	0.128266	0.827958	0.664602	0.0747115	0.0465652	0.193	-0.0998693	0.623267	0.533109	0.827947	C4
JAM3	-0.0677397	0.0945731	-0.716269	0.473831	All	-0.2531	0.11762	0.797771	0.664602	0.1423	-0.101925	0.176983	-0.380834	-0.716269	0.473825	0.797755	C4
KDM3A	0.607665	0.174065	3.49102	0.000481803	All	0.266504	0.948827	0.0244616	0.664602	0.261909	0.91433	1.42767	0.400989	3.49102	0.000481172	0.0244021	C4
LPA	-3.74661	0.337239	-11.1097	1.26628e-28	All	-4.40758	-3.08563	3.70008e-25	0.664602	0.50743	-5.63737	-4.64281	-6.63193	-11.1097	1.12589e-28	3.28987e-25	C4
LRG1	0.0922148	0.0508095	1.81491	0.0695462	All	-0.0073699	0.191799	0.413317	0.664602	0.076451	0.138752	0.288596	-0.0110919	1.81491	0.0695371	0.413262	C4
LRIG3	0.102751	0.0526905	1.95008	0.0511753	All	-0.000520901	0.206022	0.364718	0.664602	0.0792813	0.154605	0.309996	-0.000786634	1.95008	0.0511668	0.364657	C4
LCAT	-0.0972353	0.0442038	-2.1997	0.0278348	All	-0.183873	-0.0105974	0.278221	0.664602	0.0665117	-0.146306	-0.0159431	-0.276669	-2.1997	0.0278279	0.278152	C4
LEG1	-0.104678	0.125221	-0.835942	0.403194	All	-0.350108	0.140752	0.762874	0.664602	0.188416	-0.157505	0.21179	-0.5268	-0.835942	0.403188	0.762862	C4
LATS1	-0.0418733	0.158976	-0.263393	0.792249	All	-0.353461	0.269715	0.934831	0.664602	0.239205	-0.0630051	0.405838	-0.531848	-0.263393	0.792248	0.934827	C4
LGALS3BP	-0.213239	0.0616243	-3.46031	0.000540231	All	-0.334021	-0.092458	0.0263507	0.664602	0.0927236	-0.320853	-0.139114	-0.502591	-3.46031	0.000539546	0.026322	C4
PLCB1	0.165632	0.083878	1.97468	0.048313	All	0.00123425	0.33003	0.354403	0.664602	0.126208	0.24922	0.496588	0.00185259	1.97468	0.0483046	0.354342	C4
PLG	0.0035614	0.0426095	0.0835823	0.933389	All	-0.0799517	0.0870745	0.978602	0.664602	0.0641128	0.0053587	0.13102	-0.120302	0.0835823	0.933389	0.978601	C4
PGA4	-0.0413557	0.135946	-0.304208	0.760972	All	-0.307804	0.225093	0.921307	0.664602	0.204552	-0.0622262	0.338696	-0.463148	-0.304208	0.76097	0.921305	C4
PGLYRP2	-0.00648232	0.0575218	-0.112693	0.910275	All	-0.119223	0.106258	0.972162	0.664602	0.0865508	-0.00975369	0.159886	-0.179393	-0.112693	0.910274	0.97216	C4
PGR	0.588088	0.19762	2.97585	0.0029239	All	0.20076	0.975417	0.0811104	0.664602	0.297351	0.884873	1.46768	0.302065	2.97585	0.00292177	0.0810514	C4
PHYKPL	0.00100759	0.07868	0.0128062	0.989782	All	-0.153202	0.155218	0.996785	0.664602	0.118387	0.00151608	0.233554	-0.230522	0.0128062	0.989782	0.996785	C4
PI16	0.0450743	0.0468858	0.961363	0.336377	All	-0.0468202	0.136969	0.720351	0.664602	0.0705472	0.0678215	0.206094	-0.0704511	0.961363	0.33637	0.720327	C4
PF4	0.0170813	0.185891	0.0918886	0.926787	All	-0.347258	0.381421	0.975947	0.664602	0.279703	0.0257015	0.573919	-0.522516	0.0918886	0.926787	0.975946	C4
PIKFYVE	0.0408437	0.103826	0.393387	0.694036	All	-0.162651	0.244338	0.891826	0.664602	0.156222	0.0614559	0.367652	-0.24474	0.393387	0.694033	0.891822	C4
PINLYP	-0.14881	0.129133	-1.15238	0.249174	All	-0.401905	0.104286	0.655235	0.664602	0.194301	-0.223908	0.156922	-0.604738	-1.15238	0.249166	0.655199	C4
PNLIP	-0.100408	0.118882	-0.844606	0.398337	All	-0.333412	0.132596	0.760911	0.664602	0.178877	-0.15108	0.199518	-0.501679	-0.844606	0.398331	0.760897	C4
PRR5	0.0789378	0.0868717	0.908671	0.363531	All	-0.0913276	0.249203	0.738227	0.664602	0.130712	0.118775	0.374971	-0.137422	0.908671	0.363524	0.738213	C4
PRKG1	-0.0882546	0.23531	-0.375057	0.707621	All	-0.549454	0.372945	0.898726	0.664602	0.354062	-0.132793	0.561168	-0.826755	-0.375057	0.707618	0.898722	C4
PROS1	-0.0949899	0.0484567	-1.96031	0.0499685	All	-0.189963	-1.655e-05	0.361168	0.664602	0.0729108	-0.142928	-2.22763e-05	-0.285833	-1.96031	0.0499601	0.361054	C4
PRR4	0.166773	0.130493	1.27803	0.201249	All	-0.0889876	0.422534	0.606444	0.664602	0.196347	0.250937	0.635777	-0.133903	1.27803	0.20124	0.606417	C4
PRSS22	0.000713845	0.0667373	0.0106963	0.991466	All	-0.130089	0.131516	0.997382	0.664602	0.100417	0.00107409	0.197891	-0.195743	0.0106963	0.991466	0.997382	C4
PRDX2	-0.0525592	0.116094	-0.45273	0.650746	All	-0.280099	0.174981	0.876667	0.664602	0.174682	-0.0790837	0.263293	-0.42146	-0.45273	0.650743	0.876663	C4
POF1B	0.0538531	0.0855841	0.629242	0.529195	All	-0.113889	0.221595	0.825938	0.664602	0.128775	0.0810306	0.33343	-0.171368	0.629242	0.52919	0.825923	C4
POLR2A	0.0762804	0.0545507	1.39834	0.162021	All	-0.030637	0.183198	0.558498	0.664602	0.0820803	0.114776	0.275653	-0.0461012	1.39834	0.162011	0.558466	C4
PON1	0.0265157	0.0505202	0.524853	0.599689	All	-0.0725021	0.125534	0.857398	0.664602	0.0760158	0.0398971	0.188888	-0.109094	0.524853	0.599685	0.857388	C4
PPBP	-0.0270184	0.161199	-0.167609	0.866892	All	-0.342962	0.288925	0.962408	0.664602	0.242549	-0.0406536	0.434743	-0.51605	-0.167609	0.86689	0.962407	C4
PPL	-0.0872463	0.0617417	-1.41309	0.15764	All	-0.208258	0.0337652	0.551918	0.664602	0.0929003	-0.131276	0.0508085	-0.313361	-1.41309	0.157631	0.551865	C4
PPM1B	0.363761	0.119433	3.04574	0.00232295	All	0.129677	0.597844	0.0696061	0.664602	0.179706	0.547336	0.899559	0.195113	3.04574	0.00232111	0.0695173	C4
PER3	0.0190961	0.224379	0.0851067	0.932177	All	-0.420678	0.45887	0.978153	0.664602	0.337614	0.0287332	0.690456	-0.63299	0.0851067	0.932177	0.978152	C4
NPM1	0.0395048	0.0655582	0.60259	0.546785	All	-0.088987	0.167997	0.834399	0.664602	0.0986429	0.0594412	0.252781	-0.133899	0.60259	0.546781	0.834385	C4
NRGN	-0.0785499	0.173846	-0.451836	0.65139	All	-0.419282	0.262182	0.877067	0.664602	0.261579	-0.118191	0.394504	-0.630886	-0.451836	0.651387	0.877064	C4
NPHS1	0.060674	0.0634743	0.955883	0.339138	All	-0.0637333	0.185081	0.721665	0.664602	0.0955073	0.0912938	0.278488	-0.0959005	0.955883	0.339131	0.721641	C4
NUMB	-0.0344713	0.155176	-0.222143	0.824204	All	-0.338611	0.269668	0.947097	0.664602	0.233487	-0.0518676	0.405767	-0.509502	-0.222143	0.824202	0.947096	C4
NXPH3	0.129668	0.0575036	2.25495	0.0241428	All	0.016963	0.242373	0.263228	0.664602	0.0865235	0.195106	0.364692	0.0255204	2.25495	0.0241362	0.263157	C4
NPHS2	0.163856	0.195589	0.837754	0.402175	All	-0.219492	0.547204	0.762094	0.664602	0.294296	0.246547	0.823367	-0.330272	0.837754	0.402169	0.762073	C4
NEXN	-0.0310065	0.130923	-0.236831	0.81279	All	-0.287611	0.225598	0.943573	0.664602	0.196995	-0.0466543	0.339455	-0.432764	-0.236831	0.812788	0.943571	C4
NFAT5	0.0436223	0.160416	0.271933	0.785676	All	-0.270787	0.358031	0.930878	0.664602	0.241371	0.0656367	0.538724	-0.407451	0.271933	0.785674	0.930876	C4
NHLRC3	-0.165143	0.0610022	-2.70716	0.00678975	All	-0.284705	-0.0455803	0.136533	0.664602	0.0917876	-0.248483	-0.0685796	-0.428387	-2.70716	0.00678625	0.136428	C4
NEDD9	0.176497	0.0634335	2.78239	0.00539903	All	0.0521696	0.300824	0.119515	0.664602	0.0954459	0.265568	0.452642	0.0784941	2.78239	0.00539595	0.119447	C4
NME1	0.0264305	0.0403505	0.655022	0.512458	All	-0.0526551	0.105516	0.818416	0.664602	0.0607138	0.0397689	0.158768	-0.0792302	0.655022	0.512453	0.818402	C4
PDE5A	-0.079446	0.19404	-0.40943	0.682227	All	-0.459758	0.300866	0.888996	0.664602	0.291965	-0.119539	0.452712	-0.691791	-0.40943	0.682224	0.888993	C4
PDIA3	0.0289233	0.0474968	0.608952	0.542561	All	-0.0641687	0.122015	0.833014	0.664602	0.0714665	0.0435197	0.183594	-0.0965547	0.608952	0.542556	0.833007	C4
PDZK1	-0.101778	0.0857895	-1.18637	0.235483	All	-0.269923	0.0663658	0.639877	0.664602	0.129084	-0.153142	0.0998627	-0.406147	-1.18637	0.235474	0.639854	C4
PENK	-0.03433	0.0580907	-0.590972	0.554543	All	-0.148186	0.0795257	0.837282	0.664602	0.0874068	-0.051655	0.119662	-0.222972	-0.590972	0.554539	0.83727	C4
PCOLCE	0.0970493	0.0544613	1.78199	0.074759	All	-0.00969276	0.203791	0.425581	0.664602	0.0819457	0.146026	0.30664	-0.0145873	1.78199	0.0747511	0.425531	C4
OLFM4	-0.246447	0.225813	-1.09138	0.275115	All	-0.689031	0.196138	0.676174	0.664602	0.339771	-0.370818	0.295133	-1.03677	-1.09138	0.275107	0.676137	C4
ORM1	-0.0231355	0.0395056	-0.585625	0.558131	All	-0.100565	0.0542941	0.838548	0.664602	0.0594425	-0.034811	0.0816963	-0.151318	-0.585625	0.558127	0.838537	C4
PALLD	0.0252148	0.0736839	0.342203	0.732201	All	-0.119203	0.169633	0.910858	0.664602	0.110869	0.0379398	0.255244	-0.179364	0.342203	0.732198	0.910852	C4
PAXX	-0.0703668	0.0870998	-0.807886	0.419162	All	-0.241079	0.100346	0.773715	0.664602	0.131056	-0.105878	0.150991	-0.362747	-0.807886	0.419156	0.773704	C4
PCBD1	-0.357112	0.0921784	-3.87414	0.00010721	All	-0.537778	-0.176446	0.00810175	0.664602	0.138697	-0.537332	-0.265486	-0.809179	-3.87414	0.000107003	0.00808607	C4
PEPD	0.0341873	0.0495418	0.69007	0.490155	All	-0.0629128	0.131287	0.806135	0.664602	0.0745436	0.0514403	0.197546	-0.0946651	0.69007	0.49015	0.806127	C4
CDH4	0.0730463	0.0885219	0.825178	0.409277	All	-0.100453	0.246546	0.767522	0.664602	0.133195	0.10991	0.370973	-0.151153	0.825178	0.409271	0.767511	C4
CDH23	0.0412063	0.0515716	0.79901	0.42429	All	-0.0598723	0.142285	0.776802	0.664602	0.0775978	0.0620014	0.214093	-0.0900902	0.79901	0.424284	0.776791	C4
CDH22	0.0163	0.0547206	0.297876	0.765799	All	-0.0909505	0.12355	0.923836	0.664602	0.082336	0.0245259	0.185904	-0.136853	0.297876	0.765798	0.923835	C4
CDC42BPB	-0.049246	0.194607	-0.253053	0.800229	All	-0.430669	0.332177	0.937705	0.664602	0.292818	-0.0740986	0.499825	-0.648022	-0.253053	0.800227	0.937703	C4
CEACAM18	-0.0495285	0.129514	-0.38242	0.702153	All	-0.30337	0.204313	0.895543	0.664602	0.194874	-0.0745236	0.307429	-0.456477	-0.38242	0.70215	0.89554	C4
CEACAM16	-0.185681	0.156506	-1.18642	0.235466	All	-0.492427	0.121065	0.639877	0.664602	0.235488	-0.279387	0.18217	-0.740944	-1.18642	0.235458	0.639854	C4
CDKL5	-0.0357848	0.0996901	-0.35896	0.719627	All	-0.231174	0.159604	0.905577	0.664602	0.15	-0.0538439	0.240156	-0.347843	-0.35896	0.719625	0.905574	C4
CDK5RAP3	-0.148944	0.113665	-1.31037	0.190079	All	-0.371723	0.0738359	0.590932	0.664602	0.171027	-0.22411	0.111104	-0.559324	-1.31037	0.19007	0.590908	C4
CDK1	-0.0269624	0.0684493	-0.393903	0.693655	All	-0.161121	0.107196	0.891826	0.664602	0.102993	-0.0405692	0.161297	-0.242435	-0.393903	0.693653	0.891822	C4
CDC26	0.0959378	0.132833	0.722243	0.47015	All	-0.16441	0.356286	0.797255	0.664602	0.199869	0.144354	0.536096	-0.247389	0.722243	0.470145	0.797239	C4
LUZP2	0.123041	0.0850487	1.44671	0.147987	All	-0.0436515	0.289733	0.538504	0.664602	0.127969	0.185135	0.435955	-0.0656852	1.44671	0.147978	0.538469	C4
CDC25A	-0.0363775	0.0753304	-0.482907	0.629165	All	-0.184022	0.111267	0.866937	0.664602	0.113347	-0.0547358	0.167424	-0.276895	-0.482907	0.629162	0.866927	C4
CDC123	0.140326	0.120782	1.16181	0.245321	All	-0.0964028	0.377055	0.650753	0.664602	0.181736	0.211144	0.567347	-0.14506	1.16181	0.245312	0.650733	C4
CDAN1	-0.0184448	0.0436126	-0.422923	0.672354	All	-0.103924	0.0670344	0.884519	0.664602	0.0656222	-0.0277532	0.100866	-0.156373	-0.422923	0.672351	0.884512	C4
CDA	-0.106333	0.0934081	-1.13837	0.254976	All	-0.289409	0.0767439	0.659133	0.664602	0.140548	-0.159995	0.115479	-0.435468	-1.13837	0.254968	0.659111	C4
CD86	0.0671537	0.0555106	1.20974	0.226386	All	-0.0416452	0.175952	0.630609	0.664602	0.0835246	0.101043	0.264752	-0.0626648	1.20974	0.226377	0.630556	C4
CD82	-0.0809578	0.0788639	-1.02655	0.304639	All	-0.235528	0.0736126	0.697797	0.664602	0.118663	-0.121814	0.110766	-0.354394	-1.02655	0.304632	0.69778	C4
CD80	-0.0397279	0.0652323	-0.609022	0.542514	All	-0.167581	0.088125	0.833014	0.664602	0.0981525	-0.059777	0.132602	-0.252156	-0.609022	0.54251	0.833007	C4
CETN3	-0.0221893	0.147587	-0.150347	0.880491	All	-0.311454	0.267076	0.964486	0.664602	0.222068	-0.0333873	0.401866	-0.468641	-0.150347	0.880491	0.964484	C4
CGN	0.0990792	0.0743691	1.33226	0.182783	All	-0.0466816	0.24484	0.582388	0.664602	0.1119	0.149081	0.368405	-0.070244	1.33226	0.182774	0.582334	C4
CHP1	-0.0636036	0.138688	-0.458611	0.646517	All	-0.335426	0.208219	0.874594	0.664602	0.208678	-0.0957019	0.313307	-0.50471	-0.458611	0.646514	0.874589	C4
CHMP6	-0.168261	0.107867	-1.55989	0.118797	All	-0.379677	0.0431554	0.503712	0.664602	0.162304	-0.253175	0.0649401	-0.57129	-1.55989	0.118787	0.503676	C4
CHM	-0.0902785	0.113539	-0.795133	0.426542	All	-0.31281	0.132253	0.777836	0.664602	0.170837	-0.135838	0.199003	-0.47068	-0.795133	0.426536	0.777816	C4
CHGA	0.13852	0.164905	0.839996	0.400917	All	-0.184688	0.461728	0.762094	0.664602	0.248126	0.208425	0.694752	-0.277902	0.839996	0.40091	0.762073	C4
CHCHD6	-0.0684968	0.0541253	-1.26552	0.205693	All	-0.17458	0.0375869	0.610825	0.664602	0.0814402	-0.103064	0.0565584	-0.262687	-1.26552	0.205684	0.610802	C4
CHCHD10	-0.172121	0.07991	-2.15394	0.0312524	All	-0.328742	-0.0155004	0.295851	0.664602	0.120237	-0.258984	-0.0233185	-0.494649	-2.15394	0.0312451	0.295782	C4
CELA2A	-0.166429	0.115856	-1.43651	0.150866	All	-0.393503	0.0606451	0.543341	0.664602	0.174324	-0.250419	0.0912566	-0.592095	-1.43651	0.150857	0.543307	C4
CENPF	-0.0470853	0.102788	-0.458082	0.646897	All	-0.248546	0.154376	0.874783	0.664602	0.154661	-0.0708475	0.232288	-0.373983	-0.458082	0.646894	0.874776	C4
CEACAM6	-0.125483	0.0799935	-1.56866	0.116736	All	-0.282267	0.0313016	0.501623	0.664602	0.120363	-0.188809	0.0471026	-0.424721	-1.56866	0.116727	0.501581	C4
CEACAM20	-0.0973092	0.0833816	-1.16703	0.243205	All	-0.260734	0.0661158	0.649625	0.664602	0.125461	-0.146417	0.0994863	-0.392321	-1.16703	0.243196	0.649606	C4
CEND1	-0.00842408	0.110752	-0.0760629	0.93937	All	-0.225493	0.208645	0.981468	0.664602	0.166643	-0.0126754	0.313946	-0.339297	-0.0760629	0.939369	0.981468	C4
CEP290	0.0153715	0.100319	0.153226	0.878221	All	-0.181251	0.211994	0.964386	0.664602	0.150947	0.0231289	0.318984	-0.272727	0.153226	0.87822	0.964384	C4
CEP350	-0.140669	0.0695001	-2.02401	0.042977	All	-0.276887	-0.00445131	0.33923	0.664602	0.104574	-0.211659	-0.00669395	-0.416624	-2.02401	0.042969	0.339127	C4
CENPJ	0.0729036	0.133383	0.546575	0.584674	All	-0.188521	0.334329	0.848552	0.664602	0.200695	0.109695	0.503058	-0.283668	0.546575	0.584671	0.848547	C4
CEP170	0.0477063	0.142369	0.33509	0.737559	All	-0.231331	0.326743	0.912148	0.664602	0.214216	0.0717818	0.491646	-0.348082	0.33509	0.737557	0.912143	C4
CEP152	0.0223828	0.079591	0.281223	0.778541	All	-0.133613	0.178378	0.929035	0.664602	0.119757	0.0336785	0.268403	-0.201046	0.281223	0.77854	0.929033	C4
CEP112	0.00867592	0.0841697	0.103076	0.917903	All	-0.156294	0.173646	0.974395	0.664602	0.126647	0.0130543	0.261282	-0.235174	0.103076	0.917902	0.974394	C4
CEACAM19	-0.0579852	0.076259	-0.760371	0.447038	All	-0.20745	0.0914798	0.787154	0.664602	0.114744	-0.087248	0.13765	-0.312146	-0.760371	0.447033	0.787139	C4
MICALL2	-0.203781	0.128503	-1.58581	0.112793	All	-0.455642	0.0480804	0.495725	0.664602	0.193353	-0.306621	0.0723517	-0.685594	-1.58581	0.112783	0.495647	C4
MINDY1	-0.192501	0.204391	-0.941828	0.346288	All	-0.5931	0.208098	0.726242	0.664602	0.307539	-0.289649	0.313128	-0.892425	-0.941828	0.346281	0.72621	C4
MINK1	-0.159937	0.176021	-0.908624	0.363555	All	-0.504933	0.185058	0.738227	0.664602	0.264853	-0.240651	0.27846	-0.759762	-0.908624	0.363548	0.738213	C4
MFAP3L	-0.064456	0.125096	-0.515254	0.606379	All	-0.309639	0.180727	0.859339	0.664602	0.188226	-0.0969843	0.271939	-0.465908	-0.515254	0.606376	0.859331	C4
MEGF11	-0.0211529	0.0615728	-0.343544	0.731192	All	-0.141833	0.0995274	0.910431	0.664602	0.0926461	-0.031828	0.149758	-0.213414	-0.343544	0.731189	0.910425	C4
MELTF	-0.0164105	0.0562618	-0.291681	0.770533	All	-0.126682	0.0938606	0.926549	0.664602	0.0846549	-0.0246922	0.141231	-0.190616	-0.291681	0.770531	0.926547	C4
MEP1A	-0.331967	0.136378	-2.43416	0.0149316	All	-0.599264	-0.0646703	0.209654	0.664602	0.205203	-0.499498	-0.0972994	-0.901696	-2.43416	0.0149263	0.209492	C4
MORC3	-0.0270694	0.0547191	-0.494698	0.620817	All	-0.134317	0.080178	0.863137	0.664602	0.0823336	-0.0407302	0.120644	-0.202104	-0.494698	0.620814	0.863133	C4
MORF4L1	-0.0638913	0.0767648	-0.832299	0.405246	All	-0.214348	0.086565	0.764828	0.664602	0.115505	-0.0961347	0.130255	-0.322524	-0.832299	0.40524	0.764807	C4
MORF4L2	0.121966	0.0702742	1.73558	0.082648	All	-0.0157686	0.259701	0.441646	0.664602	0.105739	0.183518	0.390766	-0.0237302	1.73558	0.0826386	0.441552	C4
MORN4	0.232873	0.146321	1.59152	0.111501	All	-0.0539103	0.519656	0.494641	0.664602	0.220163	0.350394	0.781913	-0.0811247	1.59152	0.111492	0.494548	C4
MNAT1	-0.0267654	0.0844034	-0.317113	0.75116	All	-0.192193	0.138662	0.917808	0.664602	0.126998	-0.0402729	0.208644	-0.28919	-0.317113	0.751158	0.917806	C4
MPRIP	0.100006	0.0835614	1.1968	0.231393	All	-0.063771	0.263784	0.635063	0.664602	0.125732	0.150475	0.396909	-0.0959583	1.1968	0.231384	0.63504	C4
MMP15	0.0603712	0.0963086	0.626851	0.530761	All	-0.12839	0.249133	0.826883	0.664602	0.144912	0.0908381	0.374865	-0.193189	0.626851	0.530757	0.826868	C4
MLLT1	-0.115607	0.12837	-0.900573	0.367822	All	-0.367208	0.135994	0.74259	0.664602	0.193154	-0.173949	0.204632	-0.55253	-0.900573	0.367815	0.742577	C4
MN1	0.00713266	0.110015	0.0648334	0.948307	All	-0.208493	0.222758	0.983538	0.664602	0.165535	0.0107322	0.335182	-0.313717	0.0648334	0.948307	0.983537	C4
MMUT	0.0505065	0.0933433	0.541084	0.588454	All	-0.132443	0.233456	0.851381	0.664602	0.14045	0.0759952	0.351277	-0.199287	0.541084	0.58845	0.851375	C4
MRI1	-0.0886269	0.126319	-0.701613	0.482925	All	-0.336207	0.158953	0.802646	0.664602	0.190067	-0.133353	0.239177	-0.505884	-0.701613	0.48292	0.802628	C4
MAMDC2	-0.164215	0.0666447	-2.46403	0.0137434	All	-0.294836	-0.0335936	0.200786	0.664602	0.100278	-0.247087	-0.0505433	-0.443632	-2.46403	0.0137383	0.200648	C4
MAMDC4	-0.172053	0.107249	-1.60423	0.108673	All	-0.382257	0.0381522	0.490977	0.664602	0.161374	-0.258881	0.057412	-0.575174	-1.60423	0.108663	0.490907	C4
MAN1A2	-0.0213327	0.0479379	-0.445007	0.656318	All	-0.115289	0.0726239	0.877719	0.664602	0.0721303	-0.0320984	0.109277	-0.173474	-0.445007	0.656315	0.877712	C4
MAN2B2	-0.593888	0.115519	-5.14102	2.74813e-07	All	-0.820302	-0.367474	8.60255e-05	0.664602	0.173817	-0.893599	-0.552917	-1.23428	-5.14102	2.73249e-07	8.512e-05	C4
MANEAL	-0.0460834	0.0938647	-0.490955	0.623461	All	-0.230055	0.137888	0.86462	0.664602	0.141235	-0.0693399	0.20748	-0.34616	-0.490955	0.623458	0.864615	C4
MAG	-0.0186494	0.088672	-0.210319	0.83342	All	-0.192443	0.155145	0.951559	0.664602	0.133421	-0.0280611	0.233445	-0.289567	-0.210319	0.833418	0.951558	C4
MANSC4	0.0613186	0.124115	0.494048	0.621276	All	-0.181942	0.304579	0.863503	0.664602	0.18675	0.0922636	0.458294	-0.273767	0.494048	0.621272	0.863495	C4
MAP1LC3A	-0.0224057	0.0591014	-0.379107	0.704611	All	-0.138242	0.0934309	0.896983	0.664602	0.0889276	-0.033713	0.140585	-0.208011	-0.379107	0.704609	0.896979	C4
MAP1LC3B2	-0.114276	0.123024	-0.928897	0.352949	All	-0.355398	0.126846	0.732643	0.664602	0.185109	-0.171947	0.190866	-0.53476	-0.928897	0.352942	0.732629	C4
MAP2	-0.0749416	0.0878678	-0.85289	0.393726	All	-0.247159	0.0972762	0.757053	0.664602	0.132211	-0.112762	0.146372	-0.371896	-0.85289	0.39372	0.757041	C4
MAGEA3	-0.281759	0.161234	-1.74751	0.0805574	All	-0.597773	0.0342541	0.438613	0.664602	0.242603	-0.423952	0.0515495	-0.899454	-1.74751	0.0805481	0.438562	C4
LYSMD3	-0.0616915	0.192423	-0.320604	0.748513	All	-0.438833	0.31545	0.916664	0.664602	0.289531	-0.0928247	0.474656	-0.660306	-0.320604	0.748511	0.916659	C4
LYPLA2	0.0476355	0.199779	0.238441	0.811541	All	-0.343924	0.439195	0.943317	0.664602	0.3006	0.0716752	0.660851	-0.5175	0.238441	0.811539	0.943314	C4
LYZL2	-0.0108171	0.0676265	-0.159953	0.872919	All	-0.143363	0.121729	0.963608	0.664602	0.101755	-0.016276	0.183164	-0.215716	-0.159953	0.872918	0.963607	C4
M6PR	-0.0794003	0.0753211	-1.05416	0.291818	All	-0.227027	0.0682263	0.691607	0.664602	0.113333	-0.119471	0.102661	-0.341603	-1.05416	0.29181	0.691591	C4
MAP2K1	-0.0239246	0.122079	-0.195977	0.844629	All	-0.263194	0.215345	0.955761	0.664602	0.183687	-0.0359984	0.324028	-0.396025	-0.195977	0.844628	0.955759	C4
MCEE	-0.074299	0.0807504	-0.920107	0.357524	All	-0.232567	0.0839689	0.734573	0.664602	0.121502	-0.111795	0.126349	-0.349938	-0.920107	0.357517	0.73456	C4
MCTS1	-0.0514899	0.0501857	-1.02599	0.304905	All	-0.149852	0.0468723	0.697861	0.664602	0.0755125	-0.0774749	0.0705296	-0.225479	-1.02599	0.304898	0.697841	C4
MDM1	-0.0473252	0.0579247	-0.817013	0.413927	All	-0.160855	0.066205	0.769888	0.664602	0.0871569	-0.0712084	0.0996192	-0.242036	-0.817013	0.413921	0.769877	C4
MECR	-0.119429	0.171587	-0.696029	0.486415	All	-0.455733	0.216874	0.804209	0.664602	0.25818	-0.179701	0.326331	-0.685733	-0.696029	0.486411	0.804201	C4
MAPK13	-0.0276985	0.0823866	-0.336201	0.736721	All	-0.189173	0.133776	0.912032	0.664602	0.123964	-0.0416768	0.201292	-0.284646	-0.336201	0.736719	0.912029	C4
MAPKAPK2	-0.129514	0.13758	-0.94137	0.346522	All	-0.399167	0.140139	0.726242	0.664602	0.207012	-0.194875	0.210868	-0.600618	-0.94137	0.346515	0.72621	C4
MAPRE3	0.454635	0.274402	1.65682	0.0975657	All	-0.0831838	0.992454	0.471259	0.664602	0.412882	0.684071	1.49332	-0.125178	1.65682	0.0975561	0.471213	C4
MED21	0.204159	0.0937331	2.17809	0.0294062	All	0.0204459	0.387873	0.286099	0.664602	0.141036	0.30719	0.583622	0.030759	2.17809	0.0293991	0.28603	C4
CPTP	-0.0648865	0.0754946	-0.859486	0.390079	All	-0.212853	0.0830801	0.756187	0.664602	0.113594	-0.0976322	0.125011	-0.320276	-0.859486	0.390072	0.756164	C4
CPQ	-0.190339	0.0663096	-2.87046	0.00410142	All	-0.320303	-0.0603743	0.101143	0.664602	0.0997734	-0.286395	-0.0908392	-0.481951	-2.87046	0.00409881	0.101039	C4
CPLX2	-0.0724799	0.0579275	-1.25122	0.210864	All	-0.186016	0.0410558	0.613281	0.664602	0.0871612	-0.109058	0.0617782	-0.279894	-1.25122	0.210855	0.613255	C4
CPXM2	-0.0767974	0.0493156	-1.55726	0.119418	All	-0.173454	0.0198594	0.504976	0.664602	0.0742033	-0.115554	0.0298844	-0.260992	-1.55726	0.119408	0.504935	C4
CREBZF	-0.0119359	0.0485899	-0.245646	0.805958	All	-0.10717	0.0832985	0.940624	0.664602	0.0731113	-0.0179595	0.125339	-0.161258	-0.245646	0.805956	0.940622	C4
CREB3	-0.00665777	0.10392	-0.0640664	0.948918	All	-0.210337	0.197021	0.983882	0.664602	0.156364	-0.0100177	0.296456	-0.316491	-0.0640664	0.948917	0.983882	C4
COL24A1	-0.0800649	0.1055	-0.75891	0.447912	All	-0.286841	0.126711	0.787475	0.664602	0.158741	-0.120471	0.190663	-0.431604	-0.75891	0.447906	0.787466	C4
COL4A4	0.108103	0.099433	1.08719	0.276961	All	-0.0867824	0.302988	0.678735	0.664602	0.149613	0.162658	0.455899	-0.130584	1.08719	0.276953	0.678716	C4
COL3A1	-0.00434558	0.0448225	-0.0969509	0.922766	All	-0.092196	0.0835048	0.975947	0.664602	0.0674426	-0.00653862	0.125649	-0.138726	-0.0969509	0.922765	0.975946	C4
COL2A1	0.00223486	0.151001	0.0148003	0.988192	All	-0.293721	0.298191	0.996388	0.664602	0.227205	0.0033627	0.448685	-0.441959	0.0148003	0.988192	0.996388	C4
COL28A1	0.00605323	0.140233	0.0431657	0.96557	All	-0.268798	0.280904	0.990774	0.664602	0.211002	0.00910806	0.422673	-0.404457	0.0431657	0.965569	0.990774	C4
COL15A1	0.131949	0.0530533	2.48711	0.0128835	All	0.0279668	0.235932	0.195054	0.664602	0.0798271	0.198539	0.355	0.0420777	2.48711	0.0128785	0.19498	C4
[truncated: 9,768 more rows]

## Sheet: ST.5
MR RESULTS OF PROTEINS-T2D ASSOCIATION
protein	outcome	method	nsnp	b	se	pval	lci	uci
[truncated: 6,260 more rows]

## Sheet: ST.6
SENSITIVITY ANALYSES RESULTS OF PROTEIN-T2D ASSOCIATIONS
[truncated: 10 more rows]
